# Supplementary material
Source: Royal Society of Chemistry journal article supplement (doi:10.1039/d6cc01657j)
Supplement: d6cc01657j1.pdf [file d6cc01657j1.pdf]

## **Mn(II)-Catalyzed Switchable Synthesis of P(O)–C and P(O)–O Bonds from Alcohols and Diarylphosphine Oxides via Phospha-Brook Rearrangement**

Hirak Jyoti Phukan,<sup>a</sup> Arup Samanta,<sup>a</sup> Kailash Mohar,<sup>a</sup> Avijit Mondal,<sup>a</sup> Rinku Dihingia<sup>a</sup> and Dipankar Srimani<sup>\*a</sup>

<sup>a</sup>Department of Chemistry, Indian Institute of Technology-Guwahati, Kamrup, Assam 781039, India.  
E-mail: dsrimani@iitg.ac.in

## List of Content

|                                                                              |           |
|------------------------------------------------------------------------------|-----------|
| 1. General considerations.....                                               | S3        |
| 2. Preparation of starting materials.....                                    | S3-S4     |
| 3. General Procedure.....                                                    | S4-S5     |
| 4. Optimization table.....                                                   | S5-S6     |
| 5. Gram Scale synthesis.....                                                 | S6        |
| 6. Procedure for post synthetic applications.....                            | S7-S9     |
| 7. Mechanistic studies.....                                                  | S9-S16    |
| 8. Kinetic studies.....                                                      | S16-S17   |
| 9. SC-XRD data of substrate.....                                             | S17-S21   |
| 10. Mass spectrometric data of catalytic intermediate.....                   | S22       |
| 11. NMR data of substrate scope.....                                         | S23-S48   |
| 12. Figures <sup>1</sup> H and <sup>13</sup> C NMR spectra of compounds..... | S49-S206  |
| 13. References.....                                                          | S207-S208 |

## 1. General considerations:

Unless otherwise mentioned, all chemicals were purchased from common commercially available sources and used as received. All solvents were dried by using standard procedure. The catalyst Mn (1- 4) was prepared according to the previous reported procedure.<sup>1</sup> All catalytic reactions were carried out under argon atmosphere using dried glassware and standard syringe/septa techniques. DRX-400 Varian spectrometer and Bruker Advance III 400 MHz, 500 MHz and 600 MHz spectrometers were used to record <sup>1</sup>H and <sup>13</sup>C NMR spectra using CDCl<sub>3</sub> as solvent and TMS as an internal standard. Chemical shifts ( $\delta$ ) are reported in ppm and spin-spin coupling constant ( $J$ ) are expressed in Hz, and other data are reported as follows: s = singlet, d = doublet, t = triplet, m = multiplet, q = quartet, dt = doublet of triplet, td = triplet of doublet, dd = triplet of doublet and ddd = doublet of doublet of doublet. Q-TOF ESI-MS instrument (Agilent: 6546 LC/Q-TOF) was used for recording mass spectra. PerkinElmer clarus-590 GC instrument using Elite Plot-Q is used for GC analysis. Single crystal X-RAY diffractometer (BRUKER D8QUEST) is used for single crystal data collection. SRL silica gel (100-200 mesh) was used for column chromatography.

## 2. Preparation of starting materials:

### 2.1. Preparation of (4-(((1R,2S,5R)-2-isopropyl-5-methylcyclohexyl)oxy)phenyl) methanol:

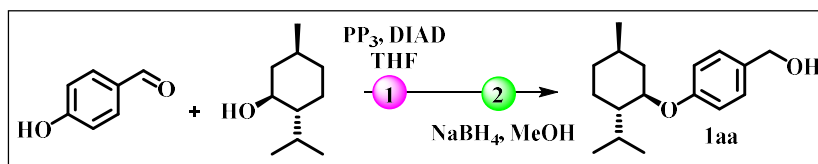

Substrate 1aa was prepared according to the reported procedure.<sup>1</sup> PPh<sub>3</sub> (1 equiv.) and DIAD (1 equiv.) were added sequentially to a solution of the 4'-hydroxy acetophenone (1.0 equiv.) and corresponding alcohol (1 equiv.) in THF (0.1 M). The resulting suspension was stirred vigorously at room temperature for 48 h. Then, the reaction mixture was concentrated in vacuo. Purification by column chromatography on silica gel (n-hexane/EtOAc) afforded the desired ethers.

To an oven dried 25 mL round bottomed flask, aldehyde (685.0 mg, 2.5 mmol, 1.0 equiv.) was dissolved in 15 mL of methanol and NaBH<sub>4</sub> (190 mg, 5.0 mmol, 2.0 equiv.) was added in a portion wise manner under stirring condition at 0 °C and the stirring was continued for overnight at room temperature. Then the solvent was evaporated and 15 mL of water was added. After that, it was extracted by (3×15 mL) CH<sub>2</sub>Cl<sub>2</sub> and the combined organic phase was dried over Na<sub>2</sub>SO<sub>4</sub>. Then the solvent was evaporated to get the desired alcohol 1aa in 80% (2.0 mmol) yield.

### 2.4. Preparation of diarylphosphine oxide compounds:<sup>2</sup>

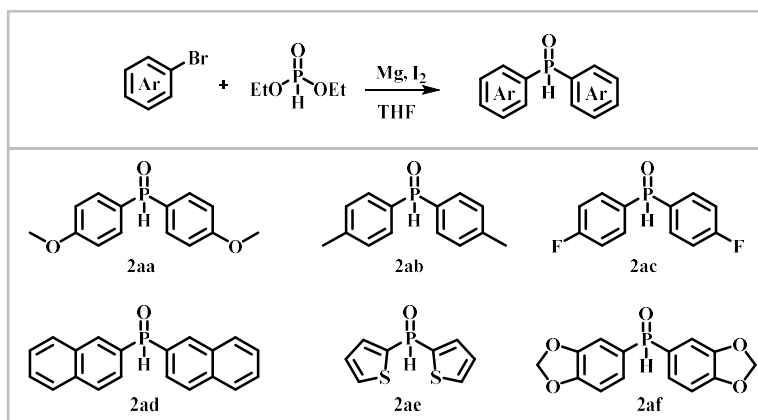

Substrates 2aa – 2af were prepared according to the reported procedure.<sup>2</sup> Diethylphosphite (1.29 mL, 10.0 mmol) was added dropwise at 0 °C to a solution of phenylmagnesium bromide in tetrahydrofuran which was prepared from aryl bromides (32.6 mmol) and magnesium (0.95 g, 39.6 mmol). The mixture was aged for 30 min at 0 °C, then stirred at ambient temperature for 16 h. After that it was cooled again to 0 °C, and 75 mL NH<sub>4</sub>Cl aqueous was then added slowly. The mixture was extracted with diethyl ether and the organic phase was washed with NaHCO<sub>3</sub> aqueous and brine, then it was dried over Na<sub>2</sub>SO<sub>4</sub>. After the solvent had been completely removed, the residue was purified by column chromatography on silica gel to give the product.

### 3. General Procedure

#### 3.1: General Procedure for synthesising of P(O)-C compounds:

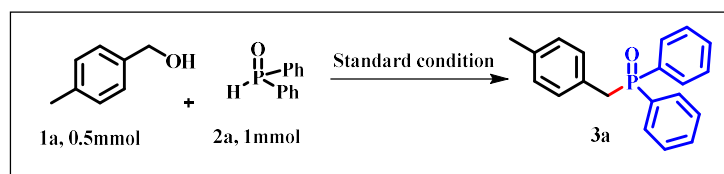

To an oven dried 100 mL seal tube 4-methylbenzyl alcohol, **1a** (0.5 mmol), HPOPh<sub>2</sub>, **2b** (1 mmol), Cs<sub>2</sub>CO<sub>3</sub> (50 mol%) and **Mn 1** (5 mol%) were taken and connected with high vacuum for 10 minutes. Then 2 mL Hexane were added to the mixture under argon. The resulting mixture was then placed into the preheated oil bath at 140 °C for 24 h. Then the reaction mixture was cooled to room temperature and filtered through celite. The filtrate was concentrated under vacuum, the residue was purified by column chromatography over silica gel (100-200 mesh) with petroleum ether/ethyl acetate mixture (1:1) as eluent.

#### 3.2. General Procedure for synthesising of P(O)-O compounds:

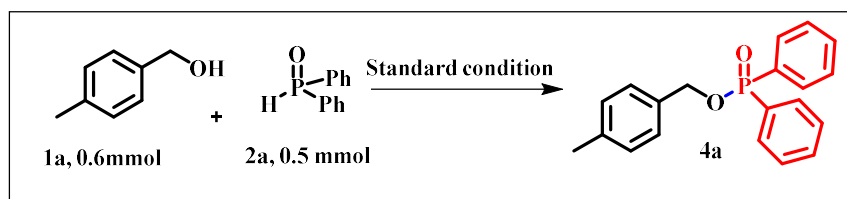

In an oven dried well-capped 100 mL ace pressure tube 4-methylbezy alcohol **1a** (0.6 mmol), diphenylphosphine oxide **2a** (0.5 mmol), Cs<sub>2</sub>CO<sub>3</sub> (50 mol%), Mn 1 catalyst (5 mol%) and Hexane (2 mL) were added in a gentle stream of argon. The tube was then closed and stirred in a preheated oil bath at 140 °C for 24 h. After that, reaction mixture was cooled to room temperature and it was filtered through celite and concentrated in vacuum, subsequently purified by column chromatography over silica gel (100–200 mesh) with petroleum-ether/ethyl acetate mixture as eluent.

#### 4. Optimization table:

##### 4.1. Optimization table for benzylic alcohol:

| Entry | 1a(equiv.) | 2a(equiv.) | Base(equiv.)                          | Cat.(mol%)                | Solvent(2mL) | Time (h) | Temp( °C) | % Yiled of 3a | % Yield of 4a |
|-------|------------|------------|---------------------------------------|---------------------------|--------------|----------|-----------|---------------|---------------|
| 1     | 1          | 2          | KOBu(1)                               | Mn1(5)                    | Hexane       | 24       | 140       | -             | -             |
| 2     | 1          | 2          | KOH(1)                                | Mn1(5)                    | Hexane       | 24       | 140       | 13            | <5            |
| 3     | 1          | 2          | K <sub>2</sub> CO <sub>3</sub> (1)    | Mn1(5)                    | Hexane       | 24       | 140       | 26            | 10            |
| 4     | 1          | 2          | Na <sub>2</sub> CO <sub>3</sub> (1)   | Mn1(5)                    | Hexane       | 24       | 140       | -             | -             |
| 5     | 1          | 2          | Cs <sub>2</sub> CO <sub>3</sub> (1)   | Mn1(5)                    | Hexane       | 24       | 140       | 91            | <5            |
| 6     | 1          | 2          | Cs <sub>2</sub> CO <sub>3</sub> (.75) | Mn1(5)                    | Hexane       | 24       | 140       | 88            | <5            |
| 7     | 1          | 2          | Cs <sub>2</sub> CO <sub>3</sub> (.5)  | Mn1(5)                    | Hexane       | 24       | 140       | 90            | <5            |
| 8     | 1          | 2          | Cs <sub>2</sub> CO <sub>3</sub> (.4)  | Mn1(5)                    | Hexane       | 24       | 140       | 65            | <5            |
| 9     | 1          | 2          | Cs <sub>2</sub> CO <sub>3</sub> (.5)  | Mn1(5)                    | Hexane       | 36       | 140       | 90            | <5            |
| 10    | 1          | 2          | Cs <sub>2</sub> CO <sub>3</sub> (.5)  | Mn1(5)                    | Hexane       | 12       | 140       | 54            | 5             |
| 11    | 1          | 2          | Cs <sub>2</sub> CO <sub>3</sub> (.5)  | -----                     | Hexane       | 24       | 140       | 6             | 15            |
| 12    | 1          | 1          | Cs <sub>2</sub> CO <sub>3</sub> (.5)  | Mn1(5)                    | Hexane       | 24       | 140       | 31            | 28            |
| 13    | 1.2        | 1          | Cs <sub>2</sub> CO <sub>3</sub> (.5)  | Mn1(5)                    | Hexane       | 24       | 140       | 30            | 65            |
| 14    | 1.2        | 1          | Cs <sub>2</sub> CO <sub>3</sub> (.5)  | Fe(acac) <sub>3</sub> (5) | Hexane       | 24       | 140       | 50            | <5            |
| 15    | 1.2        | 1          | Cs <sub>2</sub> CO <sub>3</sub> (.5)  | Fe(acac) <sub>3</sub> (5) | Cyclohexane  | 24       | 140       | 40            | <5            |
| 16    | 1.2        | 1          | Cs <sub>2</sub> CO <sub>3</sub> (.5)  | Fe(acac) <sub>3</sub> (5) | Cyclohexane  | 24       | 80        | 00            | 00            |
| 17    | 1          | 2          | Cs <sub>2</sub> CO <sub>3</sub> (.5)  | Mn1(5)                    | Cyclohexane  | 24       | 140       | 71            | 5             |
| 18    | 1          | 2          | Cs <sub>2</sub> CO <sub>3</sub> (.5)  | Mn1(5)                    | Decaline     | 24       | 140       | -             | 6             |
| 19    | 1          | 2          | Cs <sub>2</sub> CO <sub>3</sub> (.5)  | Mn1(5)                    | Xylene       | 24       | 140       | 6             | 24            |
| 20    | 1          | 2          | Cs <sub>2</sub> CO <sub>3</sub> (.5)  | Mn1(5)                    | Toluene      | 24       | 140       | 60            | 20            |
| 21    | 1          | 2          | Cs <sub>2</sub> CO <sub>3</sub> (.5)  | Mn1(5)                    | THF          | 24       | 140       | 60            | <5            |
| 22    | 1          | 2          | Cs <sub>2</sub> CO <sub>3</sub> (.5)  | Mn1(5)                    | Hexane       | 24       | 120       | 46            | 12            |
| 23    | 1          | 2          | CsF(.5)                               | Mn1(5)                    | Hexane       | 24       | 140       | 0             | 10            |
| 24    | 1          | 2          | CsOH.H <sub>2</sub> O(.5)             | Mn1(5)                    | Hexane       | 24       | 140       | 0             | 0             |
| 25    | 1          | 2          | Cs <sub>2</sub> CO <sub>3</sub> (.5)  | Mn2(5)                    | Hexane       | 24       | 140       | 75            | <5            |
| 26    | 1          | 2          | Cs <sub>2</sub> CO <sub>3</sub> (.5)  | Mn3(5)                    | Hexane       | 24       | 140       | 80            | <5            |
| 27    | 1          | 2          | Cs <sub>2</sub> CO <sub>3</sub> (.5)  | Mn4(5)                    | Hexane       | 24       | 140       | 60            | <5            |

<sup>a</sup>**Conditions:** 1a (0.5 – 0.6 mmol), 2a (0.5 - 1.0 mmol), Base (0.4-1.0 equiv.), Mn-catalyst (5 mol%), Hexane (2.0 mL), Under argon, Temperature: 120 - 140 °C, Time: 12 - 36 h, isolated yield.

## 4.2. Optimization table for long chain aliphatic alcohol:

| Entry | A(equiv.) | B(equiv.) | Base(equiv.)                        | Cat.(mol%)                 | Solvent (2mL) | Time(h) | Temp(°C) | Yield of C | Yield of D |
|-------|-----------|-----------|-------------------------------------|----------------------------|---------------|---------|----------|------------|------------|
| 1     | 1         | 2         | Cs <sub>2</sub> CO <sub>3</sub> (5) | Mn1(5)                     | Hexane        | 24      | 140      | 5          | 38         |
| 2     | 1         | 2         | Cs <sub>2</sub> CO <sub>3</sub> (2) | Mn1(5)                     | Hexane        | 24      | 140      | 34         | 20         |
| 3     | 1         | 3         | Cs <sub>2</sub> CO <sub>3</sub> (2) | Mn1(5)                     | Hexane        | 24      | 140      | 45         | 15         |
| 4     | 1         | 4         | Cs <sub>2</sub> CO <sub>3</sub> (2) | Mn1(5)                     | Hexane        | 24      | 140      | 58         | 20         |
| 5     | 1         | 4         | Cs <sub>2</sub> CO <sub>3</sub> (2) | Mn1(10)                    | Hexane        | 24      | 140      | 75         | 10         |
| 7     | 1         | 4         | Cs <sub>2</sub> CO <sub>3</sub> (2) | Mn1(10)                    | Hexane        | 36      | 140      | 80         | 5          |
| 8     | 1         | 4         | Cs <sub>2</sub> CO <sub>3</sub> (2) | Mn1(10)                    | Hexane        | 36      | 120      | 10         | 70         |
| 9     | 1         | 4         | Cs <sub>2</sub> CO <sub>3</sub> (2) | Mn1(10)                    | Hexane        | 36      | 100      | --         | 15         |
| 10    | 1         | 3         | Cs <sub>2</sub> CO <sub>3</sub> (2) | Mn1(10)                    | Hexane        | 36      | 120      | 5          | 85         |
| 11    | 1         | 3         | Cs <sub>2</sub> CO <sub>3</sub> (2) | Fe(acac) <sub>3</sub> (10) | Hexane        | 36      | 120      | 36         | 18         |

<sup>a</sup>**Conditions:** 1a (0.5 mmol), 2a (1 - 2.0 mmol), Base (0.5 – 2 equiv.), Mn-catalyst (5.0-10 mol%), Hexane (2.0 mL), Under argon, Temperature: 100 - 140 °C, Time: 24 - 36 h; isolated yield.

This study revealed that an appropriate dehydrogenation rate appears to be crucial in comparison to the 1,2-phospha-Brook rearrangement step and the subsequent interconversion between P(O)–O and P(O)–C bonds. If the dehydrogenation process is significantly slower than these competing steps, achieving selectivity toward the P(O)–O product may become difficult. This scenario could explain the observed limitations in selectivity with the Fe(acac)<sub>3</sub>

## 5. Gram Scale synthesis:

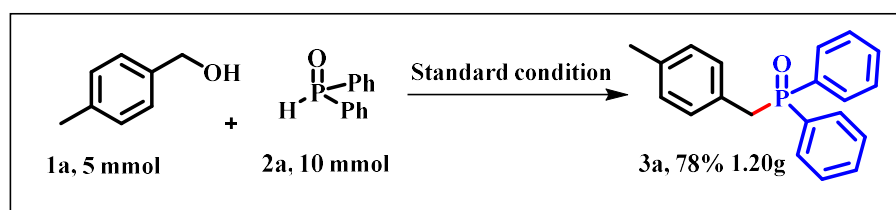

To an oven dried 100 mL seal tube 4-methylbenzyl alcohol, **1a** (5 mmol), HPOPh<sub>2</sub>, **2b** (10 mmol), Cs<sub>2</sub>CO<sub>3</sub> (50 mol%) and **Mn 1** (5 mol%) were taken and connected with high vacuum for 10 minutes. Then 10 mL Hexane were added to the mixture under argon. The resulting

mixture was then placed into the preheated oil bath at 140 °C for 24 h. Then the reaction mixture was cooled to room temperature and filtered through celite. The filtrate was concentrated under vacuum, the residue was purified by column chromatography over silica gel (100-200 mesh) with petroleum ether/ethyl acetate mixture (1:1) as eluent, and 1.20 g of **4a** was obtained. Yield 78%, white solid.

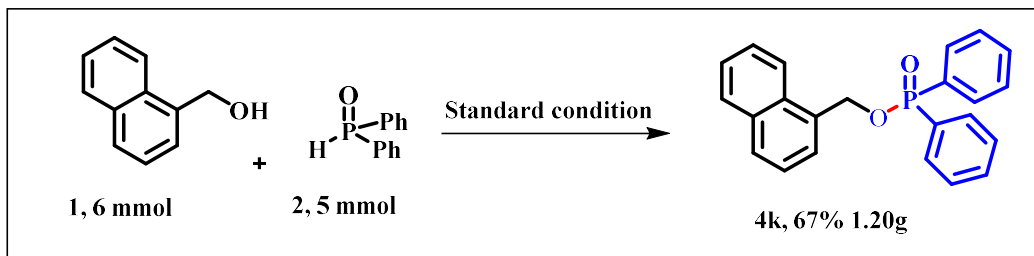

To an oven dried 100 mL seal tube naphthalen-1-ylmethanol, **1** (6 mmol), HPOPh<sub>2</sub>, **2** (5 mmol), Cs<sub>2</sub>CO<sub>3</sub> (50 mol%) and **Mn 1** (5 mol%) were taken and connected with high vacuum for 10 minutes. Then 10 mL Hexane were added to the mixture under argon. The resulting mixture was then placed into the preheated oil bath at 140 °C for 24 h. Then the reaction mixture was cooled to room temperature and filtered through celite. The filtrate was concentrated under vacuum, the residue was purified by column chromatography over silica gel (100-200 mesh) with petroleum ether/ethyl acetate mixture (1:1) as eluent, and 1.20 g of **4k** was obtained. Yield 67%, colourless oil.

## 6. Procedure for post synthetic applications

### 6.1. General procedure for synthesis of (4-methylbenzyl)diphenylphosphane:<sup>3</sup>

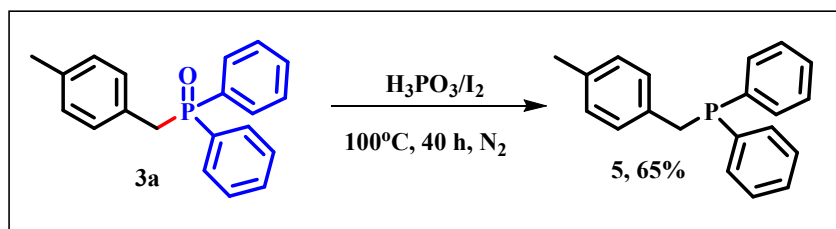

Under argon, a mixture of phosphine oxide **3a** (0.3mmol), H<sub>3</sub>PO<sub>3</sub> (0.9mmol), and I<sub>2</sub> (0.3mmol) was stirred in a 10 mL closed sealed tube in a heating mantle at 100 °C for 40 h. After the mixture was cooled to room temperature, the reaction was quenched with water and the mixture was extracted with CHCl<sub>3</sub>. The combined organic layer was dried over Na<sub>2</sub>SO<sub>4</sub> and filtered. After the evaporation of the solvent under reduced pressure, the residue was further purified by column chromatography on silica gel to give product **5**.

### 6.2. General procedure for synthesis of (4-methylbenzyl)diphenylphosphine sulphide:<sup>4</sup>

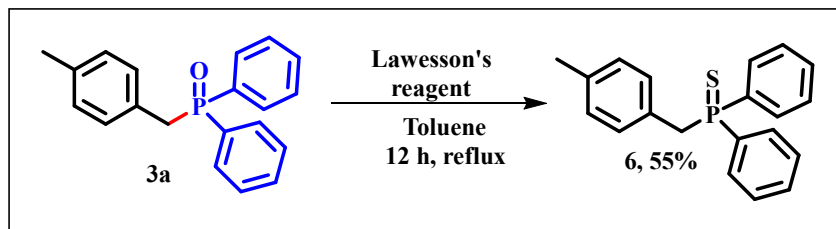

A dry reaction tube was charged with **3a** (0.2 mmol, 1.0 equiv.) and Lawesson's Reagent (0.1 mmol, 0.5 equiv.) under an argon atmosphere, then dry toluene (2 mL) was added. The reaction mixture was refluxed and stirred for 6 h. Upon completion, the reaction mixture was cooled to room temperature. Then the solution was concentrated in vacuum. And then the residue was purified by flash chromatography on silica gel (PE:EA=30:1-10:1) to give the product **6** in 55% yield.

### 6.3. General procedure for synthesis of symmetrical (E)-1,2-di-p-tolylene:<sup>5</sup>

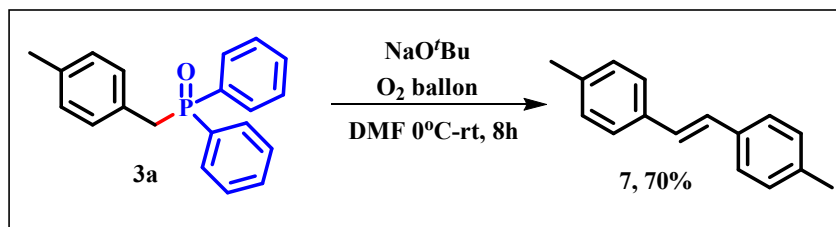

Under O<sub>2</sub>, a mixture of **3a** (0.3 mmol), *t*-BuONa (0.45 mmol, 1.5 equiv), and DMF (1.5 mL) was stirred in a 25 mL sealed tube in a heating mantle at 0 °C for 30 min. Then the mixture was further stirred at room temperature for 12 h. After the reaction had reached completion, the mixture was concentrated and the residue was further purified by column chromatography on silica gel to give product **7**.

### 6.4. General procedure for synthesis of asymmetrical (E)-1-methyl-4-styrylbenzene:<sup>5</sup>

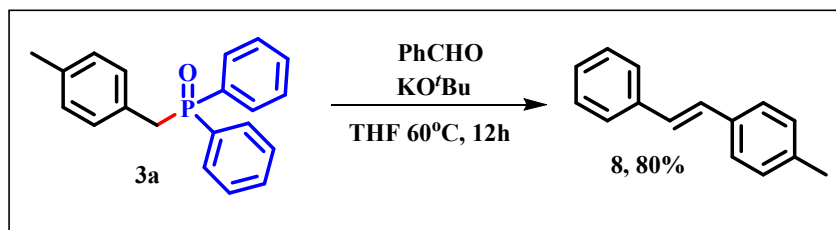

Under argon, a mixture of aldehydes **1** (0.3 mmol), **4** (0.3 mmol, 1.0 equiv), *t*-BuOK (0.6 mmol, 2.0 equiv, 67.2 mg), and THF (1.5 mL) was stirred in a 10 mL sealed tube in a heating mantle at 60 °C for 12 h. After the mixture was cooled to room temperature, 3 mL of THF was added to dilute the reaction mixture. The organic layer was concentrated, and the residue was further purified by column chromatography on silica gel to give product **8**.

## 7. Mechanistic studies:

### 7.1. Test for carbocation;

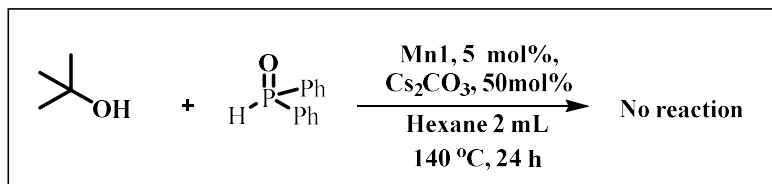

To an oven dried 100 mL seal tube, tert-butyl alcohol (0.5 mmol),  $\text{HPOPh}_2$  (1 mmol),  $\text{Cs}_2\text{CO}_3$  (50 mol%) and **Mn 1** (5 mol%) were taken and connected with high vacuum for 10 minutes. Then 2 mL Hexane were added to the mixture under argon. The resulting mixture was then placed into the preheated oil bath at 140 °C for 24 h. Then the reaction mixture was cooled to room temperature and filtered through celite. The filtrate was concentrated under vacuum, and the residue was analyzed by NMR spectroscopy which indicates that no P(O)-C and P(O)-O were formed which clearly reveals that the product formation does not occur via carbocation formation.

### 7.2. Test for alcohol dehydrogenation:

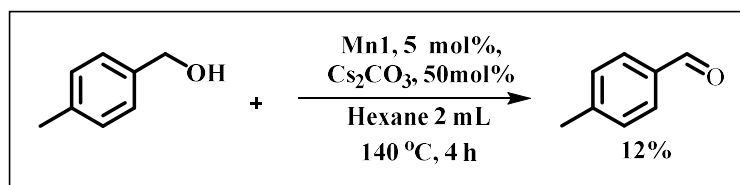

To an oven dried 100 mL seal tube, 4-methyl benzyl alcohol (0.5 mmol),  $\text{Cs}_2\text{CO}_3$  (50 mol%) and **Mn 1** (5 mol%) were taken and connected with high vacuum for 10 minutes. Then 2 mL Hexane were added to the mixture under argon. The resulting mixture was then placed into the preheated oil bath at 140 °C for 24 h. Then the reaction mixture was cooled to room temperature and filtered through celite. The filtrate was concentrated under vacuum, and the residue was analyzed by NMR spectroscopy which indicates that 12% of 4-methylbenzaldehyde was formed which clearly reveals that aldehyde is forming during the reaction.

### 7.3. Detection of intermediate:

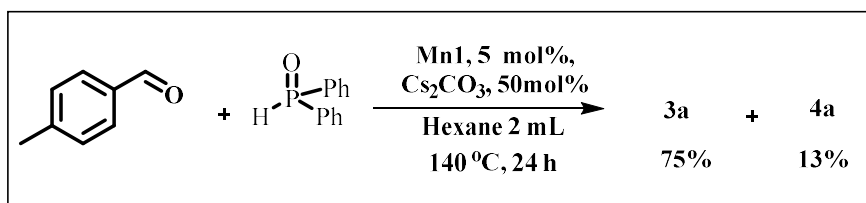

To an oven dried 100 mL seal tube, 4-methylbenzaldehyde (0.5 mmol),  $\text{HPOPh}_2$  (1 mmol),  $\text{Cs}_2\text{CO}_3$  (50 mol%) and **Mn 1** (5 mol%) were taken and connected with high vacuum for 10

minutes. Then 2 mL Hexane were added to the mixture under argon. The resulting mixture was then placed into the preheated oil bath at 140 °C for 24 h. Then the reaction mixture was cooled to room temperature and filtered through celite. The filtrate was concentrated under vacuum, the residue was purified by column chromatography over silica gel (100-200 mesh) with petroleum ether/ethyl acetate mixture (1:1) as eluent. 75% of **3a** and 13% of **4a** was formed which indicates that the reaction proceeds via involvement of aldehyde.

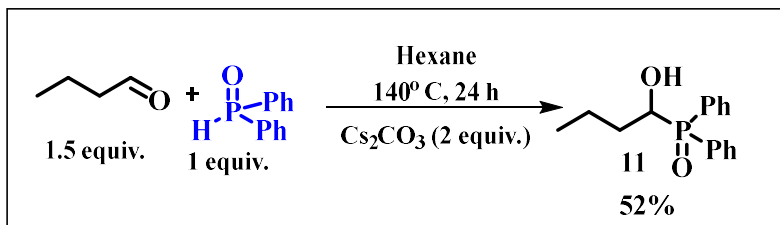

To an oven dried 100 mL seal tube, butyraldehyde (1.5 mmol), HPOPh<sub>2</sub> (**1** mmol), Cs<sub>2</sub>CO<sub>3</sub> (2 equiv.) were taken and connected with high vacuum for 10 minutes. Then 2 mL Hexane were added to the mixture under argon. The resulting mixture was then placed into the preheated oil bath at 140 °C for 24 h. Then the reaction mixture was cooled to room temperature and filtered through celite. The filtrate was concentrated under vacuum, the residue was purified by column chromatography over silica gel (100-200 mesh) with petroleum ether/ethyl acetate mixture (1:1) as eluent. 52% of **11** was formed.

**(1-hydroxybutyl)diphenylphosphine oxide (11): White solid, yield: 71 mg 52 %, <sup>1</sup>H**

**NMR (400 MHz, Chloroform-*d*)** δ 7.89 – 7.84 (m, 2H), 7.79 – 7.75 (m, 2H), 7.54 – 7.49 (m, 2H), 7.47 – 7.41 (m, 4H), 4.41 – 4.38 (m, 1H), 1.69 – 1.59 (m, 3H), 1.44 – 1.34 (m, 1H), 0.85 (t, *J* = 6.9 Hz, 3H). **<sup>13</sup>C NMR (125 MHz, CDCl<sub>3</sub>)** δ 132.1 (d, *J*<sub>C-P</sub> = 8.7 Hz), 132.0 (d, *J*<sub>C-P</sub> = 8.7 Hz), 131.6 (d, *J*<sub>C-P</sub> = 8.5 Hz), 131.5 (d, *J*<sub>C-P</sub> = 8.5 Hz), 130.5 (d, *J*<sub>C-P</sub> = 95.9 Hz), 130.4 (d, *J*<sub>C-P</sub> = 95.9 Hz), 128.7 (d, *J*<sub>C-P</sub> = 10.8 Hz), 128.6 (d, *J*<sub>C-P</sub> = 10.5 Hz), 70.5 (d, *J*<sub>C-P</sub> = 83.3 Hz), 32.6 (d, *J*<sub>C-P</sub> = 3.0 Hz), 19.3 (d, *J*<sub>C-P</sub> = 12.0 Hz), 13.7. **<sup>31</sup>P NMR (200 MHz, CDCl<sub>3</sub>)** δ 32.1.

**HRMS (ESI+):** *m/z* calcd. C<sub>16</sub>H<sub>19</sub>O<sub>2</sub>P For [M+H]<sup>+</sup>: 275.1196; Found: 275.1190.

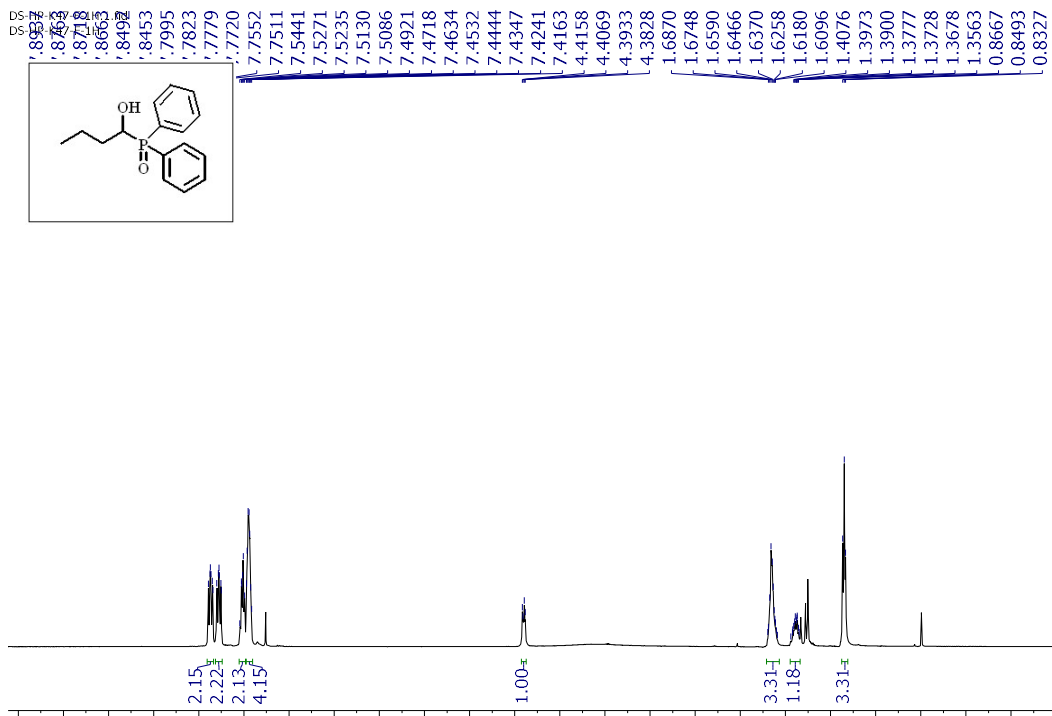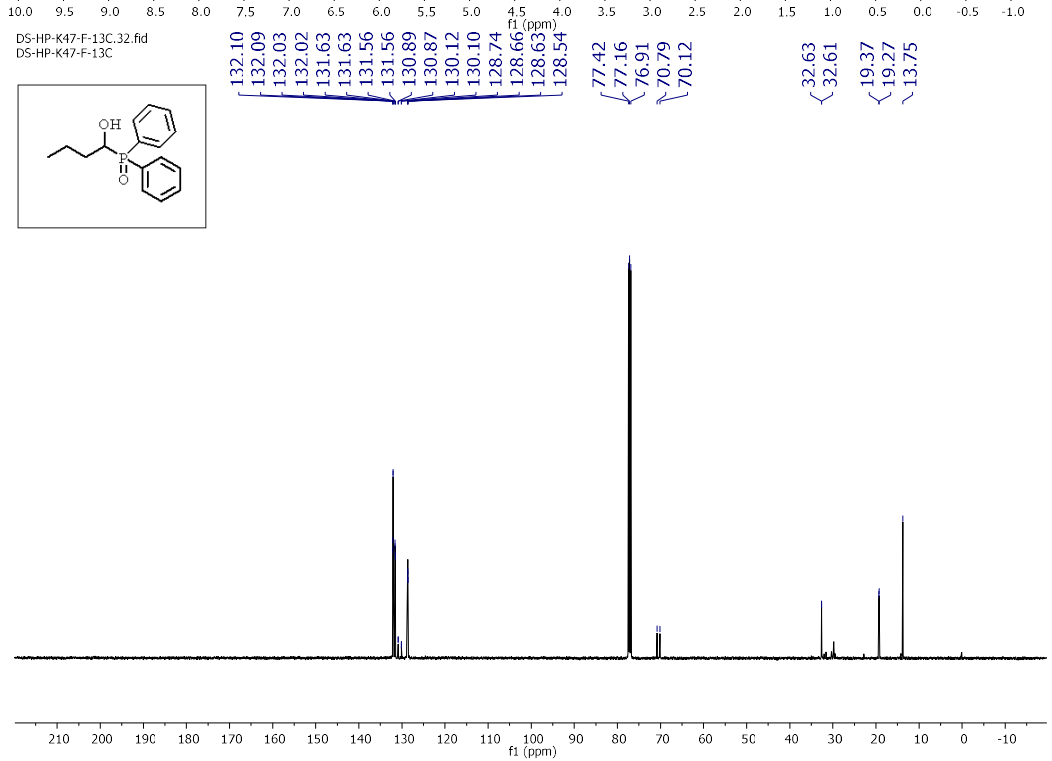

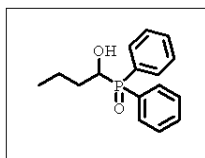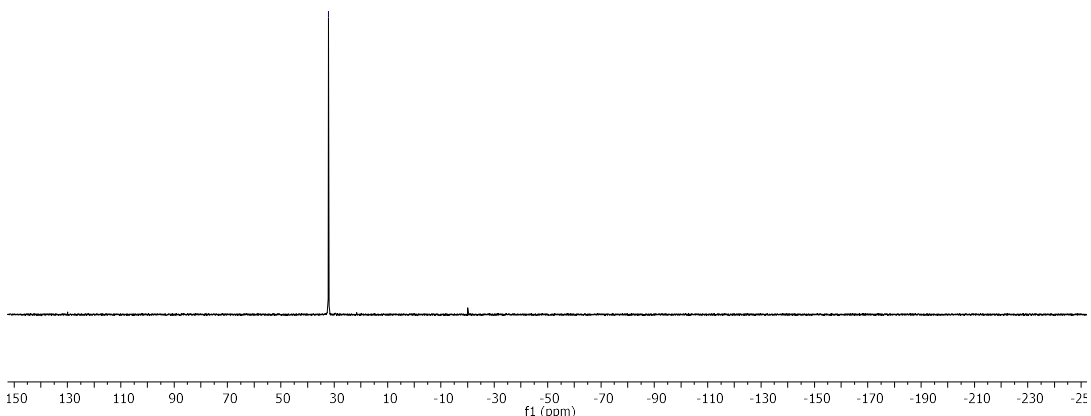

Figure S1.  $^1\text{H}$  NMR (400 MHz),  $^{13}\text{C}\{^1\text{H}\}$  NMR (125 MHz), and  $^{31}\text{P}\{^1\text{H}\}$  NMR (200 MHz) spectrum of Compound 11 in  $\text{CDCl}_3$

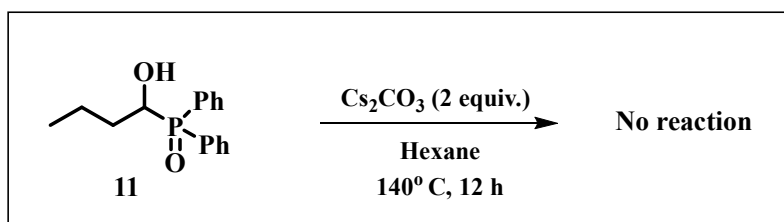

To an oven dried 100 mL seal tube,  $\alpha$ -hydroxy phosphine oxide 11 (1 equiv.) and  $\text{Cs}_2\text{CO}_3$  (2 equiv.) were taken and connected with high vacuum for 10 minutes. Then 2 mL Hexane were added to the mixture under argon. The resulting mixture was then placed into the preheated oil bath at  $140^\circ\text{C}$  for 12 h. Then the reaction mixture was cooled to room temperature and filtered through celite. The filtrate was concentrated under vacuum and resulted no product formation.

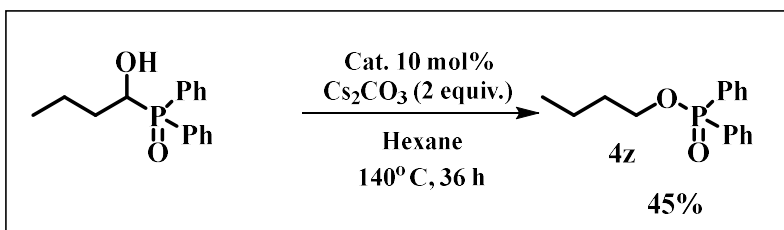

To an oven dried 100 mL seal tube,  $\alpha$ -hydroxy phosphine oxide 11 (1 equiv.),  $\text{Cs}_2\text{CO}_3$  (2 equiv.) and Mn 1 (10 mol%) were taken and connected with high vacuum for 10 minutes. Then

2 mL Hexane were added to the mixture under argon. The resulting mixture was then placed into the preheated oil bath at 140 °C for 12 h. Then the reaction mixture was cooled to room temperature and filtered through celite. The filtrate was concentrated under vacuum, the residue was purified by column chromatography over silica gel (100-200 mesh) with petroleum ether/ethyl acetate mixture (1:1) as eluent. 45% of **4z** was formed. The results suggest that the conversion of  $\alpha$ -hydroxy phosphine oxides derived from aliphatic aldehydes into the corresponding Brook-type rearrangement products cannot be accomplished by cesium carbonate alone. We have clearly observed that our catalyst plays a crucial role in promoting this transformation and enabling the rearrangement step. Moreover, *insitu* slow generation of aldehyde from alcohol is essential for the formation of high yield of the desired compounds.

#### 7.4. Radical quencing Test:

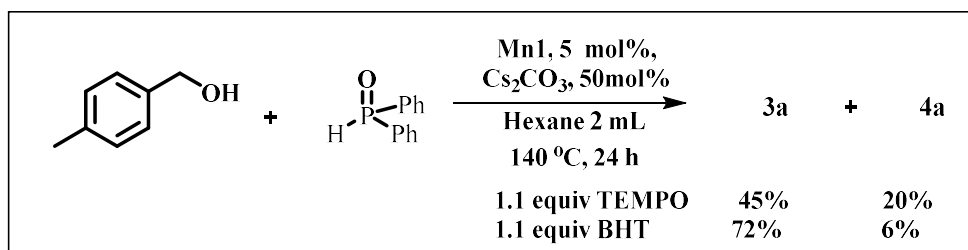

To an oven dried 100 mL seal tube , 4-methylbenzyl alcohol (0.5 mmol), HPOPh<sub>2</sub> (**1** mmol), Cs<sub>2</sub>CO<sub>3</sub> (50 mol%), **Mn 1** (5 mol%) and radical inhibitor (TEMPO or BHT) were taken and connected with high vacuum for 10 minutes. Then 2 mL Hexane were added to the mixture under argon. The resulting mixture was then placed into the preheated oil bath at 140 °C for 24 h. Then the reaction mixture was cooled to room temperature and filtered through celite. The filtrate was concentrated under vacuum, the residue was purified by column chromatography over silica gel (100-200 mesh) with petroleum ether/ethyl acetate mixture (1:1) as eluent. Addition of TEMPO and BHT did not hamper the reaction indicating non-radical pathway.

#### 7.5. Hydride trapping experiment:

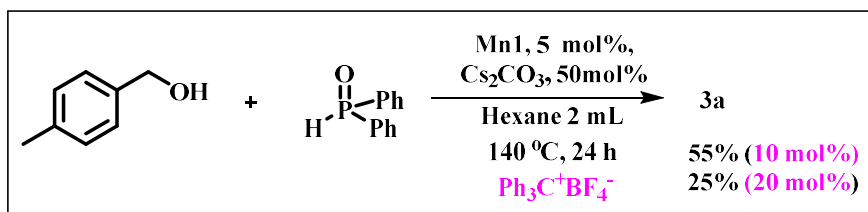

In an oven dried 100 mL seal tube , 4-methylbenzyl alcohol (0.5 mmol), HPOPh<sub>2</sub> (**1** mmol), Cs<sub>2</sub>CO<sub>3</sub> (50 mol%), **Mn 1** (5 mol%) were added sequentially inside the argon filled glove box. Then reaction mixture was stirred at room temperature. After stirring for 20 mins, tritylium

tetrafluoroborate is added to the previous reaction mixture. The resulting mixture was then placed into the preheated oil bath at 140 °C for 24 h. Then the reaction mixture was cooled to room temperature and filtered through celite. The filtrate was concentrated under vacuum, the residue was purified by column chromatography over silica gel (100-200 mesh) with petroleum ether/ethyl acetate mixture (1:1) as eluent. This result indicates the in-situ formation of Mn-H.

### 7.6. Homogeneity test:

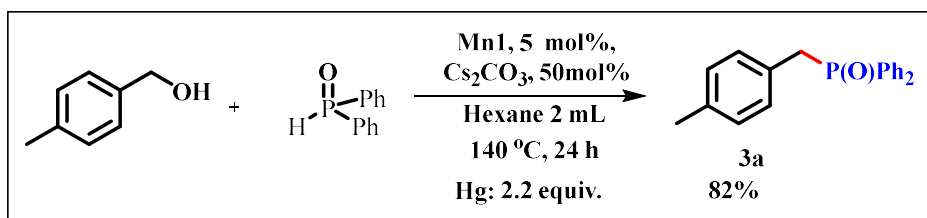

To a 100 ml oven dried pressure tube containing magnetic stir bar 4-methylbenzyl alcohol (0.5 mmol), HPOPh<sub>2</sub> (**1** mmol), Cs<sub>2</sub>CO<sub>3</sub> (50 mol%), **Mn 1** (5 mol%) were added followed by addition of Hg (1.1 mmol), and Hexane (2 mL). Tube was sealed under argon and placed in preheated oil bath at 120 °C for 12 h. After completion of the reaction tube was cooled to room temperature and crude reaction mixture was filtered through small plug of celite. The filtrate was concentrated under vacuum, the residue was purified by column chromatography over silica gel (100-200 mesh) with petroleum ether/ethyl acetate mixture (1:1) as eluent which resulted 82% of **3a** formation and this indicates that our reaction protocol is homogeneous in nature.

### 7.7. Detection of evolved hydrogen gas by GC-Thermal Detector (GC-TCD):

To an oven dried 100 mL seal tube 4-methylbenzyl alcohol, **1a** (5 mmol), HPOPh<sub>2</sub>, **2b** (10 mmol), Cs<sub>2</sub>CO<sub>3</sub> (50 mol%) and **Mn 1** (5 mol%) were taken and connected with high vacuum for 10 minutes. Then 10 mL Hexane were added to the mixture under argon. The resulting mixture was then placed into the preheated oil bath at 140 °C for 24 h. After completion of the reaction, the Ace pressure tube was cooled at 0 °C, the evolved gas was syringed out and detected from PerkinElmer clarus-590 GC instrument using Elite-Q PLOT Capillary Column (30 m length x 530 μm x 20 μm ID) employing the following method:

TCD starting temperature: 40 °C

Oven temperature: 60 °C

Time at starting temperature: 0 min

Hold time: 5 min

Ramp: 28 °C/ min up to 200 °C

Flow rate: 5 mL/ min (N2)

Split ration: 20

Inlet temperature: 40 °C

Detector temperature TCD: 200 °C

The detected gas chromatogram was shown in figure S2 (right).

Oven temperature: 60 °C

Time at starting temperature: 0 min

Hold time: 5 min

Ramp: 28 °C/ min up to 200 °C

Flow rate: 5 mL/ min (N2)

Split ration: 20

Inlet temperature: 40 °C

Detector temperature TCD: 200 °C

The detected gas chromatogram was shown in figure S2 (right).

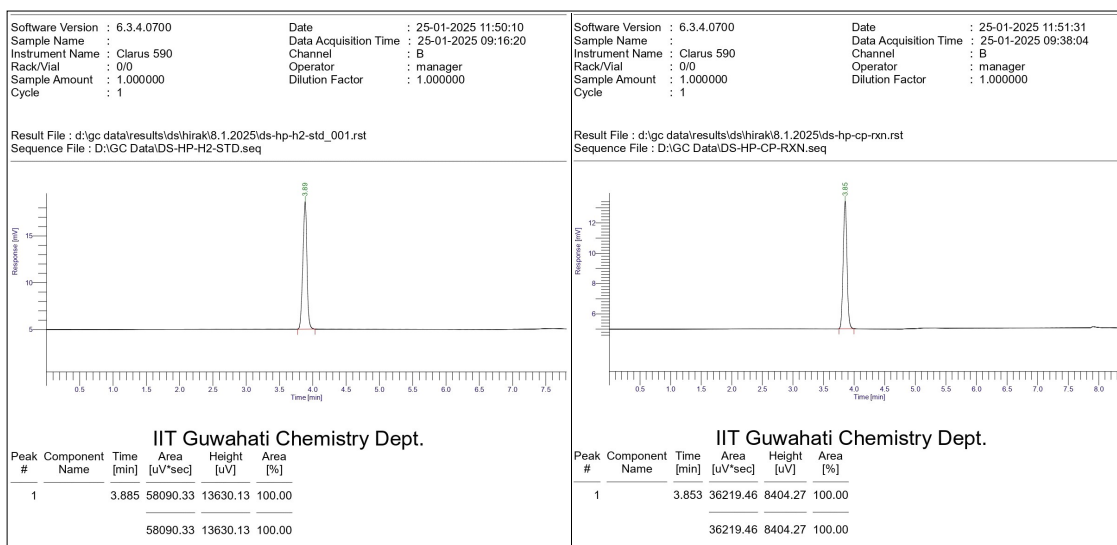

Figure S2. Chromatogram of standard hydrogen gas (left) and evolved hydrogen gas during catalysis (right).

### 7.8 Influence of base and catalyst in the substitution steps

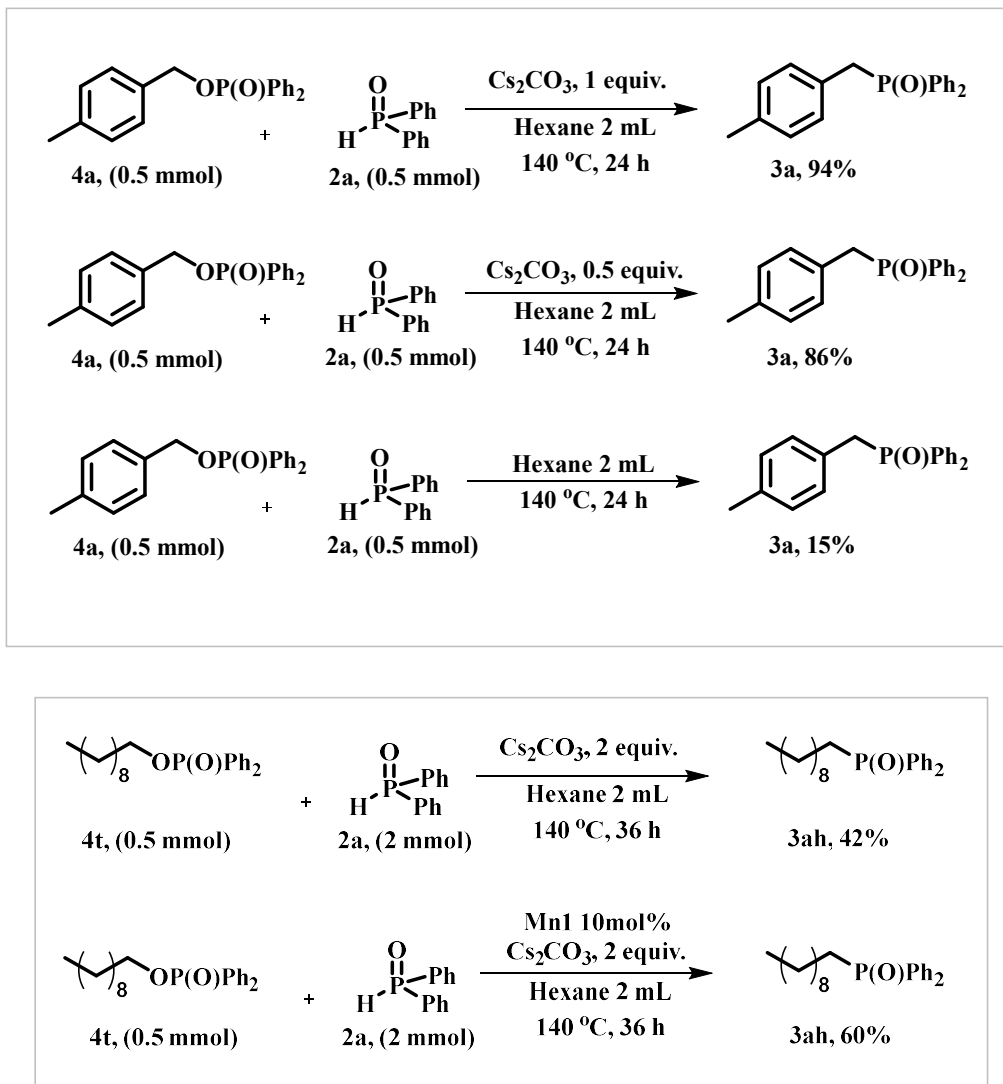

## 8. Kinetic studies

### 8.1 Experimental procedure:

Nine different reactions were set up under the standard reaction condition and the reaction mixtures were analyzed by  $^1\text{H}$  NMR after 1h, 2h, 4h, 6h, 10h, 14h, 18h, 22h and 24h respectively using  $\text{CH}_3\text{NO}_2$  as external standard. The data was accomplished to draw the percentage (%) vs time (h) plot.

| Time (h) | 1a (%) | 2a (%) | 3a (%) | 4a (%) |
|----------|--------|--------|--------|--------|
| 0        | 100    | 100    | -      | -      |

|    |    |      |    |     |
|----|----|------|----|-----|
| 1  | 80 | 68   | 5  | 7   |
| 2  | 75 | 56   | 8  | 10  |
| 4  | 57 | 47.5 | 28 | 15  |
| 6  | 40 | 42.5 | 45 | 15  |
| 10 | 35 | 33.5 | 52 | 10  |
| 14 | 30 | 22.5 | 65 | 5   |
| 18 | 20 | 13.5 | 72 | 5   |
| 22 | 15 | 7.5  | 80 | 5   |
| 24 | 5  | 1.5  | 88 | 3.5 |

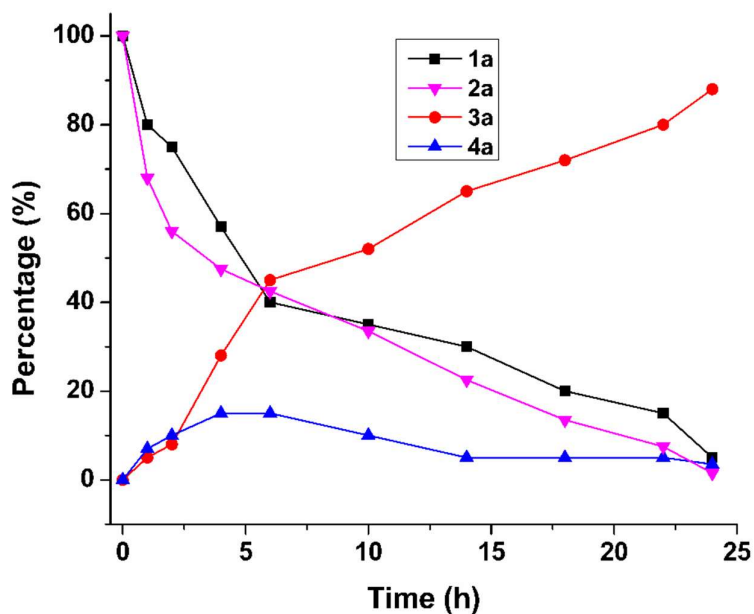

Fig. S3: Overall reaction kinetics.

## 9. SC-XRD data of substrate 3a and xx:

### 9.1. Crystal data of substrate 3a:

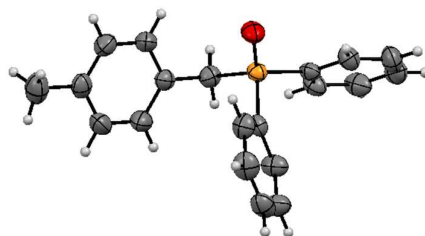

|                   |                                     |  |
|-------------------|-------------------------------------|--|
| CCDC              | 2525491                             |  |
| Empirical formula | C <sub>20</sub> H <sub>19</sub> O P |  |
| Formula weight    | 306.34                              |  |
| Temperature, T    | 295(2)                              |  |
| Crystal system    | monoclinic                          |  |
| Space group       | 'P 1 21/c 1'                        |  |

|                                                  |                                                                                    |  |
|--------------------------------------------------|------------------------------------------------------------------------------------|--|
| Unit cell dimensions                             | a=5.7473(7)Å<br>α=90°<br>b=17.567(2) Å<br>β=97.413(3)°<br>c=16.107(2) Å      γ=90° |  |
| Volume, V (Å <sup>3</sup> )                      | 1612.6(4)                                                                          |  |
| Z                                                | 4                                                                                  |  |
| Density (calculated), g cm <sup>-3</sup>         | 1.262                                                                              |  |
| Absorption coefficient, μ<br>(mm <sup>-1</sup> ) | 0.170                                                                              |  |
| F (000)                                          | 648.740                                                                            |  |
| Crystal size, mm <sup>3</sup>                    | 0.46 × 0.38 × 0.33                                                                 |  |
| Theta range for data collection                  | 2.32 to 25.00                                                                      |  |
| Index ranges                                     | -6 ≤ h ≤ 6<br>-20 ≤ k ≤ 20<br>-19 ≤ l ≤ 19                                         |  |
| Reflections collected                            | 2797                                                                               |  |
| Independent reflections                          | 2464                                                                               |  |
| Completeness to theta                            | 0.9869                                                                             |  |
| Absorption correction                            | none                                                                               |  |
| Refinement method                                | 'f and \w scans'                                                                   |  |
| Data / restraints / parameters                   | 2797 / 0 / 200                                                                     |  |
| Goodness-of-fit on F <sup>2</sup>                | 1.0837                                                                             |  |
| Final R indices [I>2σ(I)]                        | R1 = 0.0476, wR2 = 0.1075                                                          |  |
| R indices (all data)                             | R1 = 0.0548, wR2 = 0.1125                                                          |  |
| Largest diff. peak and hole                      | 0.2960 and -0.3475 e <sup>-</sup> Å <sup>-3</sup>                                  |  |
| Bond Distances [Å]                               | Bond angles [°]                                                                    |  |
| P001 O002 1.4841(17)                             | C003 P001 O002 111.40(11)                                                          |  |
| P001 C003 1.808(2)                               | C004 P001 O002 112.39(10)                                                          |  |
| P001 C004 1.804(2)                               | C004 P001 C003 104.17(10)                                                          |  |
| P001 C008 1.809(2)                               | C008 P001 O002 113.79(11)                                                          |  |
| C003 C009 1.381(3)                               | C008 P001 C003 106.32(11)                                                          |  |
| C003 C00D 1.385(3)                               | C008 P001 C004 108.15(11)                                                          |  |
| C004 C005 1.384(3)                               | C009 C003 P001 119.02(19)                                                          |  |
| C004 C00B 1.389(3)                               | C00D C003 P001 122.42(18)                                                          |  |
| C005 H005 0.9300                                 | C00D C003 C009 118.5(2)                                                            |  |
| C005 C00J 1.394(4)                               | C005 C004 P001 124.83(19)                                                          |  |
| C006 H006 0.9300                                 | C00B C004 P001 115.89(18)                                                          |  |
| C006 C007 1.384(3)                               | C00B C004 C005 119.2(2)                                                            |  |
| C006 C00A 1.378(4)                               | H005 C005 C004 120.18(15)                                                          |  |
| C007 C008 1.513(3)                               | C00J C005 C004 119.6(2)                                                            |  |
| C007 C00H 1.381(3)                               | C00J C005 H005 120.18(17)                                                          |  |
| C008 H00a 0.9700                                 | C007 C006 H006 119.53(15)                                                          |  |
| C008 H00b 0.9700                                 | C00A C006 H006 119.53(16)                                                          |  |
| C009 H009 0.9300                                 | C00A C006 C007 120.9(2)                                                            |  |
| C009 C00K 1.377(4)                               | C008 C007 C006 120.7(2)                                                            |  |
| C00A H00c 0.9300                                 | C00H C007 C006 117.6(2)                                                            |  |
| C00A C00C 1.379(4)                               | C00H C007 C008 121.7(2)                                                            |  |
| C00B H00d 0.9300                                 | C007 C008 P001 110.24(16)                                                          |  |

|                                                                                                                                                                                                                                                                                                                                                                                                                                                    |                                                                                                                                                                                                                                                                                                                                                                                                                                                                                                                                                                                                                                                                                                                                                                                                                                                                                                                                                                                                                                                                                                                                                                                                                                                                                                                                                                                                                |  |
|----------------------------------------------------------------------------------------------------------------------------------------------------------------------------------------------------------------------------------------------------------------------------------------------------------------------------------------------------------------------------------------------------------------------------------------------------|----------------------------------------------------------------------------------------------------------------------------------------------------------------------------------------------------------------------------------------------------------------------------------------------------------------------------------------------------------------------------------------------------------------------------------------------------------------------------------------------------------------------------------------------------------------------------------------------------------------------------------------------------------------------------------------------------------------------------------------------------------------------------------------------------------------------------------------------------------------------------------------------------------------------------------------------------------------------------------------------------------------------------------------------------------------------------------------------------------------------------------------------------------------------------------------------------------------------------------------------------------------------------------------------------------------------------------------------------------------------------------------------------------------|--|
| C00B C00E 1.382(4)<br>C00C C00I 1.379(4)<br>C00C C00M 1.511(4)<br>C00D H00e 0.9300<br>C00D C00L 1.382(4)<br>C00E H00f 0.9300<br>C00E C00G 1.371(4)<br>C00F H00g 0.9300<br>C00F C00K 1.366(4)<br>C00F C00L 1.370(4)<br>C00G H00h 0.9300<br>C00G C00J 1.367(4)<br>C00H H00i 0.9300<br>C00H C00I 1.384(4)<br>C00I H00j 0.9300<br>C00J H00k 0.9300<br>C00K H00l 0.9300<br>C00L H00m 0.9300<br>C00M H00n 0.9600<br>C00M H00o 0.9600<br>C00M H00p 0.9600 | H00a C008 P001 109.61(8)<br>H00a C008 C007 109.61(13)<br>H00b C008 P001 109.61(8)<br>H00b C008 C007 109.61(13)<br>H00b C008 H00a 108.1<br>H009 C009 C003 119.62(15)<br>C00K C009 C003 120.8(3)<br>C00K C009 H009 119.62(17)<br>H00c C00A C006 119.15(16)<br>C00C C00A C006 121.7(3)<br>C00C C00A H00c 119.15(16)<br>H00d C00B C004 119.75(14)<br>C00E C00B C004 120.5(2)<br>C00E C00B H00d 119.75(17)<br>C00I C00C C00A 117.3(2)<br>C00M C00C C00A 120.7(3)<br>C00M C00C C00I 122.0(3)<br>H00e C00D C003 119.84(14)<br>C00L C00D C003 120.3(2)<br>C00L C00D H00e 119.84(17)<br>H00f C00E C00B 120.10(17)<br>C00G C00E C00B 119.8(3)<br>C00G C00E H00f 120.10(17)<br>C00K C00F H00g 120.05(16)<br>C00L C00F H00g 120.05(17)<br>C00L C00F C00K 119.9(3)<br>H00h C00G C00E 119.76(17)<br>C00J C00G C00E 120.5(3)<br>C00J C00G H00h 119.76(16)<br>H00i C00H C007 119.47(16)<br>C00I C00H C007 121.1(3)<br>C00I C00H H00i 119.47(16)<br>C00H C00I C00C 121.4(3)<br>H00j C00I C00C 119.31(16)<br>H00j C00I C00H 119.31(16)<br>C00G C00J C005 120.3(3)<br>H00k C00J C005 119.85(17)<br>H00k C00J C00G 119.85(16)<br>C00F C00K C009 120.2(3)<br>H00l C00K C009 119.90(17)<br>H00l C00K C00F 119.90(16)<br>C00F C00L C00D 120.3(3)<br>H00m C00L C00D<br>119.87(17)<br>H00m C00L C00F 119.87(17)<br>H00n C00M C00C 109.5<br>H00o C00M C00C 109.5<br>H00o C00M H00n 109.5<br>H00p C00M C00C 109.5<br>H00p C00M H00n 109.5 |  |
|----------------------------------------------------------------------------------------------------------------------------------------------------------------------------------------------------------------------------------------------------------------------------------------------------------------------------------------------------------------------------------------------------------------------------------------------------|----------------------------------------------------------------------------------------------------------------------------------------------------------------------------------------------------------------------------------------------------------------------------------------------------------------------------------------------------------------------------------------------------------------------------------------------------------------------------------------------------------------------------------------------------------------------------------------------------------------------------------------------------------------------------------------------------------------------------------------------------------------------------------------------------------------------------------------------------------------------------------------------------------------------------------------------------------------------------------------------------------------------------------------------------------------------------------------------------------------------------------------------------------------------------------------------------------------------------------------------------------------------------------------------------------------------------------------------------------------------------------------------------------------|--|

## 9.1. Crystal data of substrate 3r

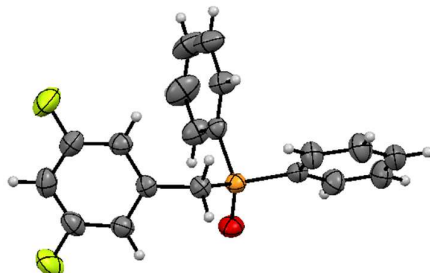

|                                               |                                                                                                     |
|-----------------------------------------------|-----------------------------------------------------------------------------------------------------|
| CCDC                                          | 2525490                                                                                             |
| Empirical formula                             | C <sub>19</sub> H <sub>15</sub> F <sub>2</sub> O P                                                  |
| Formula weight                                | 328.28                                                                                              |
| Temperature, T                                | 295(2)                                                                                              |
| Crystal system                                | triclinic                                                                                           |
| Space group                                   | 'P -1'                                                                                              |
| Unit cell dimensions                          | a=5.8317(4)Å      α=67.662(2)<br>b=11.0586(8)Å      β=81.084(2)°<br>c=13.6838(10)Å      γ=81.329(2) |
| Volume, V (Å <sup>3</sup> )                   | 802.30(10)                                                                                          |
| Z                                             | 2                                                                                                   |
| Density (calculated), g cm <sup>-3</sup>      | 1.359                                                                                               |
| Absorption coefficient, μ (mm <sup>-1</sup> ) | 0.193                                                                                               |
| F (000)                                       | 340                                                                                                 |
| Crystal size, mm <sup>3</sup>                 | 0.46 × 0.38 × 0.33                                                                                  |
| Theta range for data collection               | 2.999 to 24.999                                                                                     |
| Index ranges                                  | -6 ≤ h ≤ 6<br>-13 ≤ k ≤ 13<br>-16 ≤ l ≤ 16                                                          |
| Reflections collected                         | 2783                                                                                                |
| Independent reflections                       | 2552                                                                                                |
| Completeness to theta                         | 0.988                                                                                               |
| Absorption correction                         | none                                                                                                |
| Refinement method                             | 'f and \w scans'                                                                                    |
| Data / restraints / parameters                | 2783 /0/ 208                                                                                        |
| Goodness-of-fit on F <sup>2</sup>             | 0.695                                                                                               |
| Final R indices [I>2σ(I)]                     | R1 = 0.0325, wR2 = 0.0983                                                                           |
| R indices (all data)                          | R1 = 0.0359, wR2 = 0.1080                                                                           |
| Largest diff. peak and hole                   | 0.283 and -0.264 e·Å <sup>-3</sup>                                                                  |
| Bond Distances [Å]                            | Bond angles [°]                                                                                     |
| P001 O1 1.4843(11)                            | O1 P001 C007 111.85(7)                                                                              |
| P001 C007 1.8031(15)                          | O1 P001 C00A 111.81(7)                                                                              |
| P001 C00A 1.8051(15)                          | C007 P001 C00A 105.70(7)                                                                            |
| P001 C006 1.8098(15)                          | O1 P001 C006 113.97(7)                                                                              |

|                    |                           |
|--------------------|---------------------------|
| F1 C00G 1.355(2)   | C007 P001 C006 106.48(7)  |
| F2 C00F 1.359(2)   | C00A P001 C006 106.49(7)  |
| C005 C009 1.390(2) | C009 C005 C008 119.68(14) |
| C005 C008 1.390(2) | C009 C005 C006 119.15(14) |
| C005 C006 1.508(2) | C008 C005 C006 121.17(14) |
| C007 C00I 1.378(2) | C005 C006 P001 112.58(10) |
| C007 C00B 1.388(2) | C00I C007 C00B 119.29(15) |
| C008 C00G 1.373(2) | C00I C007 P001 118.66(13) |
| C009 C00F 1.371(2) | C00B C007 P001 122.02(12) |
| C00A C00C 1.382(2) | C00G C008 C005 118.36(15) |
| C00A C00D 1.388(2) | C00F C009 C005 118.61(16) |
| C00B C00K 1.384(3) | C00C C00A C00D 118.70(15) |
| C00C C00E 1.387(2) | C00C C00A P001 124.67(12) |
| C00D C00L 1.379(3) | C00D C00A P001 116.63(12) |
| C00E C00J 1.372(3) | C00K C00B C007 119.96(18) |
| C00F C00H 1.370(3) | C00A C00C C00E 120.45(16) |
| C00G C00H 1.370(3) | C00L C00D C00A 120.62(17) |
| C00I C00N 1.390(3) | C00J C00E C00C 120.06(18) |
| C00J C00L 1.373(3) | F2 C00F C00H 117.92(16)   |
| C00K C00M 1.370(3) | F2 C00F C009 118.45(17)   |
| C00M C00N 1.365(3) | C00H C00F C009 123.63(16) |
|                    | F1 C00G C00H 117.87(16)   |
|                    | F1 C00G C008 118.42(17)   |
|                    | C00H C00G C008 123.71(16) |
|                    | C00F C00H C00G 116.00(16) |
|                    | C007 C00I C00N 120.07(19) |
|                    | C00E C00J C00L 120.03(17) |
|                    | C00M C00K C00B 120.2(2)   |
|                    | C00J C00L C00D 120.14(17) |
|                    | C00N C00M C00K 120.27(18) |
|                    | C00M C00N C00I 120.2(2)   |

**10. Mass spectrometric data of catalytic intermediate:**

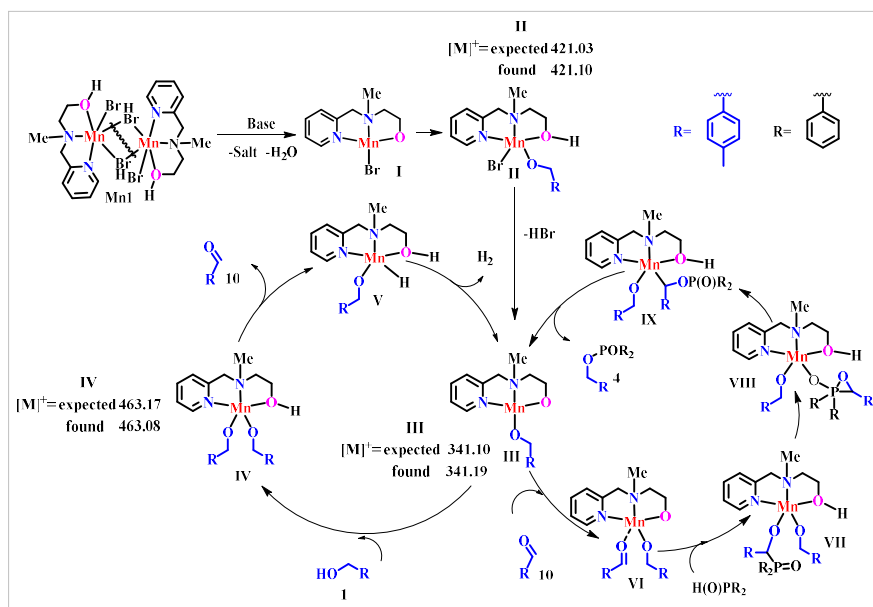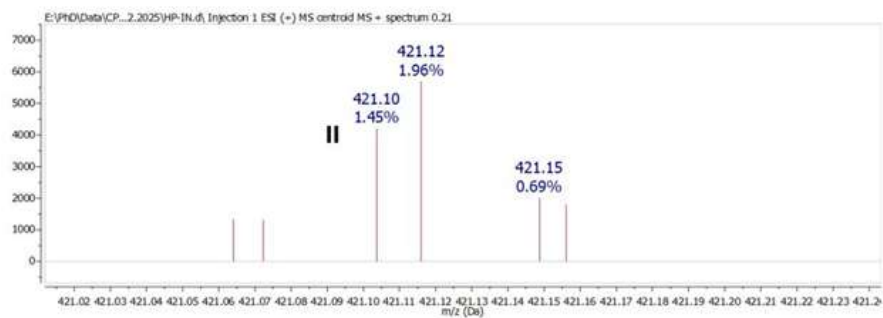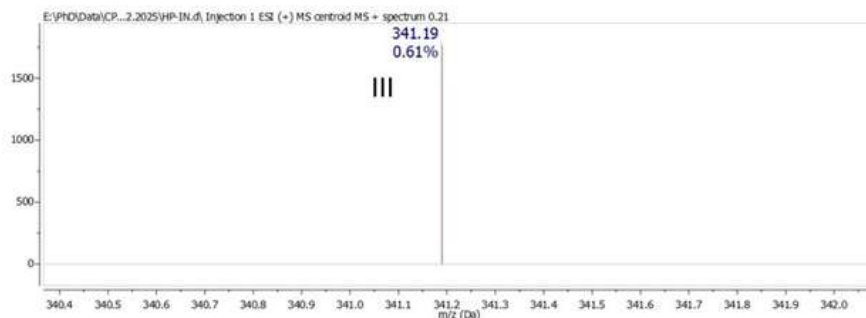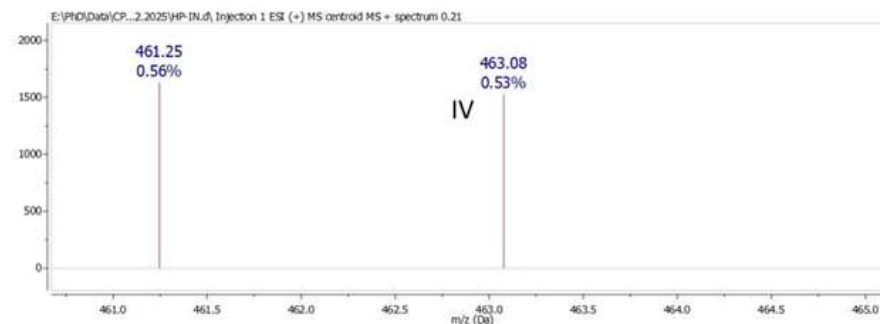

Figure S4: Mass spectrometric data of catalytic intermediate

## 10. NMR data of substrate scope:

**(4-Methylbenzyl)diphenylphosphine oxide (3a):**<sup>7</sup> Isolated as white solid; Yield: 138 mg (90%); <sup>1</sup>H NMR (400 MHz, Chloroform-*d*) δ 7.72– 7.67 (m, 4H), 7.52 – 7.48 (m, 2H), 7.45 – 7.42 (m, 4H), 6.99 (s, 4H), 3.61 (d, *J* = 13.6 Hz, 2H), 2.25 (d, *J* = 1.8 Hz, 3H). <sup>13</sup>C NMR (125 MHz, CDCl<sub>3</sub>) δ 136.5 (d, *J*<sub>C-P</sub> = 3.0 Hz), 132.6 (d, *J*<sub>C-P</sub> = 98.6 Hz), 131.9 (d, *J*<sub>C-P</sub> = 2.5 Hz), 131.3 (d, *J*<sub>C-P</sub> = 8.9 Hz), 130.1 (d, *J*<sub>C-P</sub> = 5.2 Hz), 129.2 (d, *J*<sub>C-P</sub> = 2.3 Hz), 128.6 (d, *J*<sub>C-P</sub> = 11.6 Hz), 128.0 (d, *J*<sub>C-P</sub> = 8.0 Hz), 37.8 (d, *J*<sub>C-P</sub> = 66.6 Hz), 21.2. <sup>31</sup>P NMR (200 MHz, CDCl<sub>3</sub>) δ 29.4.

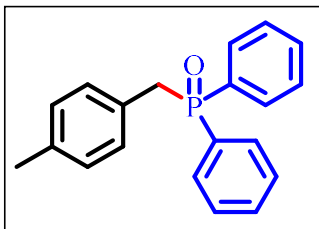

**Benzyl diphenylphosphine oxide (3b):**<sup>7</sup> Isolated as white solid; Yield: 105 mg (72%); <sup>1</sup>H NMR (400 MHz, Chloroform-*d*) δ 7.70 – 7.66 (m, 4H), 7.51 – 7.47 (m, 2H), 7.43 – 7.40 (m, 4H), 7.17 – 7.16 (m, 3H), 7.10 – 7.09 (s, 2H), 3.65 (d, *J* = 13.1 Hz, 2H). <sup>13</sup>C NMR (125 MHz, CDCl<sub>3</sub>) δ 132.3 (d, *J*<sub>C-P</sub> = 99.1 Hz), 131.9, 131.2 (d, *J*<sub>C-P</sub> = 8.4 Hz), 131.2, 130.2 (d, *J*<sub>C-P</sub> = 4.4 Hz), 128.6 (d, *J*<sub>C-P</sub> = 11.3 Hz), 128.5, 126.9, 38.2 (d, *J*<sub>C-P</sub> = 66.0 Hz). <sup>31</sup>P NMR (200 MHz, CDCl<sub>3</sub>) δ 29.6.

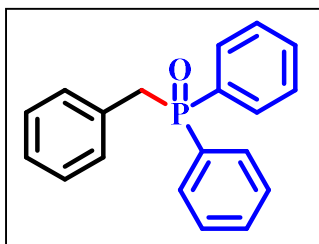

**(4-Methoxybenzyl)diphenylphosphine oxide (3c):**<sup>8</sup> Isolated as white solid; Yield: 126 mg (78%); <sup>1</sup>H NMR (500 MHz, Chloroform-*d*) δ 7.69 – 7.66 (m, 4H), 7.51 – 7.49 (m, 2H), 7.44 – 7.41 (m, 4H), 7.0 (d, *J* = 7.5 Hz, 2H), 6.72 (d, *J* = 7.0 Hz, 2H), 3.73 (s, 3H), 3.59 (d, *J* = 13.1 Hz, 2H). <sup>13</sup>C NMR (125 MHz, CDCl<sub>3</sub>) δ 158.6 (d, *J*<sub>C-P</sub> = 2.6 Hz), 132.5 (d, *J*<sub>C-P</sub> = 97.3 Hz), 131.9 (d, *J*<sub>C-P</sub> = 2.4 Hz), 131.3 (d, *J*<sub>C-P</sub> = 8.9 Hz), 131.2 (d, *J*<sub>C-P</sub> = 5.0 Hz), 128.6 (d, *J*<sub>C-P</sub> = 11.5 Hz), 123.0 (d, *J*<sub>C-P</sub> = 7.9 Hz), 114.0 (d, *J*<sub>C-P</sub> = 2.1 Hz), 55.3, 37.2 (d, *J*<sub>C-P</sub> = 67.3 Hz). <sup>31</sup>P NMR (200 MHz, CDCl<sub>3</sub>) δ 29.6.

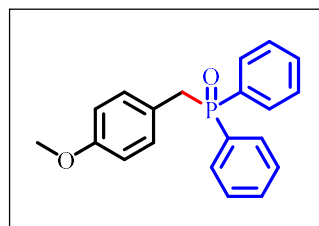

**(4-(Tert-butyl)benzyl)diphenylphosphine oxide (3f):**<sup>8</sup> Isolated as white solid; Yield: 146 mg (84%); <sup>1</sup>H NMR (500 MHz, Chloroform-*d*) δ 7.71 – 7.67 (m, 4H), 7.52 – 7.49 (m, 2H), 7.45 – 7.42 (m, 4H), 7.20 (d, *J* = 7.7 Hz, 2H), 7.02 (d, *J* = 7.5 Hz, 2H), 3.63 (d, *J* = 13.4 Hz, 2H), 1.2 (s, 9H). <sup>13</sup>C NMR (125 MHz, CDCl<sub>3</sub>) δ 149.8 (d, *J*<sub>C-P</sub> = 3.1 Hz), 132.6 (d, *J*<sub>C-P</sub> = 98.1 Hz), 131.9 (d, *J*<sub>C-P</sub> = 2.6 Hz), 131.3 (d, *J*<sub>C-P</sub> = 9.0 Hz), 129.9 (d, *J*<sub>C-P</sub> = 5.1 Hz), 128.6 (d, *J*<sub>C-P</sub> = 11.5 Hz), 128.0 (d, *J*<sub>C-P</sub> = 7.9 Hz), 125.5 (d, *J*<sub>C-P</sub> = 2.5 Hz), 37.6 (d, *J*<sub>C-P</sub> = 66.5 Hz), 34.5, 31.4. <sup>31</sup>P NMR (200 MHz, CDCl<sub>3</sub>) δ 29.7.

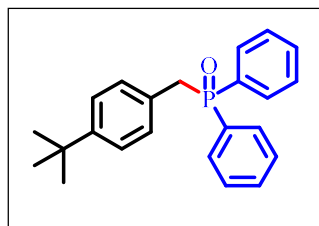

**Diphenyl(4-(trifluoromethyl)benzyl)phosphine oxide (3g):**<sup>8</sup> Isolated as white solid; Yield:

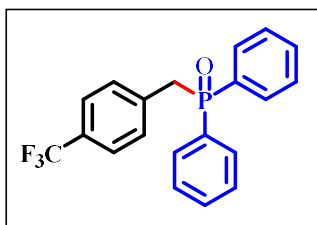

94 mg (61%); <sup>1</sup>H NMR (500 MHz, Chloroform-*d*) δ 7.71 – 7.68 (m, 4H), 7.54 – 7.51 (m, 2H), 7.47 – 7.42 (m, 6H), 7.23 – 7.21 (m, 2H), 3.70 (d, *J* = 13.2 Hz, 2H). <sup>13</sup>C NMR (125 MHz, CDCl<sub>3</sub>) δ 135.7 (d, *J*<sub>C-P</sub> = 7.3 Hz), 132.2 (d, *J*<sub>C-P</sub> = 2.1 Hz), 132.0 (d, *J*<sub>C-P</sub> = 100.0 Hz), 131.2 (d, *J*<sub>C-P</sub> = 8.9 Hz), 130.5 (d, *J*<sub>C-P</sub> = 4.6 Hz), 129.2 (qd, *J*<sub>C-F</sub> = 33.2 Hz, *J*<sub>C-P</sub> = 2.5 Hz), 128.8 (d, *J*<sub>C-P</sub> = 11.6 Hz), 125.4 (q, *J*<sub>C-F</sub> = 4.7 Hz), 124.2 (q, *J*<sub>C-F</sub> = 270.3 Hz), 38.2 (d, *J*<sub>C-P</sub> = 65.9 Hz). <sup>31</sup>P NMR (200 MHz, CDCl<sub>3</sub>) δ 29.0. <sup>19</sup>F NMR (470

MHz, CDCl<sub>3</sub>) δ -62.5.

**(4-Fluorobenzyl)diphenylphosphine oxide (3h):**<sup>8</sup> Isolated as white solid; Yield: 96 mg

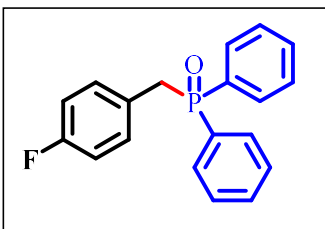

(62%); <sup>1</sup>H NMR (500 MHz, Chloroform-*d*) δ 7.70 – 7.66 (m, 4H), 7.53 – 7.50 (m, 2H), 7.45 – 7.42 (m, 4H), 7.07 – 7.05 (m, 2H), 6.87 (t, *J* = 8.4 Hz, 2H), 3.61 (d, *J* = 13.2 Hz, 2H). <sup>13</sup>C NMR (125 MHz, CDCl<sub>3</sub>) δ 162.0 (dd, *J*<sub>C-F</sub> = 243.9 Hz, *J*<sub>C-P</sub> = 3.2 Hz), 132.2 (d, *J*<sub>C-P</sub> = 98.3 Hz), 132.0 (d, *J*<sub>C-P</sub> = 2.6 Hz), 131.7 (dd, *J*<sub>C-F</sub> = 7.9 Hz, *J*<sub>C-P</sub> = 5.1 Hz), 131.2 (d, *J*<sub>C-P</sub> = 9.1 Hz), 128.7 (d, *J*<sub>C-P</sub> = 11.6 Hz), 126.9 (dd, *J*<sub>C-F</sub> = 7.9 Hz, *J*<sub>C-P</sub> = 3.1 Hz), 115.4 (dd, *J*<sub>C-F</sub> = 21.5 Hz, *J*<sub>C-P</sub> = 2.4 Hz), 37.3 (d, *J*<sub>C-P</sub> = 66.3 Hz). <sup>31</sup>P NMR (200 MHz, CDCl<sub>3</sub>) δ 29.32. <sup>19</sup>F NMR (470 MHz, CDCl<sub>3</sub>) δ -115.9 (d, *J*<sub>P-F</sub> = 4.4 Hz).

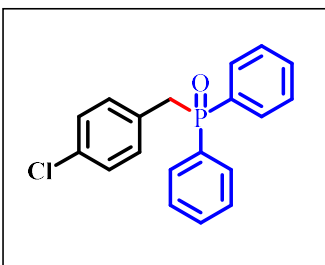

**(4-Chlorobenzyl)diphenylphosphine oxide (3i):**<sup>7</sup> Isolated as white solid; Yield: 106 mg (65%); <sup>1</sup>H NMR (400 MHz, Chloroform-*d*) δ 7.70 – 7.66 (m, 4H), 7.53 – 7.50 (m, 2H), 7.46 – 7.42 (m, 4H), 7.15 (d, *J* = 7.8 Hz, 2H), 7.04 (d, *J* = 8.0 Hz, 2H), 3.61 (d, *J* = 13.5 Hz, 2H). <sup>13</sup>C NMR (125 MHz, CDCl<sub>3</sub>) δ 133.0 (d, *J*<sub>C-P</sub> = 3.4 Hz), 132.2 (d, *J*<sub>C-P</sub> = 98.6 Hz), 132.1 (d, *J*<sub>C-P</sub> = 2.4 Hz), 131.5 (d, *J*<sub>C-P</sub> = 5.0 Hz), 131.2 (d, *J*<sub>C-P</sub> = 9.0 Hz), 129.8 (d, *J*<sub>C-P</sub> = 7.8 Hz), 128.8, 128.7 (d, *J*<sub>C-P</sub> = 4.0 Hz), 37.6 (d, *J*<sub>C-P</sub> = 65.7 Hz). <sup>31</sup>P NMR (200 MHz, CDCl<sub>3</sub>) δ 29.1.

**(4-Bromobenzyl)diphenylphosphine oxide (3j):**<sup>8</sup> Isolated as white solid; Yield: 111 mg

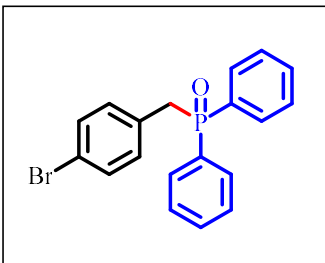

(60%); <sup>1</sup>H NMR (400 MHz, Chloroform-*d*) δ 7.70 – 7.65 (m, 4H), 7.55 – 7.50 (m, 2H), 7.47 – 7.42 (m, 4H), 7.30 (d, *J* = 8.0 Hz, 2H), 6.99 – 6.96 (m, 2H), 3.59 (d, *J* = 13.5 Hz, 2H). <sup>13</sup>C NMR (125 MHz, CDCl<sub>3</sub>) δ 132.1 (d, *J*<sub>C-P</sub> = 99.1 Hz), 132.1 (d, *J*<sub>C-P</sub> = 2.7 Hz), 131.8 (d, *J*<sub>C-P</sub> = 5.1 Hz), 131.6 (d, *J*<sub>C-P</sub> = 2.4 Hz), 131.2 (d, *J*<sub>C-P</sub> = 9.1 Hz), 130.9 (d, *J*<sub>C-P</sub> = 7.8 Hz), 128.7 (d, *J*<sub>C-P</sub> = 11.7 Hz), 121.1 (d, *J*<sub>C-P</sub> = 3.8 Hz), 37.7 (d, *J*<sub>C-P</sub> = 65.5 Hz). <sup>31</sup>P NMR (200 MHz, CDCl<sub>3</sub>) δ 29.0.

**(2-Methylbenzyl)diphenylphosphine oxide (3k):**<sup>7</sup> Isolated as white solid; Yield: 107 mg

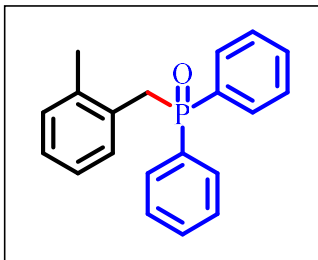

(70%); <sup>1</sup>H NMR (500 MHz, Chloroform-*d*) δ 7.69 – 7.65 (m, 4H), 7.53 – 7.50 (m, 2H), 7.45 – 7.42 (m, 4H), 7.09 – 7.07 (m, 2H), 7.00 – 6.94 (m, 2H), 3.67 (d, *J* = 13.9 Hz, 2H), 2.14 (s, 3H). <sup>13</sup>C NMR (125 MHz, CDCl<sub>3</sub>) δ 137.5 (d, *J*<sub>C-P</sub> = 5.4 Hz), 132.6 (d, *J*<sub>C-P</sub> = 97.2 Hz), 131.9 (d, *J*<sub>C-P</sub> = 2.6 Hz), 131.3 (d, *J*<sub>C-P</sub> = 9.0 Hz), 131.3 (d, *J*<sub>C-P</sub> = 4.4 Hz), 130.6 (d, *J*<sub>C-P</sub> = 2.6 Hz), 129.8 (d, *J*<sub>C-P</sub> = 8.1 Hz), 128.6 (d, *J*<sub>C-P</sub> = 11.4 Hz), 127.1 (d, *J*<sub>C-P</sub> = 3.2 Hz), 125.9 (d, *J*<sub>C-P</sub> = 2.8 Hz), 35.4 (d, *J*<sub>C-P</sub> = 66.1 Hz), 20.2. <sup>31</sup>P NMR

(200 MHz, CDCl<sub>3</sub>) δ 29.6.

**(2-Methoxybenzyl)diphenylphosphine oxide(3l):**<sup>12</sup> Isolated as white solid; Yield: 105 mg

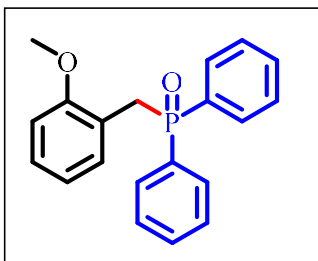

(65 %); <sup>1</sup>H NMR (500 MHz, Chloroform-*d*) δ 7.72 – 7.68 (m, 4H), 7.48 – 7.45 (m, 2H), 7.41 – 7.34 (m, 5H), 7.16 – 7.12 (m, 1H), 6.88 – 6.84 (m, 1H), 6.66 – 6.64 (m, 1H), 3.75 (d, *J* = 14.0 Hz, 2H), 3.45 (s, 3H). <sup>13</sup>C NMR (125 MHz, CDCl<sub>3</sub>) δ 157.0 (d, *J*<sub>C-P</sub> = 5.1 Hz), 133.0 (d, *J*<sub>C-P</sub> = 98.0 Hz), 131.8 (d, *J*<sub>C-P</sub> = 4.9 Hz), 131.6 (d, *J*<sub>C-P</sub> = 2.7 Hz), 131.3 (d, *J*<sub>C-P</sub> = 9.1 Hz), 128.3 (d, *J*<sub>C-P</sub> = 11.5 Hz), 128.2 (d, *J*<sub>C-P</sub> = 3.9 Hz), 120.7 (d, *J*<sub>C-P</sub> = 2.8 Hz), 120.0 (d, *J*<sub>C-P</sub> = 7.9 Hz), 110.3 (d, *J*<sub>C-P</sub> = 2.4 Hz), 55.0, 31.2 (d, *J*<sub>C-P</sub> = 67.5 Hz). <sup>31</sup>P NMR (200 MHz, CDCl<sub>3</sub>) δ 30.07.

**(2-Chlorobenzyl)diphenylphosphine oxide(3m):**<sup>10</sup> Isolated as white solid; Yield: 98 mg

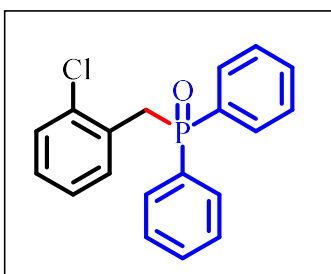

(60%); <sup>1</sup>H NMR (500 MHz, Chloroform-*d*) δ 7.72 – 7.68 (m, 4H), 7.54 – 7.49 (m, 3H), 7.44 – 7.41 (m, 4H), 7.23 – 7.22 (m, 1H), 7.18 – 7.10 (m, 2H), 3.87 (d, *J* = 13.8 Hz, 2H). <sup>13</sup>C NMR (125 MHz, CDCl<sub>3</sub>) δ 133.4 (d, *J*<sub>C-P</sub> = 6.8 Hz), 131.2 (d, *J*<sub>C-P</sub> = 99.0 Hz), 131.1 (d, *J*<sub>C-P</sub> = 4.1 Hz), 131.1 (d, *J*<sub>C-P</sub> = 2.7 Hz), 130.3 (d, *J*<sub>C-P</sub> = 9.3 Hz), 128.8 (d, *J*<sub>C-P</sub> = 6.9 Hz), 128.53 (d, *J*<sub>C-P</sub> = 2.0 Hz), 127.6 (d, *J*<sub>C-P</sub> = 11.6 Hz), 127.4 (d, *J*<sub>C-P</sub> = 2.6 Hz), 126.0 (d, *J*<sub>C-P</sub> = 2.3 Hz), 33.7 (d, *J*<sub>C-P</sub> = 66.8 Hz). <sup>31</sup>P NMR (200 MHz, CDCl<sub>3</sub>) δ 29.7.

**(3-Methoxybenzyl)diphenylphosphine oxide(3n):**<sup>11</sup> Isolated as white solid; Yield: 110 mg

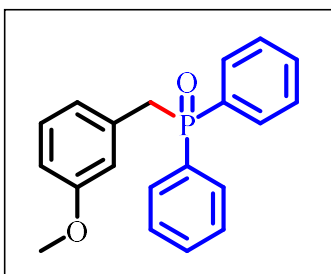

(68 %); <sup>1</sup>H NMR (500 MHz, Chloroform-*d*) δ 7.71 – 7.67 (m, 4H), 7.52 – 7.49 (m, 2H), 7.45 – 7.42 (m, 4H), 7.07 (t, *J* = 8.2 Hz, 1H), 6.72-6.67 (m, 2H), 6.62 (s, 1H), 3.64 (s, 3H), 3.64 – 3.61 (m, 2H). <sup>13</sup>C NMR (125 MHz, CDCl<sub>3</sub>) δ 159.5 (d, *J*<sub>C-P</sub> = 2.1 Hz), 132.7 (d, *J*<sub>C-P</sub> = 7.6 Hz), 132.4 (d, *J*<sub>C-P</sub> = 97.3 Hz), 131.9 (d, *J*<sub>C-P</sub> = 2.6 Hz), 131.3 (d, *J*<sub>C-P</sub> = 8.9 Hz), 129.4 (d, *J*<sub>C-P</sub> = 2.3 Hz), 128.6 (d, *J*<sub>C-P</sub> = 11.6 Hz), 122.7 (d, *J*<sub>C-P</sub> = 5.3 Hz), 115.3 (d, *J*<sub>C-P</sub> = 4.9 Hz), 113.2 (d, *J*<sub>C-P</sub> = 2.8 Hz), 55.2, 38.3 (d, *J*<sub>C-P</sub> = 66.2 Hz). <sup>31</sup>P NMR (200 MHz, CDCl<sub>3</sub>) δ 29.5.

**(2,4-Dimethoxybenzyl)diphenylphosphine oxide (3o):** Isolated as white solid; Yield: 110

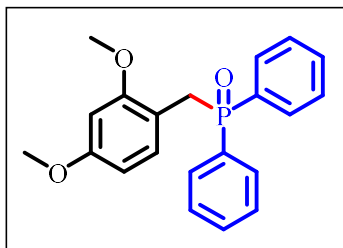

mg (62 %);  $^1\text{H NMR}$  (500 MHz, Chloroform-*d*)  $\delta$  7.71 – 7.67 (m, 4H), 7.48 – 7.45 (m, 2H), 7.41 – 7.38 (m, 4H), 7.28 – 7.26 (m, 1H), 6.4 (d,  $J=8.2$  Hz, 1H), 6.24 (s, 1H), 3.75 (s, 3H), 3.67 (d,  $J=13.6$  Hz, 2H), 3.42 (s, 3H).  $^{13}\text{C NMR}$  (125 MHz,  $\text{CDCl}_3$ )  $\delta$  160.0 (d,  $J_{\text{C-P}}=2.7$  Hz), 157.8 (d,  $J_{\text{C-P}}=5.3$  Hz), 133.0 (d,  $J_{\text{C-P}}=97.7$  Hz), 132.1 (d,  $J_{\text{C-P}}=4.5$  Hz), 131.6 (d,  $J_{\text{C-P}}=2.6$  Hz), 131.3 (d,  $J_{\text{C-P}}=9.1$  Hz), 128.3 (d,  $J_{\text{C-P}}=11.4$  Hz), 112.2 (d,  $J_{\text{C-P}}=7.8$  Hz), 104.4 (d,  $J_{\text{C-P}}=2.6$  Hz), 98.4 (d,  $J_{\text{C-P}}=2.2$  Hz), 55.4, 55.0, 30.4 (d,  $J_{\text{C-P}}=68.4$  Hz).  $^{31}\text{P NMR}$  (200 MHz,  $\text{CDCl}_3$ )  $\delta$  30.2. HRMS (ESI+):  $m/z$  calcd.  $\text{C}_{21}\text{H}_{21}\text{O}_3\text{P}$  For  $[\text{M}+\text{H}]^+$ : 353.1302; Found: 353.1278.

**Diphenyl(3,4,5-trimethoxybenzyl)phosphine oxide (3p):**<sup>7</sup> Isolated as white solid; Yield: 130

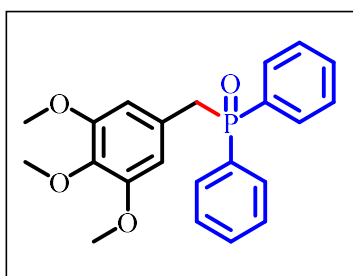

mg (68 %);  $^1\text{H NMR}$  (500 MHz, Chloroform-*d*)  $\delta$  7.73 – 7.69 (m, 4H), 7.52 – 7.50 (m, 2H), 7.47 – 7.44 (m, 4H), 6.24 – 6.23 (m, 2H), 3.77 (s, 3H), 3.60 (s, 6H), 3.59 (d,  $J=13.1$  Hz, 2H).  $^{13}\text{C NMR}$  (125 MHz,  $\text{CDCl}_3$ )  $\delta$  152.9 (d,  $J_{\text{C-P}}=2.7$  Hz), 136.9 (d,  $J_{\text{C-P}}=3.5$  Hz), 132.2 (d,  $J_{\text{C-P}}=98.5$  Hz), 131.9 (d,  $J_{\text{C-P}}=2.6$  Hz), 131.3 (d,  $J_{\text{C-P}}=9.0$  Hz), 128.6 (d,  $J_{\text{C-P}}=11.5$  Hz), 126.6 (d,  $J_{\text{C-P}}=7.9$  Hz), 107.3 (d,  $J_{\text{C-P}}=5.3$  Hz), 60.9, 56.0, 38.4 (d,  $J_{\text{C-P}}=66.3$  Hz).  $^{31}\text{P NMR}$  (200 MHz,  $\text{CDCl}_3$ )  $\delta$  29.5.

**Diphenyl(2,4,6-trimethylbenzyl)phosphine oxide (3q):**<sup>14</sup> Isolated as white solid; Yield: 134

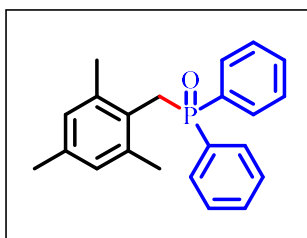

mg (80 %);  $^1\text{H NMR}$  (500 MHz, Chloroform-*d*)  $\delta$  7.67 – 7.64 (m, 4H), 7.53 – 7.50 (m, 2H), 7.44 – 7.41 (m, 4H), 6.77 (s, 2H), 3.71 (d,  $J=13.8$  Hz, 2H), 2.24 (s, 3H), 1.99 (s, 6H).  $^{13}\text{C NMR}$  (125 MHz,  $\text{CDCl}_3$ )  $\delta$  137.8 (d,  $J_{\text{C-P}}=4.6$  Hz), 136.2 (d,  $J_{\text{C-P}}=3.4$  Hz), 133.2 (d,  $J_{\text{C-P}}=96.3$  Hz), 131.9 (d,  $J_{\text{C-P}}=2.5$  Hz), 131.3 (d,  $J_{\text{C-P}}=8.9$  Hz), 129.2 (d,  $J_{\text{C-P}}=2.9$  Hz), 128.5 (d,  $J_{\text{C-P}}=11.4$  Hz), 125.6 (d,  $J_{\text{C-P}}=8.7$  Hz), 33.0 (d,  $J_{\text{C-P}}=66.5$  Hz), 21.0, 20.8.  $^{31}\text{P NMR}$  (200 MHz,  $\text{CDCl}_3$ )  $\delta$  28.7.

**(3,5-Difluorobenzyl)diphenylphosphine oxide (3r):** Isolated as white solid; Yield: 99 mg (60

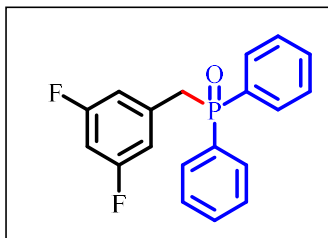

%);  $^1\text{H NMR}$  (500 MHz, Chloroform-*d*)  $\delta$  7.65 – 7.60 (m, 4H), 7.47 – 7.44 (m, 2H), 7.40 – 7.36 (m, 4H), 6.58 – 6.57 (m, 2H), 6.55 – 6.51 (m, 1H), 3.54 (d,  $J=13.5$  Hz, 2H).  $^{13}\text{C NMR}$  (125 MHz,  $\text{CDCl}_3$ )  $\delta$  162.8 (ddd,  $J_{\text{C-F}}=246.8$  Hz,  $J_{\text{C-F}}=12.8$  Hz,  $J_{\text{C-P}}=2.7$  Hz), 135.2 (m), 132.2 (d,  $J_{\text{C-P}}=2.7$  Hz), 131.8 (d,  $J_{\text{C-P}}=99.6$  Hz), 131.1 (d,  $J_{\text{C-P}}=9.2$  Hz), 128.8 (d,  $J_{\text{C-P}}=11.8$  Hz), 113.2 (dt,  $J_{\text{C-F}}=20.0$  Hz,  $J_{\text{C-F}}=5.5$  Hz), 102.6 (td,  $J_{\text{C-F}}=24.9$  Hz,  $J_{\text{C-P}}=2.9$  Hz), 38.3 (d,  $J_{\text{C-P}}=65.8$  Hz,  $J_{\text{C-F}}=1.8$  Hz).  $^{31}\text{P NMR}$  (200 MHz,  $\text{CDCl}_3$ )  $\delta$  28.7.  $^{19}\text{F NMR}$  (470 MHz,  $\text{CDCl}_3$ )  $\delta$  -109.9. HRMS (ESI+):  $m/z$  calcd.  $\text{C}_{19}\text{H}_{15}\text{F}_2\text{OP}$  For  $[\text{M}+\text{H}]^+$ : 329.0902; Found: 329.0880.

**(2,5-Difluorobenzyl)diphenylphosphine oxide(3s):** Isolated as white solid; Yield: 102 mg

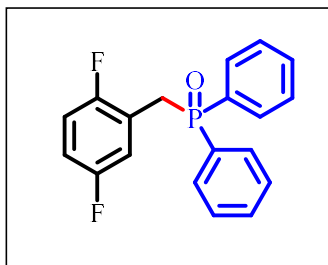

(62 %);  $^1\text{H NMR}$  (400 MHz, Chloroform-*d*)  $\delta$  7.75 – 7.70 (m, 4H), 7.54 – 7.49 (m, 2H), 7.47 – 7.42 (m, 4H), 7.18 – 7.13 (m, 1H), 6.85 – 6.81 (m, 2H), 3.66 (d,  $J = 13.6$  Hz, 2H).  $^{13}\text{C NMR}$  (125 MHz,  $\text{CDCl}_3$ )  $\delta$  158.4 (dt,  $J_{\text{C-F}} = 241.2$  Hz,  $J_{\text{C-F}} = 2.6$  Hz), 156.8 (ddd,  $J_{\text{C-F}} = 240.2$  Hz,  $J_{\text{C-F}} = 6.0$  Hz,  $J_{\text{C-F}} = 2.2$  Hz), 132.2 (d,  $J_{\text{C-P}} = 2.8$  Hz), 132.0 (d,  $J_{\text{C-P}} = 99.7$  Hz), 131.1 (d,  $J_{\text{C-P}} = 9.3$  Hz) 128.7 (d,  $J_{\text{C-P}} = 11.8$  Hz), 120.6 (dt,  $J_{\text{C-F}} = 17.9$  Hz,  $J_{\text{C-F}} = 7.9$  Hz), 118.56 (dt,  $J_{\text{C-F}} = 24.7$  Hz,  $J_{\text{C-F}} = 4.0$  Hz), 116.1 (ddd,  $J_{\text{C-F}} = 25.2$  Hz,  $J_{\text{C-F}} = 8.6$  Hz,  $J_{\text{C-P}} = 2.3$  Hz), 115.3 (ddd,  $J_{\text{C-F}} = 24.0$  Hz,  $J_{\text{C-F}} = 8.5$  Hz,  $J_{\text{C-P}} = 2.8$  Hz), 30.5 (d,  $J_{\text{C-P}} = 66.4$  Hz).  $^{31}\text{P NMR}$  (200 MHz,  $\text{CDCl}_3$ )  $\delta$  29.05.  $^{19}\text{F NMR}$  (470 MHz,  $\text{CDCl}_3$ )  $\delta$  -118.3 (dd,  $J_{\text{C-P}} = 17.4$  Hz,  $J_{\text{C-P}} = 1.4$  Hz), -123.1 (dd,  $J_{\text{C-P}} = 17.3$  Hz,  $J_{\text{C-P}} = 2.6$  Hz). **HRMS (ESI+):**  $m/z$  calcd.  $\text{C}_{19}\text{H}_{15}\text{F}_2\text{OP}$  For  $[\text{M}+\text{H}]^+$ : 329.0902; Found: 329.0880.

**Diphenyl(pyridin-2-ylmethyl)phosphine oxide(3t)<sup>9</sup>** Isolated as white solid; Yield: 81 mg (55 %)

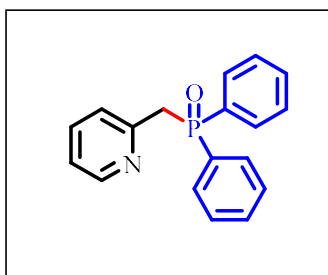

$^1\text{H NMR}$  (500 MHz, Chloroform-*d*)  $\delta$  8.38 – 8.37 (m, 1H), 7.77 – 7.3 (m, 4H), 7.56 – 7.53 (m, 1H), 7.50 – 7.47 (m, 3H), 7.44 – 7.41 (m, 4H), 7.08 – 7.06 (m, 1H), 3.94 (d,  $J = 14.1$  Hz, 2H).  $^{13}\text{C NMR}$  (125 MHz,  $\text{CDCl}_3$ )  $\delta$  152.6 (d,  $J_{\text{C-P}} = 7.2$  Hz), 149.3, 136.4 (d,  $J_{\text{C-P}} = 2.1$  Hz), 132.4 (d,  $J_{\text{C-P}} = 100$  Hz), 131.9 (d,  $J_{\text{C-P}} = 2.7$  Hz), 131.2 (d,  $J_{\text{C-P}} = 9.4$  Hz), 128.5 (d,  $J_{\text{C-P}} = 11.8$  Hz), 125.1 (d,  $J_{\text{C-P}} = 3.4$  Hz), 121.9 (d,  $J_{\text{C-P}} = 2.4$  Hz), 41.0 (d,  $J_{\text{C-P}} = 64.0$  Hz).  $^{31}\text{P NMR}$  (200 MHz,  $\text{CDCl}_3$ )  $\delta$  29.8.

**Diphenyl(thiophen-2-ylmethyl)phosphine oxide(3u)<sup>9</sup>** Isolated as white solid; Yield: 102 mg (68 %)

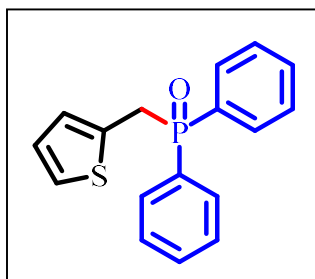

$^1\text{H NMR}$  (500 MHz, Chloroform-*d*)  $\delta$  7.74 – 7.70 (m, 4H), 7.53 – 7.50 (m, 2H), 7.46 – 7.43 (m, 4H), 7.08 – 7.07 (m, 1H), 6.86 – 6.83 (m, 2H), 3.79 (d,  $J = 13.1$  Hz, 2H).  $^{13}\text{C NMR}$  (125 MHz,  $\text{CDCl}_3$ )  $\delta$  132.0 (d,  $J_{\text{C-P}} = 2.8$  Hz), 131.9 (d,  $J_{\text{C-P}} = 8.6$  Hz), 131.8 (d,  $J_{\text{C-P}} = 99.1$  Hz), 131.2 (d,  $J_{\text{C-P}} = 9.1$  Hz), 128.6 (d,  $J_{\text{C-P}} = 11.8$  Hz), 127.9 (d,  $J_{\text{C-P}} = 6.4$  Hz), 127.1 (d,  $J_{\text{C-P}} = 2.8$  Hz), 124.9 (d,  $J_{\text{C-P}} = 3.1$  Hz), 32.6 (d,  $J_{\text{C-P}} = 68.3$  Hz).  $^{31}\text{P NMR}$  (200 MHz,  $\text{CDCl}_3$ )  $\delta$  28.5.

**(Furan-2-ylmethyl)diphenylphosphine oxide(3v):**<sup>9</sup> Isolated as white solid; Yield: 99 mg (70 %)

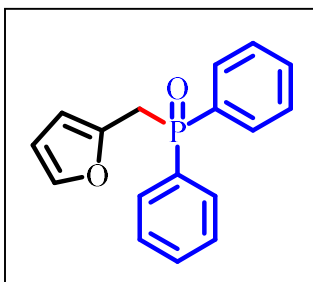

<sup>1</sup>H NMR (500 MHz, Chloroform-*d*) δ 7.72 – 7.68 (m, 4H), 7.55 – 7.52 (m, 2H), 7.47 – 7.44 (m, 4H), 7.24 (s, 1H), 6.24 (s, 1H), 6.09 (s, 1H), 3.76 (d, *J* = 14.0 Hz, 2H). <sup>13</sup>C NMR (125 MHz, CDCl<sub>3</sub>) δ 145.4 (d, *J*<sub>C-P</sub> = 7.9 Hz), 142.1 (d, *J*<sub>C-P</sub> = 2.9 Hz), 132.1 (d, *J*<sub>C-P</sub> = 2.9 Hz), 132.1 (d, *J*<sub>C-P</sub> = 100 Hz), 131.2 (d, *J*<sub>C-P</sub> = 9.3 Hz), 128.7 (d, *J*<sub>C-P</sub> = 11.7 Hz), 111.0 (d, *J*<sub>C-P</sub> = 2.7 Hz), 109.2 (d, *J*<sub>C-P</sub> = 5.9 Hz), 31.5 (d, *J*<sub>C-P</sub> = 68.9 Hz). <sup>31</sup>P NMR (200 MHz, CDCl<sub>3</sub>) δ 28.3.

**(3-Phenoxybenzyl)diphenylphosphine oxide(3x):** Isolated as white solid; Yield: 150 mg (78 %)

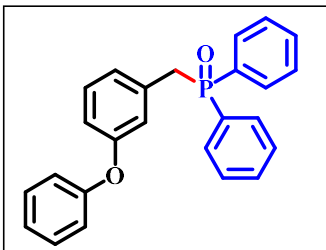

<sup>1</sup>H NMR (500 MHz, Chloroform-*d*) δ 7.70 – 7.66 (m, 4H), 7.52 – 7.49 (m, 2H), 7.44 – 7.41 (m, 4H), 7.28 – 7.24 (m, 2H), 7.18 (t, *J* = 8.0 Hz, 1H), 7.06 (t, *J* = 7.5 Hz, 1H), 6.97 (d, *J* = 7.6 Hz, 1H), 6.83 – 6.80 (m, 3H), 6.65 (s, 1H), 3.62 (d, *J* = 13.7 Hz, 2H). <sup>13</sup>C NMR (125 MHz, CDCl<sub>3</sub>) δ 157.14, 157.1 (d, *J*<sub>C-P</sub> = 2.7 Hz), 133.1 (d, *J*<sub>C-P</sub> = 7.8 Hz), 132.3 (d, *J*<sub>C-P</sub> = 98.7 Hz), 131.9 (d, *J*<sub>C-P</sub> = 2.8 Hz), 131.2 (d, *J*<sub>C-P</sub> = 9.0 Hz), 129.8 (d, *J*<sub>C-P</sub> = 2.6 Hz), 129.7, 128.6 (d, *J*<sub>C-P</sub> = 11.7 Hz), 125.3 (d, *J*<sub>C-P</sub> = 5.0 Hz), 123.2, 120.6 (d, *J*<sub>C-P</sub> = 5.4 Hz), 118.9, 117.6 (d, *J*<sub>C-P</sub> = 2.9 Hz), 38.2 (d, *J*<sub>C-P</sub> = 65.8 Hz). <sup>31</sup>P NMR (200 MHz, CDCl<sub>3</sub>) δ 29.36. HRMS (ESI<sup>+</sup>): *m/z* calcd. C<sub>25</sub>H<sub>21</sub>O<sub>2</sub>P For [M+H]<sup>+</sup>: 385.1352; Found: 385.1344.

**(Benzo[d][1,3]dioxol-5-ylmethyl)diphenylphosphino oxide(3y):**<sup>9</sup> Isolated as white solid; Yield: 118 mg (70 %)

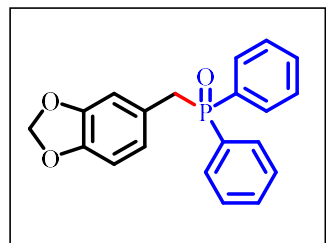

<sup>1</sup>H NMR (500 MHz, Chloroform-*d*) δ 7.71 – 7.68 (m, 4H), 7.53 – 7.50 (m, 2H), 7.46 – 7.43 (m, 4H), 6.64 – 6.61 (m, 2H), 6.52 (d, *J* = 7.9 Hz, 1H), 5.88 (s, 2H), 3.57 (d, *J* = 13.3 Hz, 2H). <sup>13</sup>C NMR (125 MHz, CDCl<sub>3</sub>) δ 147.6 (d, *J*<sub>C-P</sub> = 2.4 Hz), 146.6 (d, *J*<sub>C-P</sub> = 2.9 Hz), 132.8, 131.9 (d, *J*<sub>C-P</sub> = 3.0 Hz), 131.2 (d, *J*<sub>C-P</sub> = 9.0 Hz), 128.6 (d, *J*<sub>C-P</sub> = 11.5 Hz), 124.5 (d, *J*<sub>C-P</sub> = 8.1 Hz), 123.4 (d, *J*<sub>C-P</sub> = 6.0 Hz), 110.6 (d, *J*<sub>C-P</sub> = 4.7 Hz), 108.3 (d, *J*<sub>C-P</sub> = 2.7 Hz), 101.0, 37.8 (d, *J*<sub>C-P</sub> = 67.1 Hz). <sup>31</sup>P NMR (200 MHz, CDCl<sub>3</sub>) δ 29.4.

**([1,1'-Biphenyl]-4-ylmethyl)diphenylphosphine oxide(3z):**<sup>7</sup> Isolated as white solid; Yield:

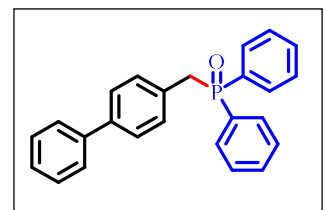

174 mg (95 %) <sup>1</sup>H NMR (500 MHz, Chloroform-*d*) δ 7.74 – 7.70 (m, 4H), 7.54 – 7.50 (m, 4H), 7.46 – 7.39 (m, 8H), 7.31 (t, *J* = 7.3 Hz, 1H), 7.17 (d, *J* = 7.7 Hz, 2H), 3.70 (d, *J* = 13.6 Hz, 2H). <sup>13</sup>C NMR (125 MHz, CDCl<sub>3</sub>) δ 140.8 (d, *J*<sub>C-P</sub> = 1.2 Hz), 139.7 (d, *J*<sub>C-P</sub> = 3.0 Hz), 132.4 (d, *J*<sub>C-P</sub> = 98.5 Hz), 132.0 (d, *J*<sub>C-P</sub> = 2.8 Hz), 131.3 (d, *J*<sub>C-P</sub> = 9.0 Hz), 130.6 (d, *J*<sub>C-P</sub> = 5.2 Hz), 130.3 (d, *J*<sub>C-P</sub> = 8 Hz), 128.9, 128.7 (d, *J*<sub>C-P</sub> = 11.6 Hz), 127.4, 127.2 (d, *J*<sub>C-P</sub> = 2.6 Hz), 127.1, 37.9 (d, *J*<sub>C-P</sub> = 65.8 Hz). <sup>31</sup>P NMR (200 MHz, CDCl<sub>3</sub>) δ 29.5.

**(Naphthalen-1-ylmethyl)diphenylphosphine oxide(3aa):**<sup>8</sup> Isolated as white solid; Yield:

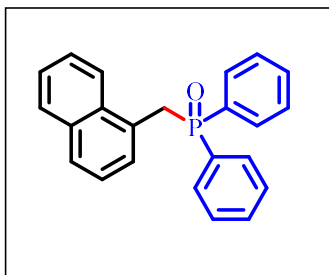

141 mg (82 %) <sup>1</sup>H NMR (500 MHz, Chloroform-*d*) δ 7.92 (d, *J* = 8.2 Hz, 1H), 7.76 (d, *J* = 7.8 Hz, 1H), 7.70 – 7.66 (m, 5H), 7.47 – 7.44 (m, 2H), 7.40 – 7.34 (m, 6H), 7.25 – 7.22 (m, 2H), 4.11 (d, *J* = 13.9 Hz, 2H). <sup>13</sup>C NMR (125 MHz, CDCl<sub>3</sub>) δ 133.8 (d, *J*<sub>C-P</sub> = 1.9 Hz), 132.5 (d, *J*<sub>C-P</sub> = 4.3 Hz), 132.4 (d, *J*<sub>C-P</sub> = 98.3 Hz), 131.8 (d, *J*<sub>C-P</sub> = 2.6 Hz), 131.2 (d, *J*<sub>C-P</sub> = 9 Hz), 128.7 (d, *J*<sub>C-P</sub> = 6.1 Hz), 128.6, 128.5, 127.8 (d, *J*<sub>C-P</sub> = 8.2 Hz), 127.7 (d, *J*<sub>C-P</sub> = 3.1 Hz), 126.0, 125.6, 125.1 (d, *J*<sub>C-P</sub> = 3.0 Hz), 124.4, 35.0 (d, *J*<sub>C-P</sub> = 66.5 Hz). <sup>31</sup>P NMR (200 MHz, CDCl<sub>3</sub>) δ 29.5.

**(Naphthalen-2-ylmethyl)diphenylphosphine oxide(3ab)**<sup>7</sup> Isolated as white solid; Yield:

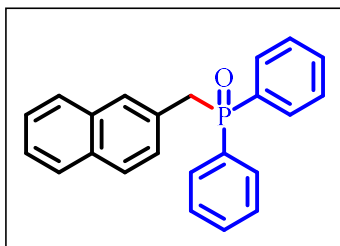

137 mg (80 %) <sup>1</sup>H NMR (500 MHz, Chloroform-*d*) δ 7.75 – 7.71 (m, 5H), 7.66 – 7.65 (m, 2H), 7.56 (s, 1H), 7.51 – 7.48 (m, 2H), 7.43 – 7.40 (m, 6H), 7.25 – 7.22 (m, 1H), 3.81 (d, *J* = 13.8 Hz, 2H). <sup>13</sup>C NMR (125 MHz, CDCl<sub>3</sub>) δ 133.4 (d, *J*<sub>C-P</sub> = 2.4 Hz), 133.4 (d, *J*<sub>C-P</sub> = 99.0 Hz), 132.3 (d, *J*<sub>C-P</sub> = 2.0 Hz), 131.9 (d, *J*<sub>C-P</sub> = 2.7 Hz), 131.3 (d, *J*<sub>C-P</sub> = 9.0 Hz), 129.1 (d, *J*<sub>C-P</sub> = 6.7 Hz), 128.8 (d, *J*<sub>C-P</sub> = 7.9 Hz), 128.6 (d, *J*<sub>C-P</sub> = 11.7 Hz), 128.3 (d, *J*<sub>C-P</sub> = 4.2 Hz), 128.0 (d, *J*<sub>C-P</sub> = 1.8 Hz), 127.75, 127.7, 126.1, 125.8, 38.8 (d, *J*<sub>C-P</sub> = 66.2 Hz). <sup>31</sup>P NMR (200 MHz, CDCl<sub>3</sub>) δ 29.4.

**((9H-Fluoren-9-yl)methyl)diphenylphosphine oxide(3ac):**<sup>7</sup> Isolated as white solid; Yield:

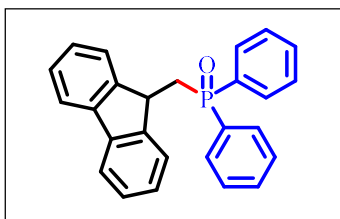

152 mg (80 %) <sup>1</sup>H NMR (400 MHz, Chloroform-*d*) δ 7.85 – 7.80 (m, 4H), 7.62 (d, *J* = 7.5 Hz, 4H), 7.45 – 7.39 (m, 6H), 7.26 (t, *J* = 7.4 Hz, 2H), 7.20 – 7.17 (m, 2H), 4.27-4.20 (m, 1H), 2.80 – 2.74 (m, 2H). <sup>13</sup>C NMR (125 MHz, CDCl<sub>3</sub>) δ 147.0 (d, *J*<sub>C-P</sub> = 6.8 Hz), 140.3, 133.5, 132.7, 131.7 (d, *J*<sub>C-P</sub> = 2.7 Hz), 130.8 (d, *J*<sub>C-P</sub> = 9.0 Hz), 128.7 (d, *J*<sub>C-P</sub> = 11.4 Hz), 127.2 (d, *J*<sub>C-P</sub> = 10.8 Hz), 125.3, 119.6, 40.8 (d, *J*<sub>C-P</sub> = 3.8 Hz), 34.5 (d, *J*<sub>C-P</sub> = 69.8 Hz). <sup>31</sup>P NMR (200 MHz, CDCl<sub>3</sub>) δ 30.8.

**Octadecyldiphenylphosphine oxide(3ad)** Isolated as white solid; Yield: 205 mg (90 %) <sup>1</sup>H

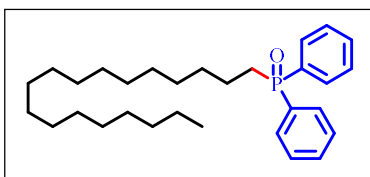

NMR (400 MHz, Chloroform-*d*) δ 7.74 – 7.70 (m, 4H), 7.51 – 7.42 (m, 6H), 2.27 – 2.20 (m, 2H), 1.65 – 1.55 (m, 2H), 1.40 – 1.33 (m, 2H), 1.27 – 1.20 (m, 28H), 0.86 (t, *J* = 6.3 Hz, 3H). <sup>13</sup>C NMR (125 MHz, CDCl<sub>3</sub>) δ 133.3 (d, *J*<sub>C-P</sub> = 97.3 Hz), 131.7 (d, *J*<sub>C-P</sub> = 2.3 Hz), 130.9 (d, *J*<sub>C-P</sub> = 9.2 Hz), 128.7 (d, *J*<sub>C-P</sub> = 11.4 Hz), 32.0, 31.5, 31.1 (d, *J*<sub>C-P</sub> = 14.5 Hz), 30.3, 29.84 (d, *J*<sub>C-P</sub> = 71.6 Hz), 29.8, 29.78, 29.76, 29.71, 29.7, 29.5, 29.2, 22.8, 21.5 (d, *J*<sub>C-P</sub> = 3.8 Hz), 14.2. <sup>31</sup>P NMR (200 MHz, CDCl<sub>3</sub>) δ 32.7. HRMS (ESI<sup>+</sup>): *m/z* calcd. C<sub>30</sub>H<sub>47</sub>OP For [M+H]<sup>+</sup>: 455.3438; Found: 455.3411.

**Hexadecyldiphenylphosphine oxide(3ae):** Isolated as white solid; Yield: 192 mg (90 %) <sup>1</sup>H

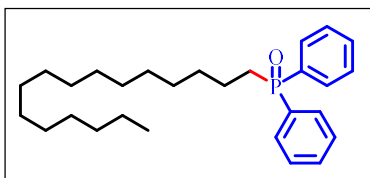

NMR (400 MHz, Chloroform-*d*) δ 7.75 – 7.71 (m, 4H), 7.52 – 7.44 (m, 6H), 2.28 – 2.21 (m, 2H), 1.66 – 1.56 (m, 2H), 1.41 – 1.34 (m, 2H), 1.28 – 1.21 (m, 24H), 0.87 (t, *J* = 6.4 Hz, 3H). <sup>13</sup>C NMR (125 MHz, CDCl<sub>3</sub>) δ 133.3 (d, *J*<sub>C-P</sub> = 97.4 Hz), 131.7 (d, *J*<sub>C-P</sub> = 2.5 Hz), 130.8 (d, *J*<sub>C-P</sub> = 9.1 Hz), 128.7 (d,

$J_{C-P} = 11.4$  Hz), 32.0, 31.1 (d,  $J_{C-P} = 14.5$  Hz), 29.86 (d,  $J_{C-P} = 71.6$  Hz) 29.81, 29.80, 29.78, 29.77, 29.72, 29.67, 29.5, 29.2, 22.8, 21.5 (d,  $J_{C-P} = 3.7$  Hz), 14.2.  $^{31}\text{P}$  NMR (200 MHz,  $\text{CDCl}_3$ )  $\delta$  32.7. HRMS (ESI+):  $m/z$  calcd.  $\text{C}_{28}\text{H}_{43}\text{OP}$  For  $[\text{M}+\text{H}]^+$ : 427.3125; Found: 427.3096.

**Diphenyl(tetradecyl)phosphine oxide(3af):** Isolated as white solid; Yield: 176 mg (88 %)

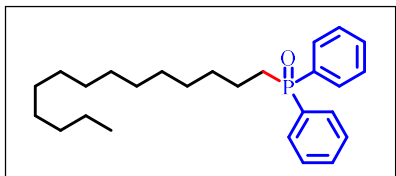

$^1\text{H}$  NMR (400 MHz, Chloroform-*d*)  $\delta$  7.75 – 7.70 (m, 4H), 7.54 – 7.43 (m, 6H), 2.28 – 2.21 (m, 2H), 1.66 – 1.56 (m, 2H), 1.41 – 1.36 (m, 2H), 1.28 – 1.21 (m, 20H), 0.87 (t,  $J = 6.3$  Hz, 3H).  $^{13}\text{C}$  NMR (125 MHz,  $\text{CDCl}_3$ )  $\delta$  133.3 (d,  $J_{C-P} = 96.9$  Hz), 131.7 (d,  $J_{C-P} = 2.5$  Hz), 130.9 (d,  $J_{C-P} = 9.0$  Hz), 128.7 (d,  $J_{C-P} = 11.4$  Hz), 32.0, 31.1 (d,  $J_{C-P} = 14.4$  Hz), 29.8 (d,  $J_{C-P} = 71.6$  Hz), 29.8, 29.77, 29.73, 29.68, 29.49, 29.48, 29.2, 22.8, 21.5 (d,  $J_{C-P} = 3.8$  Hz), 14.2.  $^{31}\text{P}$  NMR (162 MHz,  $\text{CDCl}_3$ )  $\delta$  32.6. HRMS (ESI+):  $m/z$  calcd.  $\text{C}_{26}\text{H}_{39}\text{OP}$  For  $[\text{M}+\text{H}]^+$ : 399.2812; Found: 399.2785.

**Dodecyldiphenylphosphine oxide(3ag):** Isolated as white solid; Yield: 160 mg (86 %)

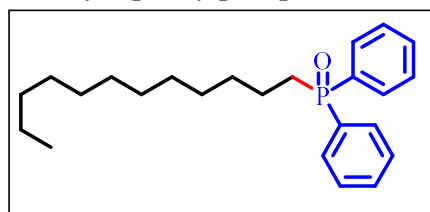

$^1\text{H}$  NMR (500 MHz, Chloroform-*d*)  $\delta$  7.75 – 7.71 (m, 4H), 7.52 – 7.49 (m, 2H), 7.47 – 7.44 (m, 4H), 2.27 – 2.22 (m, 2H), 1.65 – 1.57 (m, 2H), 1.40 – 1.35 (m, 2H), 1.27 – 1.21 (m, 16H), 0.87 (t,  $J = 6.6$  Hz, 3H).  $^{13}\text{C}$  NMR (125 MHz,  $\text{CDCl}_3$ )  $\delta$  133.3 (d,  $J_{C-P} = 97.2$  Hz), 131.7 (d,  $J_{C-P} = 2.3$  Hz), 130.8 (d,  $J_{C-P} = 9.1$  Hz), 128.7 (d,  $J_{C-P} = 11.4$  Hz), 32.0, 31.1 (d,  $J_{C-P} = 14.5$  Hz), 29.8 (d,  $J_{C-P} = 71.2$  Hz), 29.7, 29.6, 29.5, 29.4, 29.2, 22.80, 21.5 (d,  $J_{C-P} = 3.6$  Hz), 14.2.  $^{31}\text{P}$  NMR (200 MHz,  $\text{CDCl}_3$ )  $\delta$  32.8. HRMS (ESI+):  $m/z$  calcd.  $\text{C}_{24}\text{H}_{35}\text{OP}$  For  $[\text{M}+\text{H}]^+$ : 371.2499; Found: 371.2480.

**Decyldiphenylphosphine oxide(3ah):**<sup>16</sup> Isolated as white solid; Yield: 144 mg (84 %)

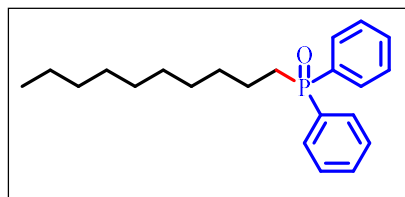

$^1\text{H}$  NMR (400 MHz, Chloroform-*d*)  $\delta$  7.74 – 7.69 (m, 4H), 7.51 – 7.41 (m, 6H), 2.27 – 2.20 (m, 2H), 1.65 – 1.53 (m, 2H), 1.40 – 1.33 (m, 2H), 1.26 – 1.20 (m, 12H), 0.85 (t,  $J = 6.7$  Hz, 3H).  $^{13}\text{C}$  NMR (125 MHz,  $\text{CDCl}_3$ )  $\delta$  133.3 (d,  $J_{C-P} = 97.1$  Hz), 131.7 (d,  $J_{C-P} = 2.6$  Hz), 130.8 (d,  $J_{C-P} = 9.1$  Hz), 128.7 (d,  $J_{C-P} = 11.4$  Hz), 31.9, 31.1 (d,  $J_{C-P} = 14.5$  Hz), 29.8 (d,  $J_{C-P} = 71.5$  Hz), 29.6, 29.4, 29.3, 29.1, 22.7, 21.5 (d,  $J_{C-P} = 3.8$  Hz), 14.2.  $^{31}\text{P}$  NMR (200 MHz,  $\text{CDCl}_3$ )  $\delta$  32.7.

**Nonyldiphenylphosphine oxide(3ai):**<sup>15</sup> Isolated as white solid; Yield: 135 mg (82 %)

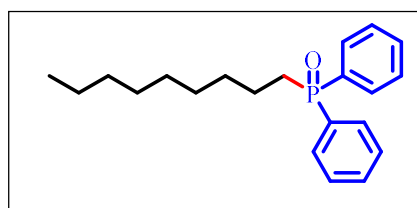

$^1\text{H}$  NMR (500 MHz, Chloroform-*d*)  $\delta$  7.74 – 7.70 (m, 4H), 7.51 – 7.48 (m, 2H), 7.46 – 7.43 (m, 4H), 2.27 – 2.21 (m, 2H), 1.64 – 1.54 (m, 2H), 1.40 – 1.34 (m, 2H), 1.27 – 1.20 (m, 10H), 0.85 (t,  $J = 7.2$  Hz, 3H).  $^{13}\text{C}$  NMR (125 MHz,  $\text{CDCl}_3$ )  $\delta$  133.2 (d,  $J_{C-P} = 97.2$  Hz), 131.7 (d,  $J_{C-P} = 2.6$  Hz), 130.8 (d,  $J_{C-P} = 9.1$  Hz), 128.7 (d,  $J_{C-P} = 11.5$  Hz), 31.9, 31.1 (d,  $J_{C-P} = 14.7$  Hz), 29.8 (d,  $J_{C-P} = 71.6$  Hz), 29.4, 29.3, 29.2, 22.7, 21.5 (d,  $J_{C-P} = 4.0$  Hz), 14.2.  $^{31}\text{P}$  NMR (200 MHz,  $\text{CDCl}_3$ )  $\delta$  32.9.

**Octyldiphenylphosphine oxide(3aj):**<sup>15</sup> Isolated as white solid; Yield: 123 mg (78 %) <sup>1</sup>H

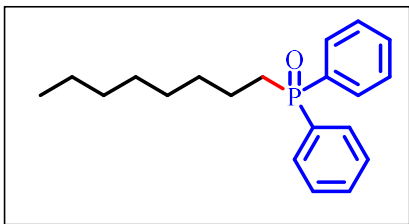

**NMR (500 MHz, Chloroform-*d*)**  $\delta$  7.72 – 7.69 (m, 4H), 7.50 – 7.47 (m, 2H), 7.45 – 7.42 (m, 4H), 2.26 – 2.20 (m, 2H), 1.62 – 1.54 (m, 2H), 1.39 – 1.33 (m, 2H), 1.23 – 1.19 (m, 8H), 0.83 (t,  $J = 6.8$  Hz, 3H). **<sup>13</sup>C NMR (125 MHz, CDCl<sub>3</sub>)**  $\delta$  133.15 (d,  $J_{C-P} = 97.3$  Hz), 131.7 (d,  $J_{C-P} = 2.3$  Hz), 130.8 (d,  $J_{C-P} = 9.0$  Hz), 128.7 (d,  $J_{C-P} = 11.4$  Hz), 31.8, 31.0 (d,  $J_{C-P} = 14.5$  Hz), 29.8 (d,  $J_{C-P} = 71.2$  Hz), 29.76, 29.0, 22.7, 21.4 (d,  $J_{C-P} = 3.6$  Hz), 14.1. **<sup>31</sup>P NMR (200 MHz, CDCl<sub>3</sub>)**  $\delta$  32.8.

**Heptyldiphenylphosphine oxide(3ak):**<sup>15</sup> Isolated as white solid; Yield: 108 mg (72 %) <sup>1</sup>H

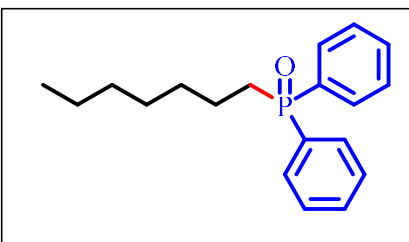

**NMR (400 MHz, Chloroform-*d*)**  $\delta$  7.76 – 7.70 (m, 4H), 7.53 – 7.49 (m, 2H), 7.48 – 7.43 (m, 4H), 2.28 – 2.21 (m, 2H), 1.66 – 1.56 (m, 2H), 1.42 – 1.34 (m, 2H), 1.28 – 1.21 (m, 6H), 0.84 (t,  $J = 6.6$  Hz, 3H). **<sup>13</sup>C NMR (125 MHz, CDCl<sub>3</sub>)**  $\delta$  133.3 (d,  $J_{C-P} = 97.0$  Hz), 131.7 (d,  $J_{C-P} = 2.6$  Hz), 130.9 (d,  $J_{C-P} = 9.1$  Hz), 128.7 (d,  $J_{C-P} = 11.4$  Hz), 31.7, 31.1 (d,  $J_{C-P} = 14.5$  Hz), 30.4 (d,  $J_{C-P} = 71.5$  Hz), 28.9, 22.7, 21.5 (d,  $J_{C-P} = 3.8$  Hz), 14.1. **<sup>31</sup>P NMR (200**

**MHz, CDCl<sub>3</sub>)**  $\delta$  32.7.

**Hexyldiphenylphosphine oxide(3al):**<sup>10</sup> Isolated as white solid; Yield: 93 mg (65 %) <sup>1</sup>H NMR

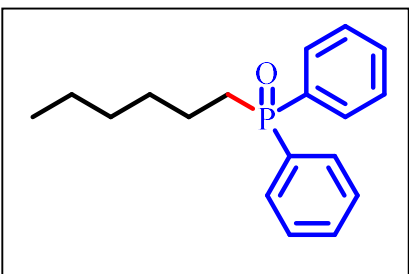

**(400 MHz, Chloroform-*d*)**  $\delta$  7.76 – 7.70 (m, 4H), 7.53 – 7.49 (m, 2H), 7.48 – 7.43 (m, 4H), 2.29 – 2.22 (m, 2H), 1.64 – 1.57 (m, 2H), 1.42 – 1.35 (m, 2H), 1.26 – 1.23 (m, 4H), 0.84 (t,  $J = 6.8$  Hz, 3H). **<sup>13</sup>C NMR (125 MHz, CDCl<sub>3</sub>)**  $\delta$  133.2 (d,  $J_{C-P} = 97.1$  Hz), 131.7 (d,  $J_{C-P} = 2.7$  Hz), 130.9 (d,  $J_{C-P} = 9.1$  Hz), 128.7 (d,  $J_{C-P} = 11.4$  Hz), 31.4, 30.8 (d,  $J_{C-P} = 14.5$  Hz), 29.8 (d,  $J_{C-P} = 71.5$  Hz), 22.5, 21.5 (d,  $J_{C-P} = 3.9$  Hz), 14.1. **<sup>31</sup>P NMR (200 MHz, CDCl<sub>3</sub>)**  $\delta$  32.7.

**Pentyldiphenylphosphine oxide(3am):**<sup>15</sup> Isolated as white solid; Yield: 85 mg (62 %) <sup>1</sup>H

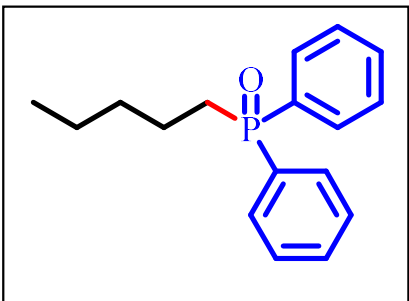

**NMR (500 MHz, Chloroform-*d*)**  $\delta$  7.74 – 7.70 (m, 4H), 7.51 – 7.48 (m, 2H), 7.46 – 7.43 (m, 4H), 2.26 – 2.21 (m, 2H), 1.64 – 1.58 (m, 2H), 1.39 – 1.35 (m, 2H), 1.27 – 1.24 (m, 3H), 0.83 (t,  $J = 7.2$  Hz, 3H). **<sup>13</sup>C NMR (125 MHz, CDCl<sub>3</sub>)**  $\delta$  133.2 (d,  $J_{C-P} = 97.3$  Hz), 131.7 (d,  $J_{C-P} = 2.5$  Hz), 130.8 (d,  $J_{C-P} = 9.1$  Hz), 128.7 (d,  $J_{C-P} = 11.4$  Hz), 33.2 (d,  $J_{C-P} = 14.5$  Hz), 29.8 (d,  $J_{C-P} = 71.2$  Hz), 22.2, 21.2 (d,  $J_{C-P} = 3.8$  Hz), 13.9. **<sup>31</sup>P NMR (200 MHz, CDCl<sub>3</sub>)**  $\delta$  32.8.

**Butyldiphenylphosphine oxide(3an):**<sup>17</sup> Isolated as white solid; Yield: 71 mg (55 %) <sup>1</sup>H

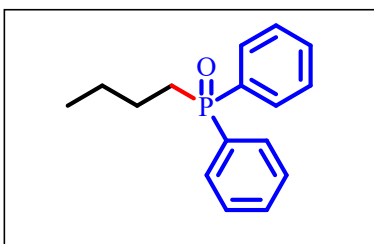

NMR (500 MHz, Chloroform-*d*)  $\delta$  7.74 – 7.71 (m, 4H), 7.53 – 7.49 (m, 2H), 7.47 – 7.44 (m, 4H), 2.28 – 2.23 (m, 2H), 1.63 – 1.53 (m, 2H), 1.44 – 1.39 (m, 2H), 0.88 (t,  $J$  = 7.5 Hz, 3H). <sup>13</sup>C NMR (125 MHz, CDCl<sub>3</sub>)  $\delta$  133.1 (d,  $J_{C-P}$  = 97.3 Hz), 131.7 (d,  $J_{C-P}$  = 2.6 Hz), 130.9 (d,  $J_{C-P}$  = 9.2 Hz), 128.7 (d,  $J_{C-P}$  = 11.4 Hz), 29.5 (d,  $J_{C-P}$  = 68.9 Hz), 24.2 (d,  $J_{C-P}$  = 14.8 Hz), 23.5 (d,  $J_{C-P}$  = 3.8 Hz), 13.7. <sup>31</sup>P NMR (200 MHz, CDCl<sub>3</sub>)  $\delta$  33.0.

**(4-Bromophenethyl)diphenylphosphino oxide (3ao):**<sup>13</sup> Isolated as white solid; Yield: 135

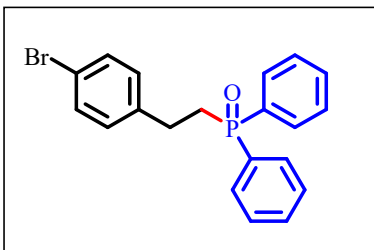

mg (70 %) <sup>1</sup>H NMR (500 MHz, Chloroform-*d*)  $\delta$  7.76 – 7.72 (m, 4H), 7.53 – 7.51 (m, 2H), 7.48 – 7.47 (m, 4H), 7.35 – 7.34 (m, 2H), 7.03 – 7.01 (m, 2H), 2.89 – 2.87 (m, 2H), 2.56 – 2.53 (m, 2H). <sup>13</sup>C NMR (125 MHz, CDCl<sub>3</sub>)  $\delta$  140.2 (d,  $J_{C-P}$  = 14.2 Hz), 132.7, 132.0, 131.7, 130.9 (d,  $J_{C-P}$  = 7.8 Hz), 130.0, 128.9 (d,  $J_{C-P}$  = 10.7 Hz), 120.2, 31.8 (d,  $J_{C-P}$  = 68.9 Hz), 27.2. <sup>31</sup>P NMR (200 MHz, CDCl<sub>3</sub>)  $\delta$  31.6.

**Phenethyldiphenylphosphine oxide(3ap):**<sup>7</sup> Isolated as white solid; Yield: 138 mg (90 %) <sup>1</sup>H

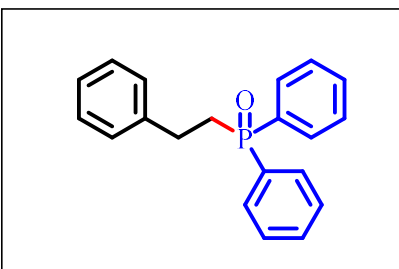

NMR (500 MHz, Chloroform-*d*)  $\delta$  7.78 – 7.75 (m, 4H), 7.54 – 7.51 (m, 2H), 7.49 – 7.46 (m, 4H), 7.26 – 7.24 (m, 2H), 7.19 – 7.15 (m, 3H), 2.95 – 2.90 (m, 2H), 2.61 – 2.55 (m, 2H). <sup>13</sup>C NMR (125 MHz, CDCl<sub>3</sub>)  $\delta$  141.2 (d,  $J_{C-P}$  = 15.2 Hz), 132.8 (d,  $J_{C-P}$  = 97.7 Hz), 131.95 (d,  $J_{C-P}$  = 2.6 Hz), 130.9 (d,  $J_{C-P}$  = 9.2 Hz), 128.8 (d,  $J_{C-P}$  = 11.6 Hz), 128.7, 128.2, 126.4, 32.0 (d,  $J_{C-P}$  = 69.3 Hz), 27.6 (d,  $J_{C-P}$  = 2.9 Hz). <sup>31</sup>P NMR (200 MHz, CDCl<sub>3</sub>)  $\delta$  31.8.

**Diphenyl((4-(prop-1-en-2-yl)cyclohex-1-en-1-yl)methyl)phosphine oxide(3aq):**<sup>10</sup> Isolated as white solid; Yield: 110 mg (65 %) <sup>1</sup>H NMR (500 MHz, Chloroform-*d*)  $\delta$  7.77 – 7.72 (m, 4H), 7.52 – 7.49 (m, 2H), 7.47 – 7.43 (m, 4H), 5.44 – 5.42 (m, 1H), 4.60 (d,  $J$  = 25.1 Hz, 2H), 3.03 (d,  $J$  = 13.6 Hz, 2H), 2.07 – 1.98 (m, 4H), 1.85 – 1.83 (m, 1H), 1.72 – 1.68 (m, 1H), 1.67 (s, 3H), 1.39 – 1.31 (m, 1H). <sup>13</sup>C NMR (125 MHz, CDCl<sub>3</sub>)  $\delta$  149.8, 133.6 (d,  $J_{C-P}$  = 17.8 Hz), 132.8 (d,  $J_{C-P}$  = 17.3 Hz), 131.7, 131.16, 131.15 (d,  $J_{C-P}$  = 18.8 Hz), 128.5 (d,  $J_{C-P}$  = 11.5 Hz), 128.1

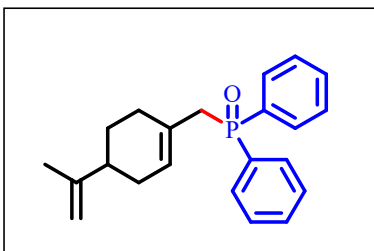

(d,  $J_{C-P}$  = 9.2 Hz), 127.1 (d,  $J_{C-P}$  = 10.0 Hz), 108.7, 40.4, 39.4 (d,  $J_{C-P}$  = 67.6 Hz), 31.0 (d,  $J_{C-P}$  = 2.2 Hz), 30.8 (d,  $J_{C-P}$  = 2.3 Hz), 27.8, 20.9. <sup>31</sup>P NMR (200 MHz, CDCl<sub>3</sub>)  $\delta$  29.7.

**(4-(((1R,2S,5R)-2-Isopropyl-5-methylcyclohexyl)oxy)benzyl)diphenylphosphine**

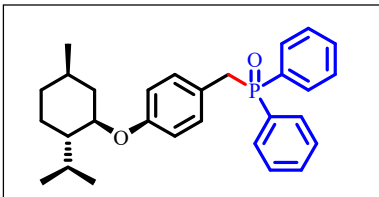

**oxide(3ar)** Isolated as white solid; Yield: 125 mg (70 %)  $^1\text{H NMR}$  (500 MHz, Chloroform-*d*)  $\delta$  7.70 – 7.66 (m, 4H), 7.51 – 7.48 (m, 2H), 7.44 – 7.41 (m, 4H), 6.98 – 6.97 (m, 2H), 6.72 – 6.70 (m, 2H), 4.52 – 4.48 (m, 1H), 3.58 (d,  $J$  = 13.2 Hz, 2H), 2.02 (d,  $J$  = 14.2 Hz, 1H), 1.76 – 1.61 (m, 4H), 1.53 (q,  $J$  = 12.8 Hz, 1H), 1.02 – 0.97 (m, 1H), 0.94 – 0.86 (m, 5H), 0.83 – 0.79 (m, 6H).  $^{13}\text{C NMR}$  (125 MHz,  $\text{CDCl}_3$ )  $\delta$  157.4 (d,  $J_{\text{C-P}}$  = 2.8 Hz), 132.6 (d,  $J_{\text{C-P}}$  = 97.7 Hz), 131.8 (d,  $J_{\text{C-P}}$  = 2.7 Hz), 131.3 (d,  $J_{\text{C-P}}$  = 9.0 Hz), 131.2 (d,  $J_{\text{C-P}}$  = 5.1 Hz), 128.5 (d,  $J_{\text{C-P}}$  = 11.4 Hz), 122.3 (d,  $J_{\text{C-P}}$  = 8.1 Hz), 115.9 (d,  $J_{\text{C-P}}$  = 2.3 Hz), 47.9, 37.8, 37.2 (d,  $J_{\text{C-P}}$  = 67.2 Hz), 35.1, 29.3, 26.2, 24.9, 22.4, 21.1, 20.9.  $^{31}\text{P NMR}$  (200 MHz,  $\text{CDCl}_3$ )  $\delta$  29.7. **HRMS (ESI+):**  $m/z$  calcd.  $\text{C}_{29}\text{H}_{35}\text{O}_2\text{P}$  For  $[\text{M}+\text{H}]^+$ : 447.2448; Found: 447.2418.

**(3,7-Dimethyloct-6-en-1-yl)diphenylphosphine oxide(3as)** Isolated as white solid; Yield:

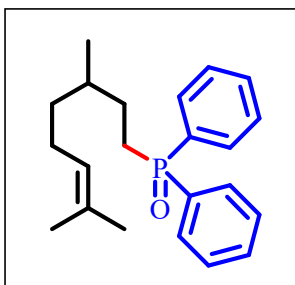

102 mg (60 %)  $^1\text{H NMR}$  (500 MHz, Chloroform-*d*)  $\delta$  7.73 – 7.69 (m, 4H), 7.50 – 7.47 (m, 2H), 7.46 – 7.42 (m, 4H), 5.04 (t,  $J$  = 7.3 Hz, 1H), 2.27 – 2.17 (m, 2H), 1.95 – 1.83 (m, 2H), 1.63 (s, 3H), 1.53 (s, 3H), 1.48 – 1.41 (m, 2H), 1.32 – 1.26 (m, 2H), 1.15 – 1.07 (m, 1H), 0.89 (d,  $J$  = 6.3 Hz, 3H).  $^{13}\text{C NMR}$  (125 MHz,  $\text{CDCl}_3$ )  $\delta$  133.6 (d,  $J_{\text{C-P}}$  = 6.9 Hz), 132.8 (d,  $J_{\text{C-P}}$  = 6.8 Hz), 131.7 (d,  $J_{\text{C-P}}$  = 2.7 Hz), 130.8 (d,  $J_{\text{C-P}}$  = 9.1 Hz), 128.7 (d,  $J_{\text{C-P}}$  = 11.4 Hz), 124.6, 36.4, 33.4 (d,  $J_{\text{C-P}}$  = 14.1 Hz), 29.8, 28.0 (d,  $J_{\text{C-P}}$  = 3.7 Hz), 27.3 (d,  $J_{\text{C-P}}$  = 71.8 Hz), 25.6 (d,  $J_{\text{C-P}}$  = 40.1 Hz), 19.1, 17.7.  $^{31}\text{P NMR}$  (200 MHz,  $\text{CDCl}_3$ )  $\delta$  33.2.

**(Z)-(3,7-Dimethylocta-2,6-dien-1-yl)diphenylphosphine oxide(3au)** Isolated as white solid;

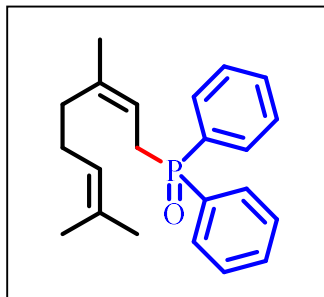

Yield: 115 mg (68 %)  $^1\text{H NMR}$  (600 MHz, Chloroform-*d*)  $\delta$  7.72 – 7.69 (m, 4H), 7.49 – 7.46 (m, 2H), 7.43 – 7.40 (m, 4H), 5.23 – 5.19 (m, 1H), 4.96 – 4.94 (m, 1H), 3.08–3.04 (m, 2H), 1.94 – 1.93 (m, 4H), 1.59 (s, 3H), 1.51 (s, 3H), 1.41 – 1.40 (m, 3H).  $^{13}\text{C NMR}$  (150 MHz,  $\text{CDCl}_3$ )  $\delta$  141.1 (d,  $J_{\text{C-P}}$  = 11.8 Hz), 132.9 (d,  $J_{\text{C-P}}$  = 97.2 Hz), 131.7 (d,  $J_{\text{C-P}}$  = 2.6 Hz), 131.6, 131.1 (d,  $J_{\text{C-P}}$  = 9.0 Hz), 128.4 (d,  $J_{\text{C-P}}$  = 11.3 Hz), 123.9, 112.3 (d,  $J_{\text{C-P}}$  = 8.5 Hz), 39.7 (d,  $J_{\text{C-P}}$  = 2.3 Hz), 30.9 (d,  $J_{\text{C-P}}$  = 69.8 Hz), 26.4 (d,  $J_{\text{C-P}}$  = 2.7 Hz), 25.7, 17.7, 16.3 (d,  $J_{\text{C-P}}$  = 2.2 Hz).  $^{31}\text{P NMR}$  (243 MHz,  $\text{CDCl}_3$ )  $\delta$  31.0. **HRMS (ESI+):**  $m/z$  calcd.  $\text{C}_{22}\text{H}_{27}\text{OP}$  For  $[\text{M}+\text{H}]^+$ : 339.1873; Found: 339.1853.

**(E)-(3,7-Dimethylocta-2,6-dien-1-yl)diphenylphosphine oxide(3at):<sup>10</sup>** Isolated as white

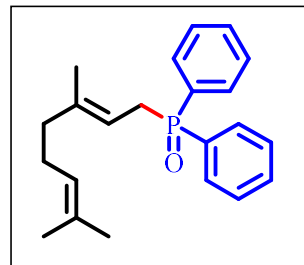

solid; Yield: 110 mg (65 %)  $^1\text{H NMR}$  (600 MHz, Chloroform-*d*)  $\delta$  7.72 – 7.69 (m, 4H), 7.50 – 7.47 (m, 2H), 7.45 – 7.41 (m, 4H), 5.23 – 5.19 (m, 1H), 5.01 – 4.99 (m, 1H), 3.09–3.05 (m, 2H), 1.89 – 1.88 (m, 4H), 1.65 – 1.63 (m, 6H), 1.53 (s, 3H).  $^{13}\text{C NMR}$  (150 MHz,  $\text{CDCl}_3$ )  $\delta$  141.2 (d,  $J_{\text{C-P}}$  = 12.8 Hz), 133.9 (d,  $J_{\text{C-P}}$  = 97.3 Hz), 131.9, 131.7 (d,  $J_{\text{C-P}}$  = 2.7 Hz), 131.1 (d,  $J_{\text{C-P}}$  = 8.9 Hz), 128.6 (d,  $J_{\text{C-P}}$  = 11.5 Hz), 123.9, 112.7 (d,  $J_{\text{C-P}}$  = 7.9 Hz), 32.1 (d,  $J_{\text{C-P}}$  = 2.0 Hz), 30.5 (d,  $J_{\text{C-P}}$  = 70.3 Hz), 26.1 (d,  $J_{\text{C-P}}$  = 2.1 Hz), 25.7, 23.5 (d,  $J_{\text{C-P}}$  = 2.2 Hz), 17.7.

$^{31}\text{P}$  NMR (243 MHz,  $\text{CDCl}_3$ )  $\delta$  30.8.

**(4-Methylbenzyl)di(naphthalen-2-yl)phosphine oxide(3av):** Isolated as white solid; Yield:

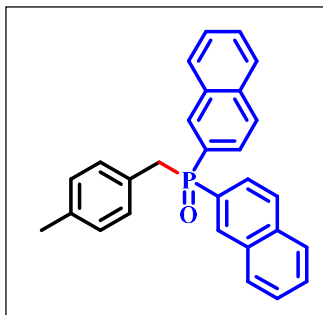

138 mg (68 %)  $^1\text{H}$  NMR (500 MHz, Chloroform-*d*)  $\delta$  8.37 – 8.34 (m, 2H), 7.90 – 7.85 (m, 6H), 7.70 (t,  $J = 9.0$  Hz, 2H), 7.58 (t,  $J = 7.1$  Hz, 2H), 7.53 (t,  $J = 7.5$  Hz, 2H), 7.06 – 7.04 (m, 2H), 6.97 – 6.96 (m, 2H), 3.81 (d,  $J = 13.5$  Hz, 2H), 2.23 (s, 3H).  $^{13}\text{C}$  NMR (125 MHz,  $\text{CDCl}_3$ )  $\delta$  136.6 (d,  $J_{\text{C-P}} = 3.1$  Hz), 134.7 (d,  $J_{\text{C-P}} = 2.3$  Hz), 133.4 (d,  $J_{\text{C-P}} = 8.1$  Hz), 132.6 (d,  $J_{\text{C-P}} = 12.6$  Hz), 130.1 (d,  $J_{\text{C-P}} = 5.1$  Hz), 129.7 (d,  $J_{\text{C-P}} = 98.4$  Hz), 129.3 (d,  $J_{\text{C-P}} = 2.4$  Hz), 129.0, 128.4 (d,  $J_{\text{C-P}} = 11.5$  Hz), 128.3, 128.0, 127.9, 127.0, 126.1 (d,  $J_{\text{C-P}} = 10.2$  Hz), 37.6 (d,  $J_{\text{C-P}} = 66.9$  Hz), 21.1.  $^{31}\text{P}$  NMR (200 MHz,  $\text{CDCl}_3$ )  $\delta$  29.8. HRMS (ESI+):  $m/z$

calcd.  $\text{C}_{28}\text{H}_{23}\text{OP}$  For  $[\text{M}+\text{H}]^+$ : 407.1560; Found: 407.1557.

**Bis(benzo[d][1,3]dioxol-5-yl)(4-methylbenzyl)phosphine oxide(3aw):** Isolated as white solid; Yield: 142 mg (72 %)  $^1\text{H}$  NMR (500 MHz, Chloroform-*d*)  $\delta$  7.22 – 7.18 (m, 2H), 7.07 – 7.05 (m, 2H), 7.02 – 6.99 (m, 4H), 6.87 – 6.84 (m, 2H), 6.01 (s, 4H), 3.53 (d,  $J = 13.5$  Hz, 2H), 2.27 (s, 3H).  $^{13}\text{C}$  NMR (125 MHz,  $\text{CDCl}_3$ )  $\delta$

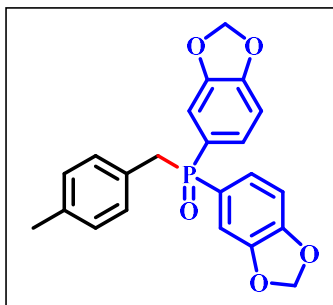

150.7 (d,  $J_{\text{C-P}} = 2.2$  Hz), 148.0 (d,  $J_{\text{C-P}} = 16.4$  Hz), 136.5 (d,  $J_{\text{C-P}} = 2.5$  Hz), 130.0 (d,  $J_{\text{C-P}} = 4.9$  Hz), 129.2 (d,  $J_{\text{C-P}} = 2.9$  Hz), 128.0 (d,  $J_{\text{C-P}} = 7.8$  Hz), 126.5 (d,  $J_{\text{C-P}} = 10.0$  Hz), 125.7 (d,  $J_{\text{C-P}} = 102.3$  Hz), 110.7 (d,  $J_{\text{C-P}} = 11.8$  Hz), 108.7 (d,  $J_{\text{C-P}} = 14.2$  Hz), 101.7, 38.9 (d,  $J_{\text{C-P}} = 68.2$  Hz), 21.2.  $^{31}\text{P}$  NMR (200 MHz,  $\text{CDCl}_3$ )  $\delta$  29.9. HRMS (ESI+):  $m/z$  calcd.  $\text{C}_{22}\text{H}_{19}\text{O}_5\text{P}$  For

$[\text{M}+\text{H}]^+$ : 396.1077 ; Found: 396.1097.

**Bis(4-methoxyphenyl)(4-methylbenzyl)phosphine oxide(3ax):** Isolated as white solid; Yield: 150 mg (82 %)  $^1\text{H}$  NMR (500 MHz, Chloroform-*d*)  $\delta$

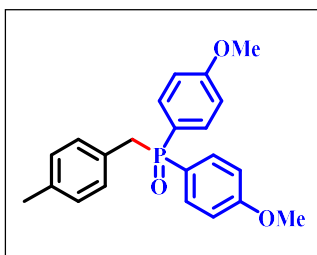

7.59 – 7.56 (m, 4H), 7.00 – 6.96 (m, 4H), 6.93 – 6.92 (m, 4H), 3.82 (s, 6H), 3.55 (d,  $J = 13.6$  Hz, 2H), 2.26 (s, 3H).  $^{13}\text{C}$  NMR (125 MHz,  $\text{CDCl}_3$ )  $\delta$  162.3 (d,  $J_{\text{C-P}} = 2.2$  Hz), 136.3 (d,  $J_{\text{C-P}} = 2.8$  Hz), 133.1 (d,  $J_{\text{C-P}} = 10.0$  Hz), 130.1 (d,  $J_{\text{C-P}} = 4.7$  Hz), 129.1 (d,  $J_{\text{C-P}} = 1.75$  Hz), 128.4 (d,  $J_{\text{C-P}} = 7.6$  Hz), 123.9 (d,  $J_{\text{C-P}} = 104.9$  Hz), 114.0 (d,  $J_{\text{C-P}} = 14.9$  Hz), 55.4, 38.2 (d,  $J_{\text{C-P}} = 67.7$  Hz), 21.1.  $^{31}\text{P}$  NMR (200 MHz,  $\text{CDCl}_3$ )  $\delta$  29.7. HRMS (ESI+):  $m/z$  calcd.  $\text{C}_{22}\text{H}_{23}\text{O}_3\text{P}$  For  $[\text{M}+\text{H}]^+$ : 367.1458; Found: 367.1456.

**(4-Methylbenzyl)di-p-tolylphosphine oxide(3ay):** Isolated as white solid; Yield: 154 mg (92 %)

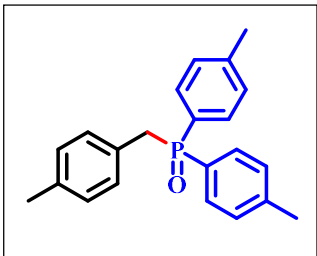

$^1\text{H NMR}$  (400 MHz, Chloroform-*d*)  $\delta$  7.58 – 7.53 (m, 4H), 7.23 – 7.20 (m, 4H), 6.98 (s, 4H), 3.57 (d,  $J = 13.6$  Hz, 2H), 2.36 (s, 6H), 2.25 (d,  $J = 1.8$  Hz, 3H).  $^{13}\text{C NMR}$  (125 MHz,  $\text{CDCl}_3$ )  $\delta$  142.1 (d,  $J_{\text{C-P}} = 2.7$  Hz), 136.3 (d,  $J_{\text{C-P}} = 3.2$  Hz), 131.2 (d,  $J_{\text{C-P}} = 9.4$  Hz), 130.0 (d,  $J_{\text{C-P}} = 5.1$  Hz), 129.4 (d,  $J_{\text{C-P}} = 100.5$  Hz), 129.2 (d,  $J_{\text{C-P}} = 12.0$  Hz), 129.1 (d,  $J_{\text{C-P}} = 2.5$  Hz), 128.3 (d,  $J_{\text{C-P}} = 8.0$  Hz), 37.0, 21.6, 21.1.  $^{31}\text{P NMR}$  (200 MHz,  $\text{CDCl}_3$ )  $\delta$  29.8. **HRMS (ESI+):**  $m/z$  calcd.  $\text{C}_{22}\text{H}_{23}\text{O}_3\text{P}$  For  $[\text{M}+\text{H}]^+$ : 335.1560;

Found: 335.1548.

**4-Methylbenzyl diphenylphosphinate (4a):**<sup>18</sup> Isolated as colourless oil Yield. 100 mg 62 %

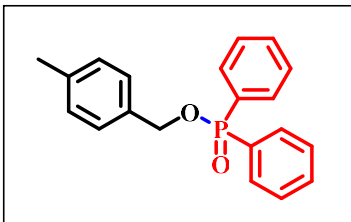

$^1\text{H NMR}$  (500 MHz, Chloroform-*d*)  $\delta$  7.85 – 7.80 (m, 4H), 7.53 – 7.50 (m, 2H), 7.45 – 7.42 (m, 4H), 7.25 (d,  $J = 8.3$  Hz, 2H), 7.15 (d,  $J = 7.7$  Hz, 2H), 5.02 (d,  $J = 6.6$  Hz, 2H), 2.34 (s, 3H).  $^{13}\text{C NMR}$  (125 MHz,  $\text{CDCl}_3$ )  $\delta$  138.3, 133.4 (d,  $J_{\text{C-P}} = 7.6$  Hz), 132.3 (d,  $J_{\text{C-P}} = 2.7$  Hz), 132.8 (d,  $J_{\text{C-P}} = 10.2$  Hz), 131.5 (d,  $J_{\text{C-P}} = 135.9$  Hz), 129.4, 128.6 (d,  $J_{\text{C-P}} = 13.1$  Hz), 128.2, 66.4 (d,  $J_{\text{C-P}} = 5.5$  Hz), 21.3.  $^{31}\text{P NMR}$  (200 MHz,

$\text{CDCl}_3$ )  $\delta$  32.1.

**Benzyl diphenylphosphinate (4b):**<sup>18</sup> Isolated as colourless oil yield: 93 mg 60 %  $^1\text{H NMR}$

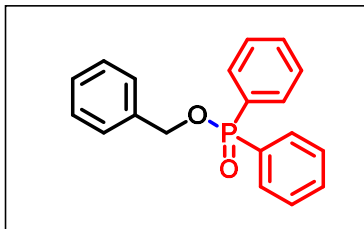

(500 MHz, Chloroform-*d*)  $\delta$  7.75 – 7.71 (m, 4H), 7.41 – 7.38 (m, 2H), 7.34 – 7.31 (m, 4H), 7.26 – 7.16 (m, 5H), 4.97 (d,  $J = 6.8$  Hz, 2H).  $^{13}\text{C NMR}$  (125 MHz,  $\text{CDCl}_3$ )  $\delta$  135.3 (d,  $J_{\text{C-P}} = 7.5$  Hz), 135.2 (d,  $J_{\text{C-P}} = 2.8$  Hz), 130.7 (d,  $J_{\text{C-P}} = 10.2$  Hz), 130.3 (d,  $J_{\text{C-P}} = 135.8$  Hz), 127.6, 127.5 (d,  $J_{\text{C-P}} = 3.6$  Hz), 127.3, 126.9, 65.3 (d,  $J_{\text{C-P}} = 5.4$  Hz).  $^{31}\text{P NMR}$  (200 MHz,  $\text{CDCl}_3$ )  $\delta$  32.4.

**4-(Tert-butyl)benzyl diphenylphosphinate (4c):**<sup>18</sup> Isolated as colourless oil yield: 117 mg

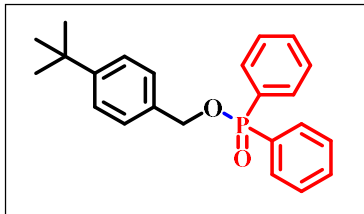

65 %  $^1\text{H NMR}$  (500 MHz, Chloroform-*d*)  $\delta$  7.85 – 7.81 (m, 4H), 7.52 – 7.49 (m, 2H), 7.44 – 7.41 (m, 4H), 7.37 (d,  $J = 8.2$  Hz, 2H), 7.30 (d,  $J = 8.2$  Hz, 2H), 5.04 (d,  $J = 6.7$  Hz, 2H), 1.31 (s, 9H).  $^{13}\text{C NMR}$  (125 MHz,  $\text{CDCl}_3$ )  $\delta$  151.4, 133.4 (d,  $J_{\text{C-P}} = 7.6$  Hz) 132.2 (d,  $J_{\text{C-P}} = 2.7$  Hz), 132.8 (d,  $J_{\text{C-P}} = 10.1$  Hz), 131.5 (d,  $J_{\text{C-P}} = 136.0$  Hz), 128.6 (d,  $J_{\text{C-P}} = 12.9$  Hz), 127.9, 125.6, 66.3 (d,  $J_{\text{C-P}} = 5.5$  Hz), 34.7, 31.4.  $^{31}\text{P NMR}$  (200

MHz,  $\text{CDCl}_3$ )  $\delta$  32.2.

**4-Methoxybenzyl diphenylphosphinate(4d):<sup>18</sup> Isolated as colourless oil yield: 102 mg 60**

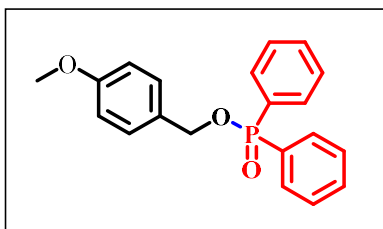

**% <sup>1</sup>H NMR (500 MHz, Chloroform-*d*)**  $\delta$  7.83 – 7.79 (m, 4H), 7.52 – 7.49 (m, 2H), 7.45 – 7.41 (m, 4H), 7.29 – 7.26 (m, 2H), 6.87 – 6.85 (m, 2H), 5.00 (d,  $J$  = 6.9 Hz, 2H), 3.80 (s, 3H). **<sup>13</sup>C NMR (125 MHz, CDCl<sub>3</sub>)**  $\delta$  159.8, 132.2 (d,  $J_{C-P}$  = 2.7 Hz), 131.8 (d,  $J_{C-P}$  = 10.1 Hz), 131.6 (d,  $J_{C-P}$  = 135.9 Hz), 129.9, 128.6 (d,  $J_{C-P}$  = 12.9 Hz), 128.5, 114.0, 66.3 (d,  $J_{C-P}$  = 5.5 Hz), 55.4. **<sup>31</sup>P NMR (200 MHz, CDCl<sub>3</sub>)**  $\delta$  32.1.

**4-Fluorobenzyl diphenylphosphinate (4e):<sup>18</sup> Isolated as colourless oil yield: 85 mg 52 %**

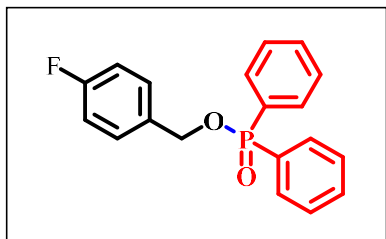

**<sup>1</sup>H NMR (500 MHz, Chloroform-*d*)**  $\delta$  7.82 – 7.79 (m, 4H), 7.53 – 7.50 (m, 2H), 7.45 – 7.41 (m, 4H), 7.34 – 7.31 (m, 2H), 7.01 (t,  $J$  = 8.6 Hz, 2H), 5.02 (d,  $J$  = 7.3 Hz, 2H). **<sup>13</sup>C NMR (125 MHz, CDCl<sub>3</sub>)**  $\delta$  162.7 6 (d,  $J_{C-F}$  = 245.6 Hz), 132.4 6 (d,  $J_{C-P}$  = 2.8 Hz), 131.2 6 (dd,  $J_{C-F}$  = 7 Hz,  $J_{C-P}$  = 3.1 Hz), 131.7 (d,  $J_{C-P}$  = 10.1 Hz), 131.3 (d,  $J_{C-P}$  = 136.0 Hz), 130.0 (d,  $J_{C-P}$  = 8.3 Hz), 128.7 (d,  $J_{C-P}$  = 13.2 Hz), 115.6 (d,  $J_{C-P}$  = 21.5 Hz), 65.8 (d,  $J_{C-P}$  = 5.4 Hz). **<sup>31</sup>P NMR (200 MHz, CDCl<sub>3</sub>)**  $\delta$  32.6. **<sup>19</sup>F NMR (471 MHz, CDCl<sub>3</sub>)**  $\delta$  -113.5(d,  $J_{P-F}$  = 2.6 Hz)

**4-Chlorobenzyl diphenylphosphinate (4f):<sup>18</sup> Isolated as colourless oil yield: 95 mg 55 %**

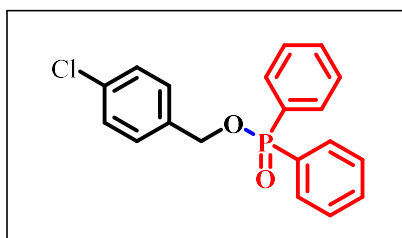

**<sup>1</sup>H NMR (500 MHz, Chloroform-*d*)**  $\delta$  7.82 – 7.78 (m, 4H), 7.54 – 7.51 (m, 2H), 7.46 – 7.42 (m, 4H), 7.31 – 7.27 (m, 4H), 5.02 (d,  $J$  = 7.2 Hz, 2H). **<sup>13</sup>C NMR (125 MHz, CDCl<sub>3</sub>)**  $\delta$  135.0 (d,  $J_{C-P}$  = 27.2 Hz), 134.3, 132.4 (d,  $J_{C-P}$  = 2.8 Hz), 131.8 (d,  $J_{C-P}$  = 10.0 Hz), 131.2 (d,  $J_{C-P}$  = 135.5 Hz), 129.4, 128.8 (d,  $J_{C-P}$  = 9.5 Hz), 128.7, 65.7 (d,  $J_{C-P}$  = 5.4 Hz). **<sup>31</sup>P NMR (200 MHz, CDCl<sub>3</sub>)**  $\delta$  32.7.

**4-Bromobenzyl diphenylphosphinate (4g):<sup>18</sup> Isolated as colourless oil yield: 116 mg 60 %**

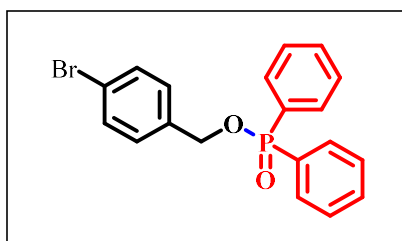

**<sup>1</sup>H NMR (500 MHz, Chloroform-*d*)**  $\delta$  7.82 – 7.78 (m, 4H), 7.54 – 7.50 (m, 2H), 7.46 – 7.42 (m, 6H), 7.23 (d,  $J$  = 8.3 Hz, 2H), 5.00 (d,  $J$  = 7.2 Hz, 2H). **<sup>13</sup>C NMR (125 MHz, CDCl<sub>3</sub>)**  $\delta$  135.5 (d,  $J_{C-P}$  = 7.0 Hz), 132.4 (d,  $J_{C-P}$  = 2.8 Hz), 138.1, 131.7 (d,  $J_{C-P}$  = 7.4 Hz), 131.2 (d,  $J_{C-P}$  = 136.0 Hz), 129.7, 128.7 (d,  $J_{C-P}$  = 13.2 Hz), 122.5, 65.7 (d,  $J_{C-P}$  = 5.4 Hz). **<sup>31</sup>P NMR (200 MHz, CDCl<sub>3</sub>)**  $\delta$  32.7.

**4-(Trifluoromethyl)benzyl diphenylphosphinat(4h):**<sup>20</sup> <sup>1</sup>H NMR (500 MHz, Chloroform-

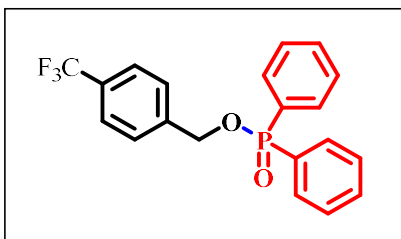

*d*) Isolated as colourless oil yield: 98 mg 52 %  $\delta$  7.85 – 7.80 (m, 4H), 7.61 – 7.59 (m, 2H), 7.56 – 7.52 (m, 2H), 7.48 – 7.43 (m, 6H), 5.11 (d,  $J = 7.2$  Hz, 2H). <sup>13</sup>C NMR (125 MHz, CDCl<sub>3</sub>)  $\delta$  140.5 (d,  $J_{C-P} = 7.2$  Hz), 132.5 (d,  $J_{C-P} = 2.7$  Hz), 131.8 (d,  $J_{C-P} = 10.1$  Hz), 131.1 (d,  $J_{C-P} = 136.0$  Hz), 130.70-130.19 (m), 128.8, 128.8 (d,  $J_{C-P} = 13.0$  Hz), 126.5 (q,  $J_{C-F} = 270.7$  Hz), 125.6 (q,  $J_{C-F} = 3.8$  Hz), 65.5 (d,  $J_{C-P} = 5.2$  Hz). <sup>31</sup>P NMR (200 MHz, CDCl<sub>3</sub>)  $\delta$  33.1. <sup>19</sup>F NMR (471 MHz, CDCl<sub>3</sub>)  $\delta$  -62.6.

**[1,1'-Biphenyl]-4-ylmethyl diphenylphosphinate(4i):**<sup>25</sup> Isolated as colourless oil yield: 131

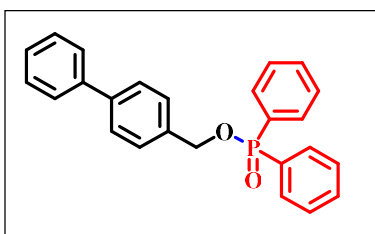

mg 68 % <sup>1</sup>H NMR (500 MHz, Chloroform-*d*)  $\delta$  7.87 – 7.83 (m, 4H), 7.59 – 7.56 (m, 4H), 7.55 – 7.51 (m, 2H), 7.47 – 7.43 (m, 8H), 7.37 – 7.34 (m, 1H), 5.11 (d,  $J = 7$  Hz, 2H). <sup>13</sup>C NMR (125 MHz, CDCl<sub>3</sub>)  $\delta$  141.4, 140.8, 135.4 (d,  $J_{C-P} = 7.4$  Hz), 132.3 (d,  $J_{C-P} = 2.8$  Hz), 131.8 (d,  $J_{C-P} = 10.1$  Hz), 131.4 (d,  $J_{C-P} = 136.0$  Hz), 129.0, 128.8 (d,  $J_{C-P} = 13.21$  Hz), 128.5, 127.5, 127.4, 127.2, 66.3 (d,  $J_{C-P} = 5.4$  Hz). <sup>31</sup>P NMR (200 MHz, CDCl<sub>3</sub>)  $\delta$  32.5.

**Naphthalen-2-ylmethyl diphenylphosphinate(4j):**<sup>18</sup> Isolated as colourless oil yield: 133

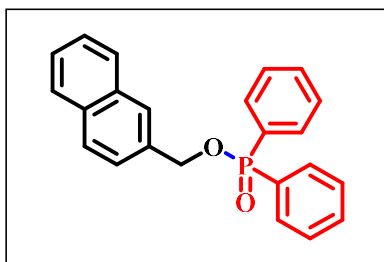

mg 74 % <sup>1</sup>H NMR (500 MHz, Chloroform-*d*)  $\delta$  7.88 – 7.78 (m, 8H), 7.53 – 7.42 (m, 9H), 5.23 (d,  $J = 6.9$  Hz, 2H). <sup>13</sup>C NMR (125 MHz, CDCl<sub>3</sub>)  $\delta$  132.8 (d,  $J_{C-P} = 7.4$  Hz), 132.2 (d,  $J_{C-P} = 3.1$  Hz), 131.3 (d,  $J_{C-P} = 2.8$  Hz), 130.9, 130.8, 130.3 (d,  $J_{C-P} = 136.5$  Hz), 127.7, 127.6, 127.5, 127.1, 126.8, 126.1, 125.4 (d,  $J_{C-P} = 2.7$  Hz), 124.7, 65.6 (d,  $J_{C-P} = 5.4$  Hz). <sup>31</sup>P NMR (200 MHz, CDCl<sub>3</sub>)  $\delta$  32.6.

**Naphthalen-1-ylmethyl diphenylphosphinate(4k):**<sup>18</sup> Isolated as colourless oil yield: 129

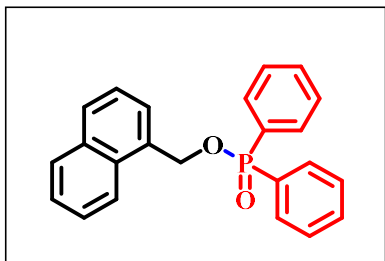

mg 72 % <sup>1</sup>H NMR (500 MHz, Chloroform-*d*)  $\delta$  8.11 (d,  $J = 8.1$  Hz, 1H), 7.87 (d,  $J = 7.7$  Hz, 1H), 7.87 – 7.79 (m, 5H), 7.55 – 7.45 (m, 5H), 7.45 – 7.39 (m, 5H), 5.54 (d,  $J = 6.7$  Hz, 2H). <sup>13</sup>C NMR (125 MHz, CDCl<sub>3</sub>)  $\delta$  133.8, 132.3 (d,  $J_{C-P} = 2.8$  Hz), 131.9 (d,  $J_{C-P} = 7.3$  Hz), 131.8 (d,  $J_{C-P} = 10.2$  Hz), 131.5, 131.4 (d,  $J_{C-P} = 135.8$  Hz), 129.5, 128.7, 128.6 (d,  $J_{C-P} = 13.0$  Hz), 127.0, 126.7, 126.1, 125.3, 123.7, 64.8 (d,  $J_{C-P} = 5.4$  Hz). <sup>31</sup>P NMR (200 MHz, CDCl<sub>3</sub>)  $\delta$  32.5.

**Benzo[d][1,3]dioxol-5-ylmethyl diphenylphosphinate(4n):<sup>23</sup> Isolated as colourless oil**

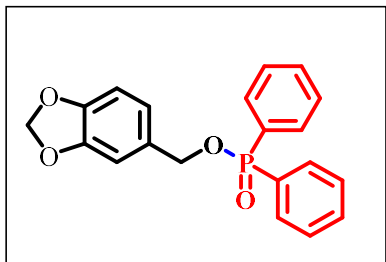

**yield: 92 mg 56 %** <sup>1</sup>H NMR (500 MHz, Chloroform-*d*) δ 7.82 – 7.79 (m, 4H), 7.53 – 7.50 (m, 2H), 7.45 – 7.42 (m, 4H), 6.86 (s, 1H), 6.80 – 6.78 (m, 1H), 6.78 – 6.73 (m, 1H), 5.95 (s, 2H), 4.96 (d, *J* = 6.9 Hz, 2H). <sup>13</sup>C NMR (125 MHz, CDCl<sub>3</sub>) δ 147.8 (d, *J*<sub>C-P</sub> = 14.1 Hz), 132.3 (d, *J*<sub>C-P</sub> = 2.8 Hz), 131.8 (d, *J*<sub>C-P</sub> = 10.2 Hz), 131.4 (d, *J*<sub>C-P</sub> = 136.0 Hz), 130.2 (d, *J*<sub>C-P</sub> = 7.3 Hz), 128.7, 128.6, 122.1, 108.9, 108.3, 101.3, 66.5 (d, *J*<sub>C-P</sub> = 5.4 Hz). <sup>31</sup>P NMR (200 MHz, CDCl<sub>3</sub>) δ 32.3.

**Pyridin-2-ylmethyl diphenylphosphinate(4o):<sup>24</sup> Isolated as colourless oil yield: 82 mg 53**

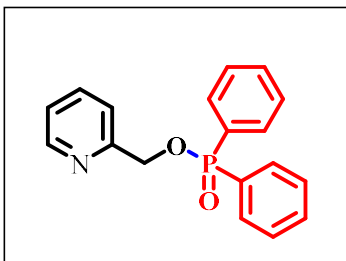

**%** <sup>1</sup>H NMR (500 MHz, Chloroform-*d*) δ 8.54 (d, *J* = 4.0 Hz, 1H), 7.88 – 7.84 (m, 4H), 7.71 – 7.68 (m, 1H), 7.55 – 7.50 (m, 3H), 7.47 – 7.44 (m, 4H), 7.22 – 7.19 (m, 1H), 5.16 (d, *J* = 7.4 Hz, 2H). <sup>13</sup>C NMR (125 MHz, CDCl<sub>3</sub>) δ 156.5 (d, *J*<sub>C-P</sub> = 8.0 Hz), 149.3, 137.0, 132.5 (d, *J*<sub>C-P</sub> = 2.9 Hz), 131.8 (d, *J*<sub>C-P</sub> = 10.1 Hz), 131.1 (d, *J*<sub>C-P</sub> = 136.2 Hz), 128.8 (d, *J*<sub>C-P</sub> = 13.2 Hz), 123.0, 121.8, 67.1 (d, *J*<sub>C-P</sub> = 5.3 Hz). <sup>31</sup>P NMR (200 MHz, CDCl<sub>3</sub>) δ 33.1.

**Octadecyl diphenylphosphinate Isolated(4p)<sup>20</sup> as colourless oil yield: 212 mg 90 %**

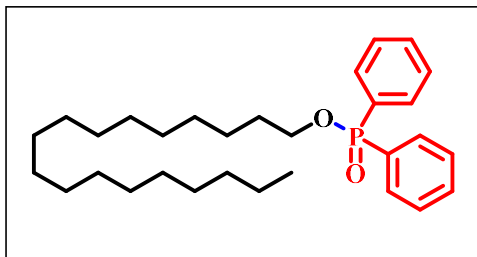

**NMR (400 MHz, Chloroform-*d*)** δ 7.83 – 7.78 (m, 4H), 7.53 – 7.49 (m, 2H), 7.46 – 7.42 (m, 4H), 4.02 (q, *J* = 6.6 Hz, 2H), 1.75 – 1.68 (m, 2H), 1.41 – 1.36 (m, 2H), 1.25 – 1.24 (m, 28H), 0.88 (t, *J* = 6.8 Hz, 3H). <sup>13</sup>C NMR (125 MHz, CDCl<sub>3</sub>) δ 132.2 (d, *J*<sub>C-P</sub> = 2.6 Hz), 131.8 (d, *J*<sub>C-P</sub> = 9.8 Hz), 131.7 (d, *J*<sub>C-P</sub> = 136.9 Hz), 128.6 (d, *J*<sub>C-P</sub> = 13.0 Hz), 65.2 (d, *J*<sub>C-P</sub> = 5.9 Hz), 32.1, 30.6 (d, *J*<sub>C-P</sub> = 6.5 Hz), 29.83, 29.80,

29.79, 29.77, 29.7, 29.62, 29.5, 29.3, 25.7, 22.8, 14.2. <sup>31</sup>P NMR (200 MHz, CDCl<sub>3</sub>) δ 31.2.

**Hexadecyl diphenylphosphinate Isolated as colourless oil yield (4q): 191 mg 86 %**

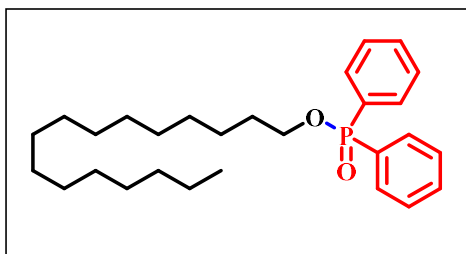

**<sup>1</sup>H NMR (400 MHz, Chloroform-*d*)**  $\delta$  7.82 – 7.77 (m, 4H), 7.52 – 7.48 (m, 2H), 7.45 – 7.41 (m, 4H), 4.03–3.98 (m, 2H), 1.74 – 1.67 (m, 2H), 1.41 – 1.35 (m, 2H), 1.27 – 1.23 (m, 24H), 0.87 (t,  $J = 6.8$  Hz, 3H). **<sup>13</sup>C NMR (125 MHz, CDCl<sub>3</sub>)**  $\delta$  131.2 (d,  $J_{C-P} = 2.7$  Hz), 130.8 (d,  $J_{C-P} = 136.2$  Hz), 130.7 (d,  $J_{C-P} = 10.0$  Hz), 127.6 (d,  $J_{C-P} = 13.0$  Hz), 64.2 (d,  $J_{C-P} = 6.2$  Hz), 31.0, 30.0, 29.6 (d,  $J_{C-P} = 6.5$  Hz), 28.8, 28.79, 28.77,

28.75, 28.7 28.6, 28.5, 28.3, 24.7, 21.8, 13.2. **<sup>31</sup>P NMR (200 MHz, CDCl<sub>3</sub>)**  $\delta$  31.2. **HRMS (ESI+):** m/z calcd. C<sub>28</sub>H<sub>43</sub>O<sub>2</sub>P For [M+H]<sup>+</sup>: 443.3074; Found: 443.3041.

**Tetradecyl diphenylphosphinate Isolated as colourless oil yield (4r) 183 mg 88 %**

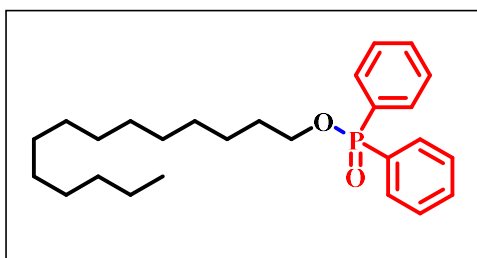

**<sup>1</sup>H NMR (500 MHz, Chloroform-*d*)**  $\delta$  7.82 – 7.78 (m, 4H), 7.51 – 7.48 (m, 2H), 7.45 – 7.42 (m, 4H), 4.03 – 3.99 (m, 2H), 1.74–1.68 (m, 2H) 1.39 – 1.34 (m, 2H), 1.28 – 1.22 (m, 20H), 0.87 (t,  $J = 6.8$  Hz, 3H). **<sup>13</sup>C NMR (125 MHz, CDCl<sub>3</sub>)**  $\delta$  132.2 (d,  $J_{C-P} = 2.7$  Hz), 131.8 (d,  $J_{C-P} = 136.6$  Hz), 131.7 (d,  $J_{C-P} = 10.0$  Hz), 128.6 (d,  $J_{C-P} = 13.0$  Hz), 65.2 (d,  $J_{C-P} = 6.0$  Hz), 32.0, 30.7 (d,  $J_{C-P} = 6.6$  Hz), 29.81, 29.79, 29.77, 29.76, 29.68, 29.62, 29.5, 29.3, 25.7, 22.8,

14.2. **<sup>31</sup>P NMR (200 MHz, CDCl<sub>3</sub>)**  $\delta$  31.1. **HRMS (ESI+):** m/z calcd. C<sub>26</sub>H<sub>39</sub>O<sub>2</sub>P For [M+H]<sup>+</sup>: 399.2812; Found: 399.2785.

**Dodecyl diphenylphosphinate Isolated as Colourless Colourless oil yield(4s): 166 mg 86 %**

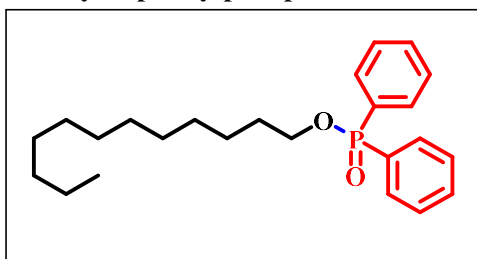

**<sup>1</sup>H NMR (400 MHz, Chloroform-*d*)**  $\delta$  7.82 – 7.77 (m, 4H), 7.52 – 7.48 (m, 2H), 7.45 – 7.41 (m, 4H), 4.03 – 3.98 (m, 2H), 1.74 – 1.67 (m, 2H), 1.39 – 1.33 (m, 2H), 1.26 – 1.24 (m, 16H), 0.87 (t,  $J = 6.5$  Hz, 3H).

**<sup>13</sup>C NMR (125 MHz, CDCl<sub>3</sub>)**  $\delta$  132.2, 131.8 (d,  $J_{C-P} = 137.8$  Hz), 131.7 (d,  $J_{C-P} = 9.6$  Hz), 128.6 (d,  $J_{C-P} = 12.8$  Hz), 65.2 (d,  $J_{C-P} = 5.3$  Hz), 32.0, 30.6 (d,

$J_{C-P} = 5.9$  Hz), 29.74, 29.67, 29.6, 29.5, 29.3, 25.7, 22.8, 14.2. **<sup>31</sup>P NMR (200 MHz, CDCl<sub>3</sub>)**  $\delta$  31.2. **HRMS (ESI+):** m/z calcd. C<sub>24</sub>H<sub>35</sub>O<sub>2</sub>P For [M+H]<sup>+</sup>: 387.2448; Found: 387.2430.

**Decyl diphenylphosphinate(4t):<sup>22</sup> <sup>1</sup>H NMR (500 MHz, Chloroform-*d*) Isolated as**

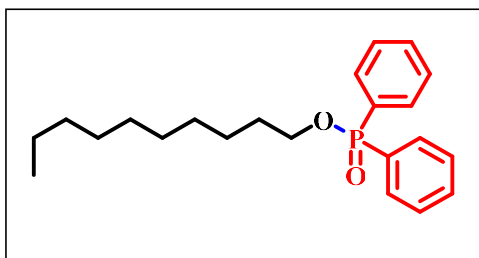

**Colourless Colourless oil yield: 152 mg 85 %**  $\delta$  7.77 – 7.70 (m, 4H), 7.45 – 7.42 (m, 2H), 7.39 – 7.35 (m, 4H), 3.96 – 3.92 (m, 2H), 1.68 – 1.54 (m, 3H), 1.21 – 1.15 (m, 13H), 0.81 (t,  $J = 7.3$  Hz, 3H). <sup>13</sup>C NMR (126 MHz, CDCl<sub>3</sub>)  $\delta$  132.1 (d,  $J_{C-P} = 2.8$  Hz), 131.8 (d,  $J_{C-P} = 136.1$  Hz), 131.7 (d,  $J_{C-P} = 10.0$  Hz), 128.7 (d,  $J_{C-P} = 13.1$  Hz), 65.1 (d,  $J_{C-P} = 6.0$  Hz), 32.0, 30.6 (d,  $J_{C-P} = 6.5$  Hz), 29.60, 29.58, 29.4, 29.23 25.7, 22.8, 14.2.

<sup>31</sup>P NMR (200 MHz, CDCl<sub>3</sub>)  $\delta$  31.1.

**Nonyl diphenylphosphinate(4u):<sup>20</sup> <sup>1</sup>H NMR (500 MHz, Chloroform-*d*) Isolated as**

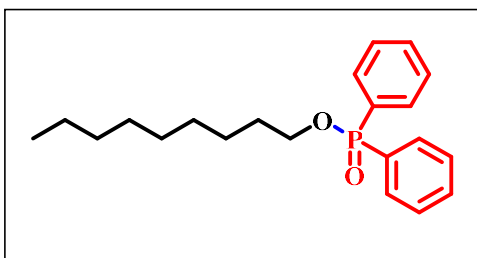

**Colourless Colourless oil yield: 138 mg 80 %**  $\delta$  7.81 – 7.77 (m, 4H), 7.51 – 7.48 (m, 2H), 7.44 – 7.41 (m, 4H), 4.02-3.98 (m, 2H), 1.73 – 1.68 (m, 2H), 1.39 – 1.35 (m, 2H), 1.27 – 1.22 (m, 10H), 0.86 (t,  $J = 6.8$  Hz, 3H). <sup>13</sup>C NMR (125 MHz, CDCl<sub>3</sub>)  $\delta$  131.1 (d,  $J_{C-P} = 2.6$  Hz), 130.7 (d,  $J_{C-P} = 136.2$  Hz), 130.7 (d,  $J_{C-P} = 9.8$  Hz), 127.6 (d,  $J_{C-P} = 12.9$  Hz), 64.2 (d,  $J_{C-P} = 5.9$  Hz), 30.9, 29.6 (d,  $J_{C-P} = 6.4$  Hz), 28.5, 28.3,

28.2, 24.7, 21.7, 13.2. <sup>31</sup>P NMR (200 MHz, CDCl<sub>3</sub>)  $\delta$  31.2.

**Octyl diphenylphosphinate (4v):<sup>19</sup> <sup>1</sup>H NMR (500 MHz, Chloroform-*d*) Isolated as**

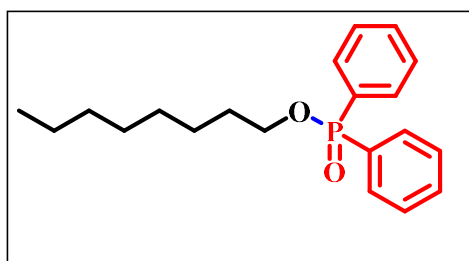

**Colourless Colourless oil yield: 129 mg 78 %**  $\delta$  7.82 – 7.78 (m, 4H), 7.51 – 7.48 (m, 2H), 7.45 – 7.41 (m, 4H), 4.03 – 3.98 (m, 2H), 1.72 – 1.69 (m, 2H), 1.38 – 1.35 (m, 2H), 1.27 – 1.20 (m, 8H), 0.87 – 0.83 (m, 3H). <sup>13</sup>C NMR (125 MHz, CDCl<sub>3</sub>)  $\delta$  132.2 (d,  $J_{C-P} = 2.7$  Hz), 131.8 (d,  $J_{C-P} = 136.2$  Hz), 131.7 (d,  $J_{C-P} = 10.0$  Hz), 128.7 (d,  $J_{C-P} = 13.0$  Hz), 65.1 (d,  $J_{C-P} = 6.0$  Hz), 31.9, 30.6 (d,  $J_{C-P} = 6.6$  Hz), 29.24, 29.20,

25.7, 22.7, 14.2. <sup>31</sup>P NMR (200 MHz, CDCl<sub>3</sub>)  $\delta$  31.2.

**Heptyl diphenylphosphinate (4w):**<sup>20</sup> <sup>1</sup>H NMR (400 MHz, DMSO-*d*<sub>6</sub>) Isolated as colourless

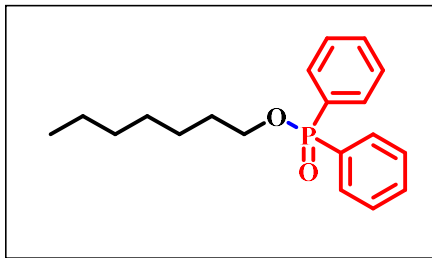

oil yield: **119 mg 75 %**  $\delta$  7.83 – 7.78 (m, 4H), 7.53 – 7.49 (m, 2H), 7.46 – 7.41 (m, 4H), 4.04–3.99 (m, 2H), 1.75 – 1.68 (m, 3H), 1.40 – 1.35 (m, 2H), 1.28 – 1.22 (m, 5H), 0.88 – 0.84 (m, 3H). <sup>13</sup>C NMR (125 MHz, CDCl<sub>3</sub>)  $\delta$  132.2 (d,  $J_{C-P}$  = 2.8 Hz), 131.8 (d,  $J_{C-P}$  = 136.5 Hz), 131.7 (d,  $J_{C-P}$  = 10.0 Hz), 128.7 (d,  $J_{C-P}$  = 12.9 Hz), 65.2 (d,  $J_{C-P}$  = 6.0 Hz), 31.8, 30.7 (d,  $J_{C-P}$  = 6.7 Hz), 29.0, 25.7, 22.7, 14.2. <sup>31</sup>P NMR (200 MHz, CDCl<sub>3</sub>)  $\delta$  31.1.

**Hexyl diphenylphosphinate (4x):**<sup>20</sup> <sup>1</sup>H NMR (500 MHz, Chloroform-*d*) Isolated as

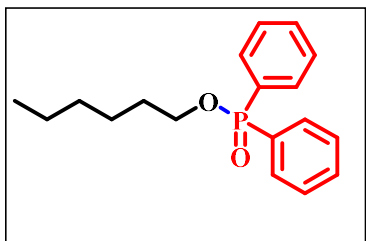

colourless oil yield: **105 mg 70 %**  $\delta$  7.82 – 7.78 (m, 4H), 7.52 – 7.49 (m, 2H), 7.45 – 7.42 (m, 4H), 4.04 – 4.00 (m, 2H), 1.74 – 1.68 (m, 2H), 1.41 – 1.36 (m, 2H), 1.31 – 1.23 (m, 4H), 0.88 – 0.84 (m, 3H). <sup>13</sup>C NMR (125 MHz, CDCl<sub>3</sub>)  $\delta$  132.2 (d,  $J_{C-P}$  = 2.8 Hz), 131.8 (d,  $J_{C-P}$  = 136.4 Hz), 131.7 (d,  $J_{C-P}$  = 10.0 Hz), 128.7 (d,  $J_{C-P}$  = 13.0 Hz), 65.2 (d,  $J_{C-P}$  = 6.0 Hz), 31.4, 30.6 (d,  $J_{C-P}$  = 6.5 Hz), 25.4, 22.6, 14.1. <sup>31</sup>P NMR (200 MHz, CDCl<sub>3</sub>)  $\delta$  31.1.

**Pentyl diphenylphosphinate (4y):**<sup>20</sup> <sup>1</sup>H NMR (400 MHz, Chloroform-*d*) Isolated as

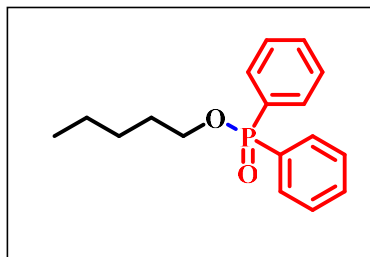

colourless oil yield: **94 mg 65 %**  $\delta$  7.82 – 7.77 (m, 4H), 7.51 – 7.47 (m, 2H), 7.44 – 7.40 (m, 4H), 4.03 – 4.01 (m, 2H), 1.74 – 1.67 (m, 2H), 1.39 – 1.26 (m, 4H), 0.87 (t,  $J$  = 7.1 Hz, 3H). <sup>13</sup>C NMR (125 MHz, CDCl<sub>3</sub>)  $\delta$  131.1 (d,  $J_{C-P}$  = 2.8 Hz), 130.8 (d,  $J_{C-P}$  = 136.2 Hz), 130.7 (d,  $J_{C-P}$  = 10.0 Hz), 127.6 (d,  $J_{C-P}$  = 13.1 Hz), 64.1 (d,  $J_{C-P}$  = 6.1 Hz), 29.3 (d,  $J_{C-P}$  = 6.6 Hz), 26.8, 21.3, 13.0. <sup>31</sup>P NMR (200 MHz, CDCl<sub>3</sub>)  $\delta$  31.1.

**Butyl diphenylphosphinate (4z):**<sup>19</sup> <sup>1</sup>H NMR (500 MHz, Chloroform-*d*) Isolated as

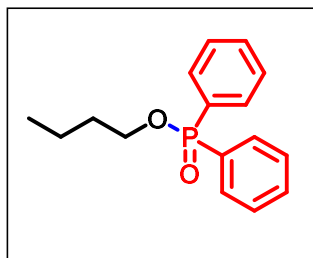

colourless oil yield: **69 mg 50 %**  $\delta$  7.84 – 7.77 (m, 4H), 7.51 – 7.48 (m, 2H), 7.46 – 7.41 (m, 4H), 4.05 – 3.99 (m, 2H), 1.73 – 1.65 (m, 2H), 1.45 – 1.39 (m, 2H), 0.91 (t,  $J$  = 7.1 Hz, 3H). <sup>13</sup>C NMR (126 MHz, CDCl<sub>3</sub>)  $\delta$  132.2 (d,  $J_{C-P}$  = 2.8 Hz), 131.8 (d,  $J_{C-P}$  = 136.2 Hz), 131.7 (d,  $J_{C-P}$  = 10.0 Hz), 128.6 (d,  $J_{C-P}$  = 12.9 Hz), 64.8 (d,  $J_{C-P}$  = 6.0 Hz), 32.7 (d,  $J_{C-P}$  = 6.7 Hz), 19.0, 13.8. <sup>31</sup>P NMR (200 MHz, CDCl<sub>3</sub>)  $\delta$  31.2.

**Propyl diphenylphosphinate (4aa):**<sup>20</sup> <sup>1</sup>H NMR (500 MHz, Chloroform-*d*) Isolated as

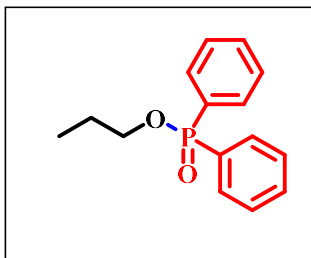

colourless oil yield: 46 mg 35 %  $\delta$  7.82 – 7.78 (m, 4H), 7.51 – 7.48 (m, 2H), 7.45 – 7.41 (m, 4H), 4.00 – 3.96 (m, 2H), 1.77 – 1.74 (m, 2H), 0.97 (t,  $J = 7.4$  Hz, 3H). <sup>13</sup>C NMR (125 MHz, CDCl<sub>3</sub>)  $\delta$  132.1 (d,  $J_{C-P} = 2.8$  Hz), 131.8 (d,  $J_{C-P} = 136.3$  Hz), 131.7 (d,  $J_{C-P} = 10.0$  Hz), 128.7 (d,  $J_{C-P} = 13.1$  Hz), 66.6 (d,  $J_{C-P} = 6.0$  Hz), 24.0 (d,  $J_{C-P} = 6.7$  Hz), 10.3. <sup>31</sup>P NMR (200 MHz, CDCl<sub>3</sub>)  $\delta$  31.1.

**2-Propylpentyl diphenylphosphinate Isolated as colourless oil yield (4ab): 109 mg 65 %**

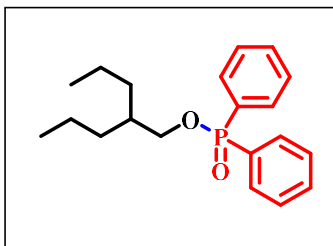

<sup>1</sup>H NMR (400 MHz, Chloroform-*d*)  $\delta$  7.82 – 7.76 (m, 4H), 7.52 – 7.48 (m, 2H), 7.45 – 7.41 (m, 4H), 3.98 – 3.86 (m, 2H), 1.64 – 1.55 (m, 1H), 1.50 – 1.30 (m, 4H), 1.28 – 1.18 (m, 4H), 0.85 (t,  $J = 7.3$  Hz, 6H). <sup>13</sup>C NMR (125 MHz, CDCl<sub>3</sub>)  $\delta$  132.1 (d,  $J_{C-P} = 2.7$  Hz), 131.8 (d,  $J_{C-P} = 136.4$  Hz,  $J_{C-P} = 3.0$  Hz), 131.7 (d,  $J_{C-P} = 10.0$  Hz,  $J_{C-P} = 1.8$  Hz), 128.6 (d,  $J_{C-P} = 13.0$  Hz), 66.8 (d,  $J_{C-P} = 6.2$  Hz), 40.3 (d,  $J_{C-P} = 6.8$  Hz), 30.1, 29.0, 23.6, 23.0, 14.1, 11.1. <sup>31</sup>P NMR (200 MHz, CDCl<sub>3</sub>)  $\delta$  30.8. HRMS

(ESI+): m/z calcd. C<sub>20</sub>H<sub>27</sub>O<sub>2</sub>P For [M+H]<sup>+</sup>: 331.1822; Found: 331.1810.

**2-Ethylhexyl diphenylphosphinate Isolated as colourless oil yield (4ac): 104 mg 62 %** <sup>1</sup>H

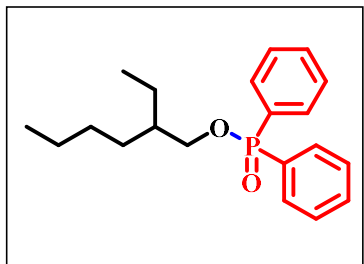

NMR (500 MHz, Chloroform-*d*)  $\delta$  7.81 – 7.77 (m, 4H), 7.51 – 7.48 (m, 2H), 7.45 – 7.42 (m, 4H), 3.95 – 3.87 (m, 2H), 1.63 – 1.56 (m, 1H), 1.47 – 1.30 (m, 4H), 1.28 – 1.19 (m, 4H), 0.85 (t,  $J = 7.3$  Hz, 6H). <sup>13</sup>C NMR (125 MHz, CDCl<sub>3</sub>)  $\delta$  132.16, 132.14 131.82 (d,  $J_{C-P} = 136.4$  Hz), 131.80 (d,  $J_{C-P} = 136.1$  Hz), 131.75 (d,  $J_{C-P} = 10.1$  Hz), 131.74 (d,  $J_{C-P} = 10.1$  Hz), 128.7, 128.6, 66.8 (d,  $J_{C-P} = 6.2$  Hz), 40.3 (d,  $J_{C-P} = 7.0$  Hz), 30.1, 29.0, 23.6, 23.0, 14.1, 11.1. <sup>31</sup>P NMR (200 MHz, CDCl<sub>3</sub>)  $\delta$  30.9. HRMS (ESI+): m/z calcd. C<sub>20</sub>H<sub>27</sub>O<sub>2</sub>P For

[M+H]<sup>+</sup>: 331.1822; Found: 331.1808.

**Isobutyl diphenylphosphinate (4ad):**  $^1\text{H}$  NMR (500 MHz, Chloroform-*d*)  $\delta$  7.75 - 7.68 (m,

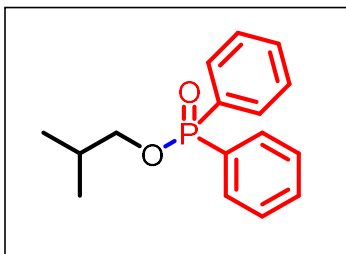

4H), 7.40 - 7.29 (m, 16H), 3.71 - 3.65 (m, 2H), 1.96 - 1.85 (m, 1H), 0.88 - 0.82 (m, 6H).  $^{13}\text{C}$  NMR (125 MHz,  $\text{CDCl}_3$ )  $\delta$  131.9, 131.5 (d,  $J_{\text{C-P}} = 136.3$  Hz), 131.4 (d,  $J_{\text{C-P}} = 9.9$  Hz), 128.3 (d,  $J_{\text{C-P}} = 13.0$  Hz), 70.5 (d,  $J_{\text{C-P}} = 6.1$  Hz), 29.0 (d,  $J_{\text{C-P}} = 6.8$  Hz), 18.7.  $^{31}\text{P}$  NMR (200 MHz,  $\text{CDCl}_3$ )  $\delta$  30.7.

**Isopentyl diphenylphosphinate (4ae):**<sup>19</sup> Isolated as colourless oil yield: 87 mg 60 %  $^1\text{H}$

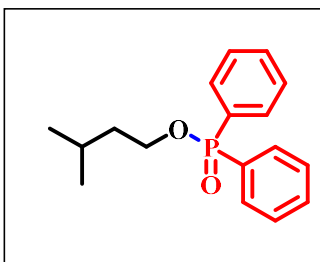

NMR (500 MHz, Chloroform-*d*)  $\delta$  7.81 - 7.76 (m, 4H), 7.50 - 7.45 (m, 2H), 7.43 - 7.39 (m, 4H), 4.05 - 4.01 (m, 2H), 1.78 - 1.71 (m, 1H), 1.61 - 1.57 (m, 2H), 0.87 - 0.84 (m, 6H).  $^{13}\text{C}$  NMR (125 MHz,  $\text{CDCl}_3$ )  $\delta$  132.1 (d,  $J_{\text{C-P}} = 2.8$  Hz), 131.7 (d,  $J_{\text{C-P}} = 136.1$  Hz), 131.6 (d,  $J_{\text{C-P}} = 10.0$  Hz), 128.6 (d,  $J_{\text{C-P}} = 12.9$  Hz), 63.5 (d,  $J_{\text{C-P}} = 6.2$  Hz), 39.3 (d,  $J_{\text{C-P}} = 6.4$  Hz), 24.7, 22.4.  $^{31}\text{P}$  NMR (200 MHz,  $\text{CDCl}_3$ )  $\delta$  31.1.

**Cyclohexylmethyl diphenylphosphinate (4af):** Isolated as colourless oil yield: 142 mg 95

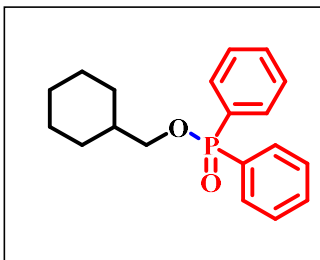

%  $^1\text{H}$  NMR (400 MHz, Chloroform-*d*)  $\delta$  7.79 - 7.74 (m, 4H), 7.46 - 7.42 (m, 2H), 7.40 - 7.34 (m, 4H), 3.77 (t,  $J = 6.3$  Hz, 2H), 1.76 - 1.59 (m, 6H), 1.24 - 1.06 (m, 3H), 0.98 - 0.88 (m, 2H).  $^{13}\text{C}$  NMR (125 MHz,  $\text{CDCl}_3$ )  $\delta$  132.0 (d,  $J_{\text{C-P}} = 2.8$  Hz), 131.7 (d,  $J_{\text{C-P}} = 136.2$  Hz), 131.6 (d,  $J_{\text{C-P}} = 10.0$  Hz), 128.5 (d,  $J_{\text{C-P}} = 12.9$  Hz), 69.7 (d,  $J_{\text{C-P}} = 6.2$  Hz), 38.5 (d,  $J_{\text{C-P}} = 6.6$  Hz), 29.4, 26.3, 25.6.  $^{31}\text{P}$  NMR (200 MHz,  $\text{CDCl}_3$ )  $\delta$  30.9. HRMS (ESI+):  $m/z$  calcd.  $\text{C}_{19}\text{H}_{23}\text{O}_2\text{P}$  For  $[\text{M}+\text{H}]^+$ : 315.1509; Found: 315.1535.

**Cyclopropylmethyl diphenylphosphinate (4ag):**<sup>24</sup>  $^1\text{H}$  NMR (500 MHz, Chloroform-*d*)

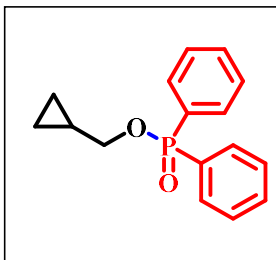

Isolated as colourless oil yield: 82 mg 60 %  $\delta$  7.83 - 7.79 (m, 4H), 7.49 - 7.46 (m, 2H), 7.43 - 7.41 (m, 4H), 3.87 (t,  $J = 7.4$  Hz, 2H), 1.19 - 1.14 (m, 1H), 0.54 - 0.49 (m, 2H), 0.27 - 0.22 (m, 2H).  $^{13}\text{C}$  NMR (125 MHz,  $\text{CDCl}_3$ )  $\delta$  131.1 (d,  $J_{\text{C-P}} = 2.8$  Hz), 130.9 (d,  $J_{\text{C-P}} = 136.1$  Hz), 130.7 (d,  $J_{\text{C-P}} = 10.0$  Hz), 127.6 (d,  $J_{\text{C-P}} = 12.9$  Hz), 69.0 (d,  $J_{\text{C-P}} = 5.8$  Hz), 10.5 (d,  $J_{\text{C-P}} = 7.0$  Hz), 2.6.  $^{31}\text{P}$  NMR (200 MHz,  $\text{CDCl}_3$ )  $\delta$  31.1.

**((1s,3s)-Adamantan-1-yl)methyl diphenylphosphinate (4ah):**<sup>21</sup> Isolated as colourless oil

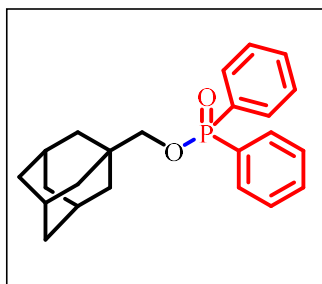

**yield: 132 mg 72 %** <sup>1</sup>H NMR (500 MHz, Chloroform-*d*) δ 7.83 – 7.77 (m, 4H), 7.51 – 7.47 (m, 2H), 7.45 – 7.40 (m, 4H), 3.57 – 3.53 (m, 2H), 2.00 – 1.96 (m, 3H), 1.71 (d, *J* = 12.0 Hz, 3H), 1.64 (d, *J* = 12.1 Hz, 3H), 1.58 (s, 6H). <sup>13</sup>C NMR (125 MHz, CDCl<sub>3</sub>) δ 132.1 (d, *J*<sub>C-P</sub> = 2.8 Hz), 131.8 (d, *J*<sub>C-P</sub> = 136.3 Hz), 131.7 (d, *J*<sub>C-P</sub> = 10.0 Hz), 128.5 (d, *J*<sub>C-P</sub> = 12.9 Hz), 74.2 (d, *J*<sub>C-P</sub> = 6.5 Hz), 39.2, 34.1 (d, *J*<sub>C-P</sub> = 7.2 Hz), 37.0, 28.1. <sup>31</sup>P NMR (200 MHz, CDCl<sub>3</sub>) δ 30.7.

**3,7-Dimethyloct-6-en-1-yl diphenylphosphinate (4ai):**<sup>20</sup> Isolated as colourless oil yield:

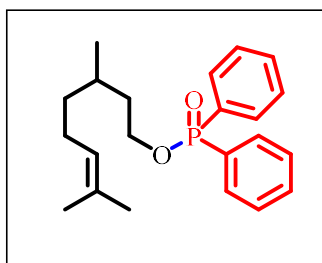

**104 mg 58 %** <sup>1</sup>H NMR (500 MHz, Chloroform-*d*) δ 7.82 – 7.76 (m, 4H), 7.51 – 7.48 (m, 2H), 7.44 – 7.40 (m, 4H), 5.06 (t, *J* = 6.7 Hz, 1H), 4.10 – 4.01 (m, 2H), 2.01 – 1.88 (m, 2H), 1.80 – 1.73 (m, 1H), 1.66 (s, 3H), 1.57 (s, 3H), 1.54 – 1.47 (m, 1H), 1.34 – 1.27 (m, 2H), 1.18 – 1.11 (m, 1H), 0.87 (d, *J* = 6.6 Hz, 3H). <sup>13</sup>C NMR (125 MHz, CDCl<sub>3</sub>) δ 132.1 (d, *J*<sub>C-P</sub> = 2.7 Hz), 131.7 (d, *J*<sub>C-P</sub> = 136.1 Hz, *J* = 1.8 Hz), 131.6 (d, *J*<sub>C-P</sub> = 10.0 Hz), 131.4, 128.7 (d, *J*<sub>C-P</sub> = 12.9 Hz), 124.6, 63.4 (d, *J*<sub>C-P</sub> = 6.0 Hz), 37.5 (d, *J*<sub>C-P</sub> = 6.6 Hz), 37.0, 29.1, 25.8, 25.4, 19.4, 17.7. <sup>31</sup>P NMR (200 MHz, CDCl<sub>3</sub>) δ 31.2.

**Phenethyl diphenylphosphinate (4aj):**<sup>10</sup> Isolated as colourless oil yield: 145 mg 90 % <sup>1</sup>H

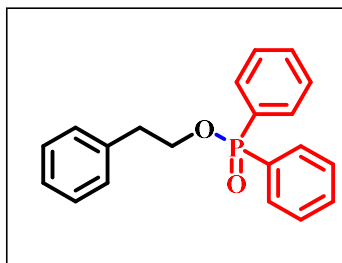

**NMR (500 MHz, Chloroform-*d*)** δ 7.72 – 7.68 (m, 4H), 7.40 – 7.47 (m, 2H), 7.41 – 7.38 (m, 4H), 7.31 – 7.28 (m, 2H), 7.26 – 7.24 (m, 1H), 7.21 – 7.19 (m, 2H), 4.24 – 4.20 (m, 2H), 3.05 – 3.02 (m, 2H). <sup>13</sup>C NMR (125 MHz, CDCl<sub>3</sub>) δ 137.6, 132.2 (d, *J*<sub>C-P</sub> = 2.8 Hz), 131.6 (d, *J*<sub>C-P</sub> = 10.0 Hz), 131.4 (d, *J*<sub>C-P</sub> = 136.2 Hz), 129.2, 128.6, 128.5 (d, *J*<sub>C-P</sub> = 4.5 Hz), 126.7, 65.4 (d, *J*<sub>C-P</sub> = 5.9 Hz), 37.2 (d, *J*<sub>C-P</sub> = 6.9 Hz). <sup>31</sup>P NMR (200 MHz, CDCl<sub>3</sub>) δ 31.6.

**4-Methylbenzyl bis(4-methoxyphenyl)phosphinate (4ak):** Isolated as Colourless

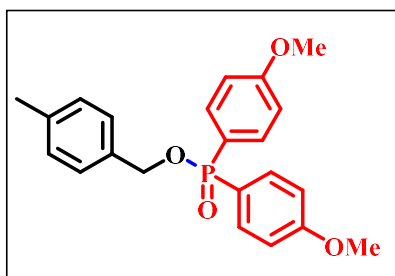

**Colourless oil yield: 134 mg 70 %** <sup>1</sup>H NMR (400 MHz, Chloroform-*d*) δ 7.75 – 7.70 (m, 4H), 7.24 (d, *J* = 8.0 Hz, 2H), 7.14 (d, *J* = 7.8 Hz, 2H), 6.93 (d, *J* = 2.6 Hz, 2H), 6.91 (d, *J* = 2.6 Hz, 2H), 4.97 (d, *J* = 6.6 Hz, 2H), 3.82 (s, 6H), 2.34 (s, 3H). <sup>13</sup>C NMR (125 MHz, CDCl<sub>3</sub>) δ 162.6 (d, *J*<sub>C-P</sub> = 2.9 Hz), 138.1, 133.8, 133.7 (d, *J*<sub>C-P</sub> = 11.3 Hz), 129.3, 128.1, 123.2 (d, *J*<sub>C-P</sub> = 143.4 Hz), 114.1 (d, *J*<sub>C-P</sub> = 14.0 Hz), 66.0 (d, *J*<sub>C-P</sub> = 5.4 Hz), 55.4, 21.3. <sup>31</sup>P NMR (200 MHz, CDCl<sub>3</sub>) δ 33.03. HRMS (ESI<sup>+</sup>): *m/z* calcd.

C<sub>22</sub>H<sub>23</sub>O<sub>4</sub>P For [M+H]<sup>+</sup>: 383.1407; Found: 383.1377.

**4-Methylbenzyl di-p-tolylphosphinate (4al): Isolated as Colourless oil yield:**

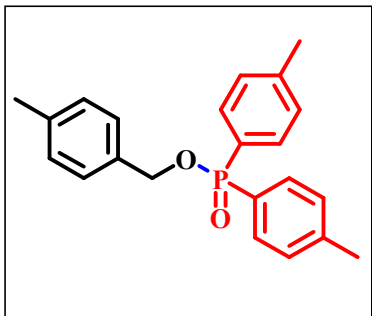

**126 mg 72 % <sup>1</sup>H NMR (400 MHz, Chloroform-*d*)** δ 7.73 – 7.68 (m, 4H), 7.26 – 7.22 (m, 6H), 7.16 – 7.14 (m, 2H), 4.99 (d, *J* = 6.5 Hz, 2H), 2.37 (s, 6H), 2.34 (s, 3H). **<sup>13</sup>C NMR (125 MHz, CDCl<sub>3</sub>)** δ 141.7 (d, *J*<sub>C-P</sub> = 2.8 Hz), 138.1, 133.7 (d, *J*<sub>C-P</sub> = 7.7 Hz), 131.8 (d, *J*<sub>C-P</sub> = 10.5 Hz), 129.4, 129.3 (d, *J*<sub>C-P</sub> = 2.7 Hz), 128.4 (d, *J*<sub>C-P</sub> = 138.4 Hz), 120.1, 66.2 (d, *J*<sub>C-P</sub> = 5.5 Hz), 21.7, 21.3. **<sup>31</sup>P NMR (200 MHz, CDCl<sub>3</sub>)** δ 33.2. **HRMS (ESI<sup>+</sup>):** *m/z* calcd. C<sub>22</sub>H<sub>23</sub>O<sub>2</sub>P For [M+H]<sup>+</sup>: 351.1509; Found: 351.1483.

**Decyl di(naphthalen-2-yl)phosphinate (4am): <sup>1</sup>H NMR (500 MHz, Chloroform-*d*)** δ 8.50

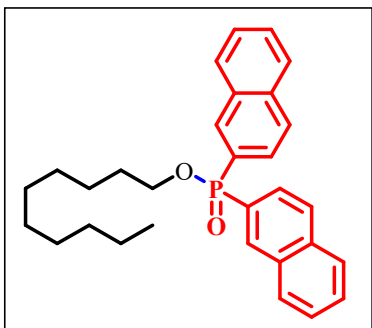

(d, *J* = 2.3 Hz, 2H), 7.96 – 7.88 (m, 4H), 7.86 – 7.78 (m, 4H), 7.59 – 7.52 (m, 4H), 4.11 (q, *J* = 6.7 Hz, 2H), 1.80 – 1.75 (m, 2H), 1.45 – 1.39 (m, 14H), 0.89 – 0.85 (m, 3H). **<sup>13</sup>C NMR (125 MHz, CDCl<sub>3</sub>)** δ 135.0 (d, *J*<sub>C-P</sub> = 2.4 Hz), 134.0 (d, *J*<sub>C-P</sub> = 9.8 Hz), 132.6 (d, *J*<sub>C-P</sub> = 14.3 Hz), 129.1, 128.9 (d, *J*<sub>C-P</sub> = 137 Hz), 128.5 (d, *J*<sub>C-P</sub> = 12.6 Hz), 128.3, 127.9, 127.0, 126.5 (d, *J*<sub>C-P</sub> = 10.7 Hz), 65.4 (d, *J*<sub>C-P</sub> = 6.1 Hz), 32.0, 30.7 (d, *J*<sub>C-P</sub> = 6.5 Hz), 29.8, 29.6, 29.4, 29.3, 25.8, 22.8, 14.2. **<sup>31</sup>P NMR (200 MHz, CDCl<sub>3</sub>)** δ 31.44. **HRMS (ESI<sup>+</sup>):** *m/z* calcd. C<sub>30</sub>H<sub>35</sub>O<sub>2</sub>P For [M+H]<sup>+</sup>: 459.2448; Found: 459.2437.

**4-Methylbenzyl bis(benzo[d][1,3]dioxol-5-yl)phosphinate (4an): Isolated as Colourless**

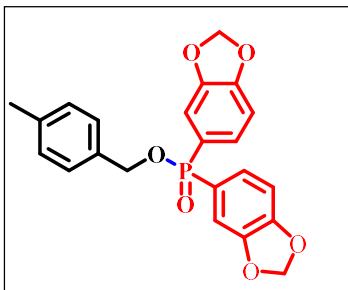

**Colourless oil yield: 140 mg 68 % <sup>1</sup>H NMR (500 MHz, Chloroform-*d*)** δ 7.38 – 7.33 (m, 2H), 7.24 (d, *J* = 7.9 Hz, 2H), 7.20 (s, 1H), 7.17 – 7.14 (m, 3H), 6.86 – 6.84 (m, 2H), 5.99 (s, 4H), 4.98 (d, *J* = 6.7 Hz, 2H), 2.34 (s, 3H). **<sup>13</sup>C NMR (125 MHz, CDCl<sub>3</sub>)** δ 151.1 (d, *J*<sub>C-P</sub> = 3.1 Hz), 148.1 (d, *J*<sub>C-P</sub> = 19.8 Hz), 138.3, 133.4 (d, *J*<sub>C-P</sub> = 7.4 Hz), 129.4, 128.2, 127.3 (d, *J*<sub>C-P</sub> = 11.0 Hz), 125.8 (d, *J*<sub>C-P</sub> = 142.0 Hz), 111.2 (d, *J*<sub>C-P</sub> = 12.7 Hz), 108.8 (d, *J*<sub>C-P</sub> = 16.4 Hz), 101.7, 66.4 (d, *J*<sub>C-P</sub> = 5.5 Hz), 21.3. **<sup>31</sup>P NMR (200 MHz, CDCl<sub>3</sub>)** δ 32.0. **HRMS (ESI<sup>+</sup>):**

*m/z* calcd. C<sub>22</sub>H<sub>23</sub>O<sub>3</sub>P For [M+H]<sup>+</sup>: 411.0993; Found: 411.0974.

**4-Methylbenzyl di(thiophen-2-yl)phosphinate (4ao): Isolated as Colourless Colourless oil**

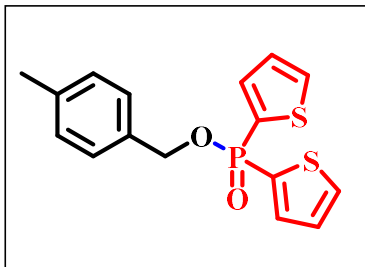

**yield: 107 mg 64 %**  $^1\text{H NMR}$  (400 MHz, Chloroform-*d*)  $\delta$  7.70 – 7.64 (m, 4H), 7.27 – 7.25 (m, 2H), 7.16 – 7.13 (m, 4H), 5.09 (d,  $J = 7.4$  Hz, 2H), 2.34 (s, 3H).  $^{13}\text{C NMR}$  (125 MHz,  $\text{CDCl}_3$ )  $\delta$  138.3, 136.7 (d,  $J_{\text{C-P}} = 12.0$  Hz), 134.0 (d,  $J_{\text{C-P}} = 6.4$  Hz), 133.0 (d,  $J_{\text{C-P}} = 7.8$  Hz), 132.1 (d,  $J_{\text{C-P}} = 162.1$  Hz), 129.3, 128.4 (d,  $J_{\text{C-P}} = 16.4$  Hz), 128.1, 67.1 (d,  $J_{\text{C-P}} = 5.4$  Hz), 21.3.  $^{31}\text{P NMR}$  (200 MHz,  $\text{CDCl}_3$ )  $\delta$  19.1. **HRMS (ESI+):**  $m/z$  calcd.  $\text{C}_{22}\text{H}_{23}\text{O}_3\text{P}$  For  $[\text{M}+\text{H}]^+$ : 367.1458; Found: 367.1456.

**4-Methylbenzyl bis(4-fluorophenyl)phosphinate (4ap): Isolated as Colourless Colourless oil yield: 111 mg 62 %**

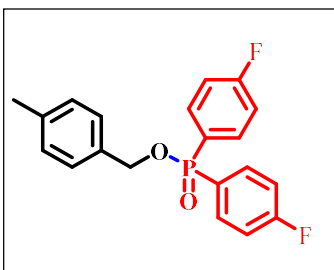

$^1\text{H NMR}$  (400 MHz, Chloroform-*d*)  $\delta$  7.83 – 7.76 (m, 4H), 7.23 – 7.21 (m, 2H), 7.16 – 7.10 (m, 6H), 5.01 (d,  $J = 7.1$  Hz, 2H), 2.34 (s, 3H).  $^{13}\text{C NMR}$  (125 MHz,  $\text{CDCl}_3$ )  $\delta$  165.4 (dd,  $J_{\text{C-F}} = 252.4$  Hz,  $J_{\text{C-P}} = 3.3$  Hz), 138.5, 134.4 (dd,  $J_{\text{C-F}} = 11.7$  Hz,  $J_{\text{C-P}} = 8.9$  Hz), 133.1 (d,  $J_{\text{C-P}} = 7.1$  Hz), 129.4, 128.3, 127.4 (dd,  $J_{\text{C-F}} = 140.6$  Hz,  $J_{\text{C-P}} = 3.4$  Hz), 116.1 (dd,  $J_{\text{C-F}} = 21.3$  Hz,  $J_{\text{C-P}} = 14.3$  Hz), 66.7 (d,  $J_{\text{C-P}} = 5.4$  Hz), 21.3.  $^{31}\text{P NMR}$  (200 MHz,  $\text{CDCl}_3$ )  $\delta$  30.3.  $^{19}\text{F NMR}$  (471 MHz,  $\text{CDCl}_3$ )  $\delta$  -105.9. **HRMS (ESI+):**  $m/z$  calcd.  $\text{C}_{20}\text{H}_{18}\text{O}_2\text{F}_2\text{P}$  For

$[\text{M}+\text{H}]^+$ : 359.1007; Found: 359.1020.

**Decyl di-*p*-tolylphosphinate (4aq):**  $^1\text{H NMR}$  (400 MHz, Chloroform-*d*)  $\delta$  7.69 – 7.64 (m,

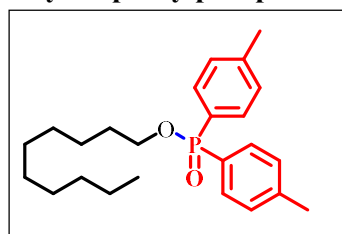

4H), 7.24 – 7.21 (m, 4H), 4.00 – 3.95 (m, 2H), 2.36 (m, 6H), 1.72 – 1.65 (m, 2H), 1.39 – 1.32 (m, 2H), 1.27 – 1.23 (m, 12H), 0.86 (t,  $J = 6.5$  Hz, 3H).  $^{13}\text{C NMR}$  (126 MHz,  $\text{CDCl}_3$ )  $\delta$  142.5 (d,  $J_{\text{C-P}} = 2.8$  Hz), 131.7 (d,  $J_{\text{C-P}} = 10.45$  Hz), 129.3 (d,  $J_{\text{C-P}} = 13.3$  Hz), 128.7 (d,  $J_{\text{C-P}} = 138.8$  Hz), 64.9 (d,  $J_{\text{C-P}} = 6.0$  Hz), 32.0, 30.6 (d,  $J_{\text{C-P}} = 6.5$  Hz), 29.6 (d,  $J_{\text{C-P}} = 2.1$  Hz), 29.4, 29.3, 25.7, 22.8, 21.7,

14.2.  $^{31}\text{P NMR}$  (200 MHz,  $\text{CDCl}_3$ )  $\delta$  32.1.

**Decyl di(thiophen-2-yl)phosphinate (4ar): Isolated as Colourless Colourless oil yield: 145**

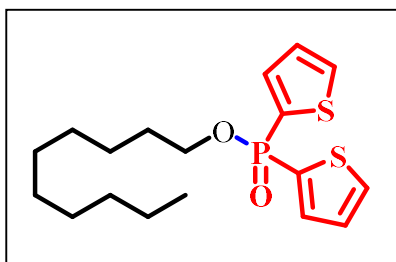

**mg 78 %**  $^1\text{H NMR}$  (500 MHz, Chloroform-*d*)  $\delta$  7.69 (t,  $J = 4.6$  Hz, 2H), 7.65 – 7.63 (m, 2H), 7.17 – 7.13 (m, 2H), 4.08 (q,  $J = 6.8$  Hz, 2H), 1.74 – 1.69 (m, 2H), 1.39 – 1.35 (m, 2H), 1.27 – 1.21 (m, 12H), 0.87 (t,  $J = 6.9$  Hz, 3H).  $^{13}\text{C NMR}$  (125 MHz,  $\text{CDCl}_3$ )  $\delta$  135.5 (d,  $J_{\text{C-P}} = 12.1$  Hz), 132.8 (d,  $J_{\text{C-P}} = 6.4$  Hz), 131.4 (d,  $J_{\text{C-P}} = 162.1$  Hz), 127.3 (d,  $J_{\text{C-P}} = 16.4$  Hz), 65.1 (d,  $J_{\text{C-P}} = 6.0$  Hz), 31.0, 29.5 (d,  $J_{\text{C-P}} = 7.1$  Hz), 28.8, 28.6 (d,  $J_{\text{C-P}} = 2.6$  Hz), 28.4, 28.2, 24.6, 21.8, 13.2.  $^{31}\text{P NMR}$  (200 MHz,  $\text{CDCl}_3$ )  $\delta$  18.3. HRMS (ESI+):  $m/z$  calcd.  $\text{C}_{22}\text{H}_{23}\text{O}_3\text{P}$  For  $[\text{M}+\text{Na}]^+$ : 393.1083; Found: 393.1047

**Decyl bis(4-methoxyphenyl)phosphinate (4as): Isolated as Colourless Colourless oil yield:**

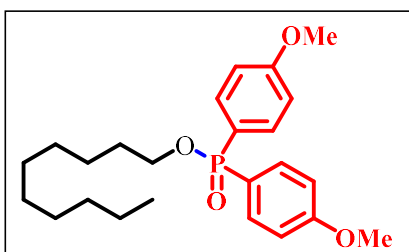

**168 mg 80 %**  $^1\text{H NMR}$  (500 MHz, Chloroform-*d*)  $\delta$  7.72 – 7.68 (m, 4H), 6.94 – 6.91 (m, 4H), 3.96 (q,  $J = 6.7$  Hz, 2H), 3.82 (s, 6H), 1.71 – 1.65 (m, 2H), 1.37 – 1.34 (m, 2H), 1.27 – 1.20 (m, 12H), 0.87 (t,  $J = 6.9$  Hz, 3H).  $^{13}\text{C NMR}$  (125 MHz,  $\text{CDCl}_3$ )  $\delta$  162.6 (d,  $J_{\text{C-P}} = 2.8$  Hz), 133.6 (d,  $J_{\text{C-P}} = 11.4$  Hz), 123.5 (d,  $J_{\text{C-P}} = 143.6$  Hz), 114.1 (d,  $J_{\text{C-P}} = 13.8$  Hz), 64.8 (d,  $J_{\text{C-P}} = 5.8$  Hz), 55.4, 32.0, 30.7 (d,  $J_{\text{C-P}} = 6.8$  Hz), 29.6 (d,  $J_{\text{C-P}} = 1.8$  Hz), 29.4, 29.3, 25.8, 22.7, 14.2.  $^{31}\text{P NMR}$  (200 MHz,  $\text{CDCl}_3$ )  $\delta$  31.9 HRMS (ESI+):  $m/z$  calcd.  $\text{C}_{24}\text{H}_{35}\text{O}_4\text{P}$  For  $[\text{M}+\text{H}]^+$ : 419.1822; Found: 419.1810.

**(4-Methylbenzyl)diphenylphosphine sulphide**  $^1\text{H NMR}$  (500 MHz, Chloroform-*d*)  $\delta$  7.81

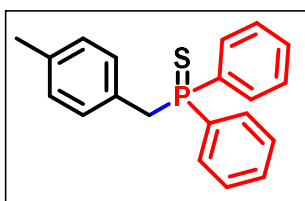

42.0.

– 7.77 (m, 4H), 7.52 – 7.48 (m, 2H), 7.45 – 7.41 (m, 4H), 6.97 – 6.96 (m, 2H), 6.88 – 6.86 (m, 2H), 3.81 (d,  $J = 13.3$  Hz, 2H), 2.27 (d,  $J = 2.4$  Hz, 3H).  $^{13}\text{C NMR}$  (126 MHz,  $\text{CDCl}_3$ )  $\delta$  135.9 (d,  $J_{\text{C-P}} = 4.0$  Hz), 131.4 (d,  $J_{\text{C-P}} = 79.4$  Hz), 130.7 (d,  $J_{\text{C-P}} = 9.6$  Hz), 130.6 (d,  $J_{\text{C-P}} = 3.0$  Hz), 129.4 (d,  $J_{\text{C-P}} = 5.3$  Hz), 127.8 (d,  $J_{\text{C-P}} = 3.2$  Hz), 127.6 (d,  $J_{\text{C-P}} = 11.9$  Hz), 126.6 (d,  $J_{\text{C-P}} = 7.7$  Hz), 39.6 (d,  $J_{\text{C-P}} = 50.6$  Hz), 20.2.  $^{31}\text{P NMR}$  (200 MHz,  $\text{CDCl}_3$ )  $\delta$

**(4-Methylbenzyl)diphenylphosphane**  $^1\text{H NMR}$  (500 MHz, Chloroform-*d*)  $\delta$  7.44 – 7.40 (m,

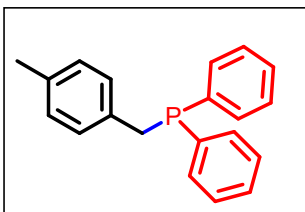

4H), 7.34 – 7.31 (m, 6H), 7.02 – 7.00 (m, 2H), 6.98 – 6.96 (m, 2H), 3.40 (s, 2H), 2.30 (m, 3H).  $^{13}\text{C NMR}$  (126 MHz,  $\text{CDCl}_3$ )  $\delta$  138.4 (d,  $J_{\text{C-P}} = 14.9$  Hz), 135.4 (d,  $J_{\text{C-P}} = 2.8$  Hz), 134.4 (d,  $J_{\text{C-P}} = 8.2$  Hz), 133.0 (d,  $J_{\text{C-P}} = 18.2$  Hz), 129. (d,  $J_{\text{C-P}} = 6.6$  Hz), 129.1 (d,  $J_{\text{C-P}} = 1.6$  Hz), 128.8, 128.4 (d,  $J_{\text{C-P}} = 6.4$  Hz), 35.6 (d,  $J_{\text{C-P}} = 15.0$  Hz), 21.1.  $^{31}\text{P NMR}$  (200 MHz,  $\text{CDCl}_3$ )  $\delta$  -10.2. HRMS (ESI+):  $m/z$  calcd.  $\text{C}_{20}\text{H}_{19}\text{P}$  For  $[\text{M}+\text{H}]^+$ : 291.1298; Found: 291.1288.

**(E)-1-Methyl-4-styrylbenzene**  $^1\text{H}$  NMR (400 MHz, Chloroform-*d*)  $\delta$  7.44 – 7.41 (m, 2H), 7.35 – 7.33 (m, 2H), 7.29 – 7.25 (m, 2H), 7.19 – 7.14 (m, 2H), 7.10 – 7.07 (m, 2H), 7.00 – 6.99 (m, 2H), 2.28 (s, 3H).  $^{13}\text{C}$  NMR (126 MHz,  $\text{CDCl}_3$ )  $\delta$  137.7, 137.6, 134.7, 129.5, 128.8, 128.7, 127.8, 127.5, 126.6, 126.5, 21.4.

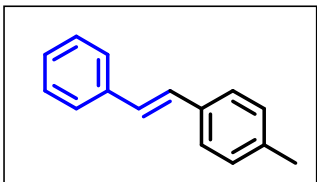

**(E)-1,2-Di-p-tolylolethene**  $^1\text{H}$  NMR (400 MHz, Chloroform-*d*)  $\delta$  7.41 – 7.39 (m, 4H), 7.17 – 7.15 (m, 4H), 7.04 (s, 2H), 2.36 (s, 6H).  $^{13}\text{C}$  NMR (126 MHz,  $\text{CDCl}_3$ )  $\delta$  137.42, 134.88, 129.51, 127.78, 126.45, 21.4.

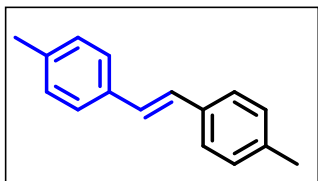

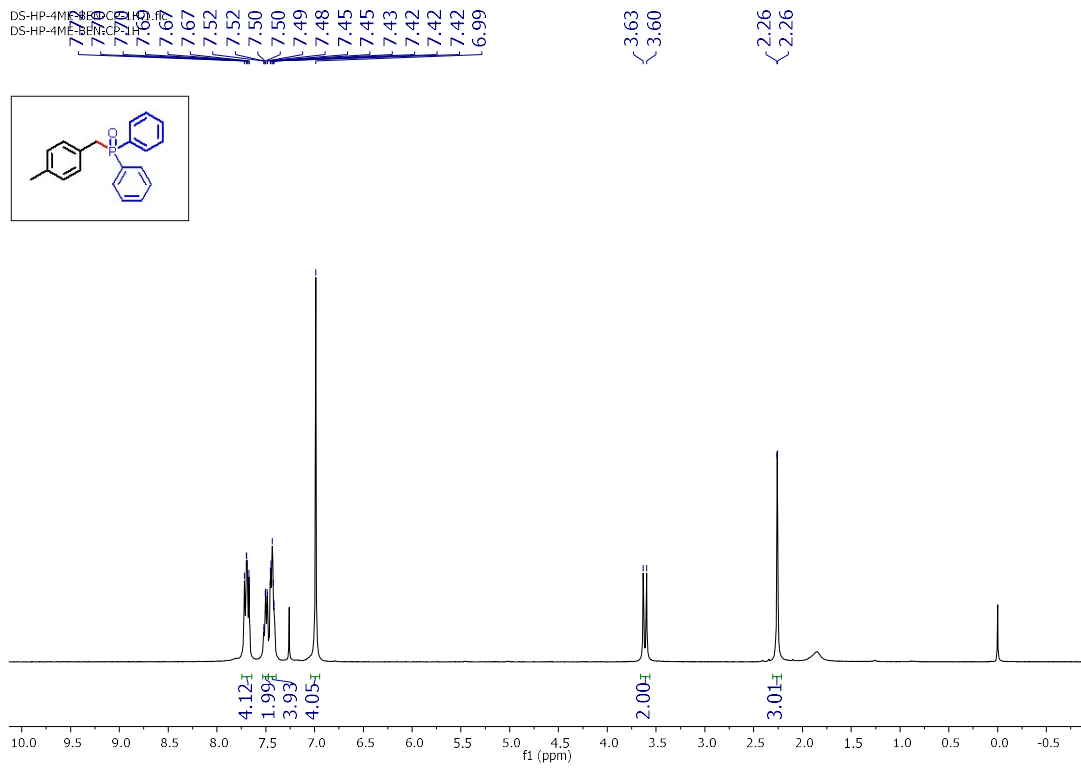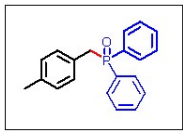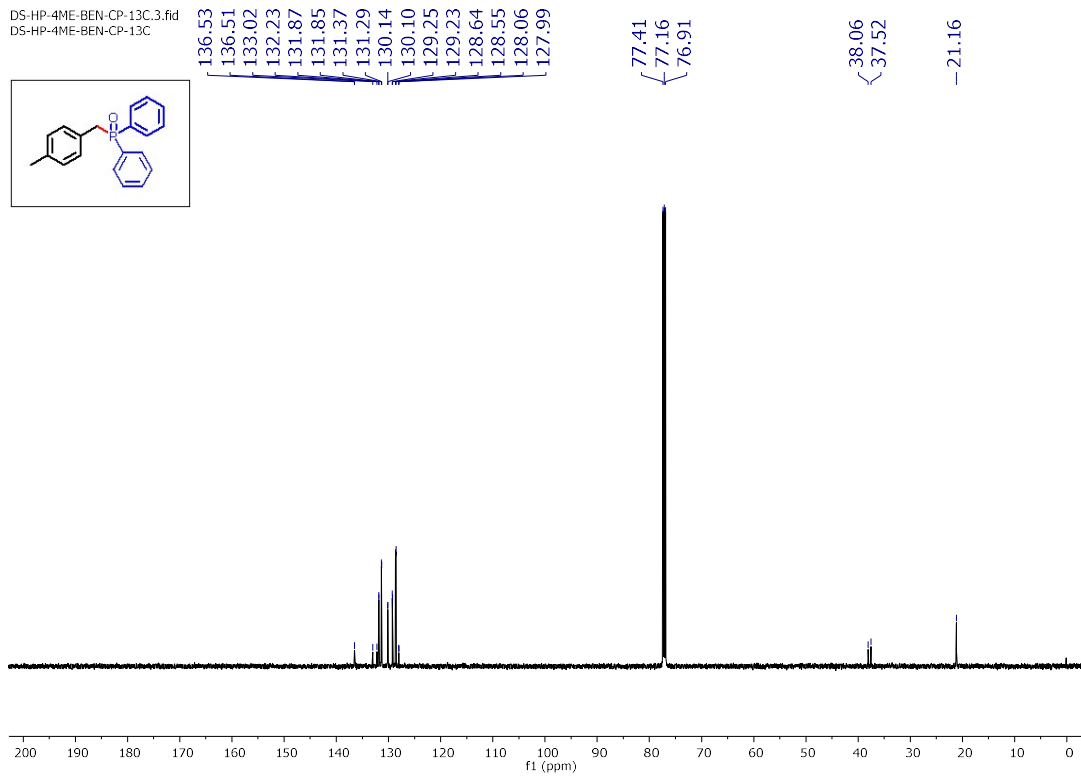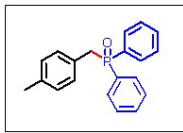

DS-HP-4ME-BEN-CP-31P.5.fid  
DS-HP-4ME-BEN-CP-31P

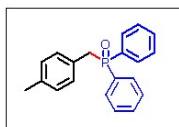

-29.39

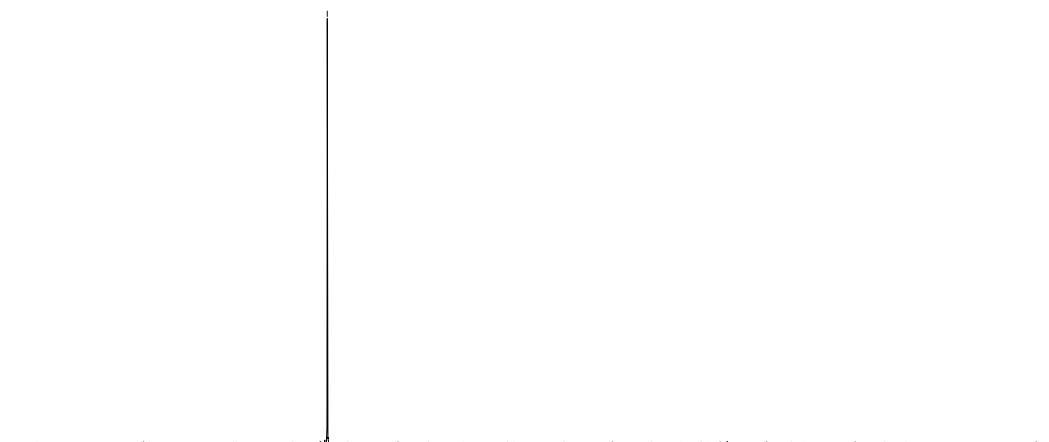

Figure S4:  $^1\text{H}$  NMR (400 MHz),  $^{13}\text{C}\{^1\text{H}\}$  NMR (125 MHz) and  $^{31}\text{P}\{^1\text{H}\}$  NMR (200 MHz) spectrum of Compound 3a in  $\text{CDCl}_3$

DS-HP-668-P3-1H  
DS-HP-668-P3-1H

7.71  
7.69  
7.67  
7.51  
7.50  
7.48  
7.44  
7.42  
7.41  
7.18  
7.16  
7.11  
7.09

3.67  
3.63

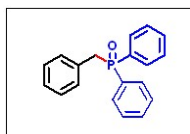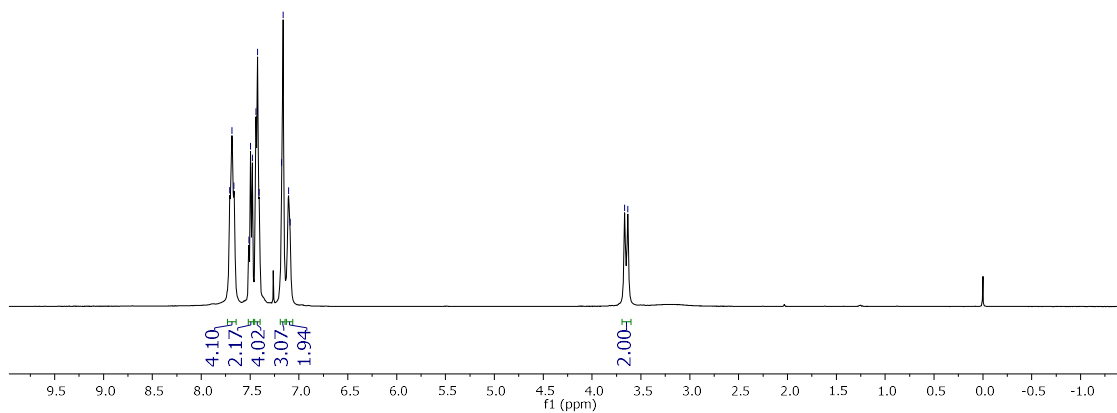

DS-HP-668-13C.5.fid  
DS-HP-668-13C

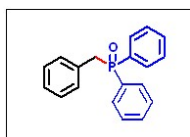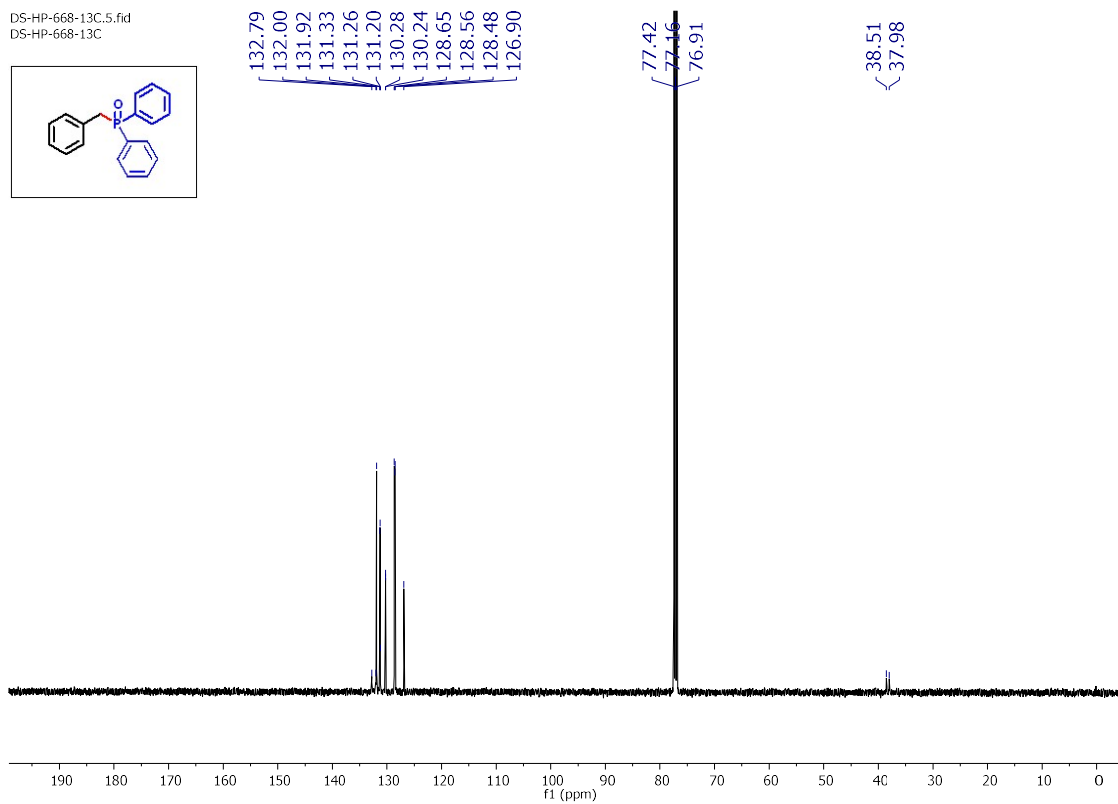

DS-HP-668-31P.3.fid  
DS-HP-668-31P

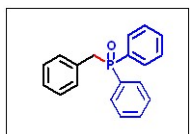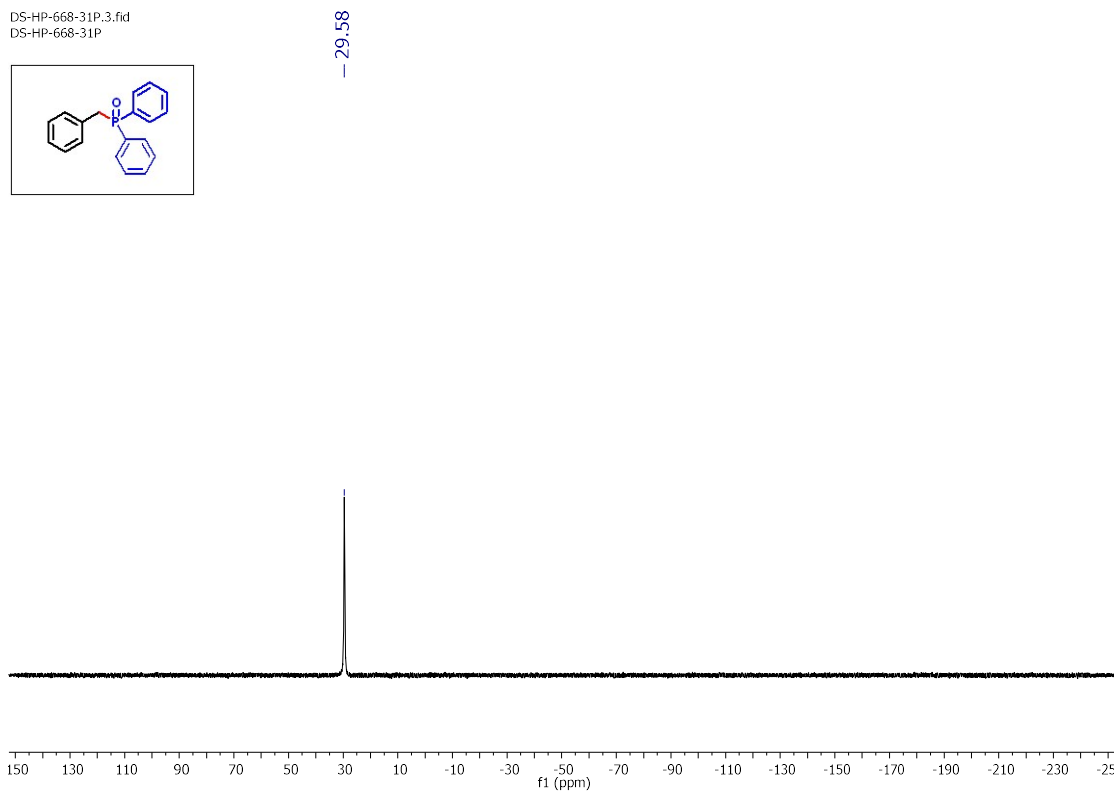

Figure S5:  $^1\text{H}$  NMR (400 MHz),  $^{13}\text{C}\{^1\text{H}\}$  NMR (125 MHz) and  $^{31}\text{P}\{^1\text{H}\}$  NMR (200 MHz) spectrum of Compound 3b in  $\text{CDCl}_3$

DS-HP-CP-40ME-1H.3.fid  
 DS-HP-CP-40ME-1H

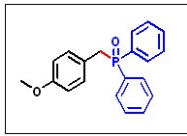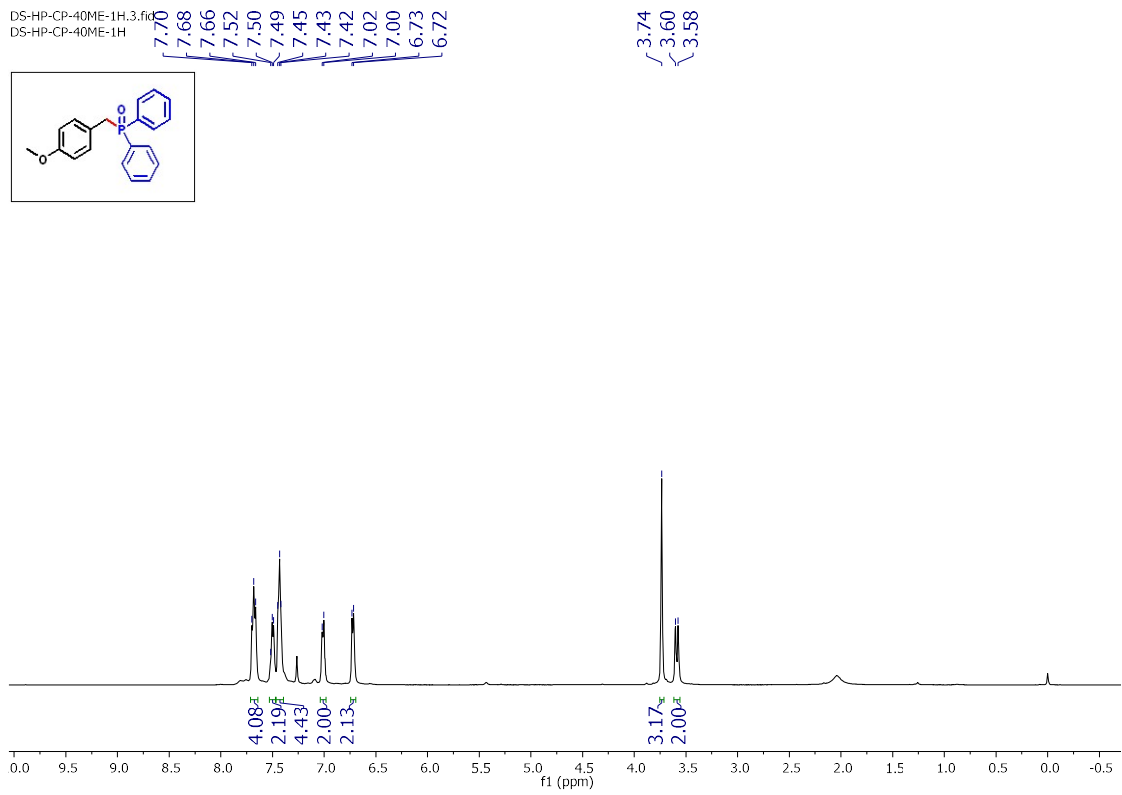

DS-HP-CP-40ME-13C.1.fid  
 DS-HP-CP-40ME-13C

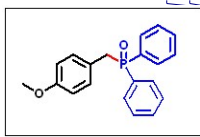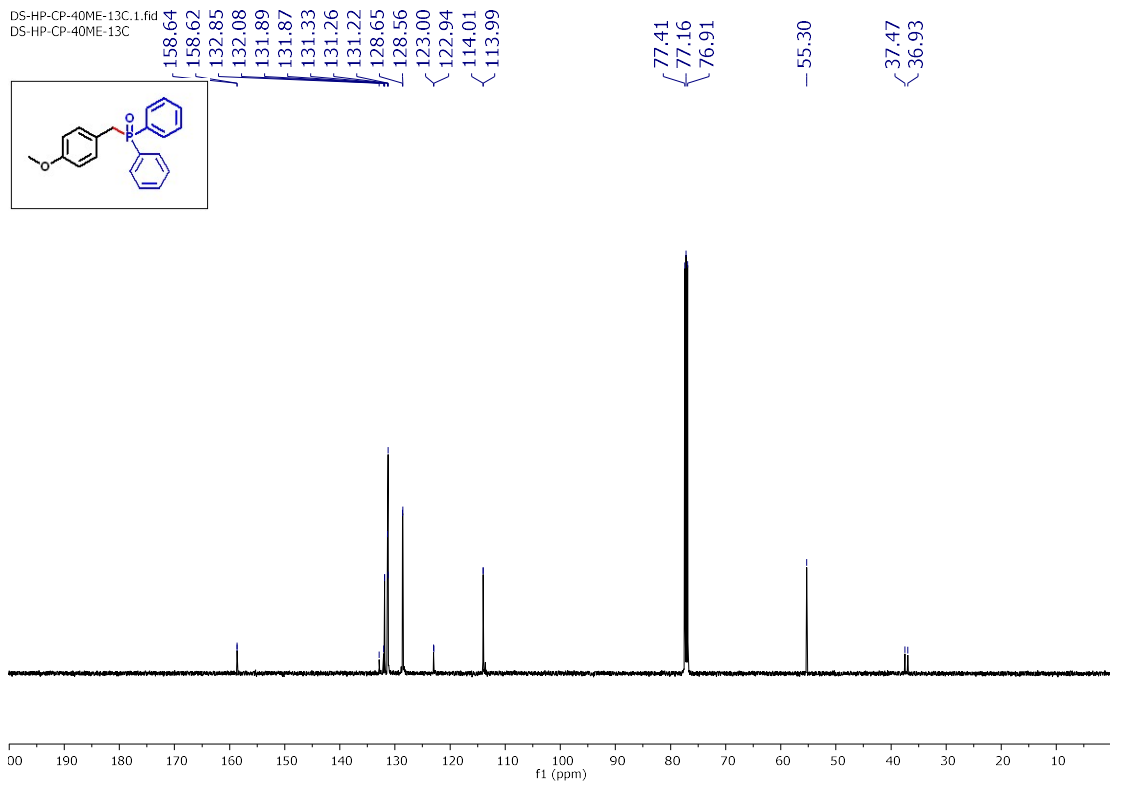

DS-HP-CP-40ME-31P.5.fid  
DS-HP-CP-40ME-31P

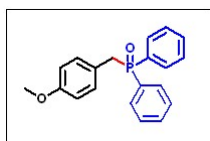

- 29.62

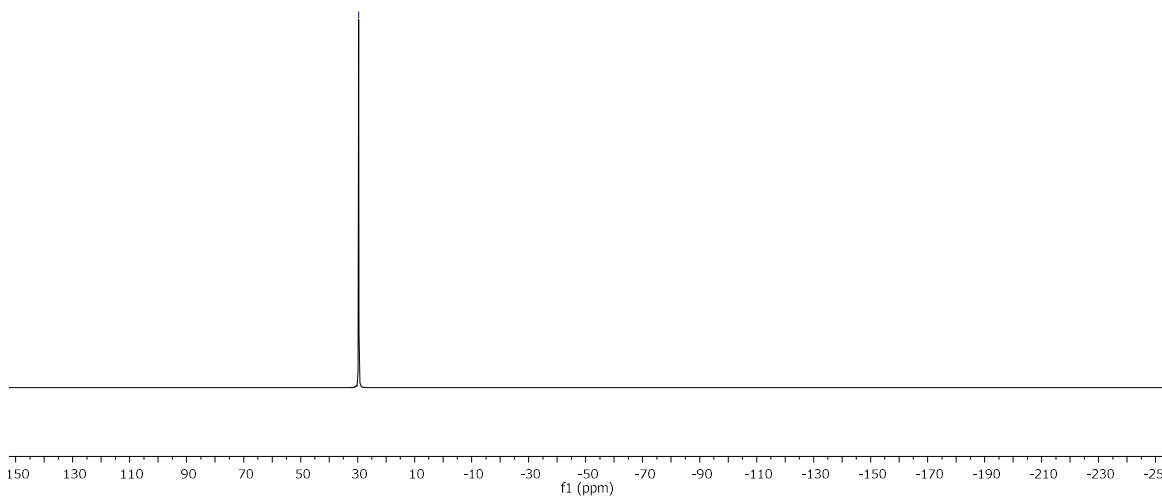

Figure S6.  $^1\text{H}$  NMR (500 MHz),  $^{13}\text{C}\{^1\text{H}\}$  NMR (125 MHz) and  $^{31}\text{P}\{^1\text{H}\}$  NMR (200 MHz) spectrum of Compound 3c in  $\text{CDCl}_3$

DS-791-F-1H.1.fid  
DS-791-F-1H

7.72  
7.70  
7.68  
7.53  
7.51  
7.50  
7.45  
7.44  
7.42  
7.21  
7.20  
7.04  
7.02

3.64  
3.62

-1.25

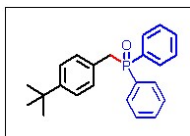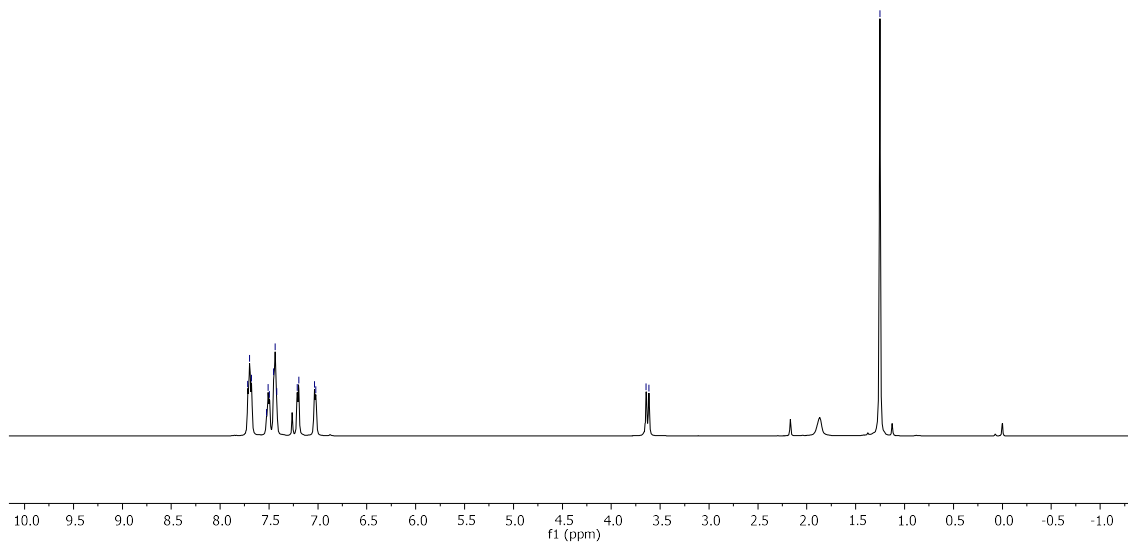

DS-791-F-13C.3.fid  
DS-791-F-13C

149.79  
149.76  
132.95  
132.16  
131.89  
131.87  
131.35  
131.28  
129.93  
129.89  
128.64  
128.55  
128.01  
127.95  
125.52  
125.50  
77.41  
77.16  
76.91

37.85  
37.32  
34.51  
31.41

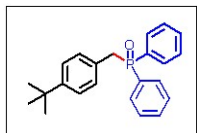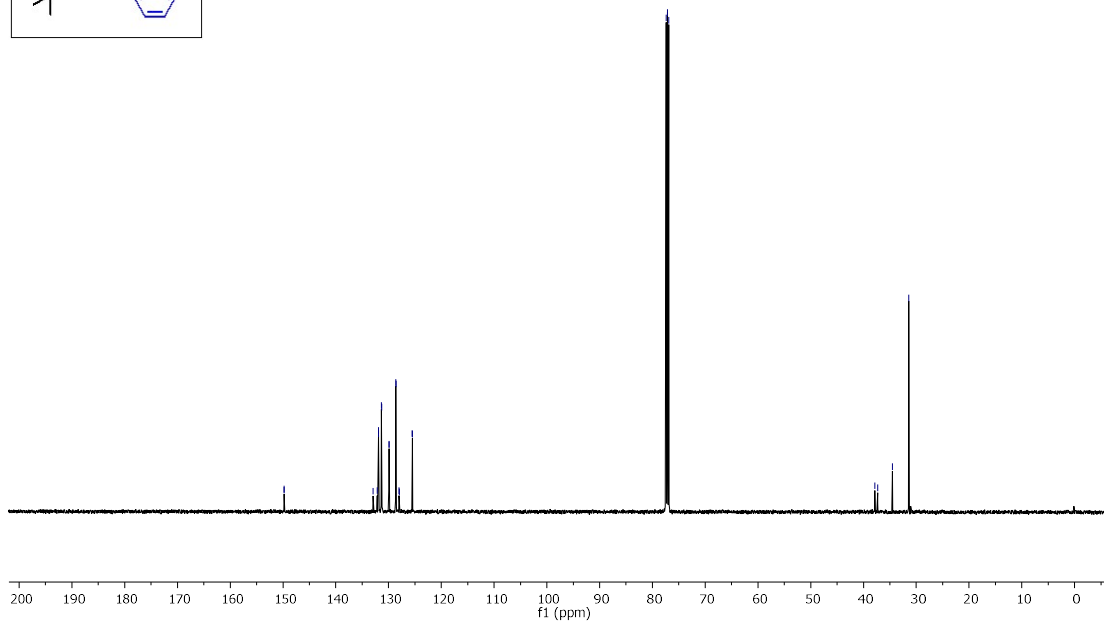

DS-791-F-31P.5.fic  
DS-791-F-31P

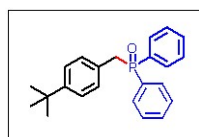

-29.72

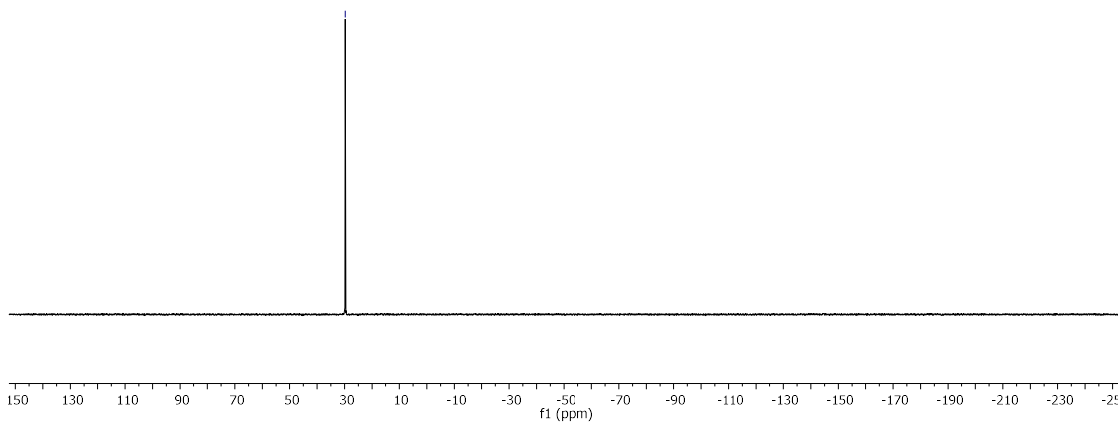

Figure S7.  $^1\text{H}$  NMR (500 MHz),  $^{13}\text{C}\{^1\text{H}\}$  NMR (125 MHz) and  $^{31}\text{P}\{^1\text{H}\}$  NMR (200 MHz) spectrum of Compound 3f in  $\text{CDCl}_3$

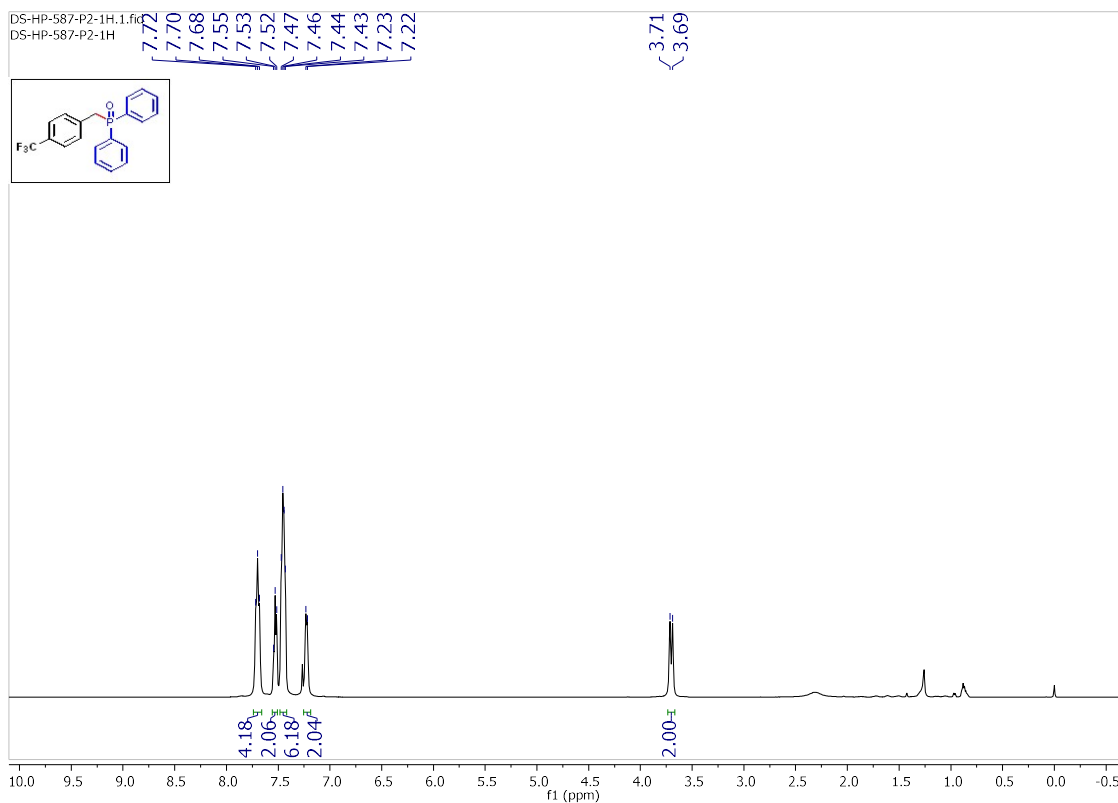

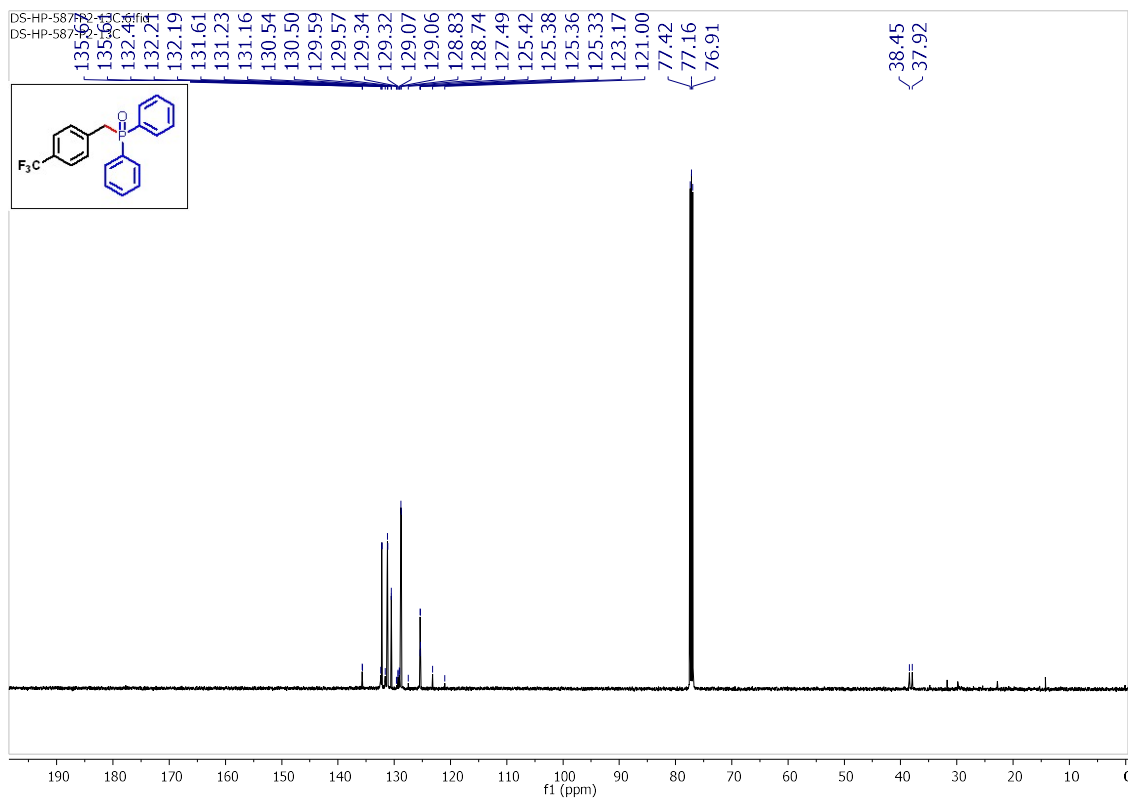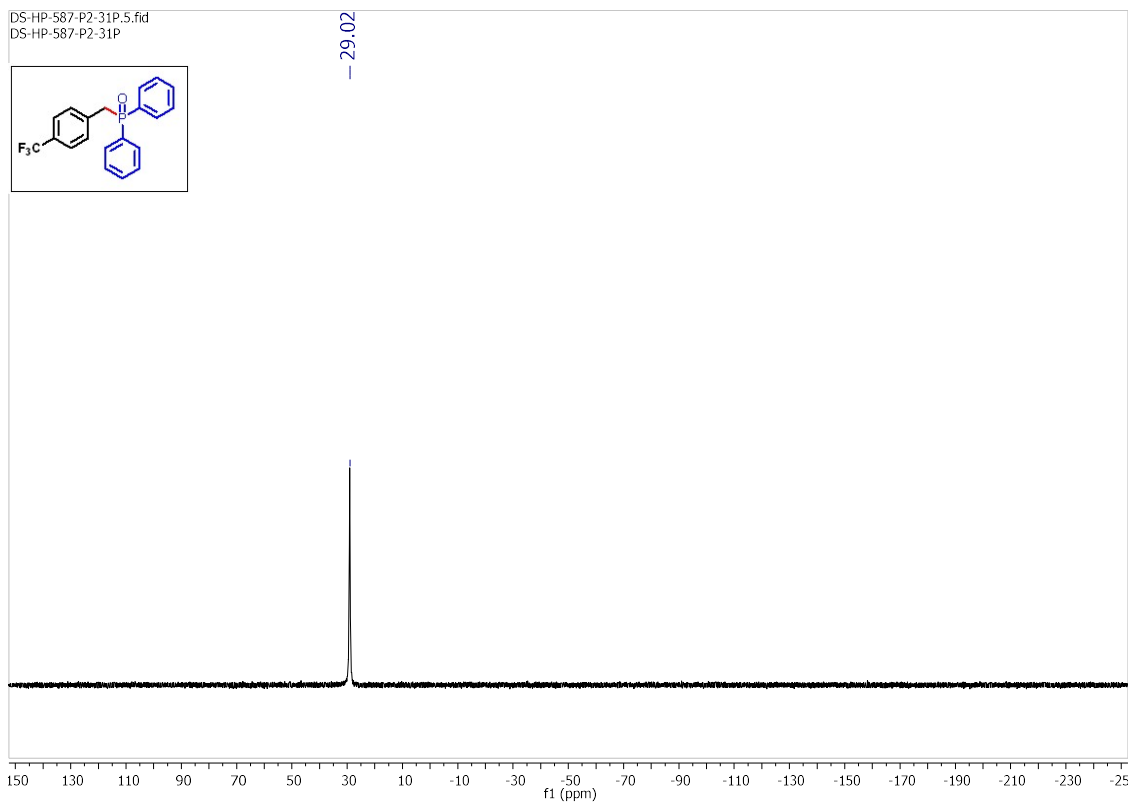

D5-RD-128-19F.12.fid  
D5-RD-128-19F

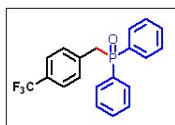

--62.53

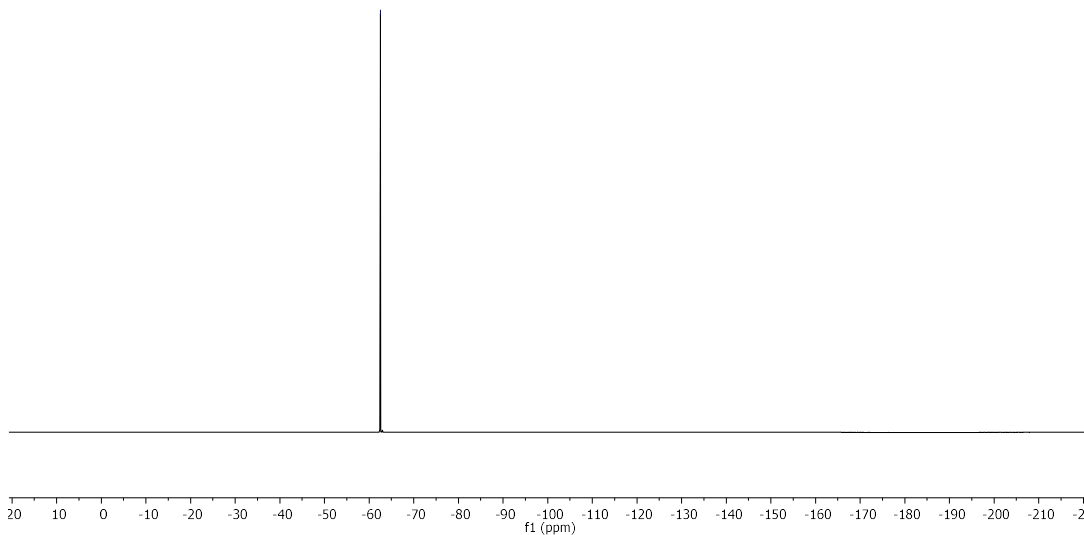

Figure S8.  $^1\text{H}$  NMR (500 MHz),  $^{13}\text{C}\{^1\text{H}\}$  NMR (125 MHz),  $^{31}\text{P}$  and  $^{19}\text{F}\{^1\text{H}\}$  NMR (200 MHz) spectrum of Compound 3g in  $\text{CDCl}_3$

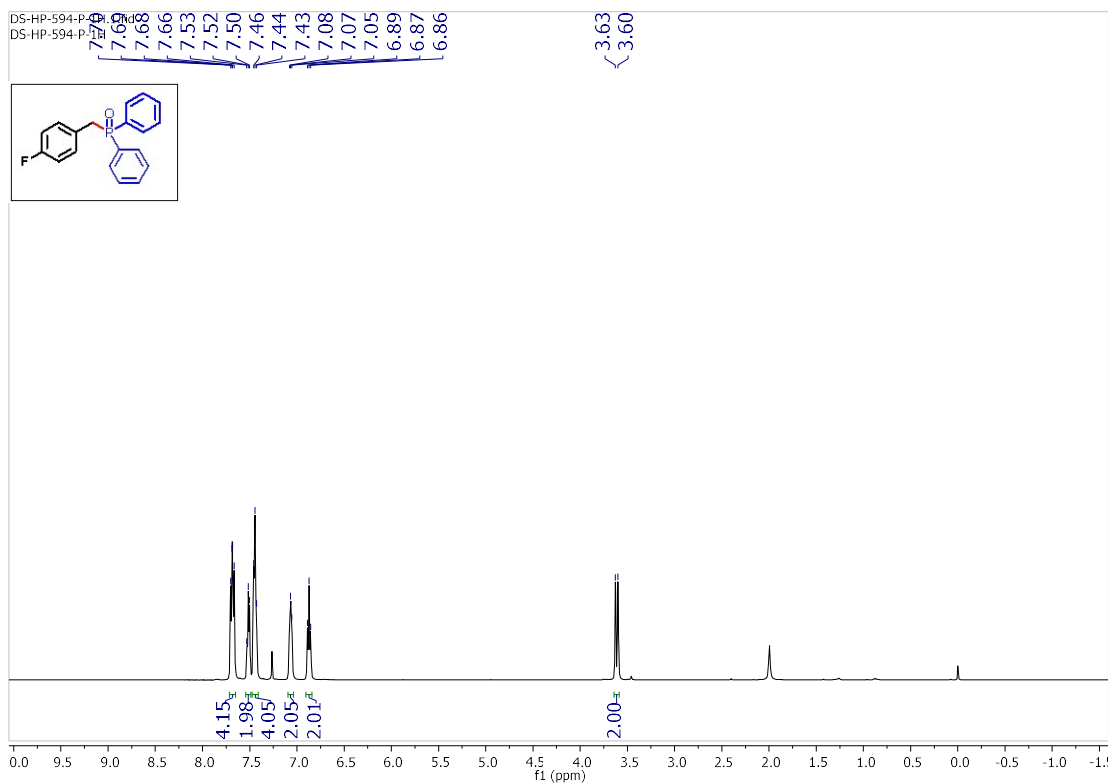

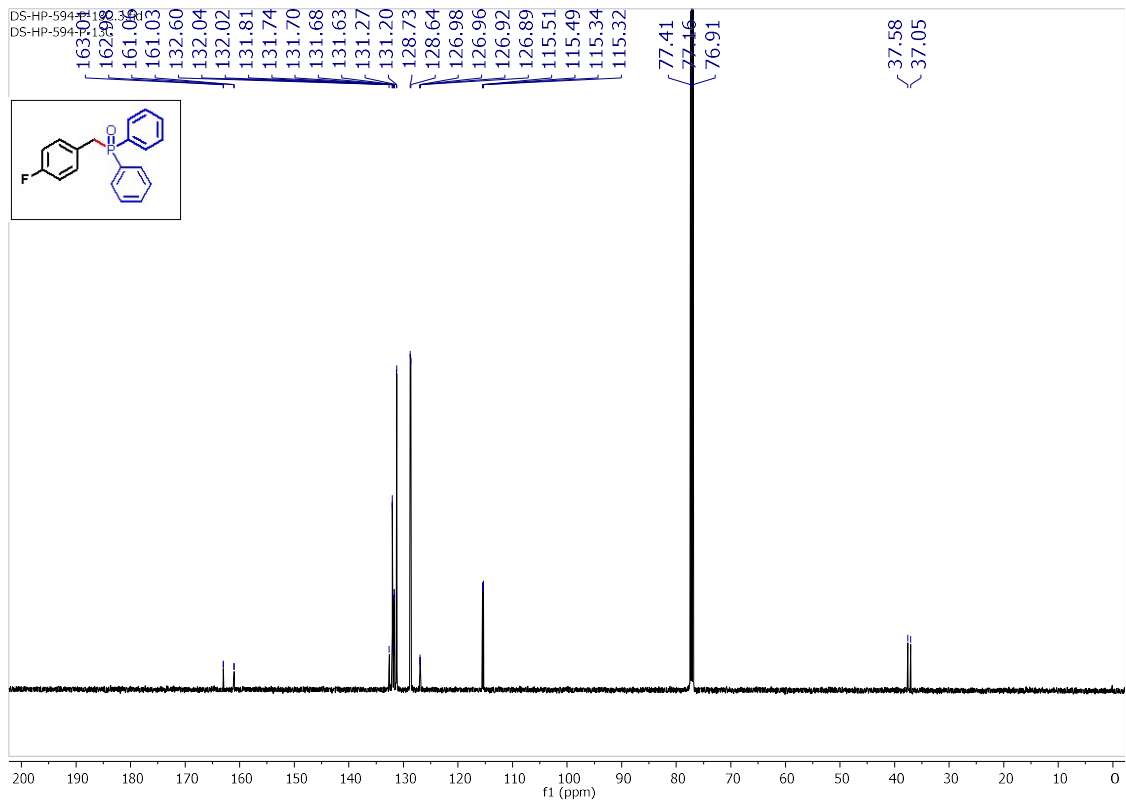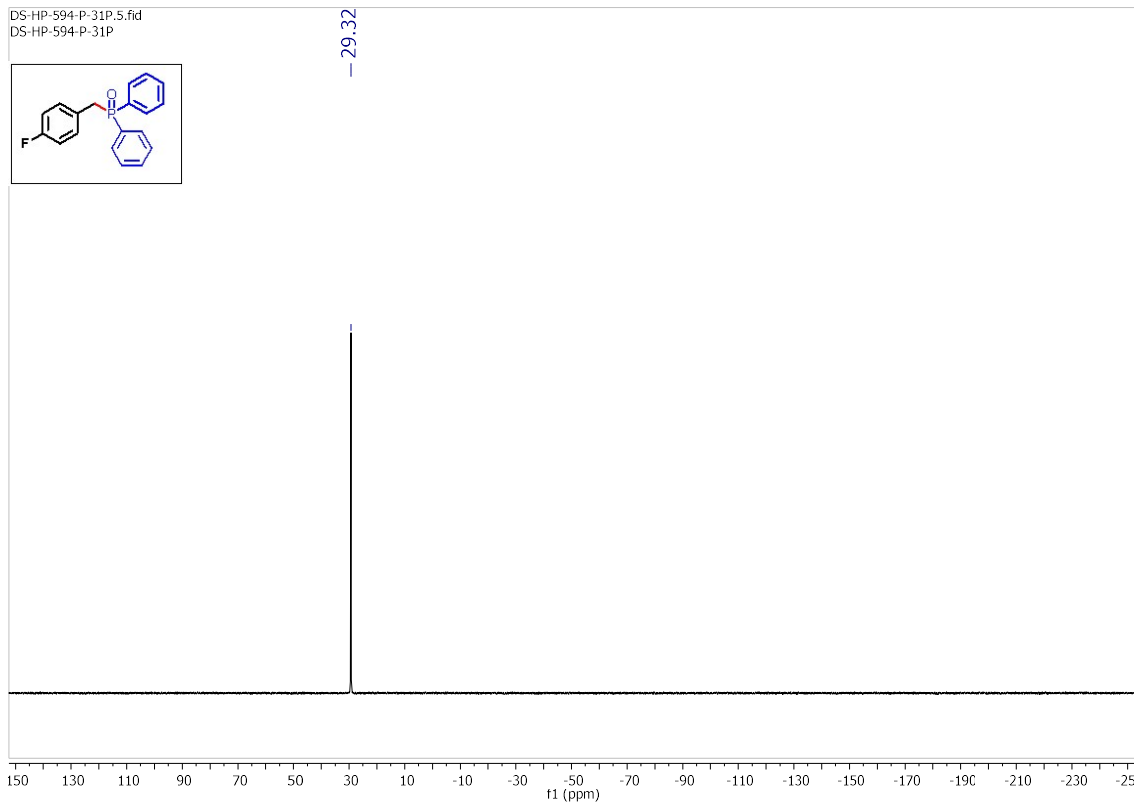

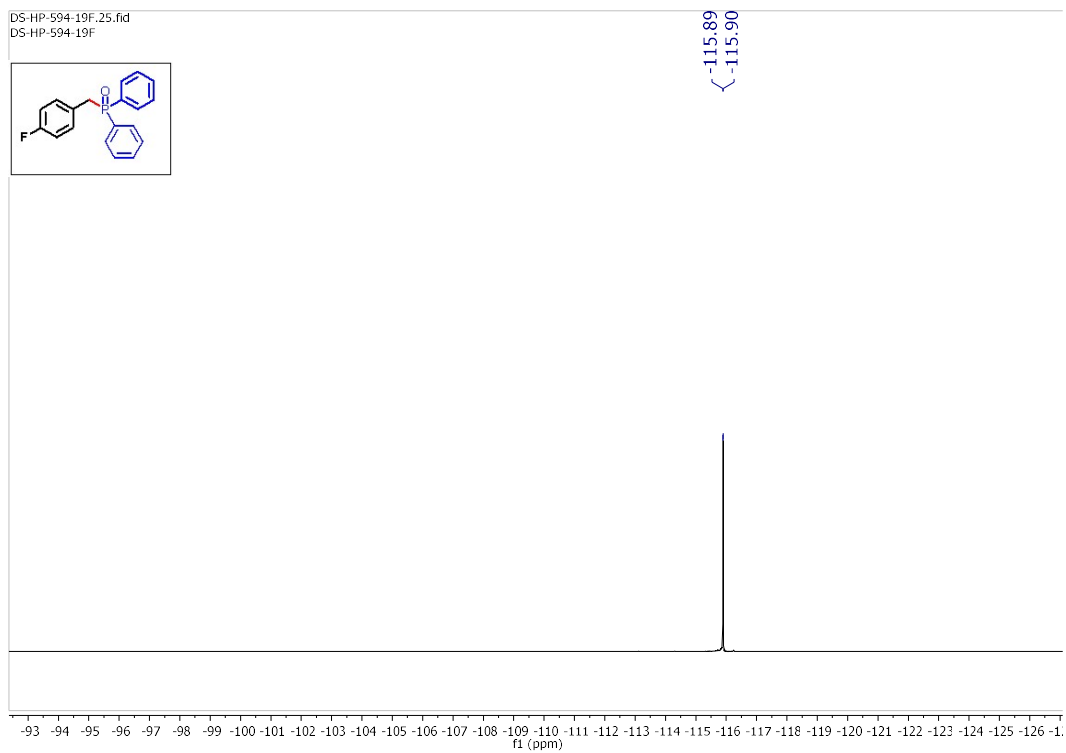

Figure S9.  $^1\text{H}$  NMR (500 MHz),  $^{13}\text{C}\{^1\text{H}\}$  NMR (125 MHz),  $^{31}\text{P}$  and  $^{19}\text{F}\{^1\text{H}\}$  NMR (200 MHz) spectrum of Compound 3h in  $\text{CDCl}_3$

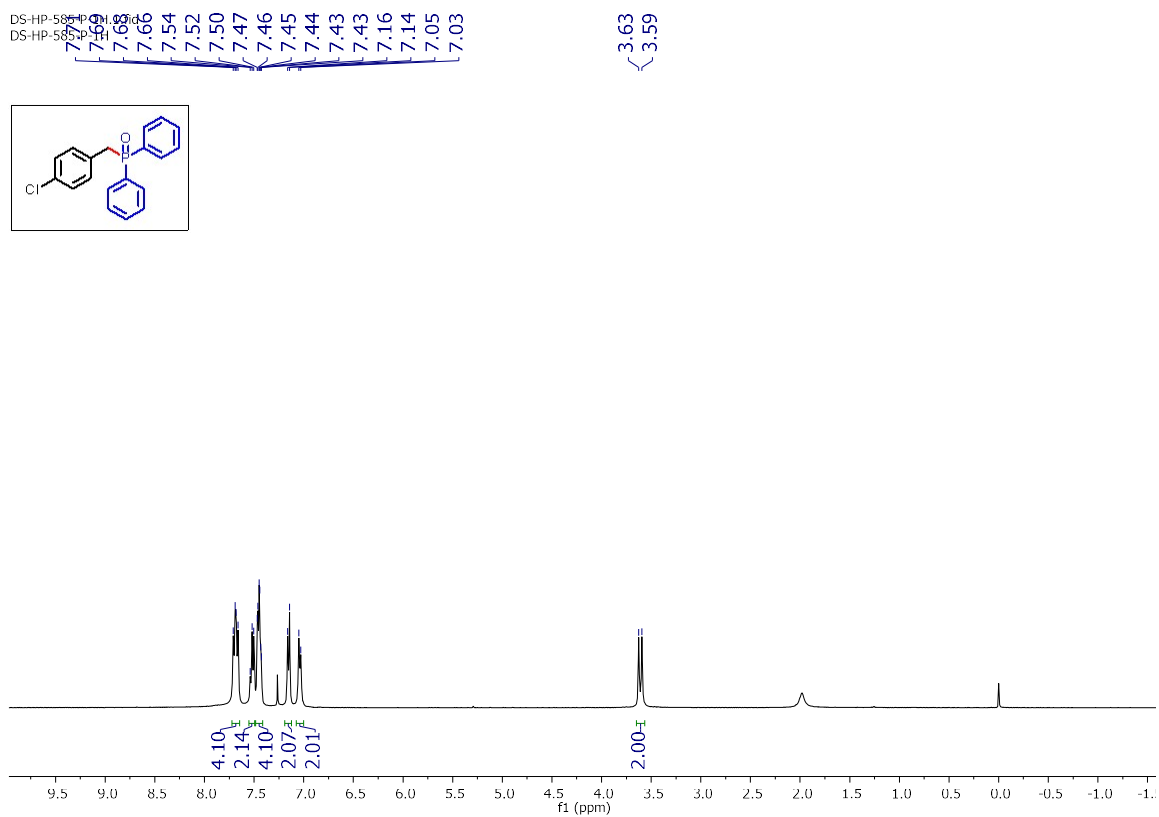

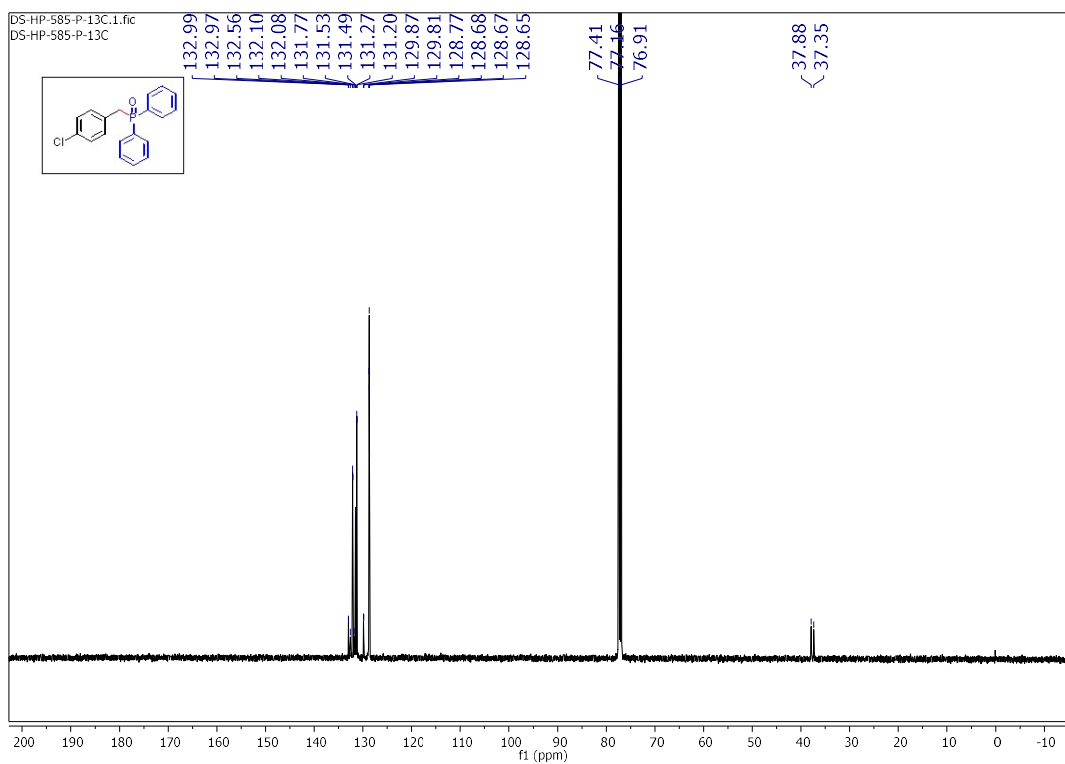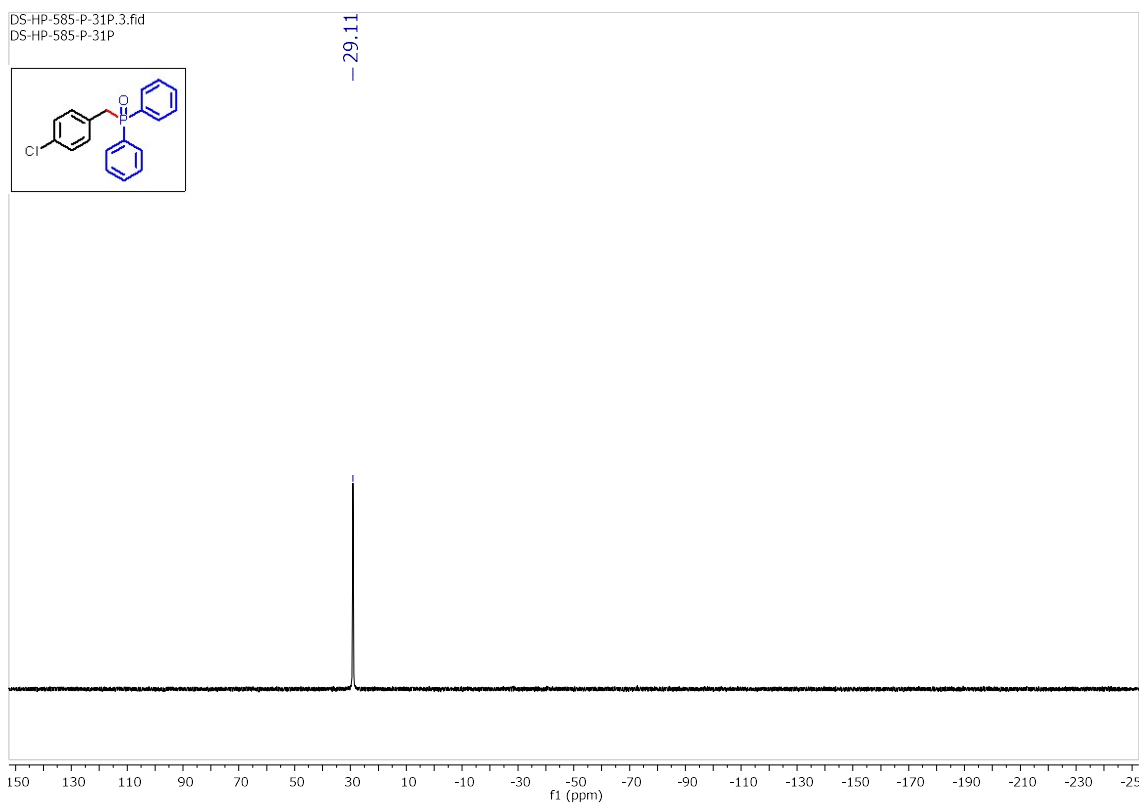

Figure S10.  $^1\text{H}$  NMR (400 MHz),  $^{13}\text{C}\{^1\text{H}\}$  NMR (125 MHz), and  $^{31}\text{P}\{^1\text{H}\}$  NMR (200 MHz) spectrum of Compound 3i in  $\text{CDCl}_3$

DS-HP-810F-13C  
 DS-HP-810F-13C

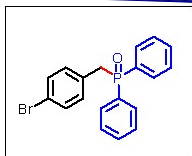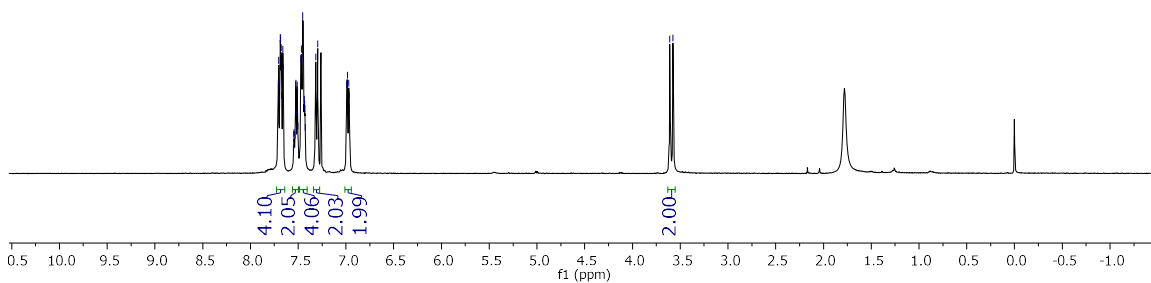

DS-HP-810F-13C.3.fid  
 DS-HP-810F-13C

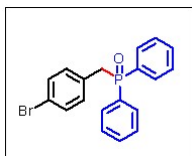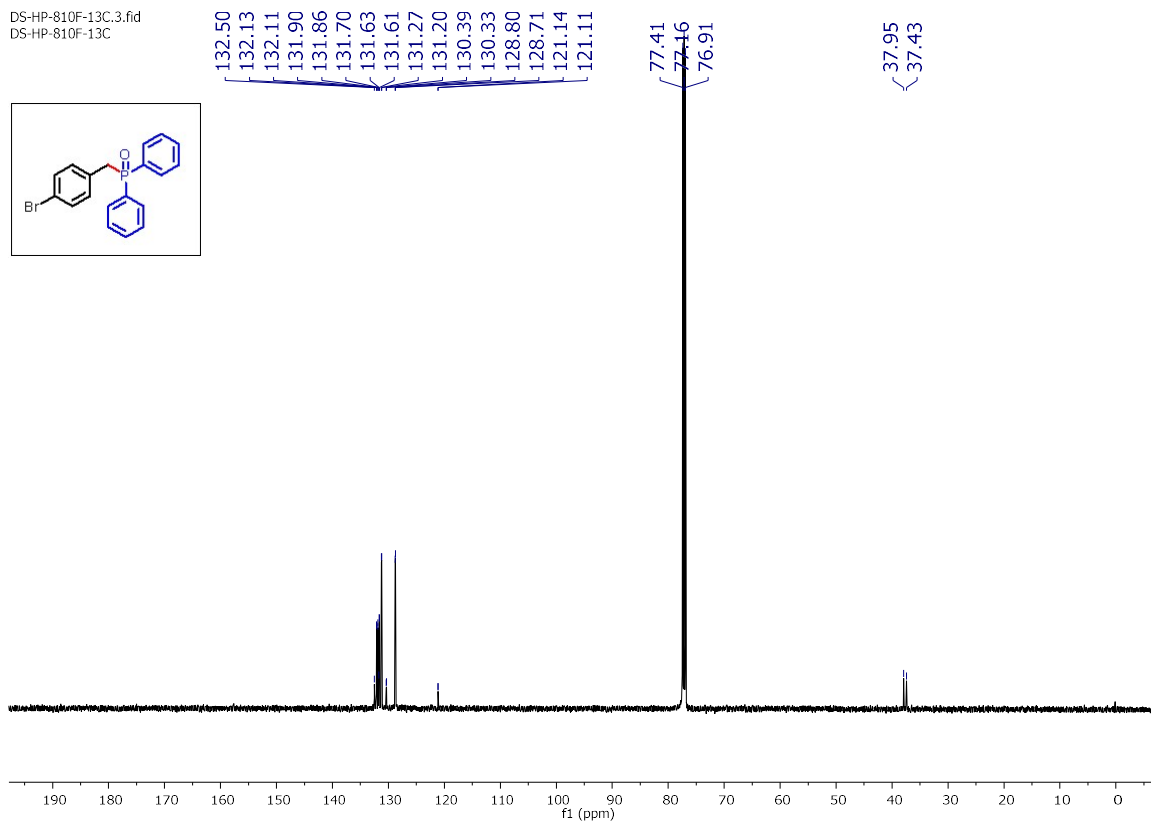

DS-HP-810F-31P.5.fid  
DS-HP-810F-31P

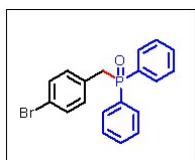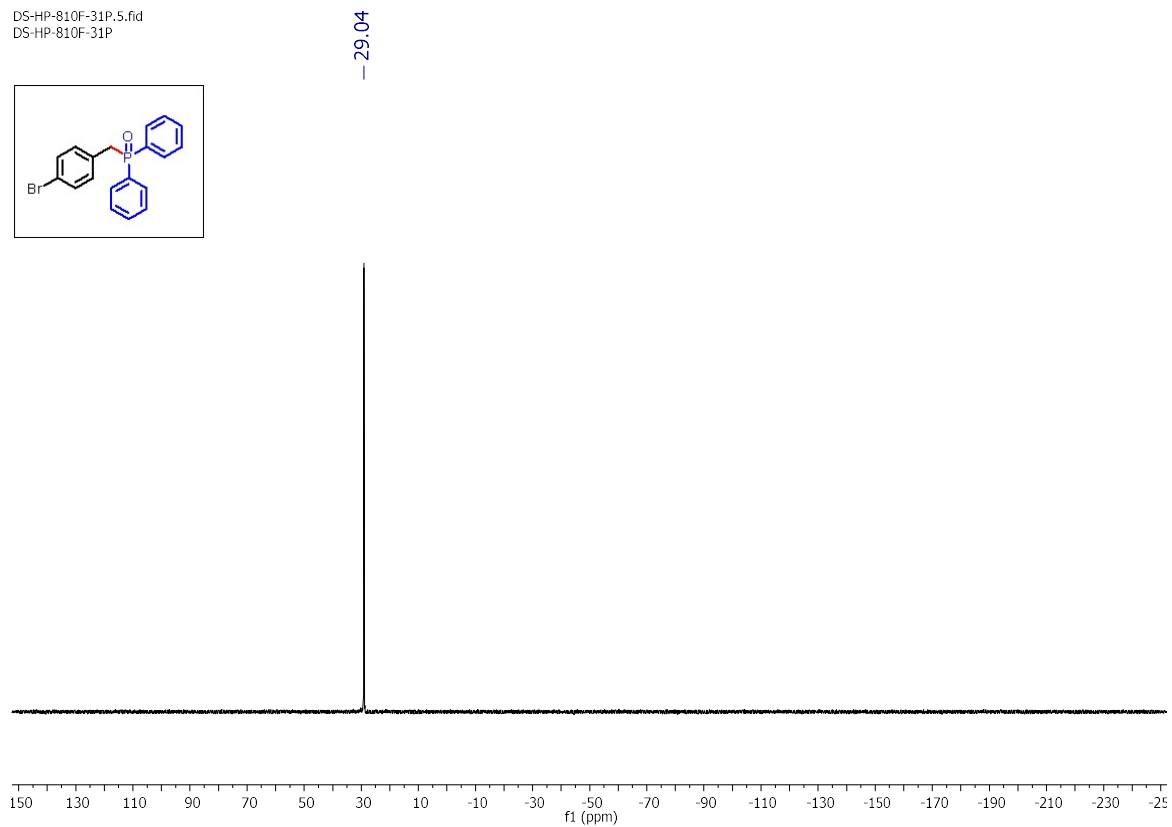

Figure S11.  $^1\text{H}$  NMR (400 MHz),  $^{13}\text{C}\{^1\text{H}\}$  NMR (125 MHz), and  $^{31}\text{P}\{^1\text{H}\}$  NMR (200 MHz) spectrum of Compound 3j in  $\text{CDCl}_3$

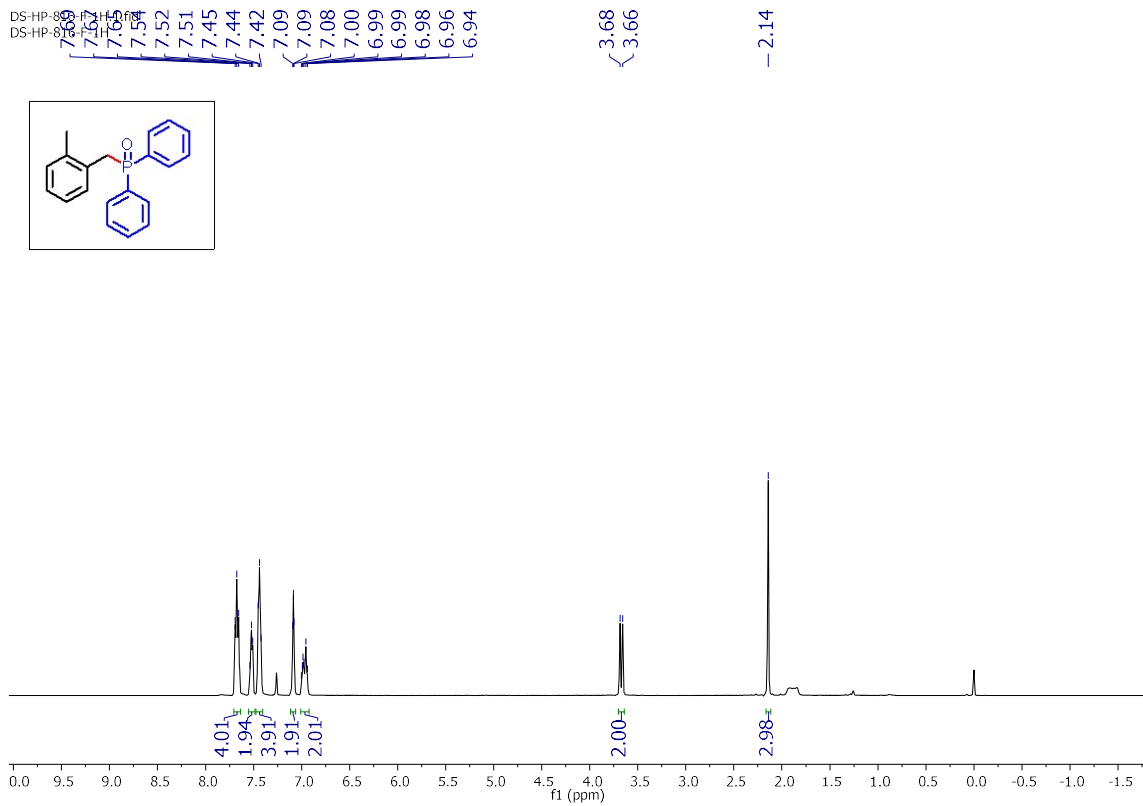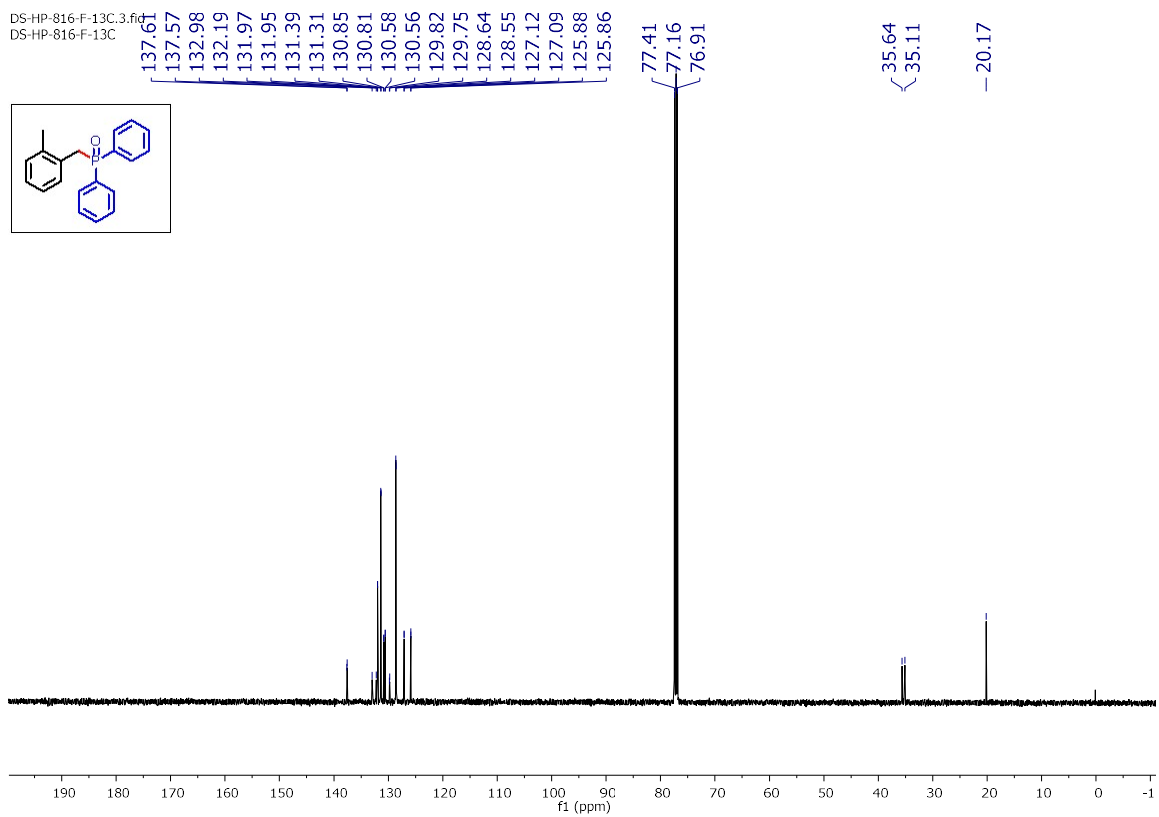

DS-HP-816-F-31P.5.fid  
DS-HP-816-F-31P

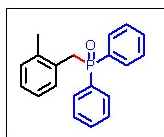

- 29.61

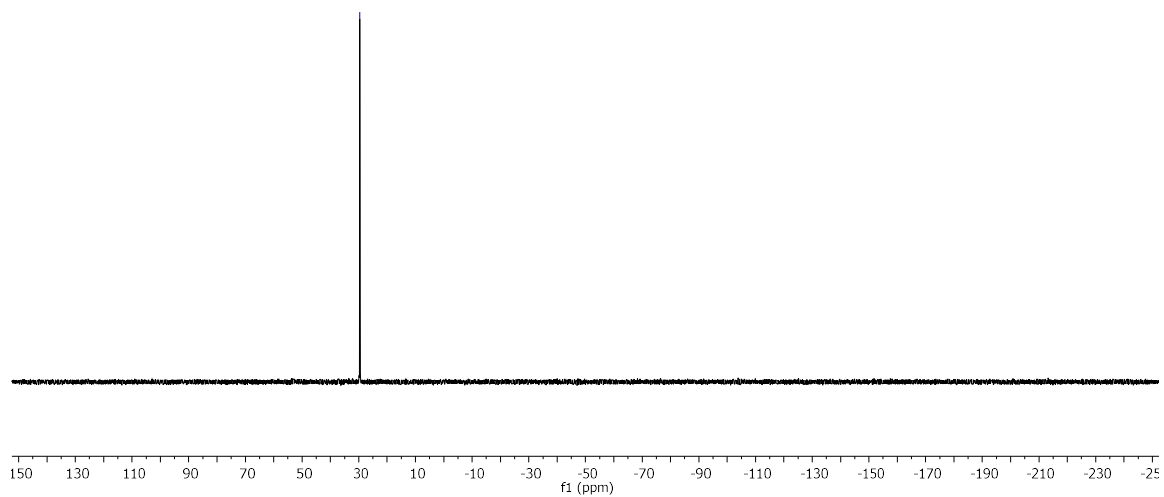

Figure S12. <sup>1</sup>H NMR (500 MHz), <sup>13</sup>C {<sup>1</sup>H} NMR (125 MHz), and <sup>31</sup>P {<sup>1</sup>H} NMR (200 MHz) spectrum of Compound 3k in CDCl<sub>3</sub>

DS-HP-20ME-BENZ  
 DS-HP-20ME-BENZ

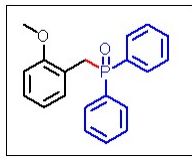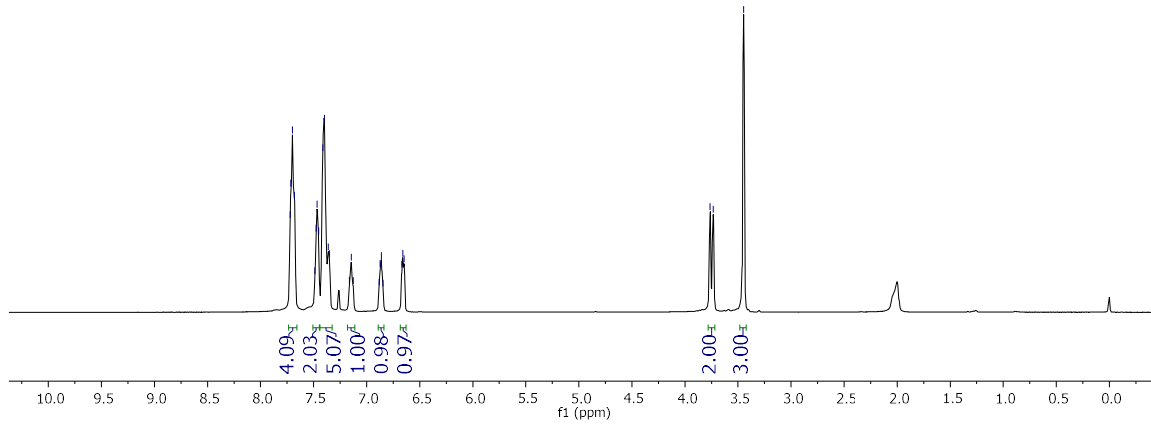

3.76  
 3.73  
 3.45

DS-HP-20ME-BENZ  
 DS-HP-20ME-BENZ

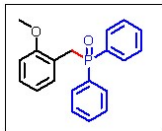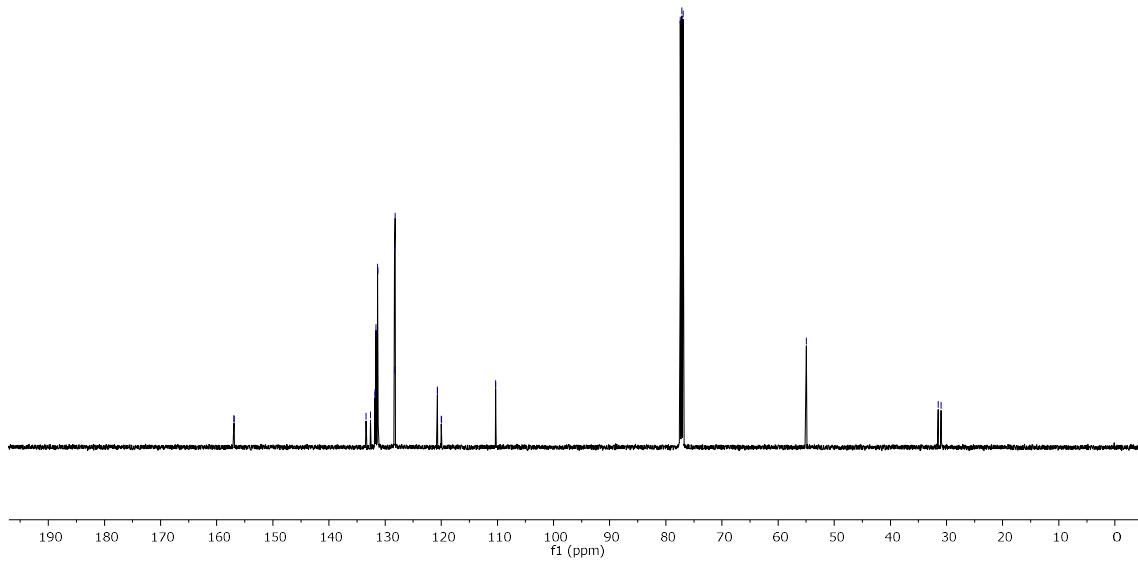

77.41  
 77.16  
 76.91  
 54.97  
 31.51  
 30.97

DS-HP-2OME-BENZ-31P.3.fid  
DS-HP-2OME-BENZ-31P

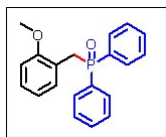

- 30.07

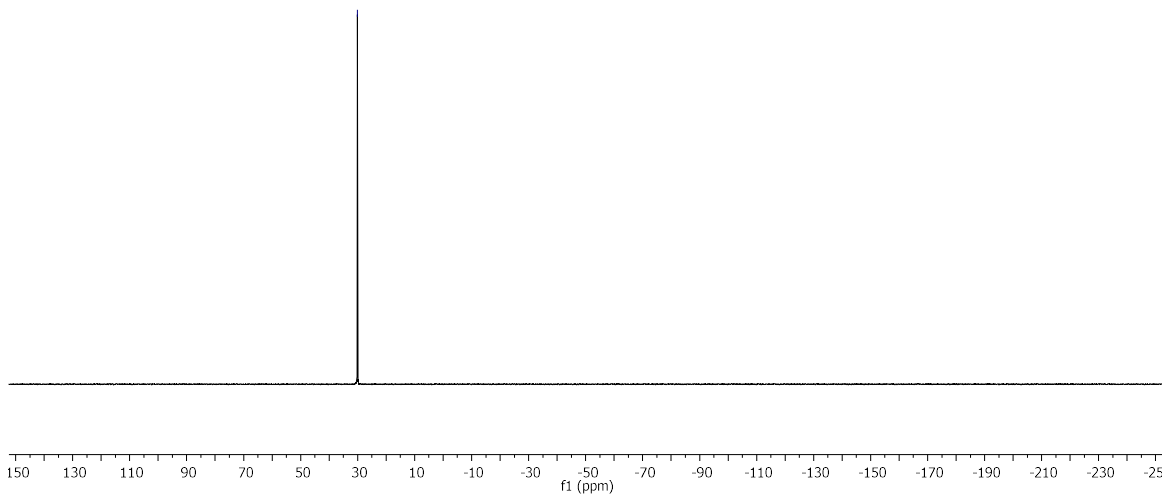

Figure S13.  $^1\text{H}$  NMR (500 MHz),  $^{13}\text{C}\{^1\text{H}\}$  NMR (125 MHz), and  $^{31}\text{P}\{^1\text{H}\}$  NMR (200 MHz) spectrum of Compound 31 in  $\text{CDCl}_3$

DS-HP-2CL-BEN-13C  
 DS-HP-2CL-BEN-13C

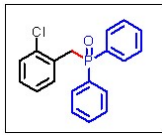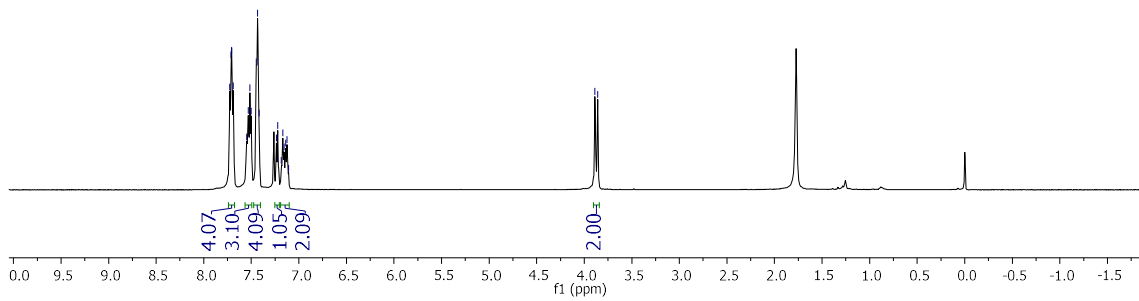

DS-HP-2CL-BEN-13C.3.fid  
 DS-HP-2CL-BEN-13C

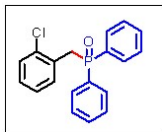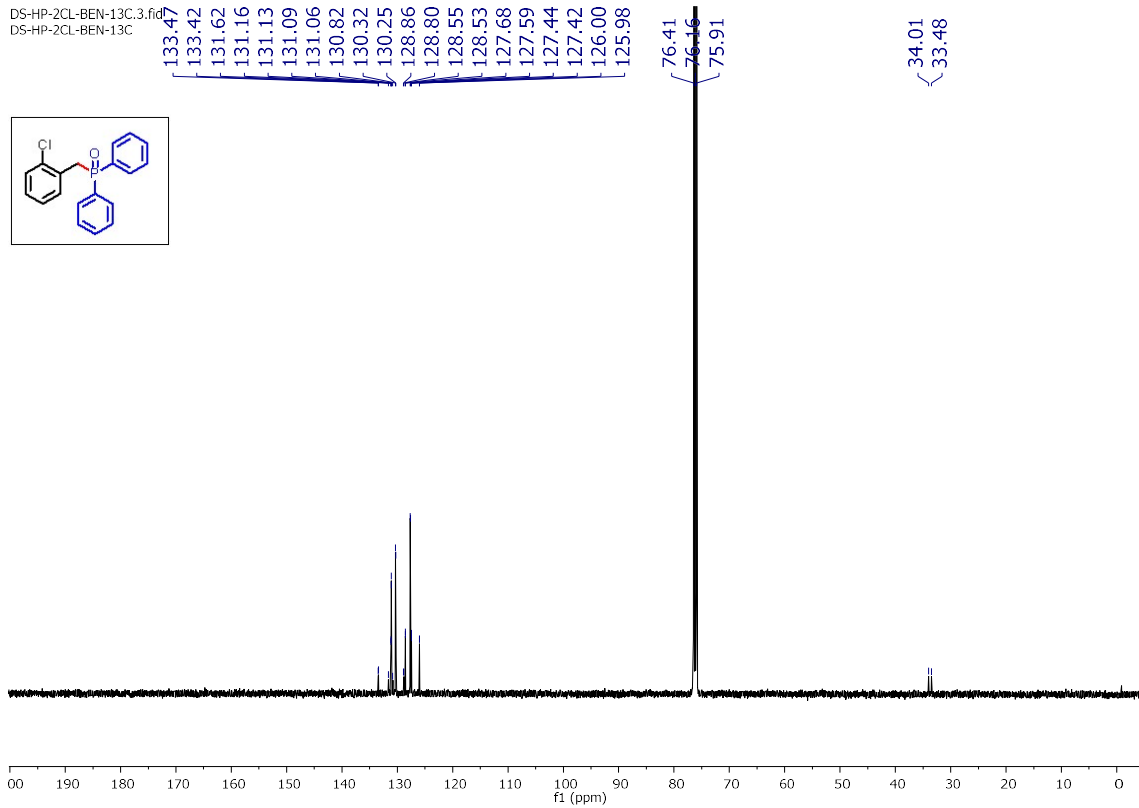

DS-HP-2CL-BEN-31P.5.fid  
DS-HP-2CL-BEN-31P

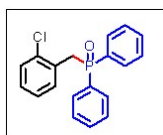

-29.66

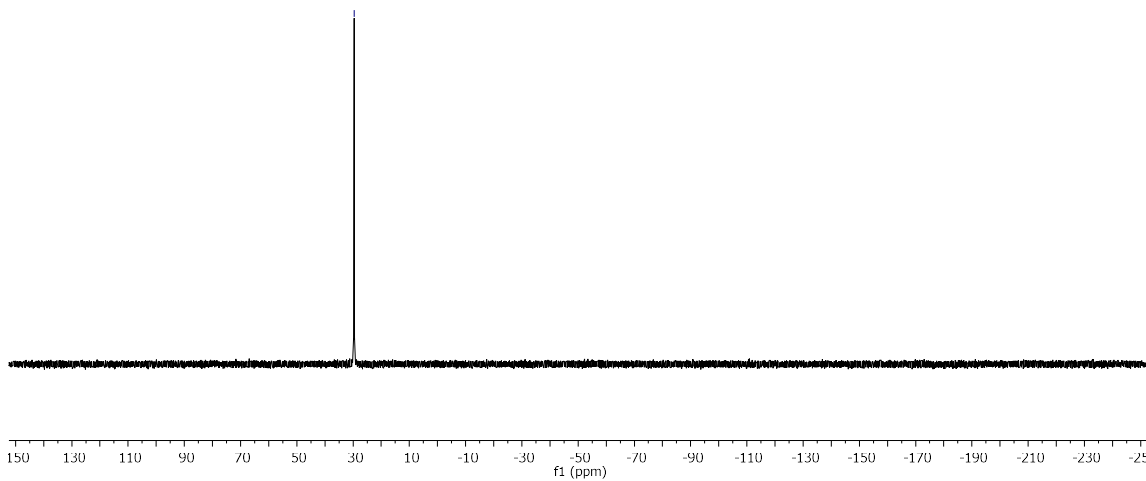

Figure S14.  $^1\text{H}$  NMR (500 MHz),  $^{13}\text{C}$   $\{^1\text{H}\}$  NMR (125 MHz), and  $^{31}\text{P}$   $\{^1\text{H}\}$  NMR (200 MHz) spectrum of Compound 3m in  $\text{CDCl}_3$

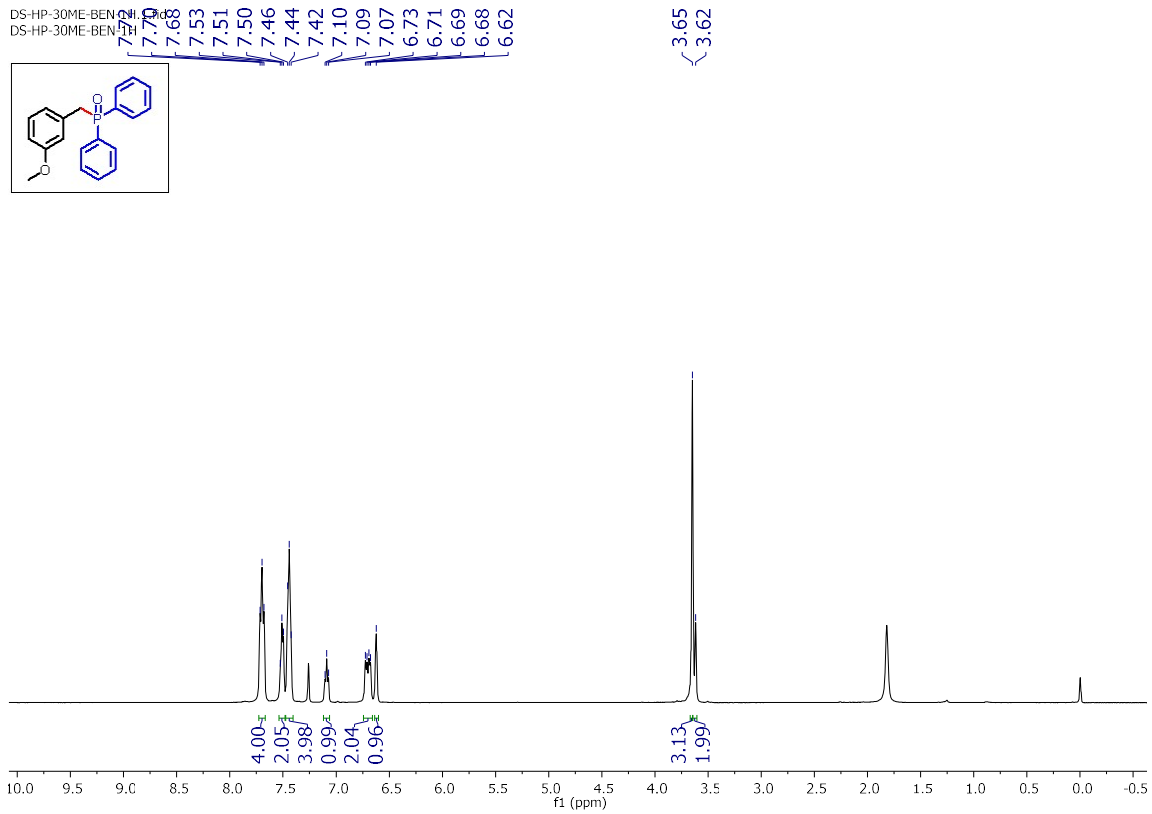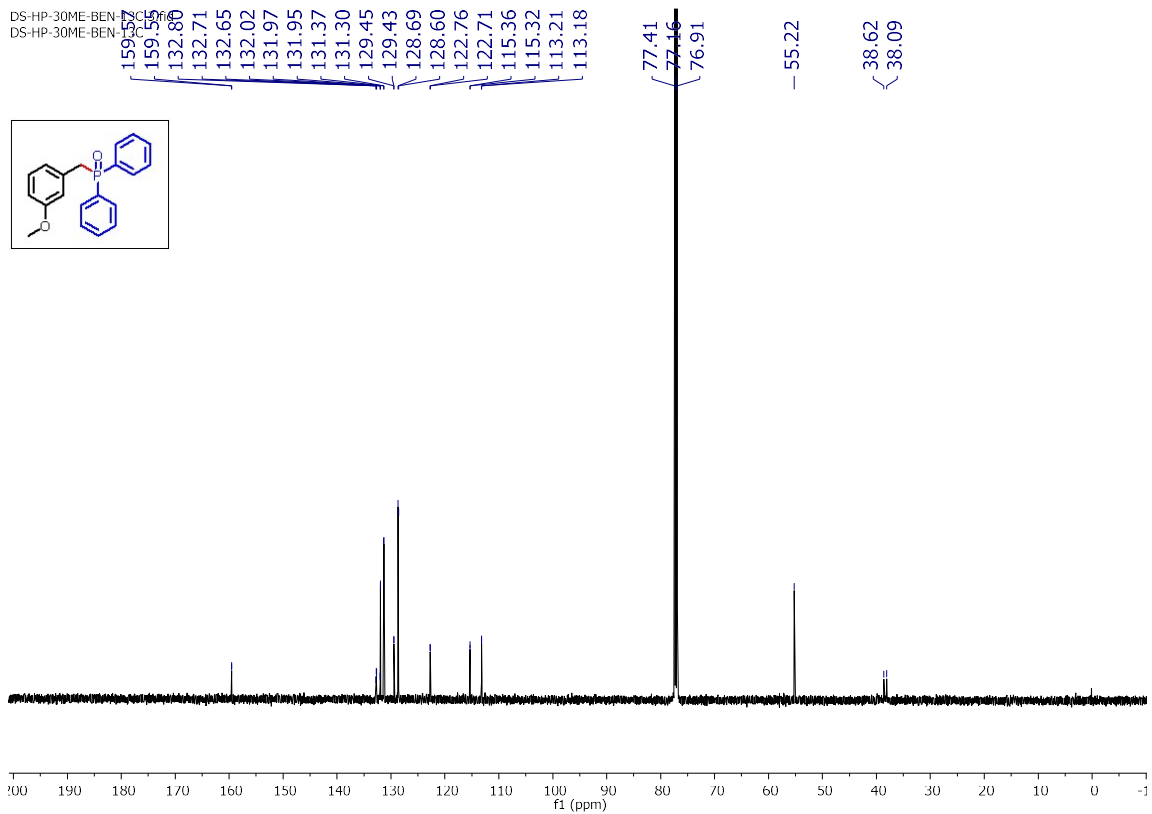

DS-HP-30ME-BEN-31P.5.fid  
DS-HP-30ME-BEN-31P

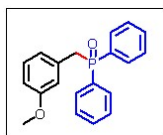

— 29.54

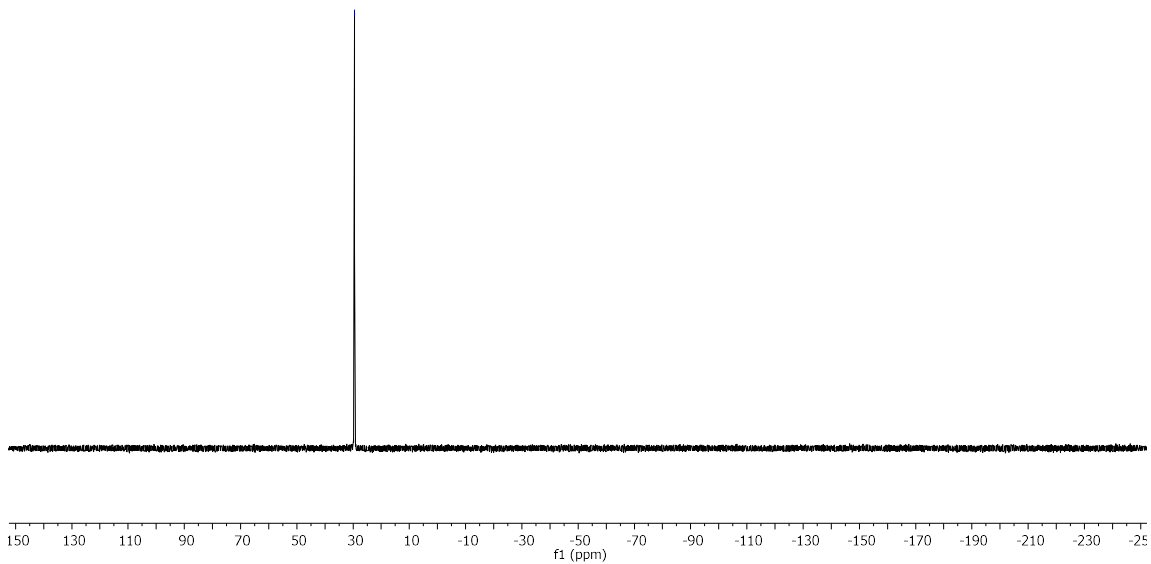

Figure S15.  $^1\text{H}$  NMR (500 MHz),  $^{13}\text{C}\{^1\text{H}\}$  NMR (125 MHz), and  $^{31}\text{P}\{^1\text{H}\}$  NMR (200 MHz) spectrum of Compound 3n in  $\text{CDCl}_3$

DS-RD-18F-11C  
 DS-RD-18F-11C

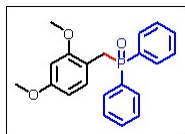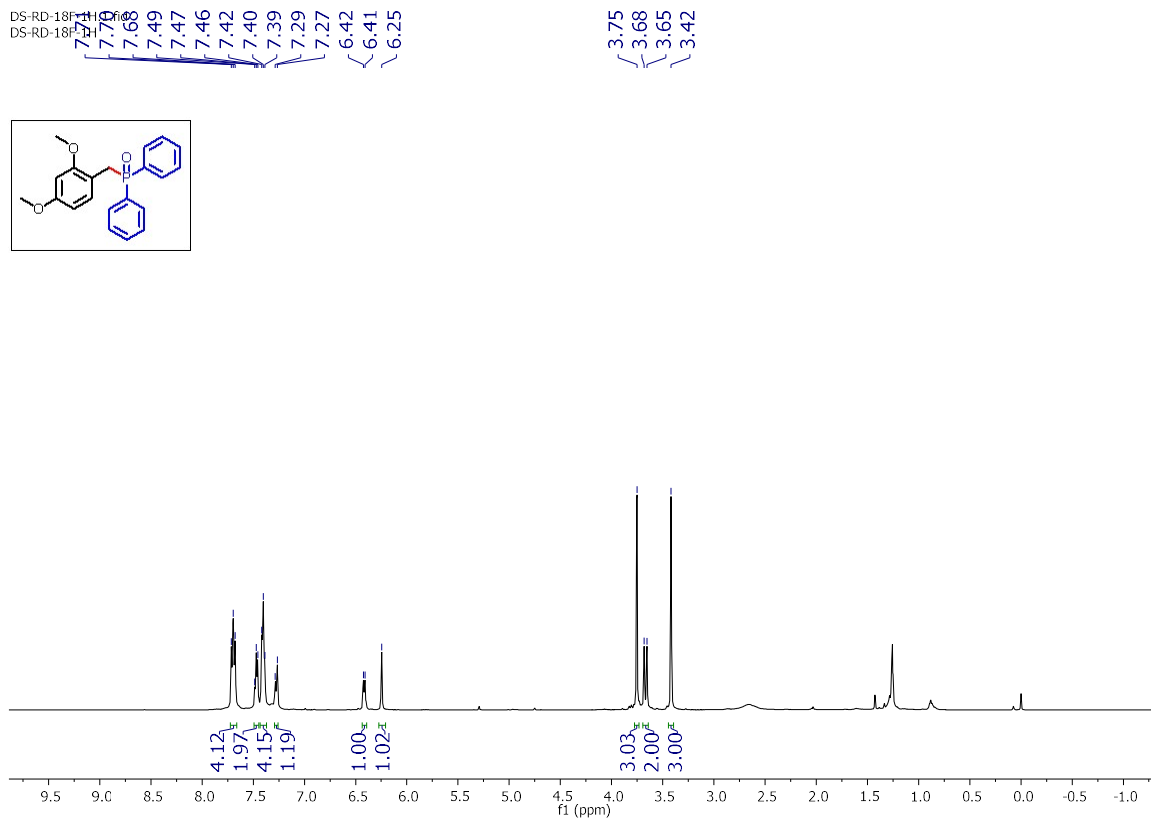

DS-RD-18F-13C.3.f02  
 DS-RD-18F-13C

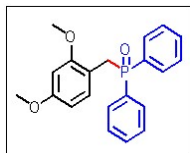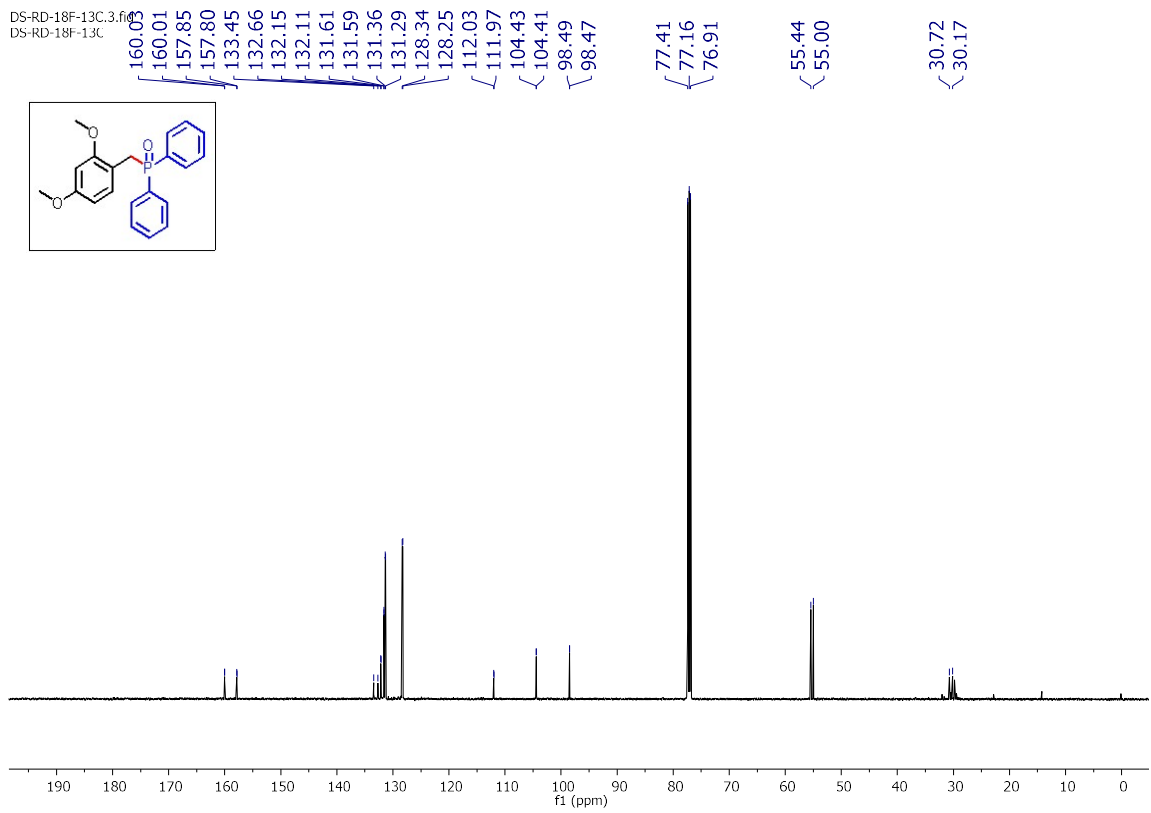

DS-RD-18F-31P.5.fid  
DS-RD-18F-31P

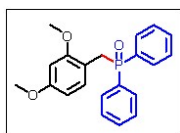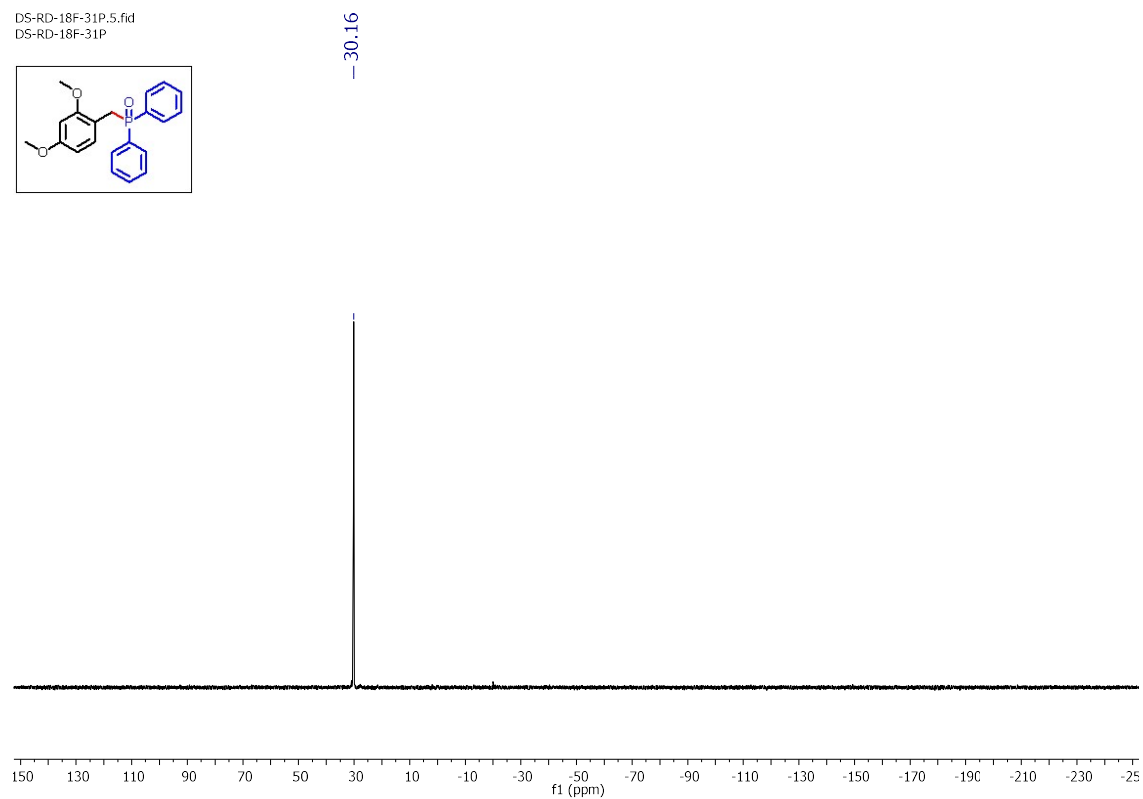

Figure S16. <sup>1</sup>H NMR (500 MHz), <sup>13</sup>C {<sup>1</sup>H} NMR (125 MHz), and <sup>31</sup>P {<sup>1</sup>H} NMR (200 MHz) spectrum of Compound 3o in CDCl<sub>3</sub>

DS-RD-143-1H.1.fid  
DS-RD-143-1H

7.73  
7.72  
7.70  
7.69  
7.53  
7.52  
7.50  
7.47  
7.46  
7.45  
7.44  
6.25  
6.24  
6.24

3.78  
3.64  
3.60  
3.57

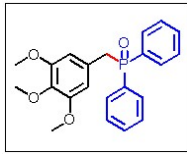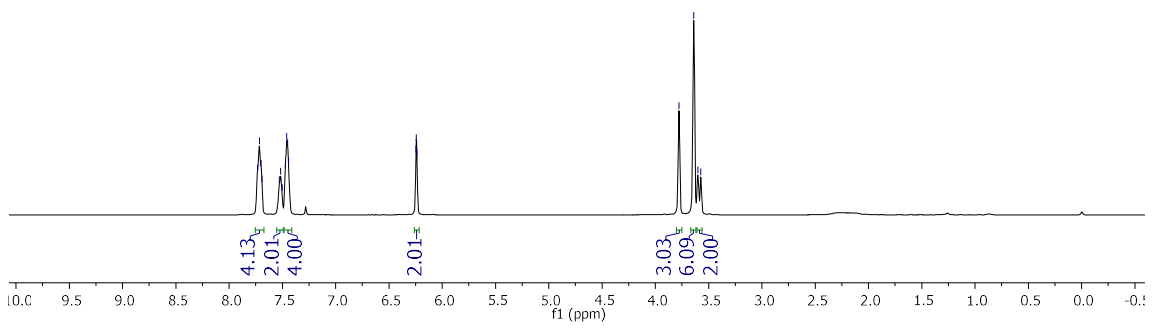

DS-RD-143-13C.3.fid  
DS-RD-143-13C

152.99  
152.97  
136.94  
136.92  
132.65  
131.96  
131.94  
131.86  
131.36  
131.29  
128.65  
128.56  
126.63  
126.57  
107.32  
107.28

77.41  
77.16  
76.91

60.89  
55.97

38.73  
38.20

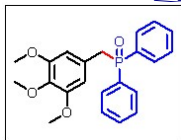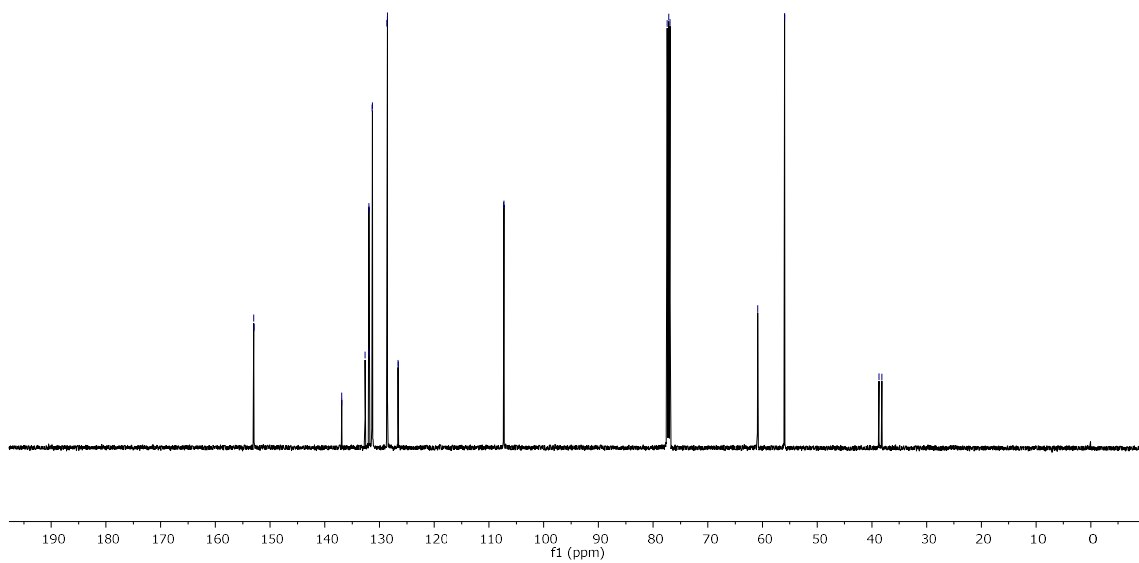

DS-RD-143-31P.5.fid  
DS-RD-143-31P

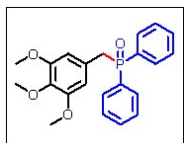

-29.52

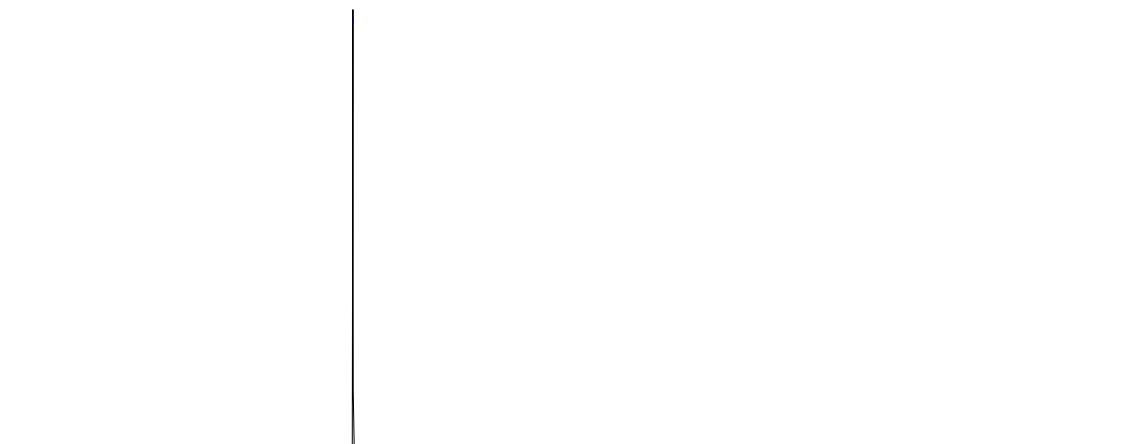

150 130 110 90 70 50 30 10 -10 -30 -50 -70 -90 -110 -130 -150 -170 -190 -210 -230 -25  
f1 (ppm)

Figure S17. <sup>1</sup>H NMR (500 MHz), <sup>13</sup>C {<sup>1</sup>H} NMR (125 MHz), and <sup>31</sup>P {<sup>1</sup>H} NMR (200 MHz) spectrum of Compound 3p in CDCl<sub>3</sub>

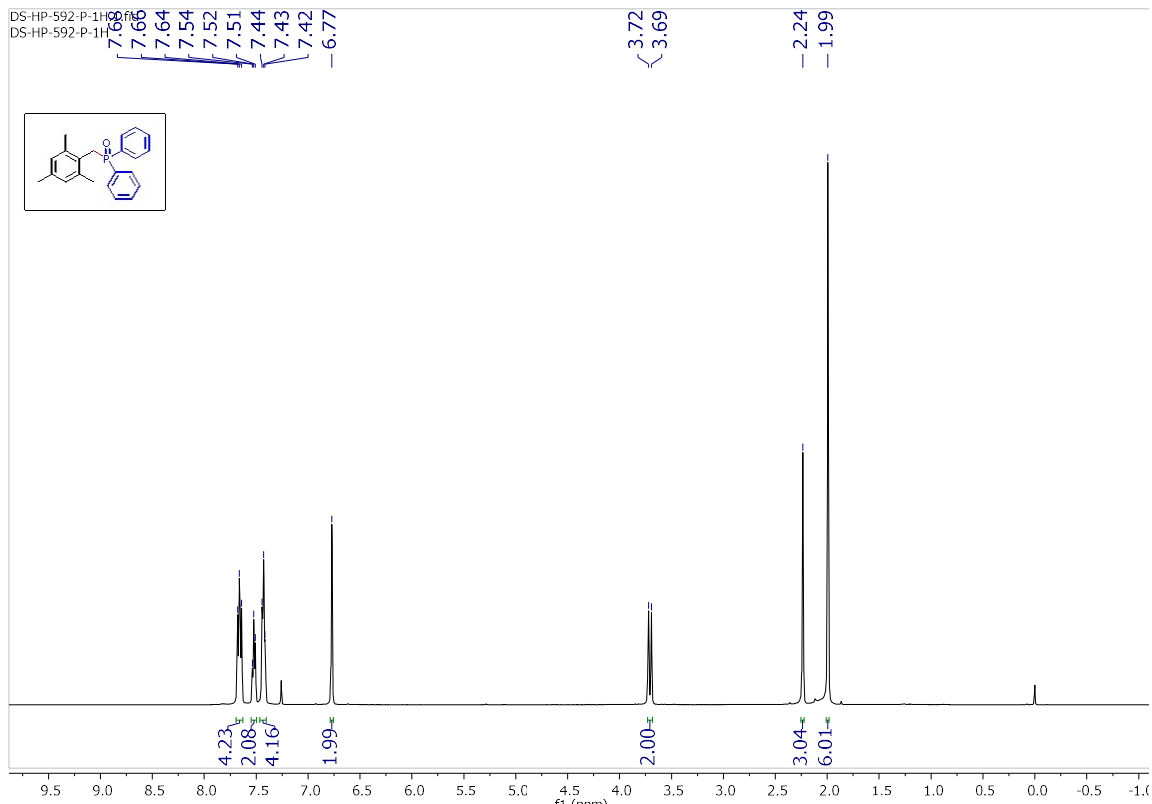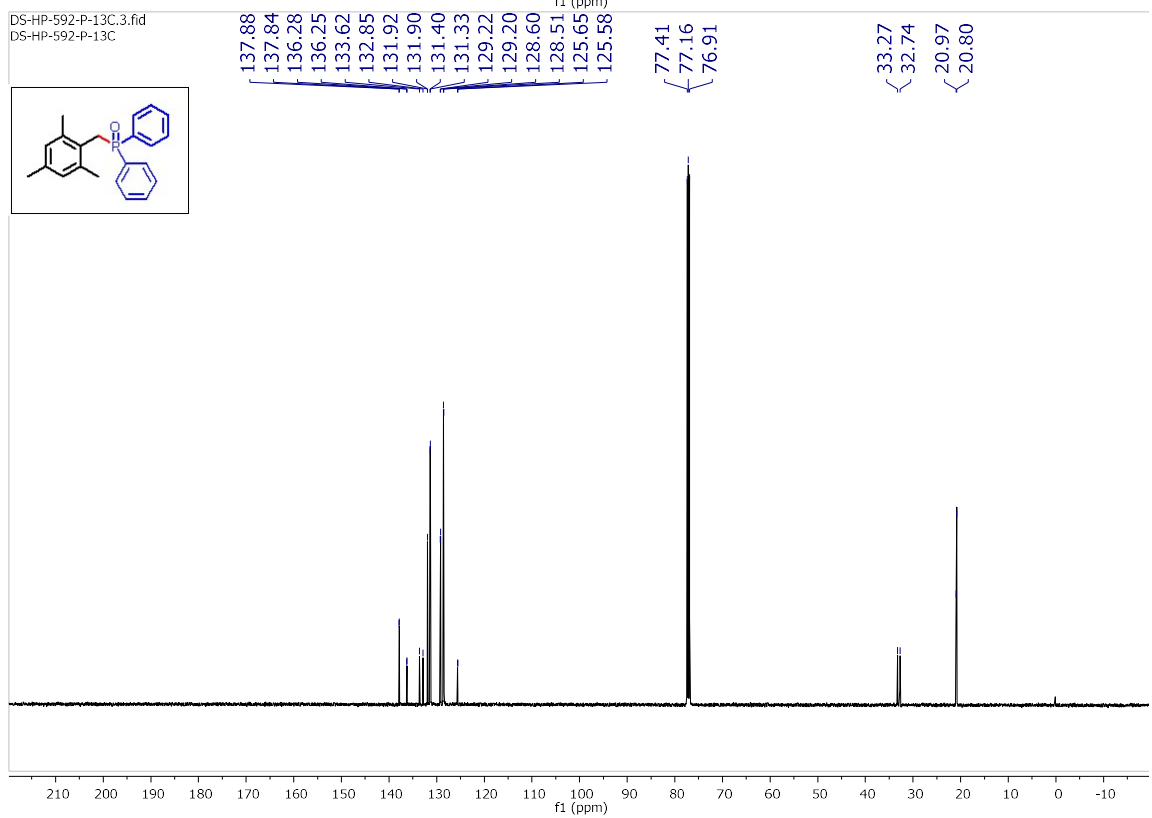

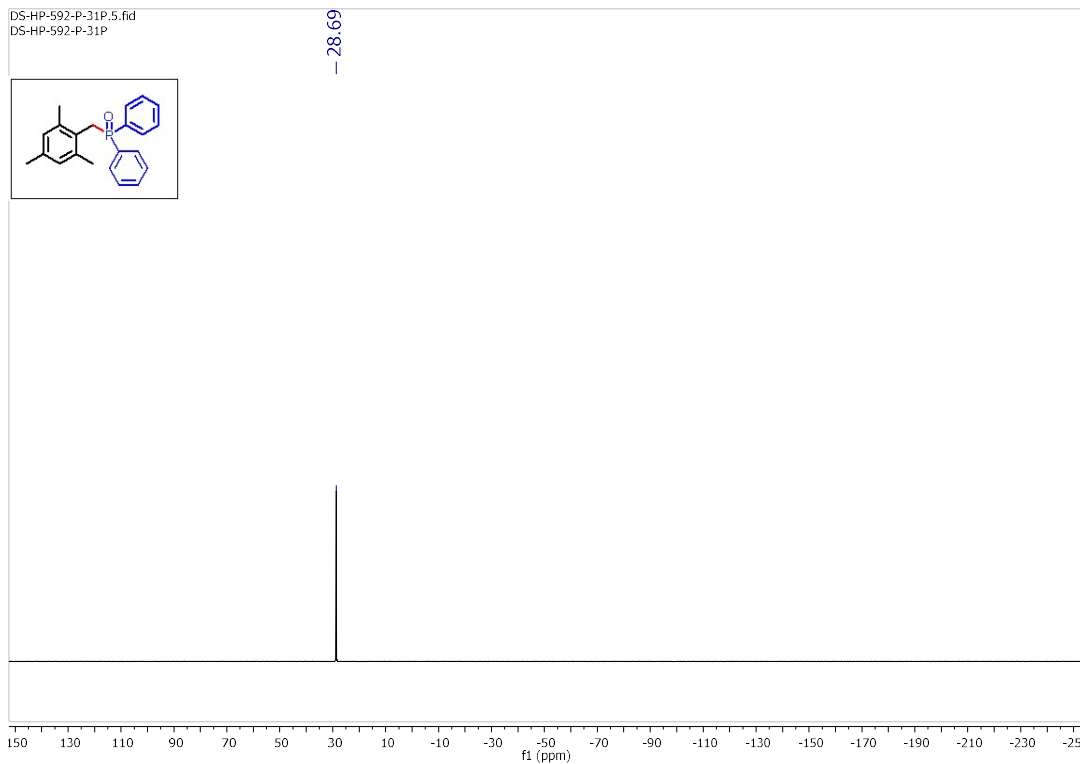

Figure S18.  $^1\text{H}$  NMR (500 MHz),  $^{13}\text{C}\{^1\text{H}\}$  NMR (125 MHz), and  $^{31}\text{P}\{^1\text{H}\}$  NMR (200 MHz) spectrum of Compound 3q in  $\text{CDCl}_3$

DS HP-709A-13C  
 DS HP-709A-13C

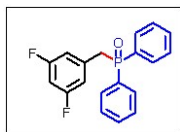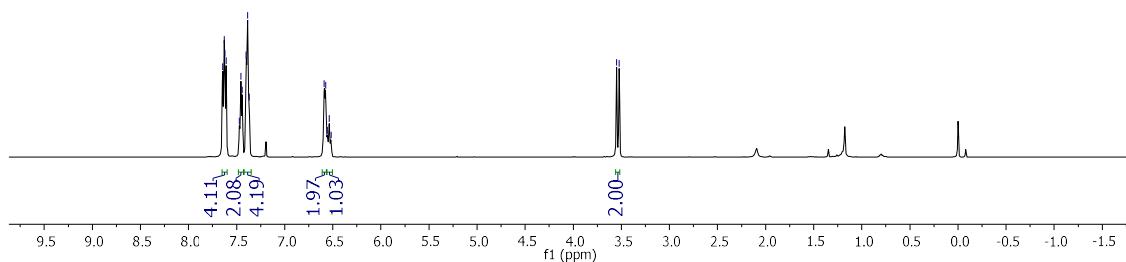

3.55  
 3.52

DS HP-709A-13C  
 DS HP-709A-13C

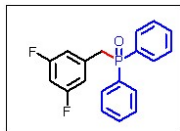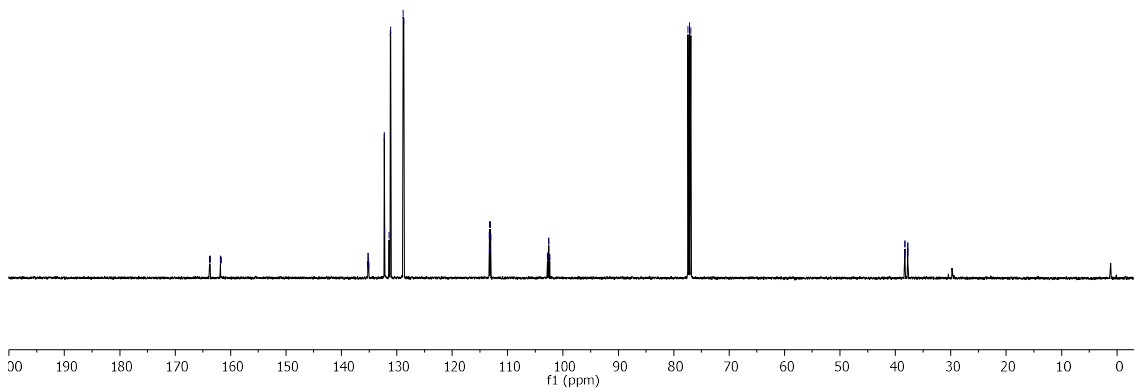

DS-HP-709A-31P.6.fid  
DS-HP-709A-31P

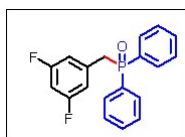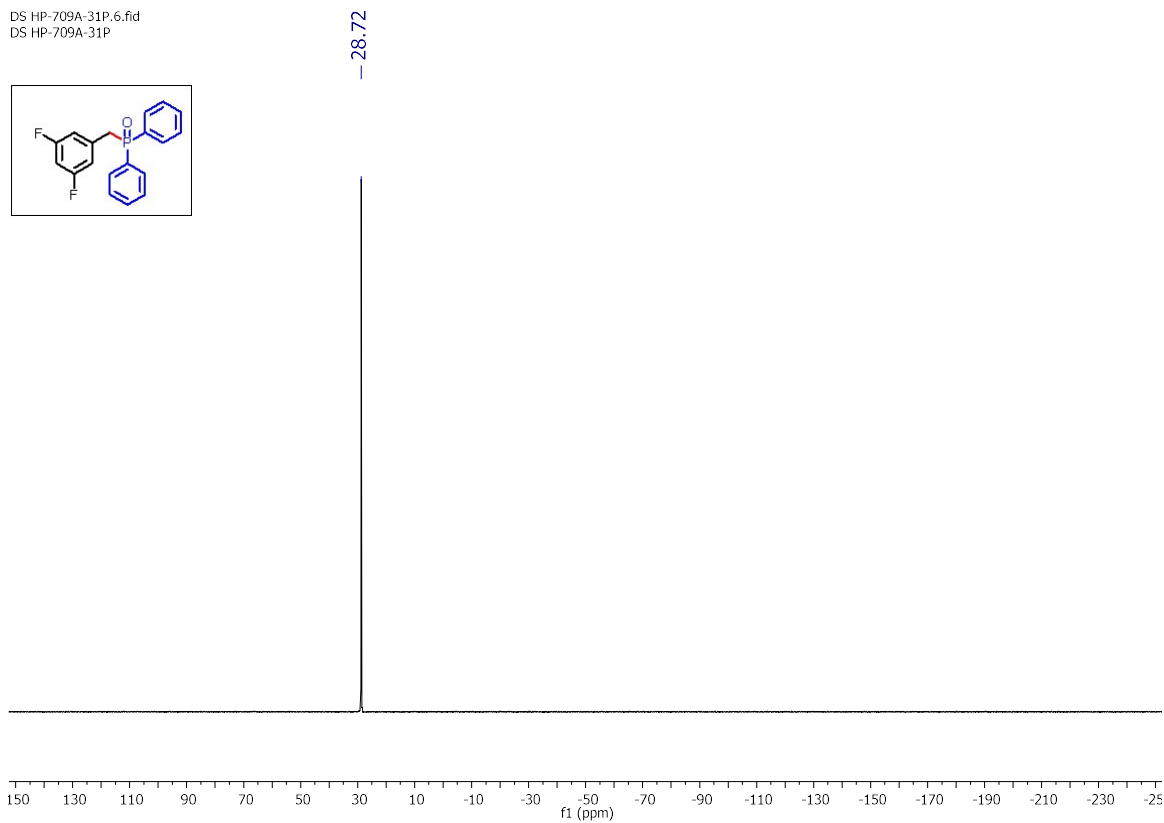

DS-HP-709A-19F.5.fid  
DS-HP-709A-19F

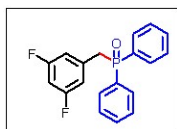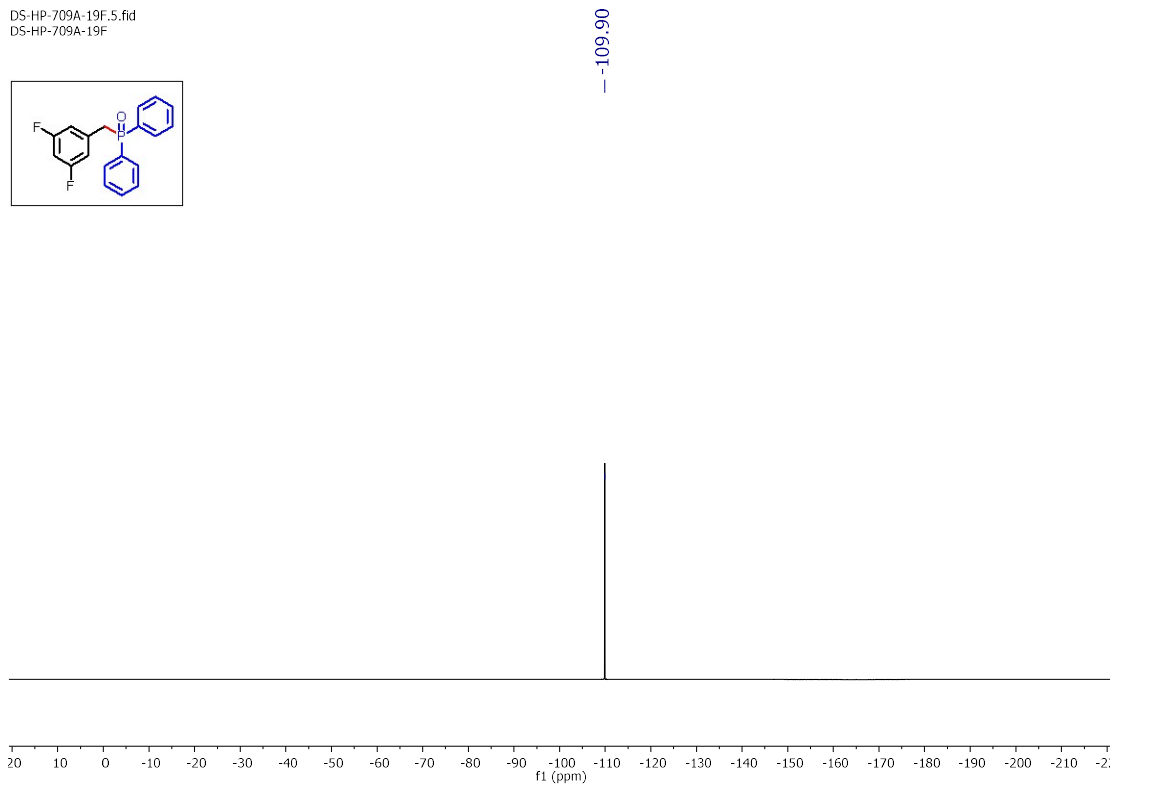

Figure S19.  $^1\text{H}$  NMR (500 MHz),  $^{13}\text{C}$   $\{^1\text{H}\}$  NMR (125 MHz), and  $^{31}\text{P}$   $\{^1\text{H}\}$  NMR (200 MHz) spectrum of Compound 3r in  $\text{CDCl}_3$

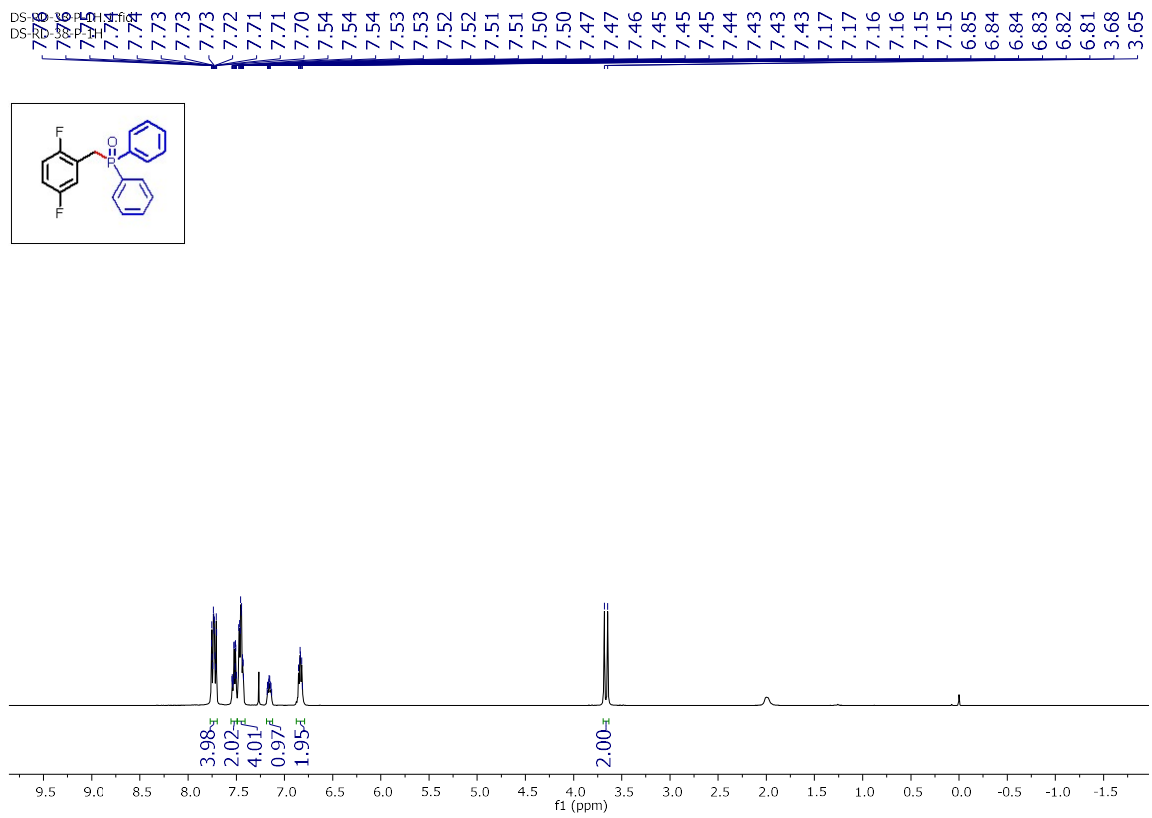

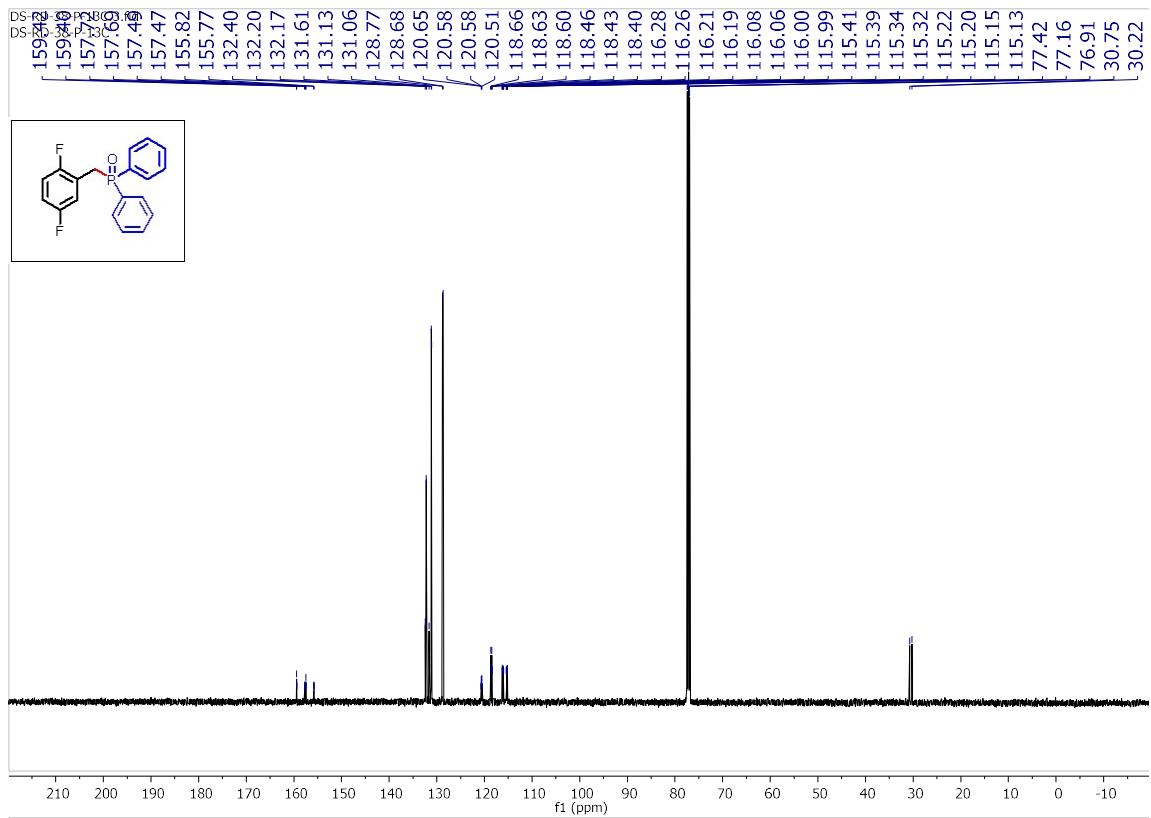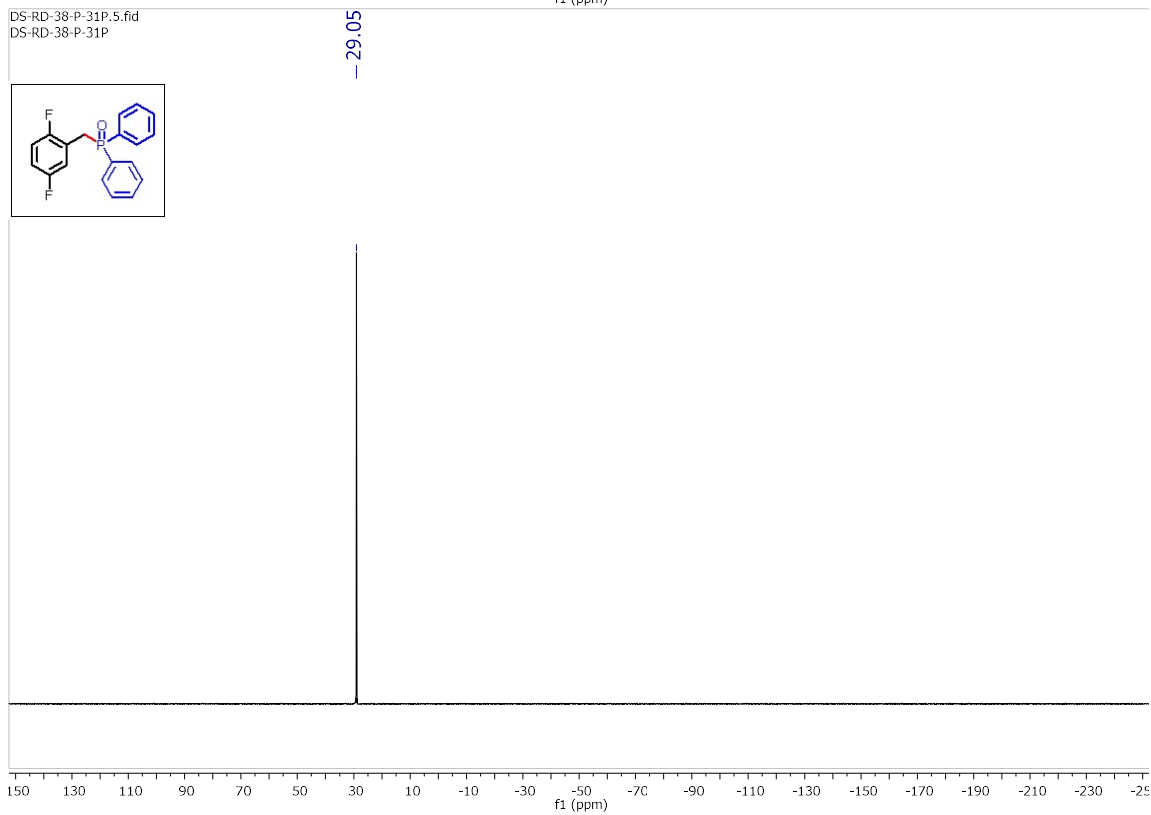

DS-HP-38P-19F.7.fid  
DS-HP-38P-19F

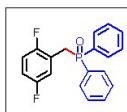

-118.34  
-118.34  
-118.37  
-118.38  
-123.06  
-123.07  
-123.10  
-123.11

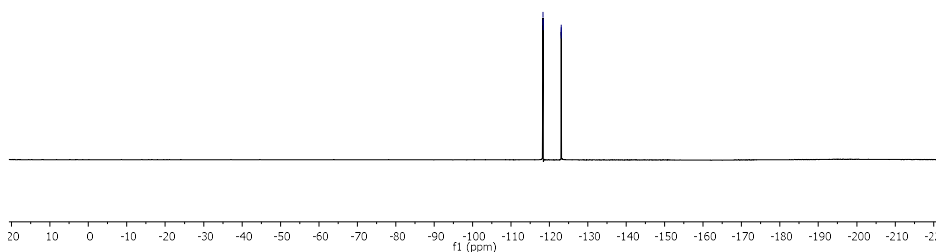

Figure S20.  $^1\text{H}$  NMR (500 MHz),  $^{13}\text{C}\{^1\text{H}\}$  NMR (125 MHz), and  $^{31}\text{P}\{^1\text{H}\}$  NMR (200 MHz) spectrum of Compound 3s in  $\text{CDCl}_3$

DS-RD-41-B-1H.1.fid  
DS-RD-41-B-1H

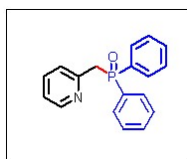

8.39  
8.38  
7.77  
7.76  
7.75  
7.73  
7.57  
7.55  
7.53  
7.50  
7.49  
7.47  
7.44  
7.44  
7.43  
7.42  
7.41  
7.08  
7.07  
7.06  
3.95  
3.92

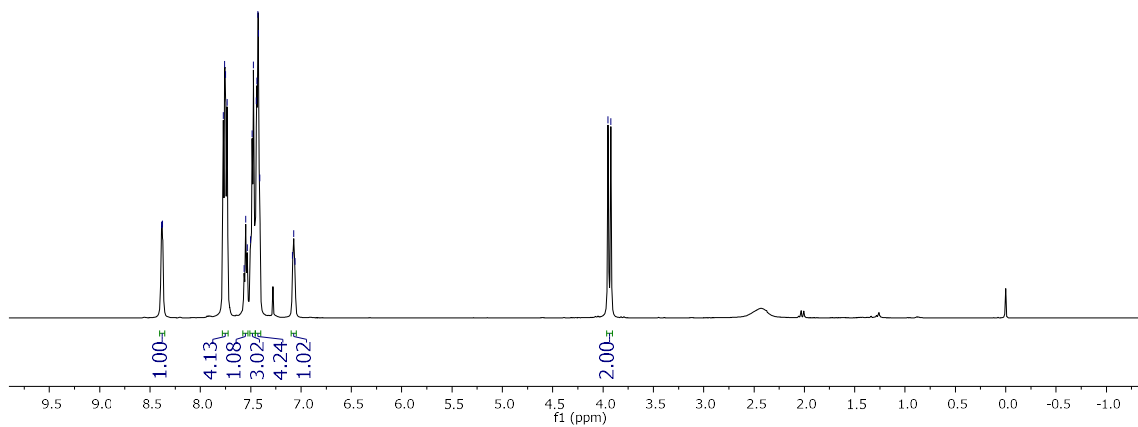

DS-RD-41-B-13C.3.fid  
DS-RD-41-B-13C

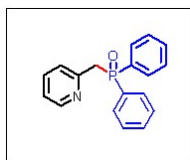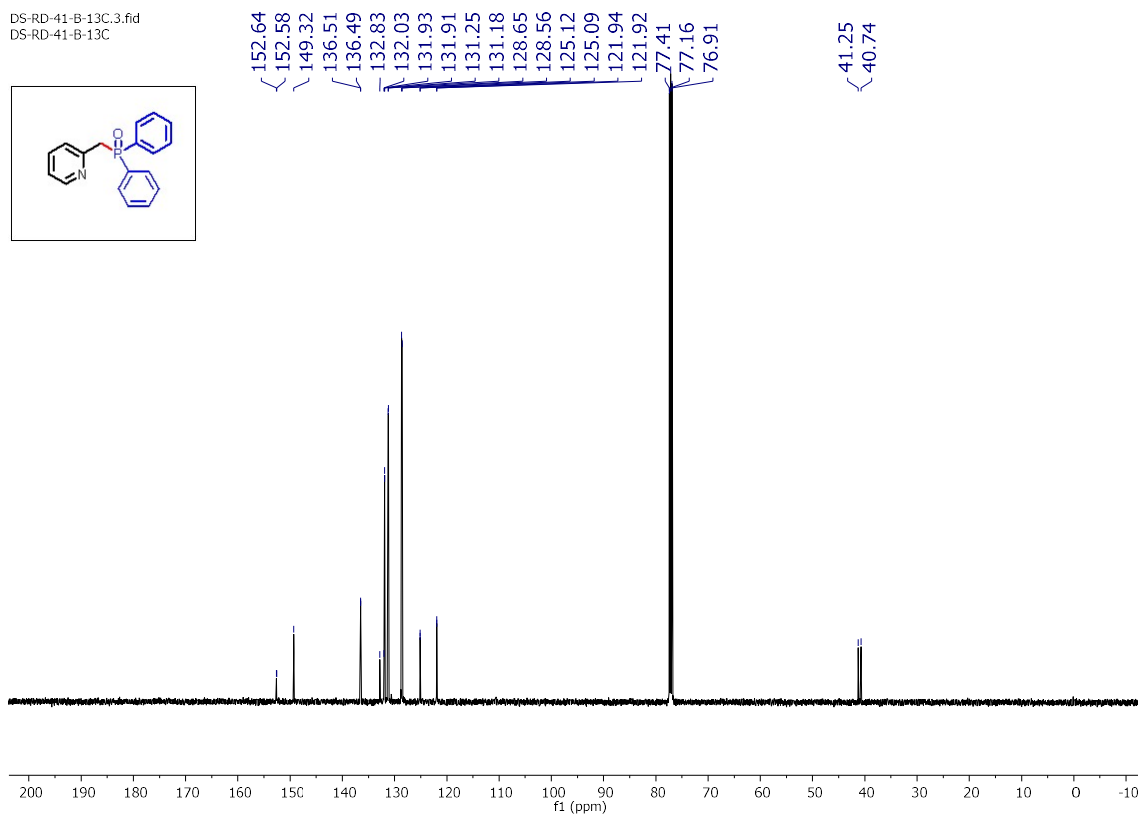

DS-RD-41-B-31P.5.fid  
DS-RD-41-B-31P

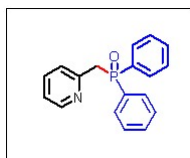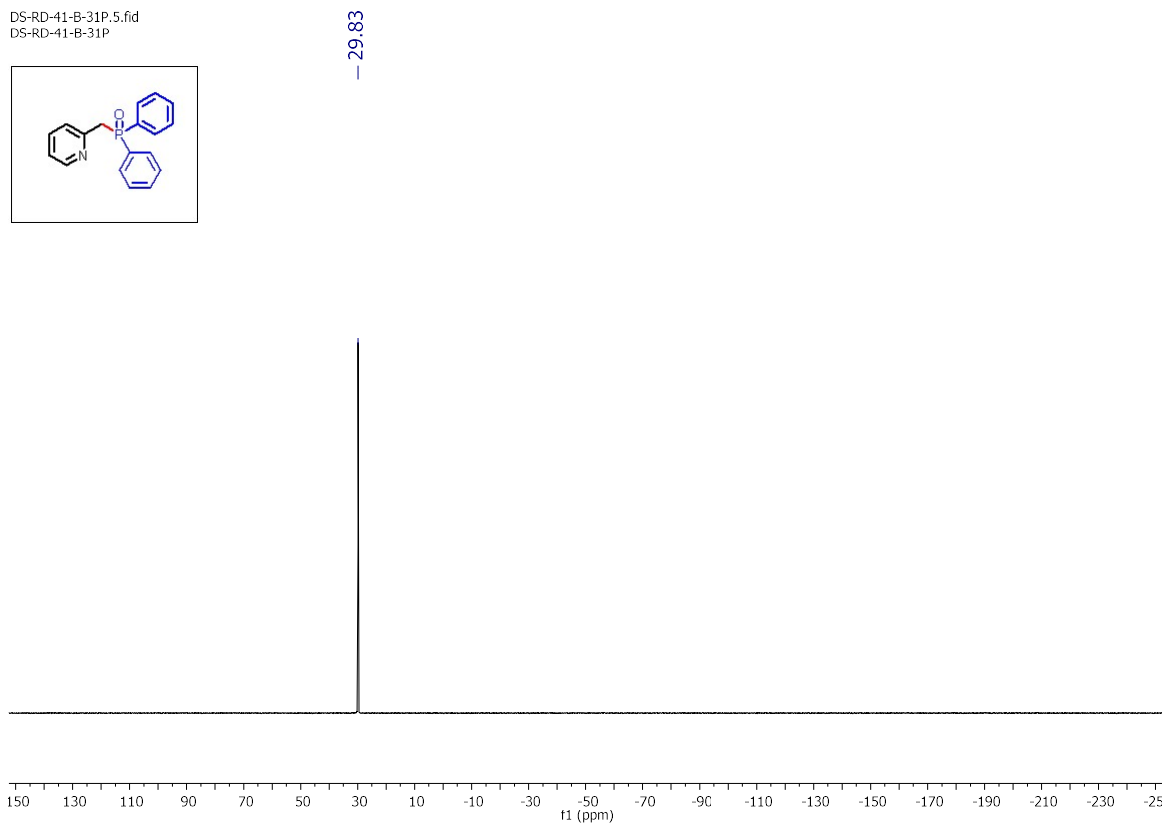

Figure S21.  $^1\text{H}$  NMR (500 MHz),  $^{13}\text{C}\{^1\text{H}\}$  NMR (125 MHz), and  $^{31}\text{P}\{^1\text{H}\}$  NMR (200 MHz) spectrum of Compound 3t in  $\text{CDCl}_3$

7.74  
7.73  
7.72  
7.71  
7.70  
7.54  
7.52  
7.52  
7.51  
7.47  
7.46  
7.45  
7.45  
7.44  
7.43  
7.08  
7.07  
6.86  
6.86  
6.85  
6.84  
6.83  
3.89  
3.86

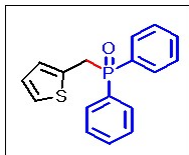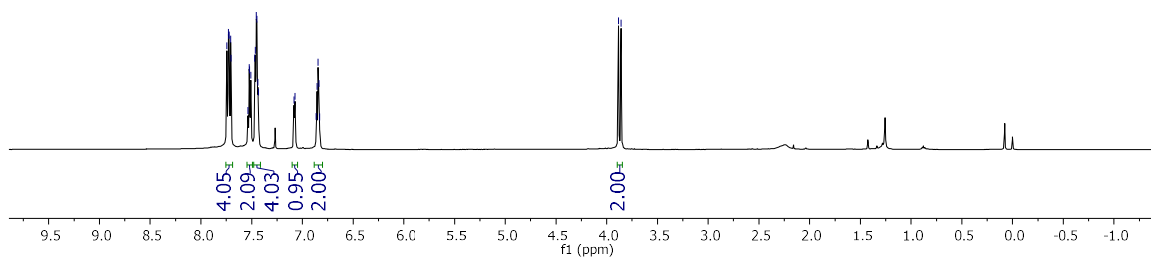

DS-RD-33-A-13C.3.fid  
DS-RD-33-A-13C

132.24  
132.20  
132.10  
132.08  
131.99  
131.92  
131.45  
131.30  
131.23  
128.72  
128.63  
127.94  
127.88  
127.12  
127.10  
125.01  
124.98

77.41  
77.16  
76.91

32.92  
32.38

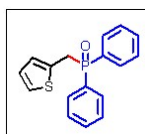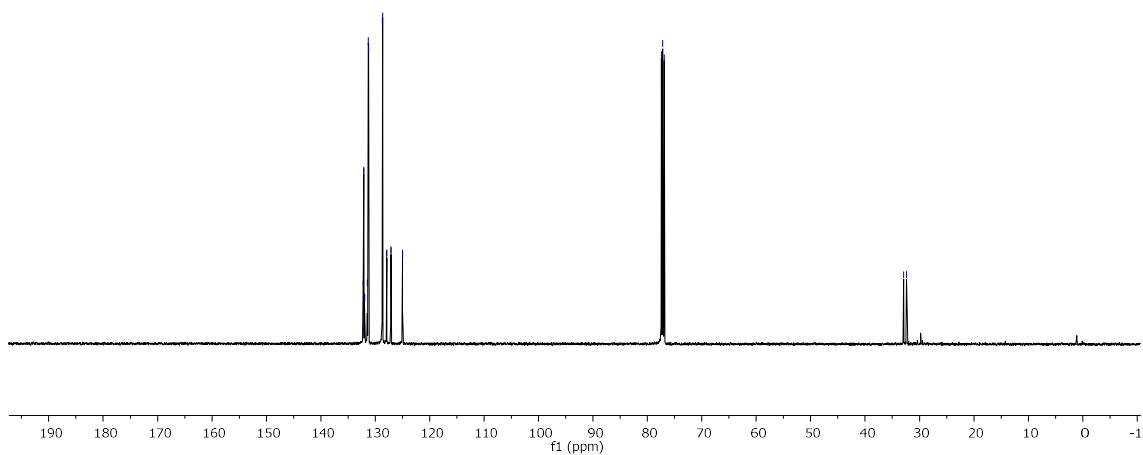

DS-RD-33-A-31P.5.fid  
DS-RD-33-A-31P

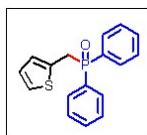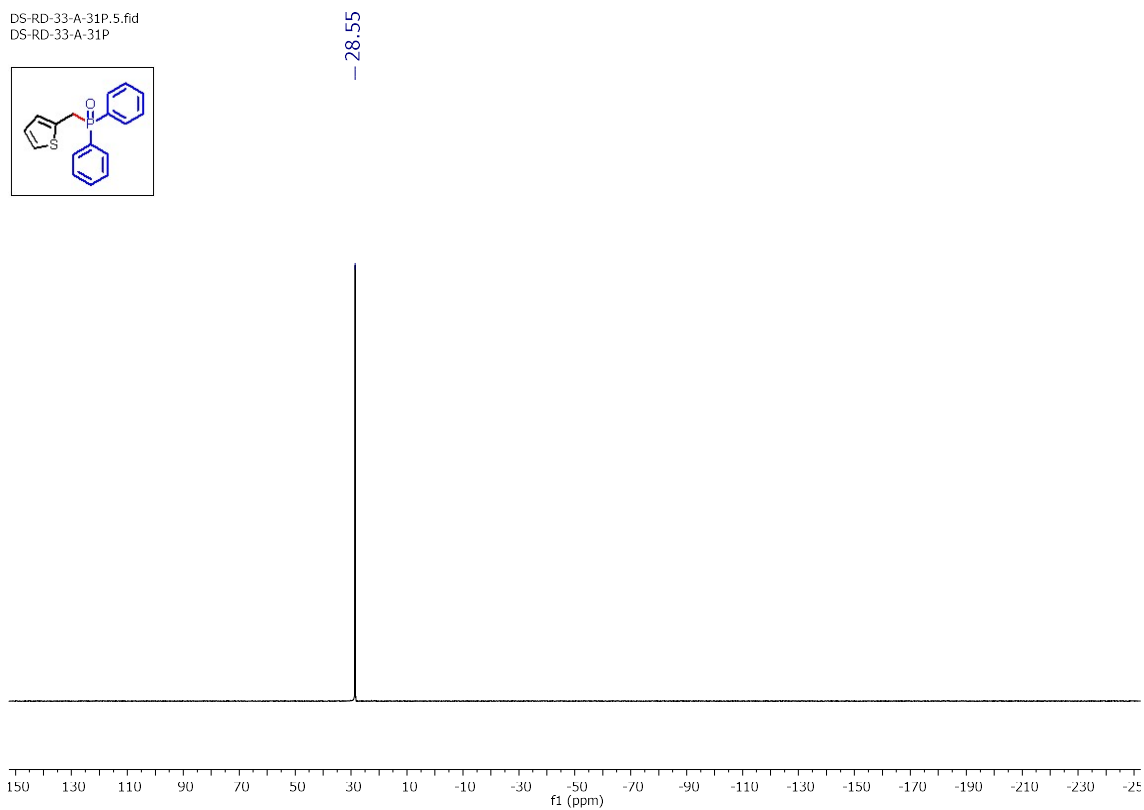

Figure S22.  $^1\text{H}$  NMR (500 MHz),  $^{13}\text{C}\{^1\text{H}\}$  NMR (125 MHz), and  $^{31}\text{P}\{^1\text{H}\}$  NMR (200 MHz) spectrum of Compound 3u in  $\text{CDCl}_3$

DS-HP-824-9  
 DS-HP-824-5  
 7.73  
 7.71  
 7.70  
 7.69  
 7.55  
 7.54  
 7.52  
 7.48  
 7.46  
 7.45  
 7.24  
 ~6.24  
 ~6.09

{ 3.77  
 { 3.75

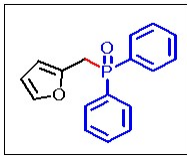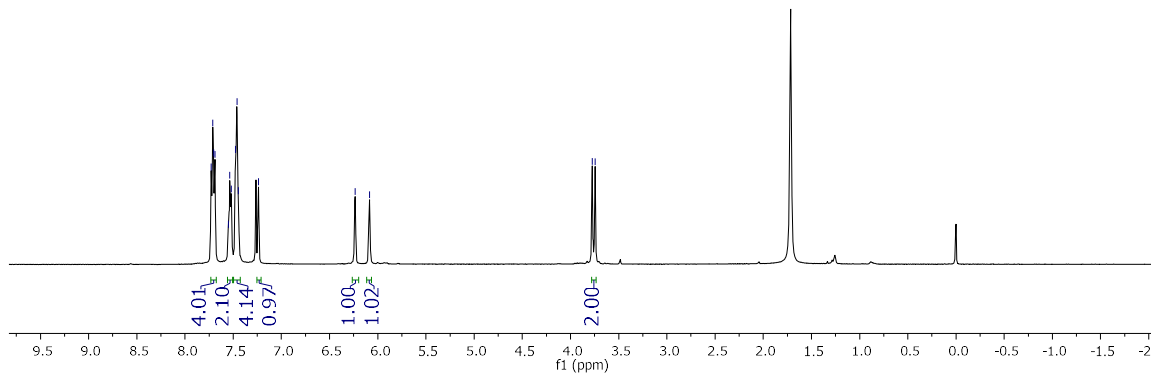

DS-HP-824-13C.3.fid  
 DS-HP-824-13C

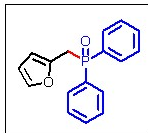

145.45  
 145.39  
 142.11  
 142.09  
 132.49  
 132.16  
 132.14  
 131.69  
 131.32  
 131.24  
 128.74  
 128.65  
 111.02  
 111.00  
 109.27  
 109.22

{ 77.41  
 { 77.16  
 { 76.91

{ 31.79  
 { 31.24

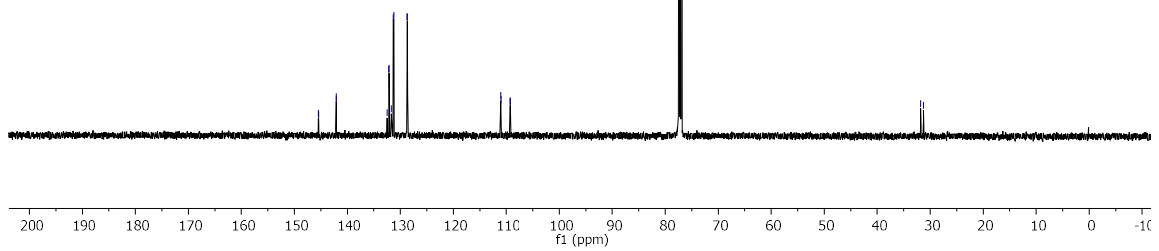

DS-HP-824-31P.5.fid  
DS-HP-824-31P

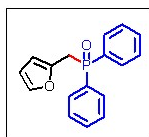

-28.32

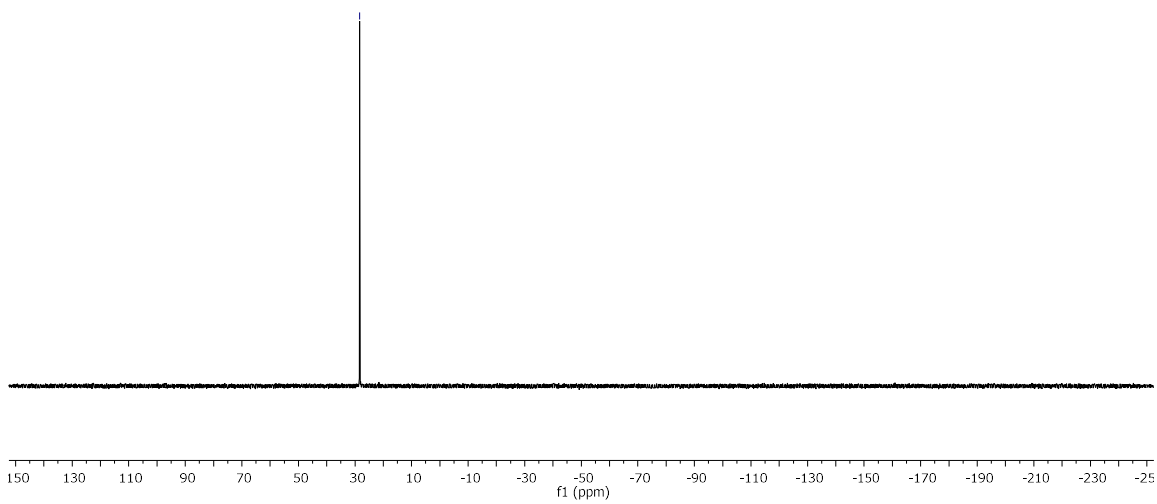

Figure S23. <sup>1</sup>H NMR (500 MHz), <sup>13</sup>C {<sup>1</sup>H} NMR (125 MHz), and <sup>31</sup>P {<sup>1</sup>H} NMR (200 MHz) spectrum of Compound 3v in CDCl<sub>3</sub>

DS-HP-799-B-1117  
 DS-HP-799-B-1117

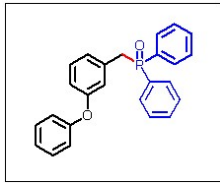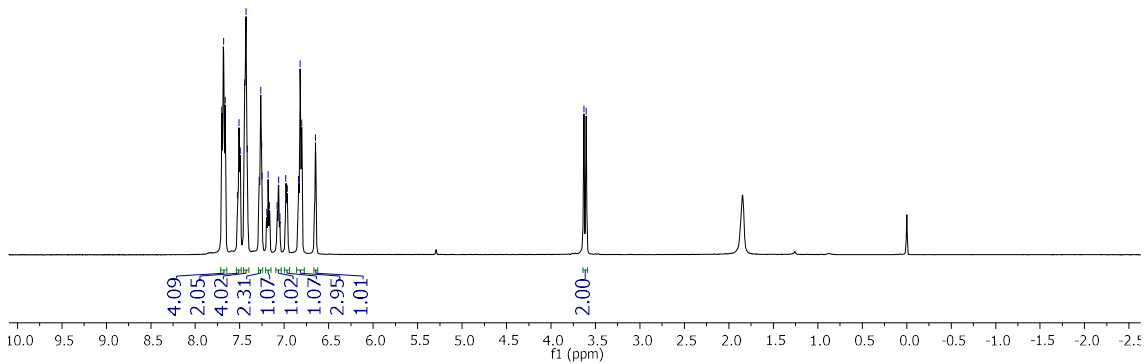

DS-HP-799-B-1117  
 DS-HP-799-B-1117

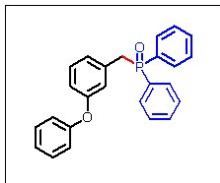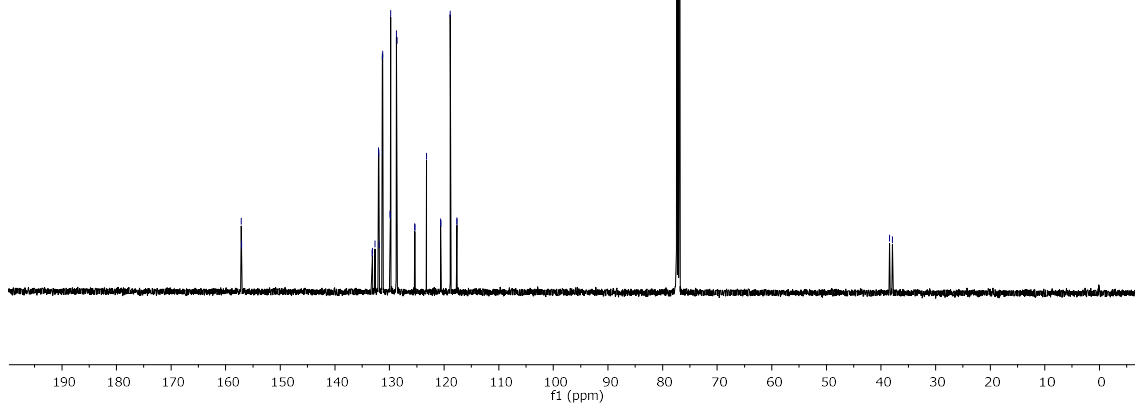

DS-HP-799-B-31P.5.fid  
DS-HP-799-B-31P

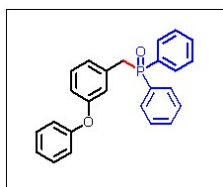

-29.36

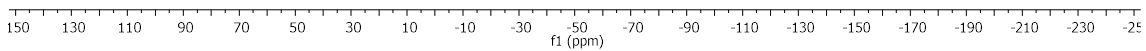

Figure S24.  $^1\text{H}$  NMR (500 MHz),  $^{13}\text{C}$   $\{^1\text{H}\}$  NMR (125 MHz), and  $^{31}\text{P}$   $\{^1\text{H}\}$  NMR (200 MHz) spectrum of Compound 3x in  $\text{CDCl}_3$

DS-RD-123-13C.12.fid  
 DS-RD-123-13C.1H  
 7.770  
 7.770  
 7.768  
 7.53  
 7.52  
 7.50  
 7.46  
 7.45  
 7.43  
 6.65  
 6.63  
 6.61  
 6.53  
 6.52  
 5.88

3.58  
 3.56

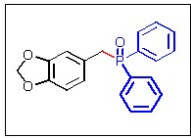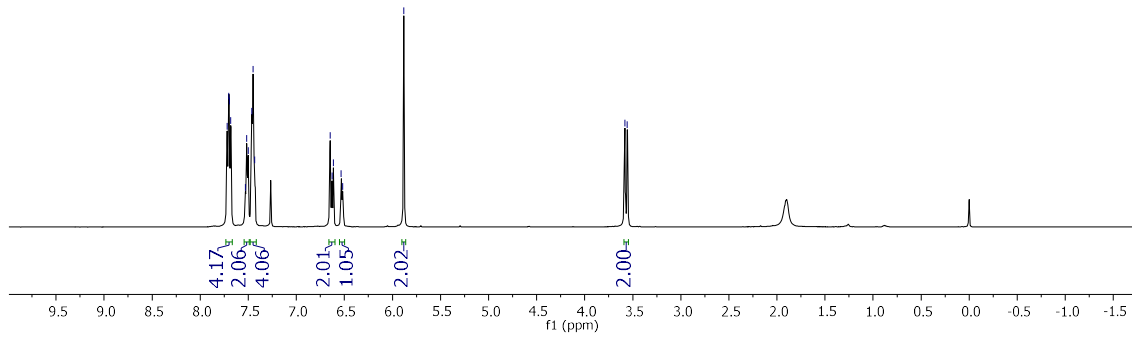

DS-RD-123-13C.12.fid  
 DS-RD-123-13C

147.70  
 147.68  
 146.70  
 146.68  
 132.78  
 131.98  
 131.96  
 131.30  
 131.23  
 128.72  
 128.62  
 124.61  
 124.54  
 123.46  
 123.41  
 110.68  
 110.64  
 108.33  
 108.31  
 101.04

77.41  
 77.16  
 76.91  
 38.03  
 37.50

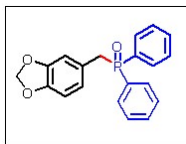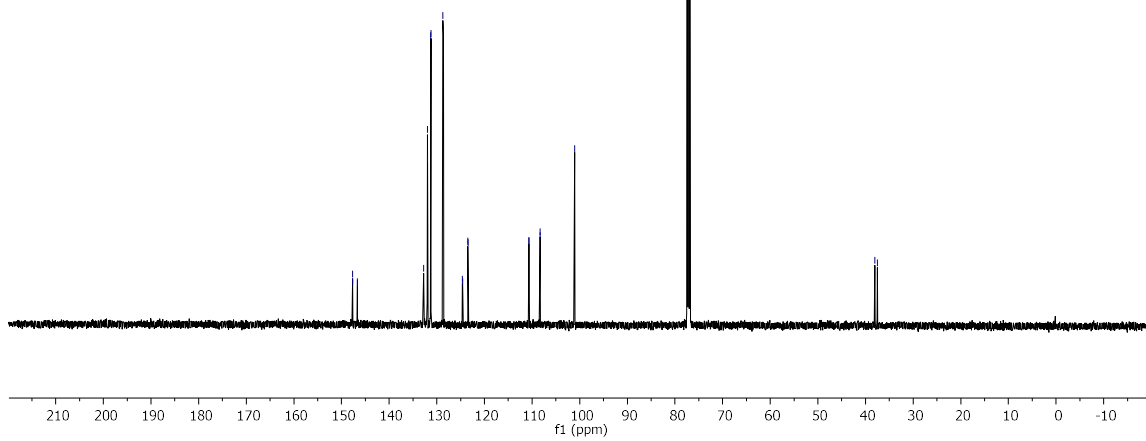

DS-RD-123-31P.14.fid  
DS-RD-123-31P

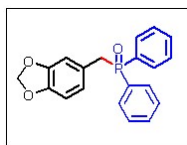

- 29.40

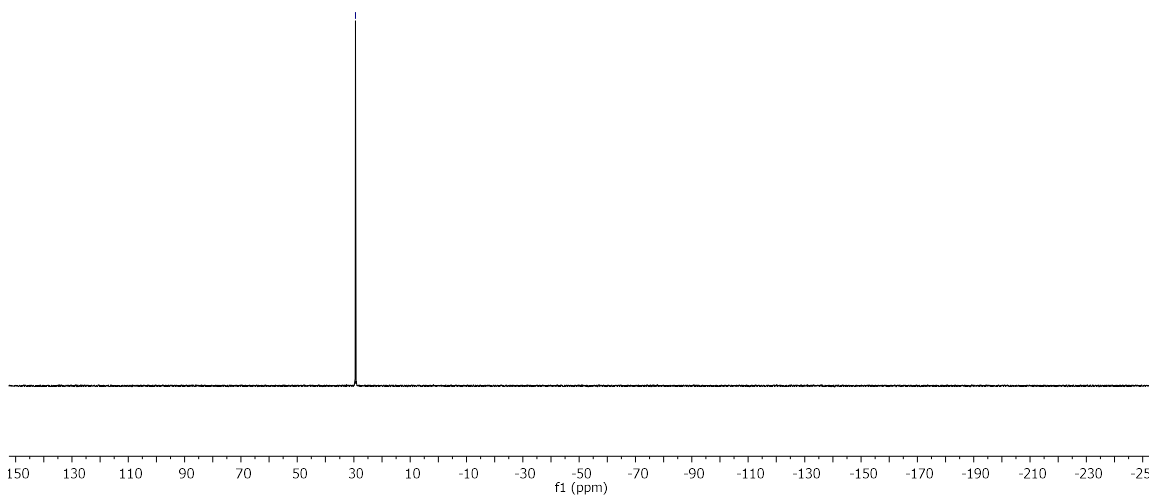

Figure S25. <sup>1</sup>H NMR (500 MHz), <sup>13</sup>C {<sup>1</sup>H} NMR (125 MHz), and <sup>31</sup>P {<sup>1</sup>H} NMR (200 MHz) spectrum of Compound 3y in CDCl<sub>3</sub>

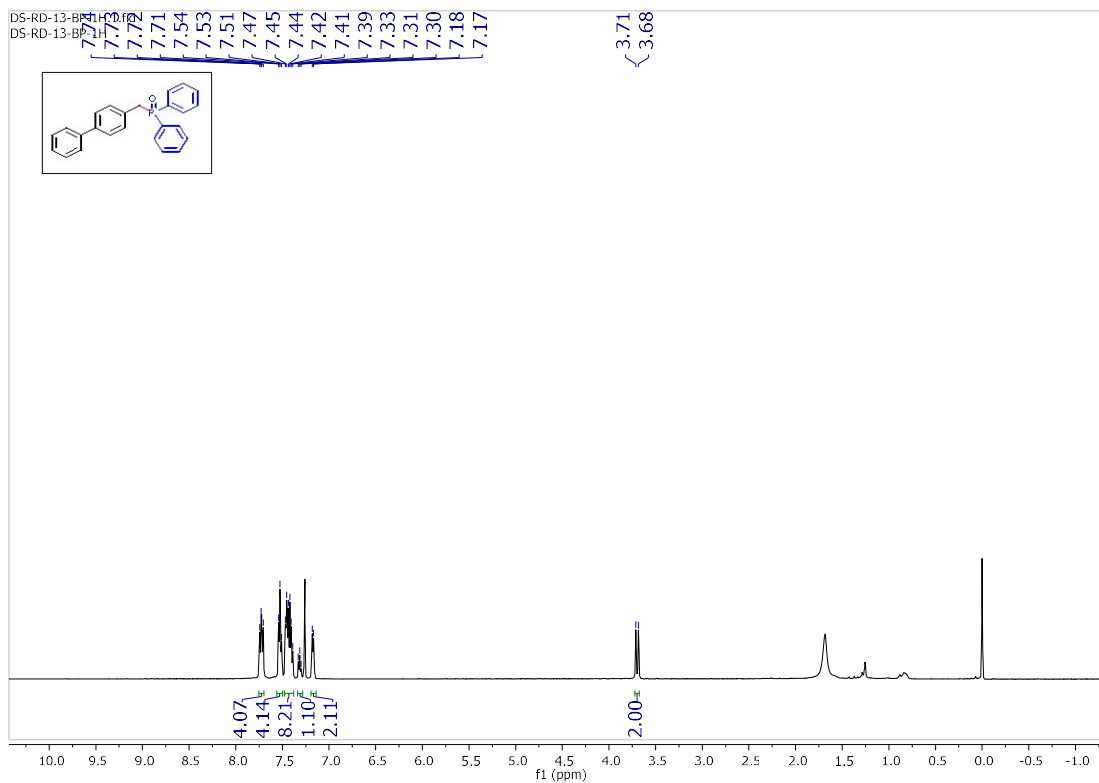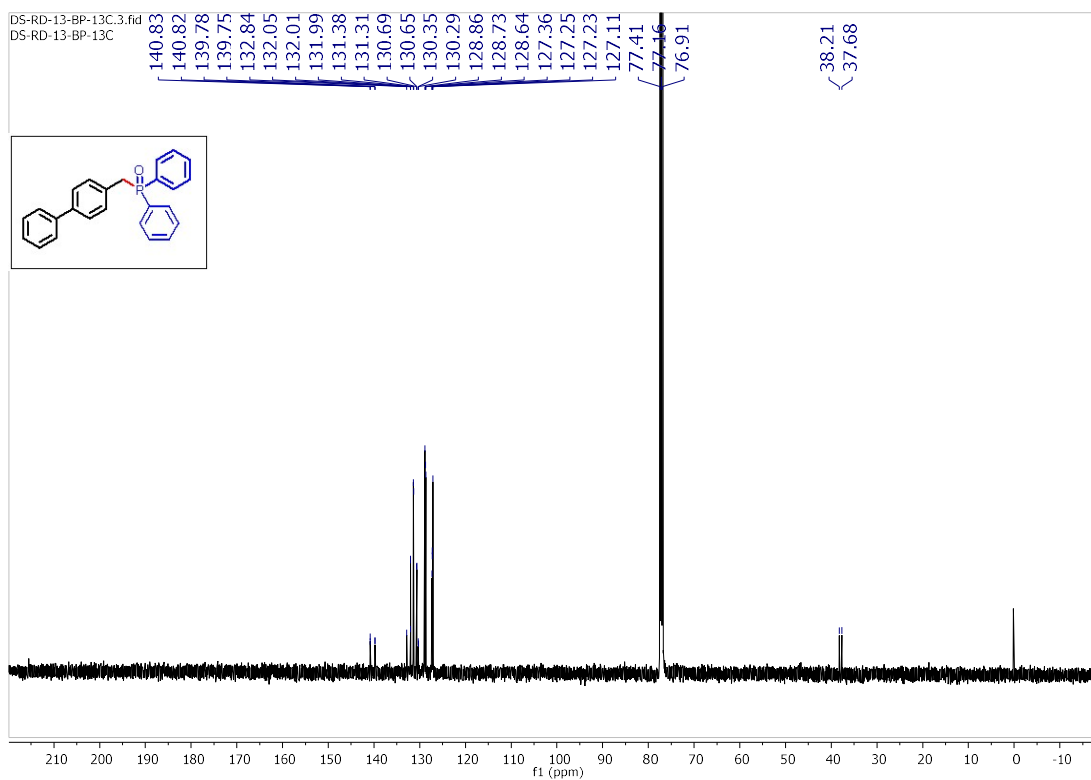

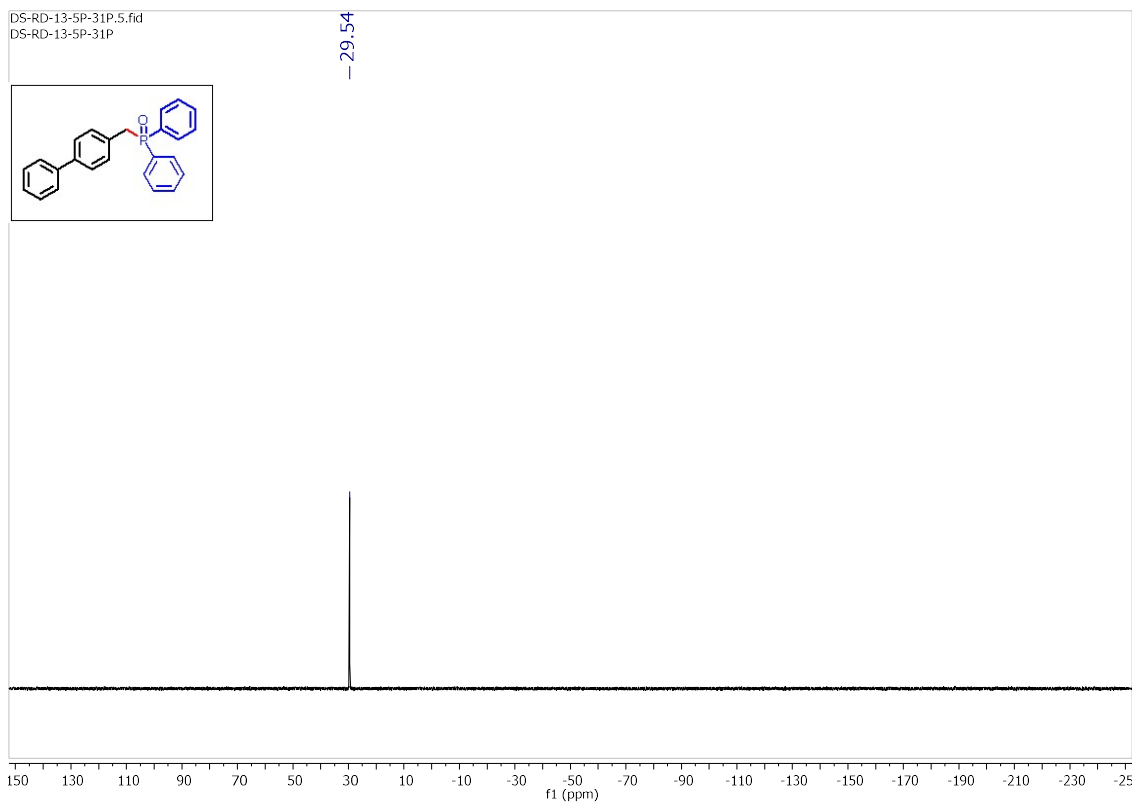

Figure S26.  $^1\text{H}$  NMR (500 MHz),  $^{13}\text{C}\{^1\text{H}\}$  NMR (125 MHz), and  $^{31}\text{P}\{^1\text{H}\}$  NMR (200 MHz) spectrum of Compound 3z in  $\text{CDCl}_3$

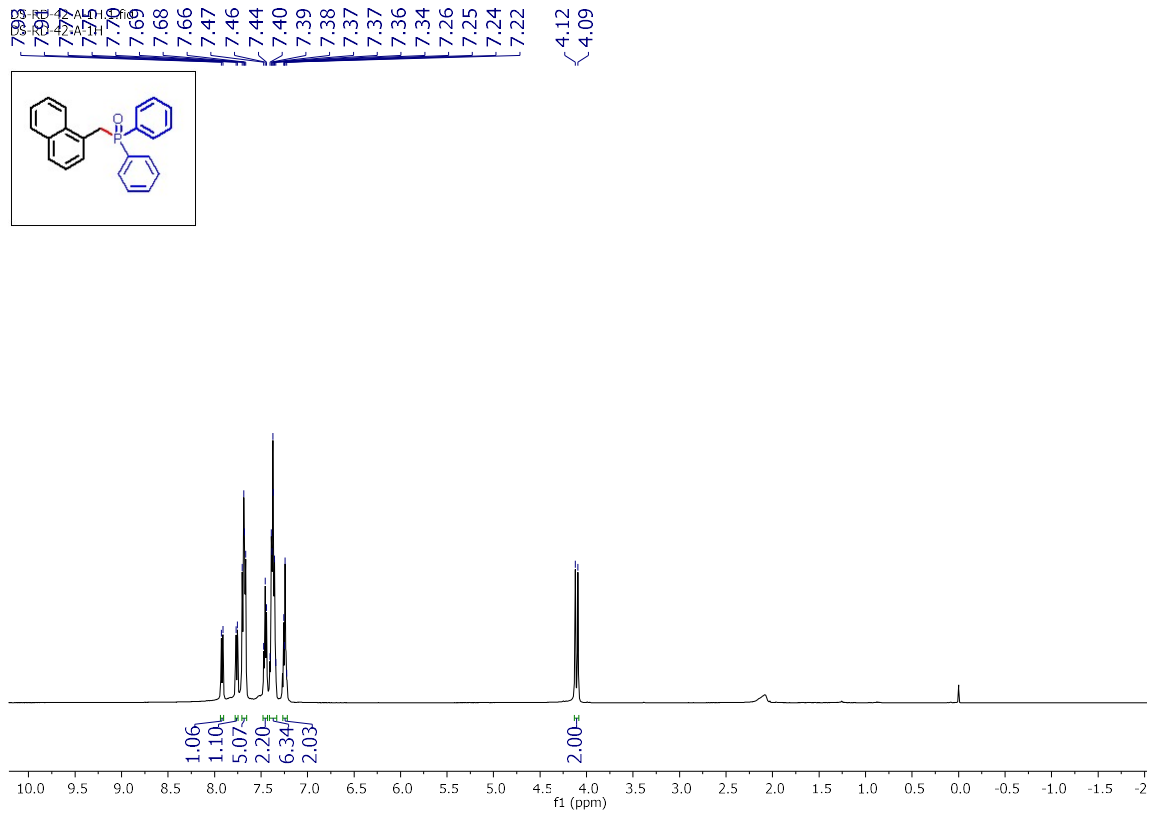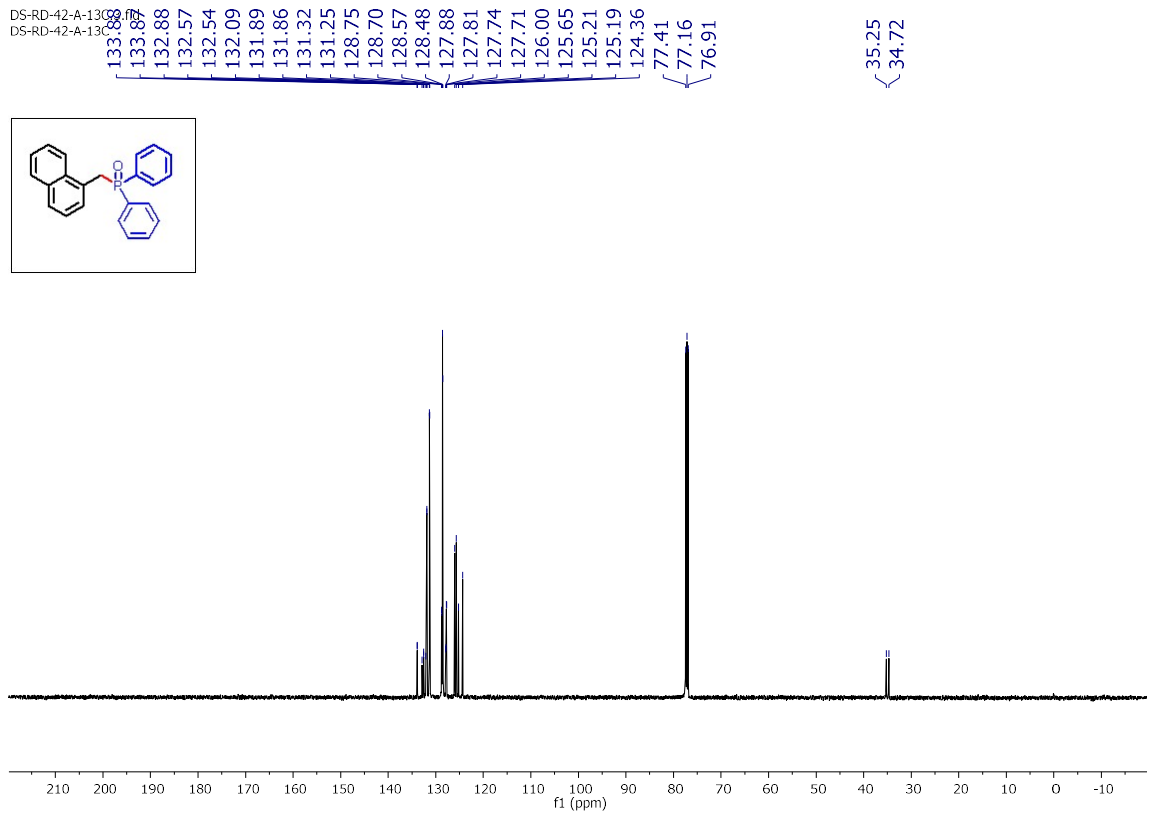

DS-RD-42-A-31P.5.fic  
DS-RD-42-A-31P

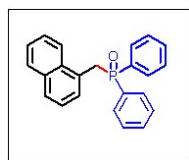

-29.54

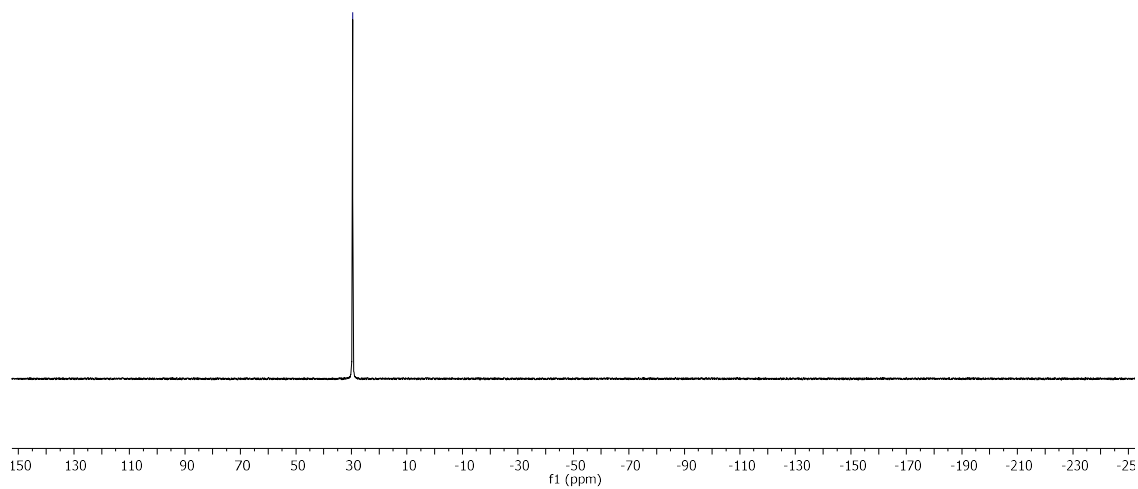

Figure S27.  $^1\text{H}$  NMR (500 MHz),  $^{13}\text{C}\{^1\text{H}\}$  NMR (125 MHz), and  $^{31}\text{P}\{^1\text{H}\}$  NMR (200 MHz) spectrum of Compound 3aa in  $\text{CDCl}_3$

DS-HP-18  
DS-HP-18  
7.78  
7.73  
7.69  
7.67  
7.65  
7.56  
7.52  
7.50  
7.48  
7.44  
7.42  
7.40  
7.26  
7.24  
7.22

3.82  
3.79

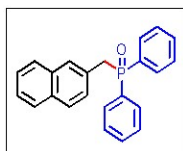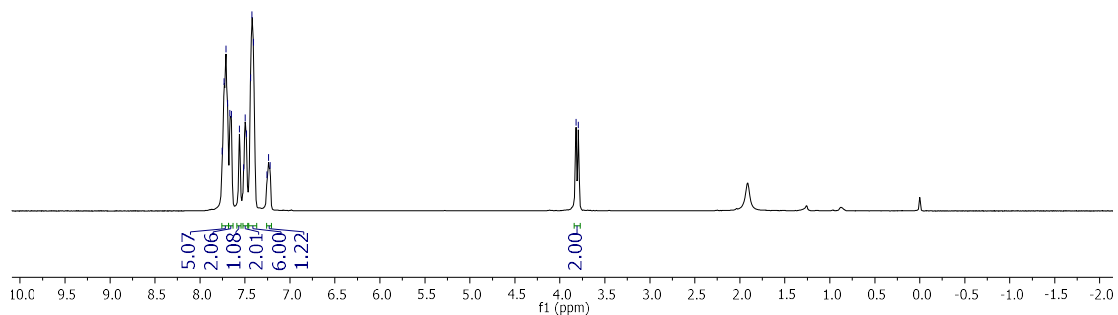

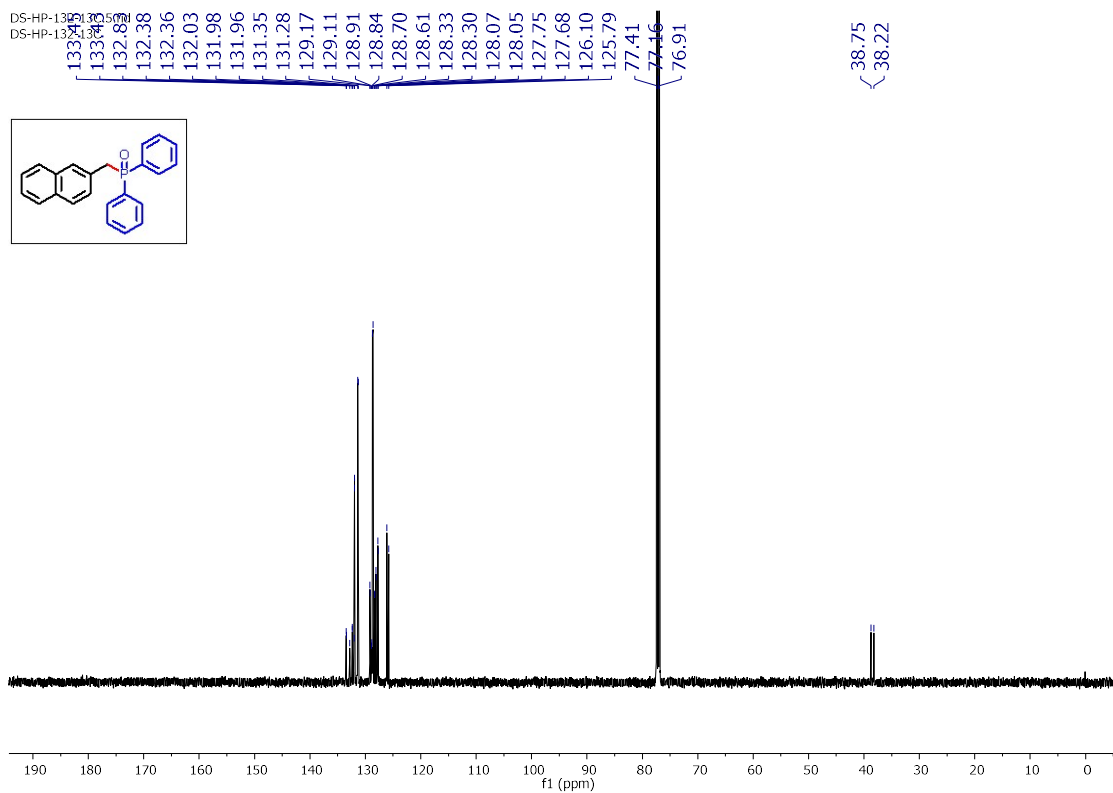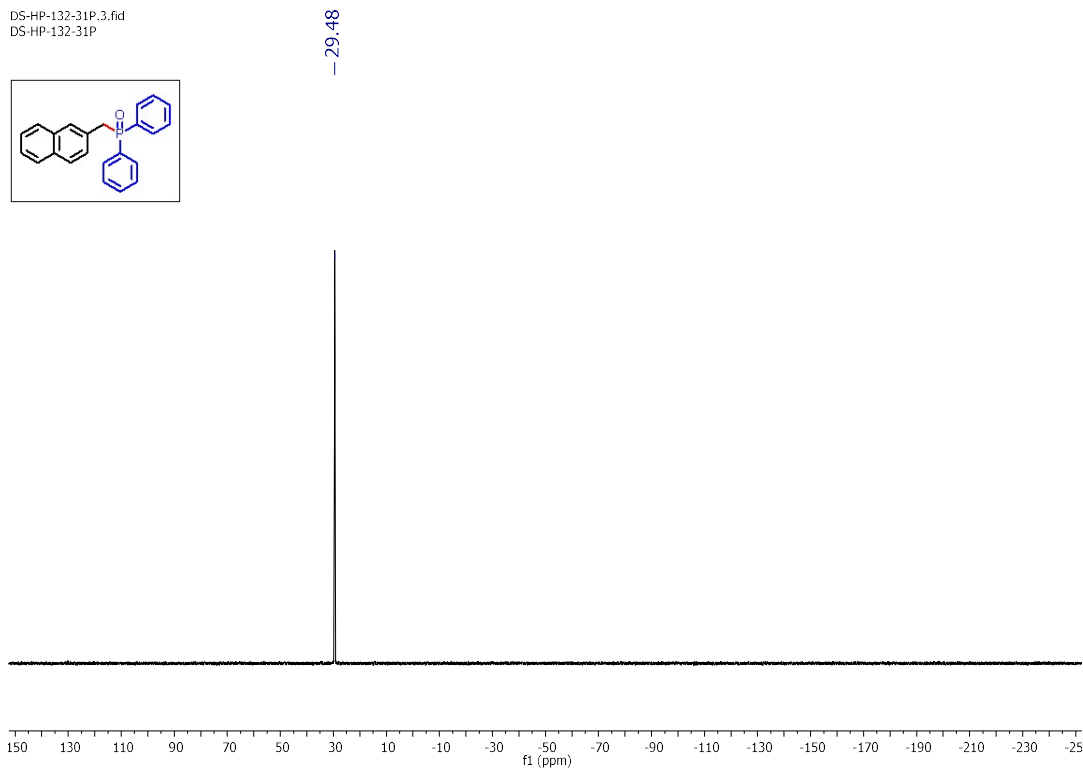

Figure S28.  $^1\text{H}$  NMR (500 MHz),  $^{13}\text{C}\{^1\text{H}\}$  NMR (125 MHz), and  $^{31}\text{P}\{^1\text{H}\}$  NMR (200 MHz) spectrum of Compound 3ab in  $\text{CDCl}_3$

DS-HP-705-A-13C.25.fid  
 DS-HP-705-A-13C

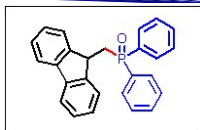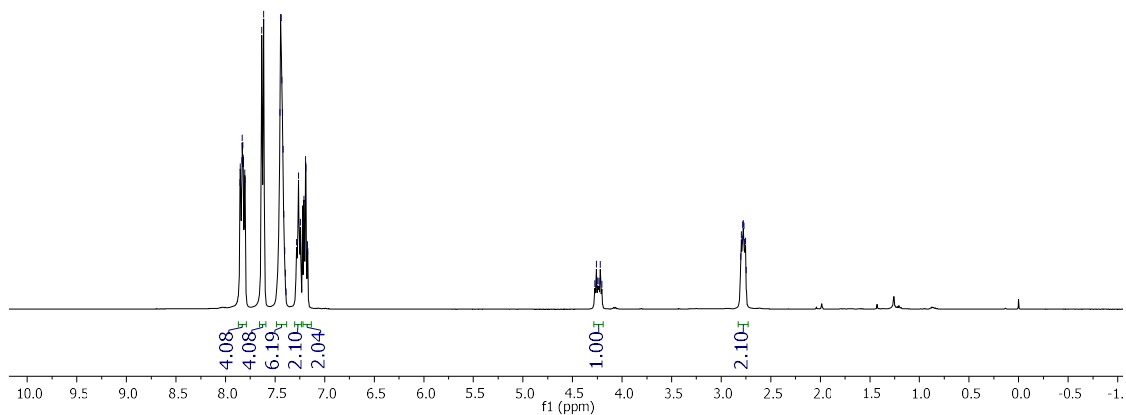

DS-HP-705-A-13C.25.fid  
 DS-HP-705-A-13C

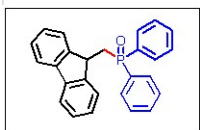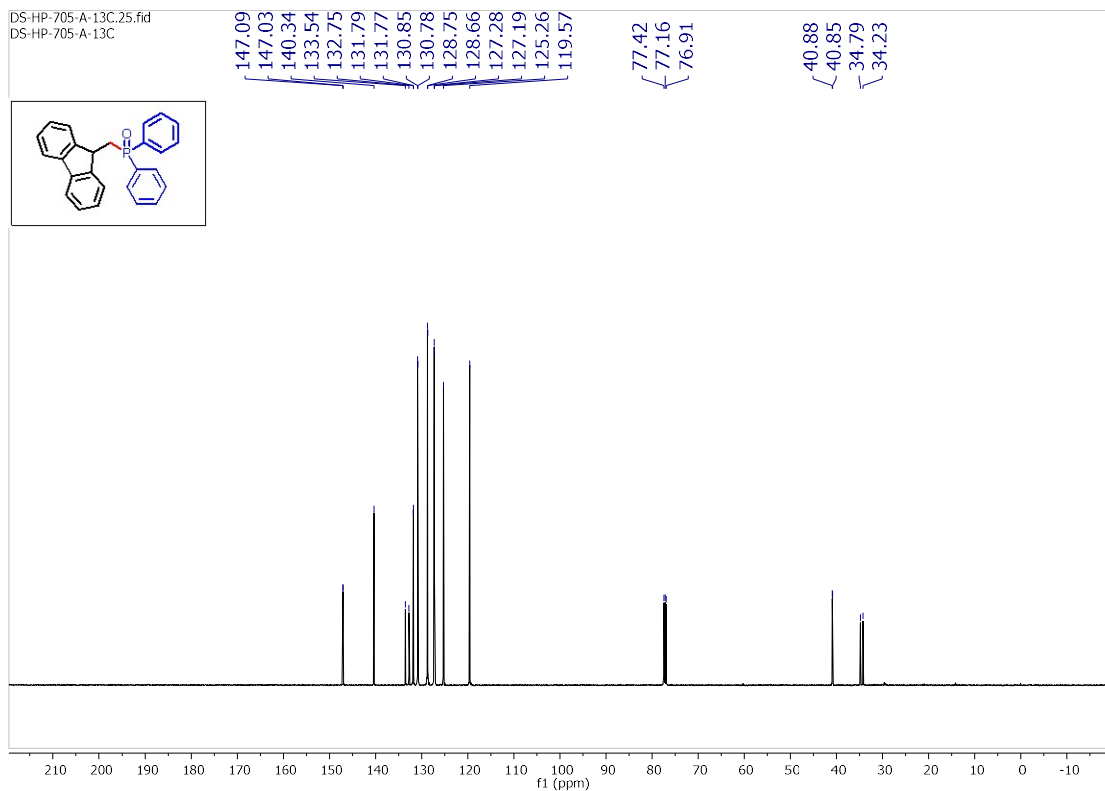

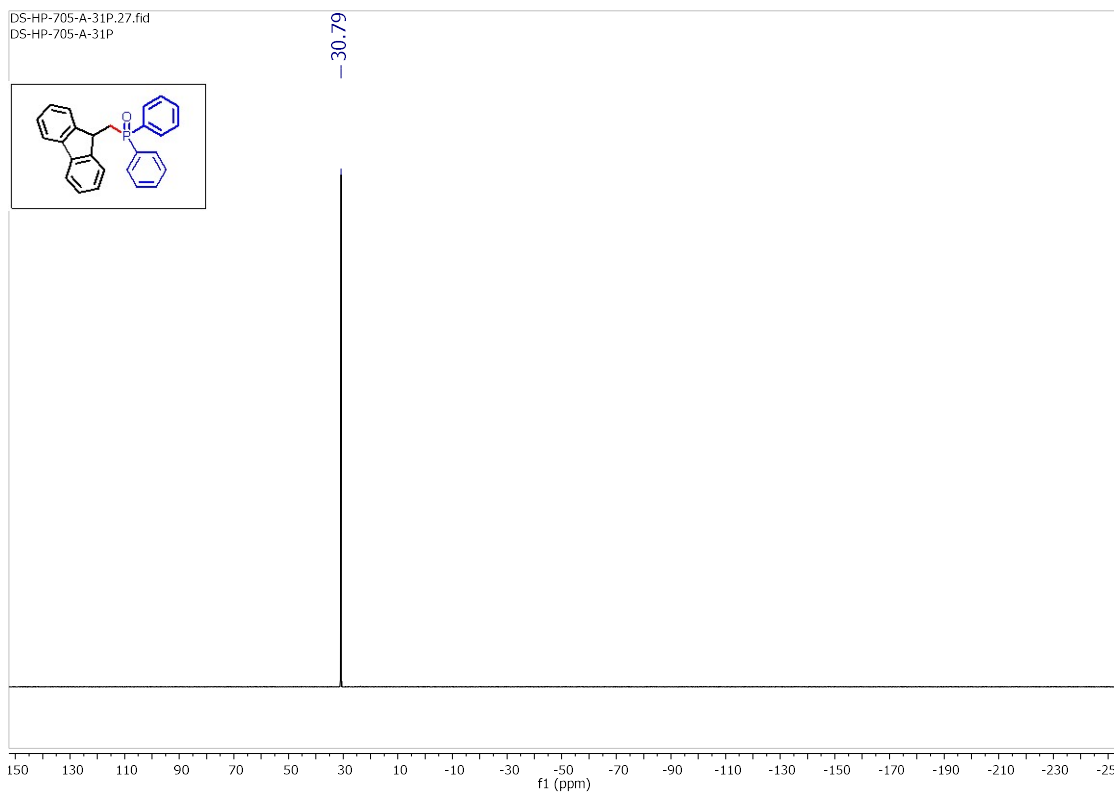

Figure S29.  $^1\text{H}$  NMR (500 MHz),  $^{13}\text{C}$   $\{^1\text{H}\}$  NMR (125 MHz), and  $^{31}\text{P}$   $\{^1\text{H}\}$  NMR (200 MHz) spectrum of Compound 3ac in  $\text{CDCl}_3$

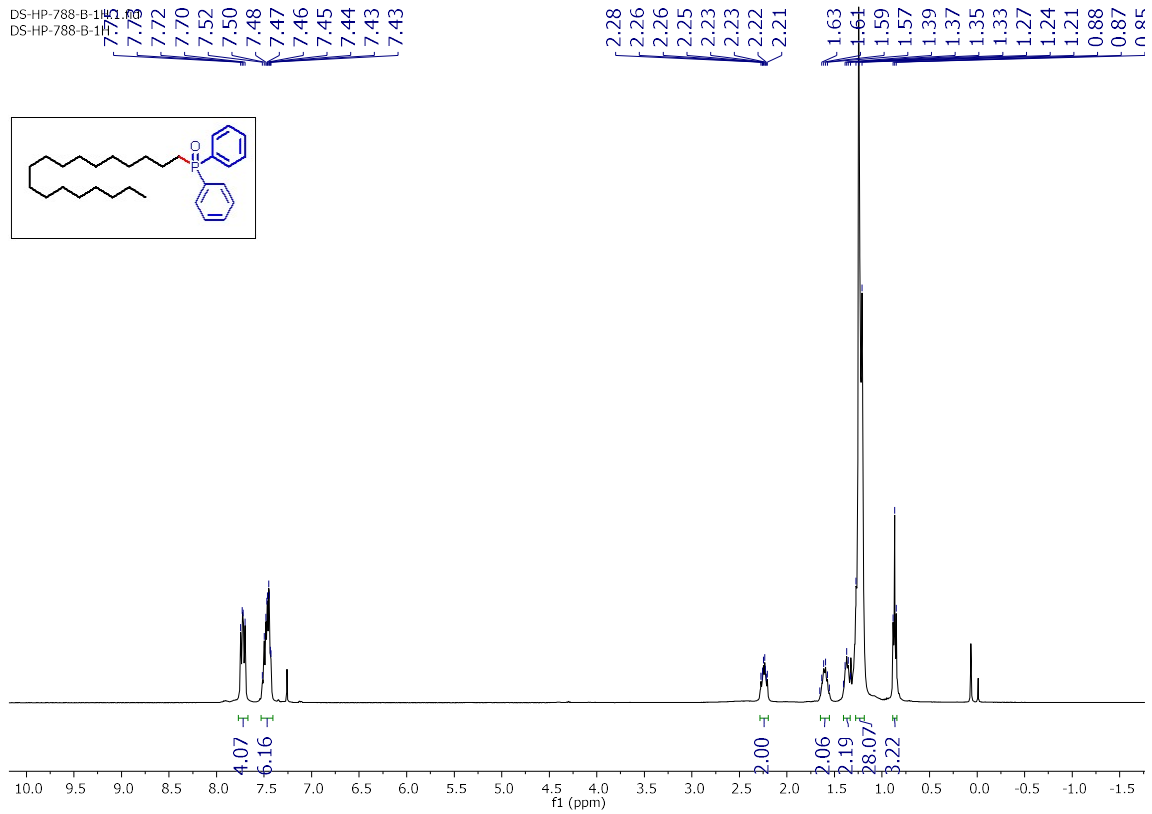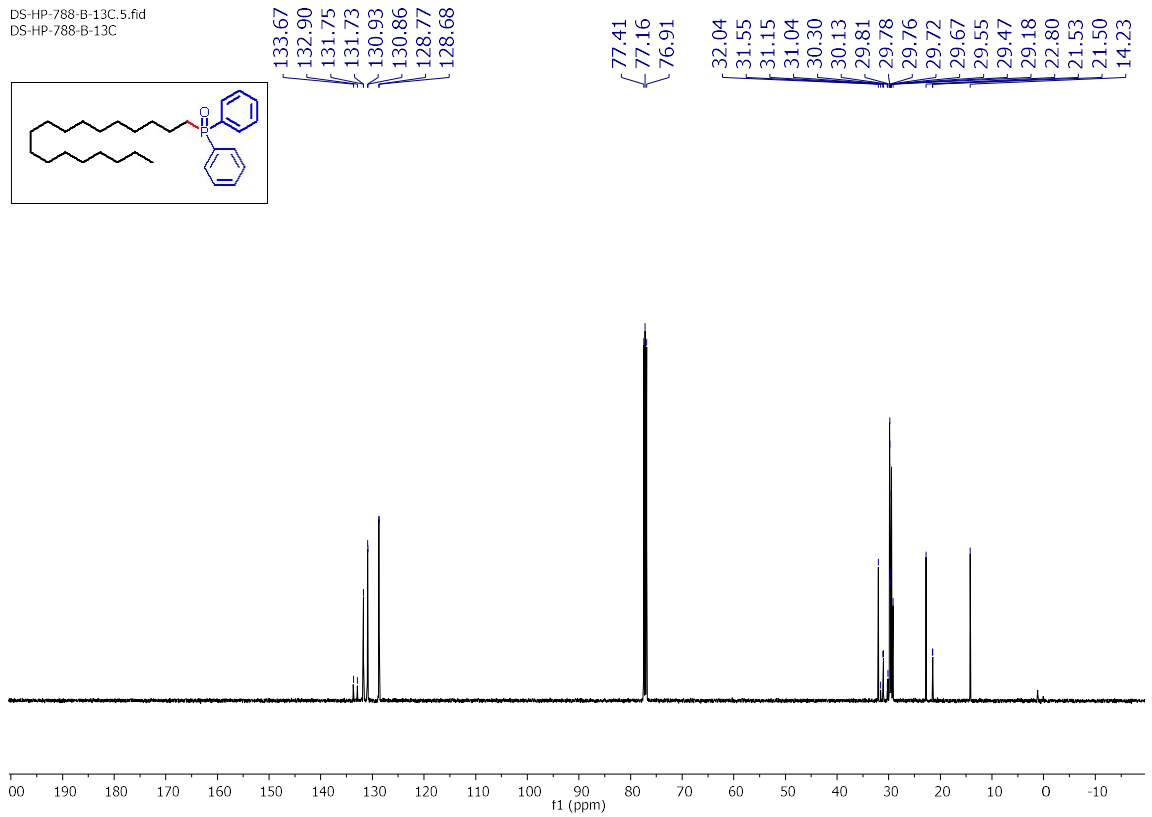

DS-HP-788-B-31P.3.fid  
DS-HP-788-B-31P

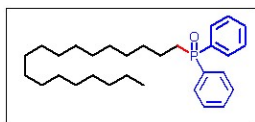

-32.76

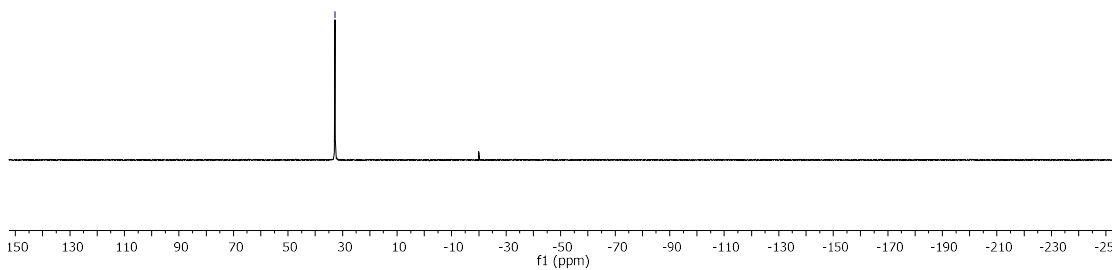

Figure S30.  $^1\text{H}$  NMR (500 MHz),  $^{13}\text{C}\{^1\text{H}\}$  NMR (125 MHz), and  $^{31}\text{P}\{^1\text{H}\}$  NMR (200 MHz) spectrum of Compound 3ad in  $\text{CDCl}_3$

DS-HP-RD-72-B-1H  
DS-HP-RD-72-B-1H

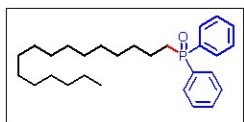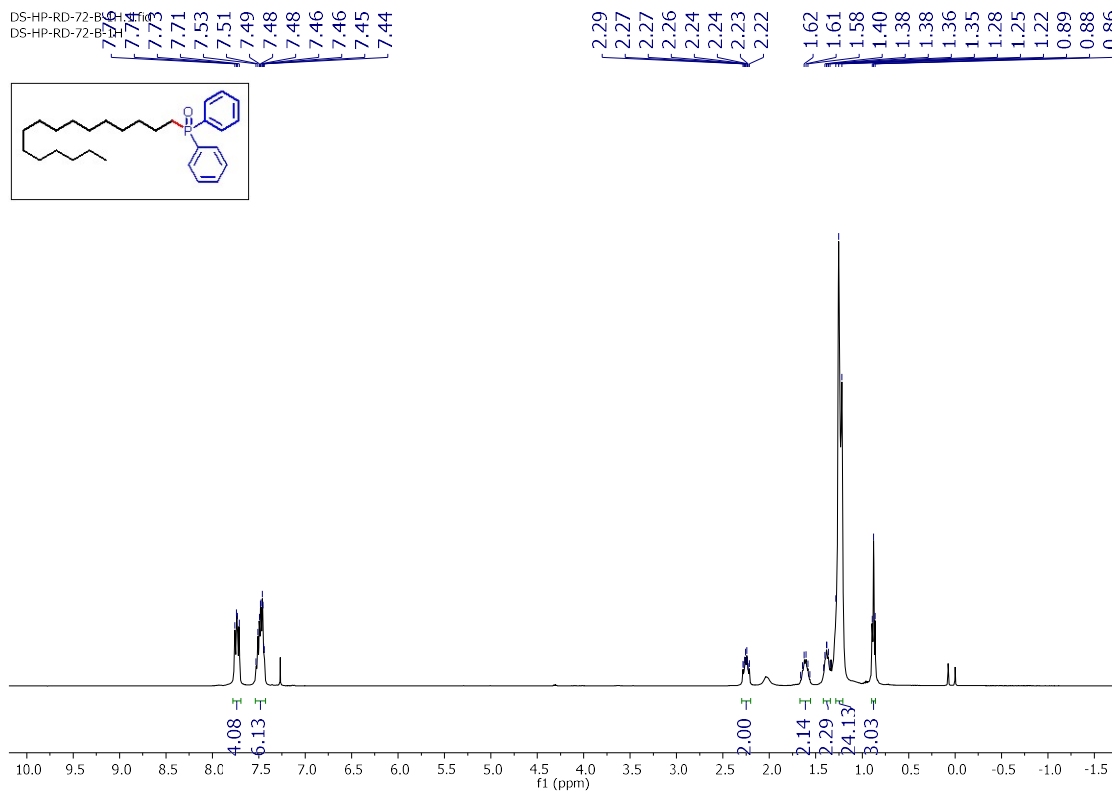

DS-HP-RD-72B-13C.3.fid  
DS-HP-RD-72B-13C

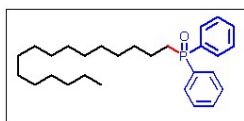

133.72  
132.94  
131.75  
131.73  
130.94  
130.87  
128.78  
128.69

77.41  
77.16  
76.91

32.04  
31.16  
31.05  
30.15  
29.81  
29.80  
29.79  
29.77  
29.72  
29.67  
29.57  
29.48  
29.19  
22.81  
21.54  
21.51  
14.24

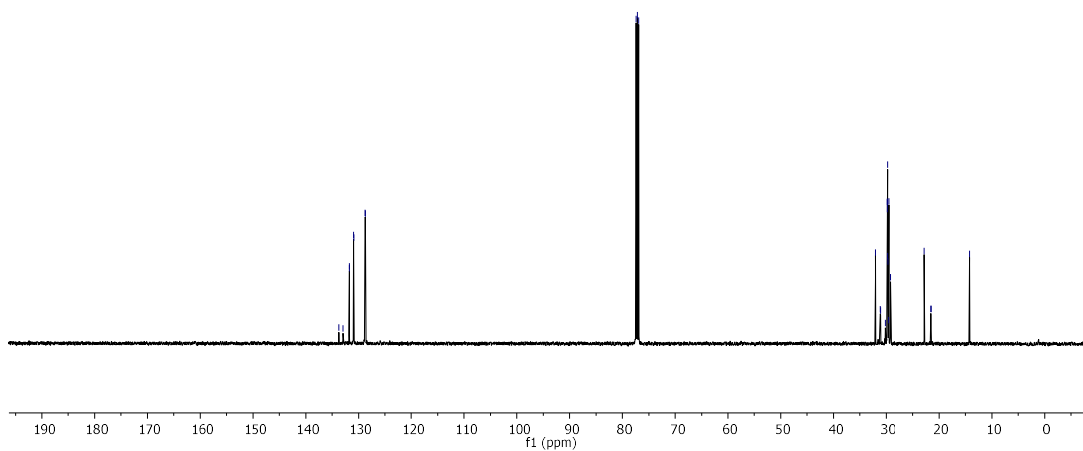

DS-HP-RD-72B-31P.5.fic  
DS-HP-RD-72B-31P

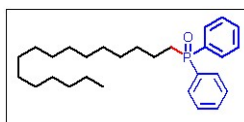

-32.70

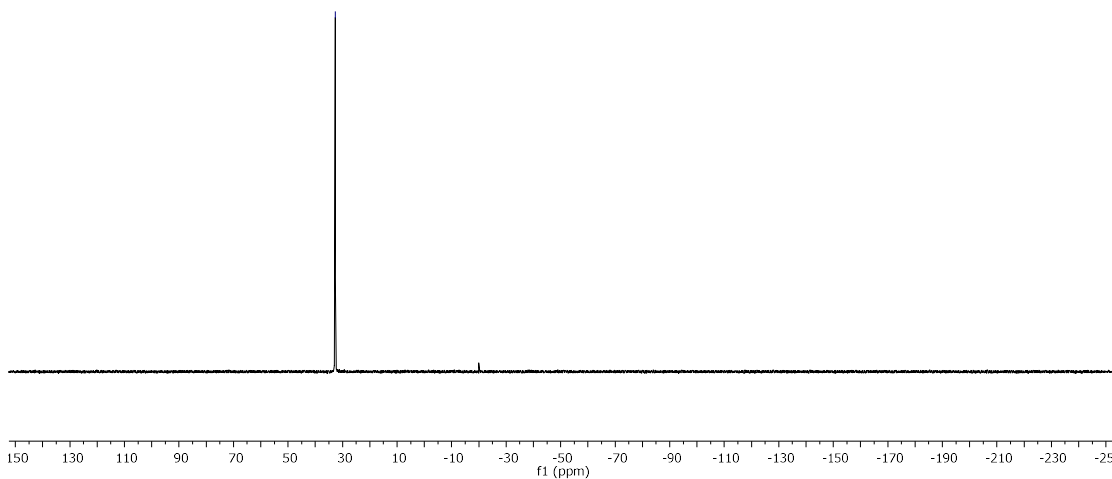

Figure S31.  $^1\text{H}$  NMR (500 MHz),  $^{13}\text{C}$   $\{^1\text{H}\}$  NMR (125 MHz), and  $^{31}\text{P}$   $\{^1\text{H}\}$  NMR (200 MHz) spectrum of Compound 3ae in  $\text{CDCl}_3$

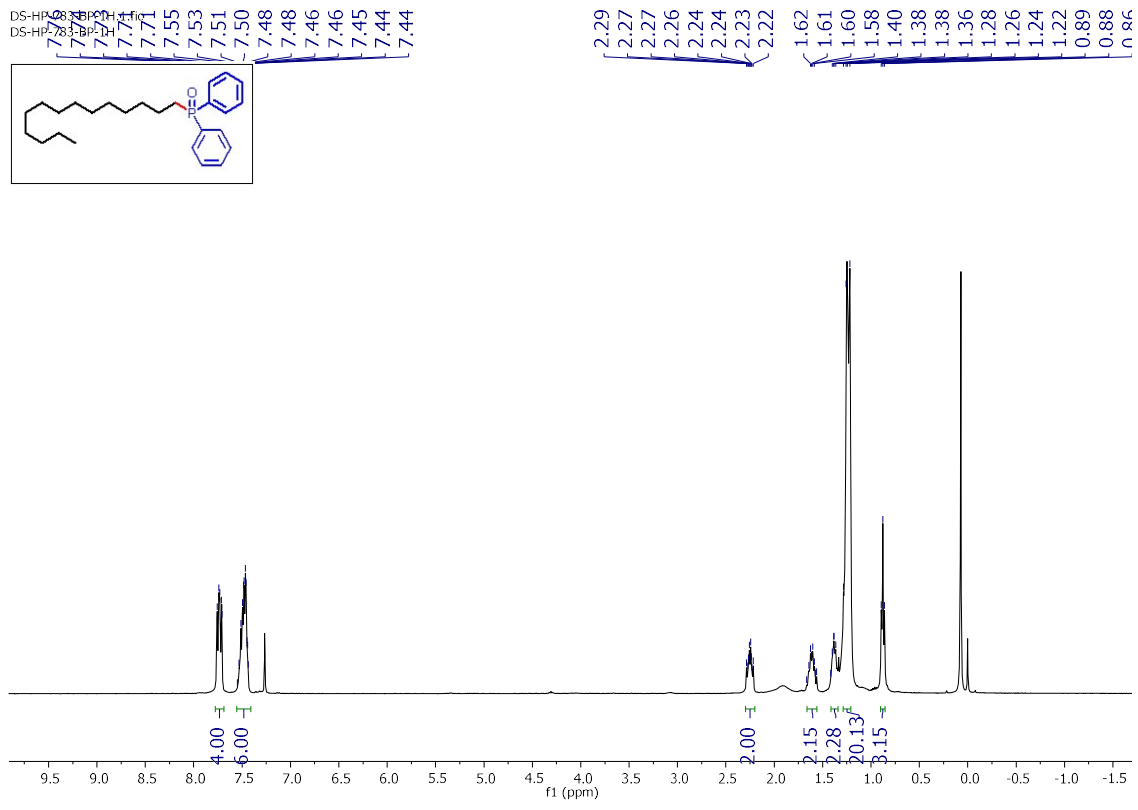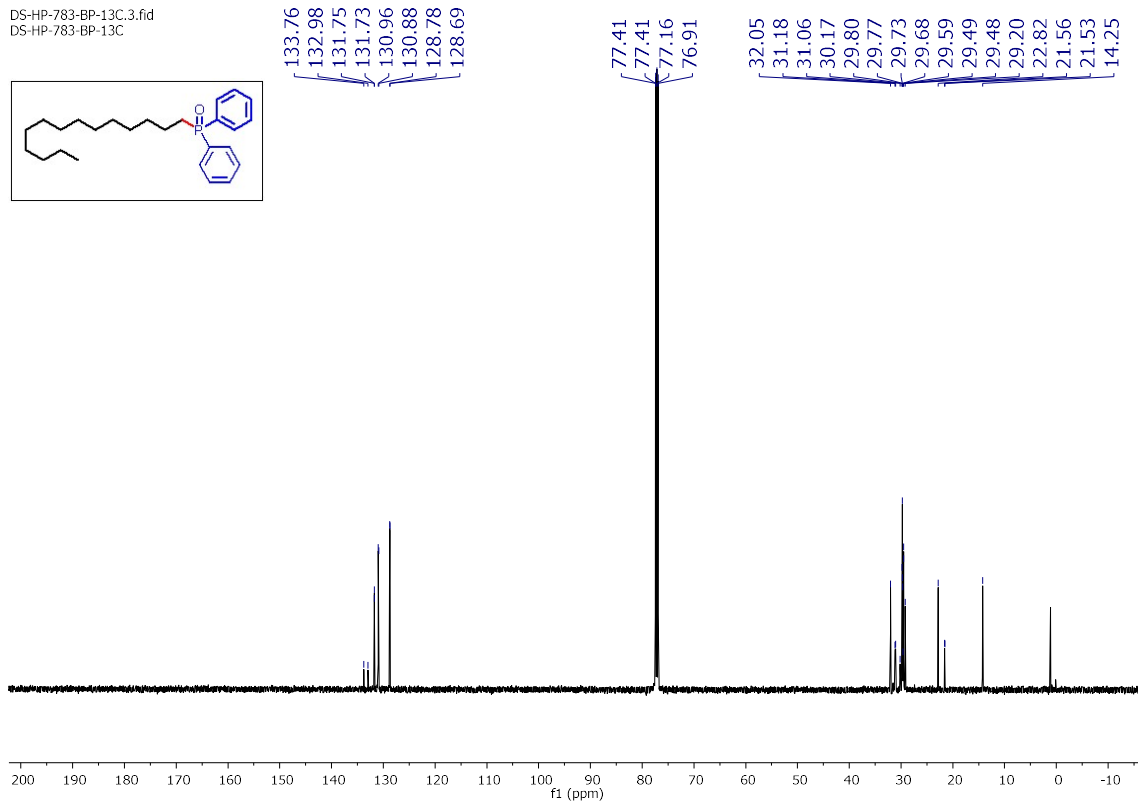

DS-HP-783-BP-31P.3.fid  
DS-HP-783-BP-31P

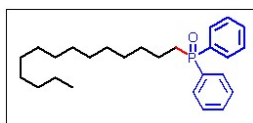

-32.61

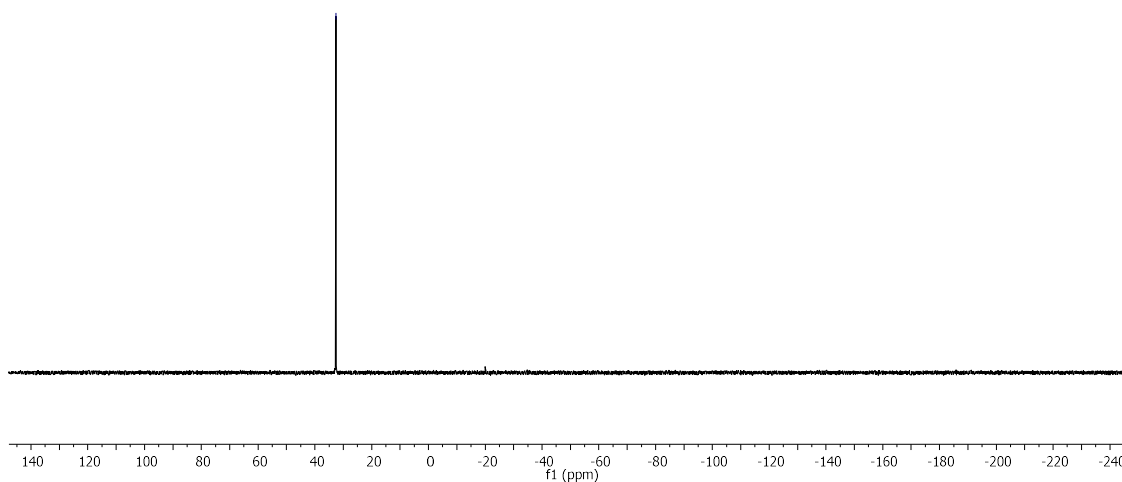

Figure S32.  $^1\text{H}$  NMR (500 MHz),  $^{13}\text{C}\{^1\text{H}\}$  NMR (125 MHz), and  $^{31}\text{P}\{^1\text{H}\}$  NMR (200 MHz) spectrum of Compound 3af in  $\text{CDCl}_3$

DS-RD-71-A-1H.1.fid  
DS-RD-71-A-1H

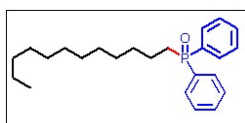

7.75  
7.74  
7.73  
7.71  
7.53  
7.51  
7.50  
7.48  
7.46  
7.45

2.28  
2.26  
2.24  
2.22

1.62  
1.60  
1.40  
1.38  
1.37  
1.28  
1.26  
1.25  
1.24  
1.22  
0.89  
0.87  
0.86

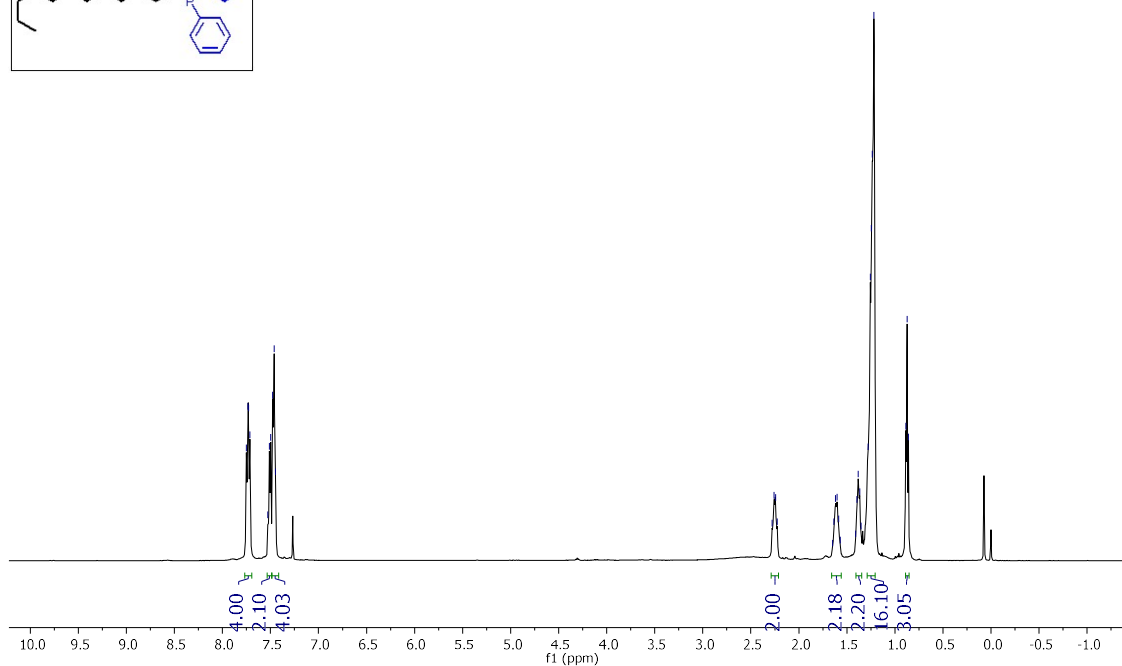

DS-RD-71-A-13C.3.fid  
DS-RD-71-A-13C

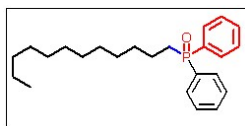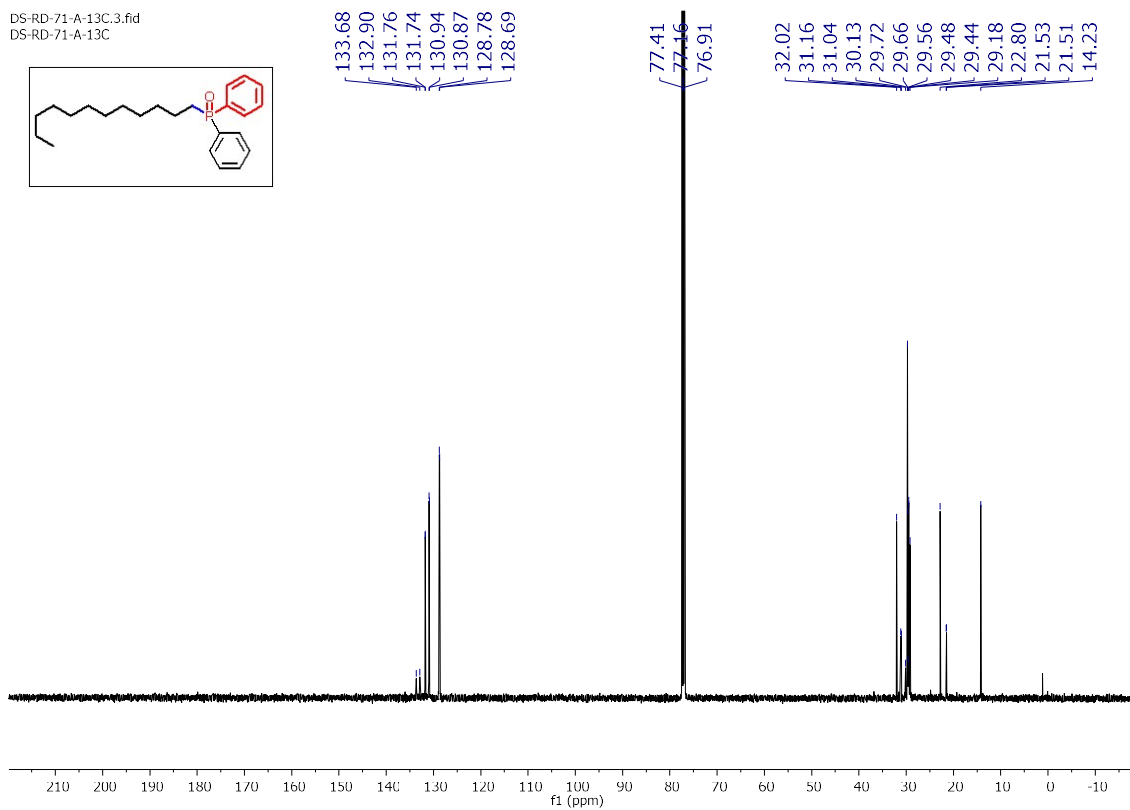

DS-RD-71-A-31P.5.fid  
DS-RD-71-A-31P

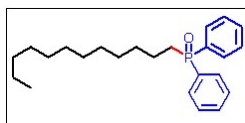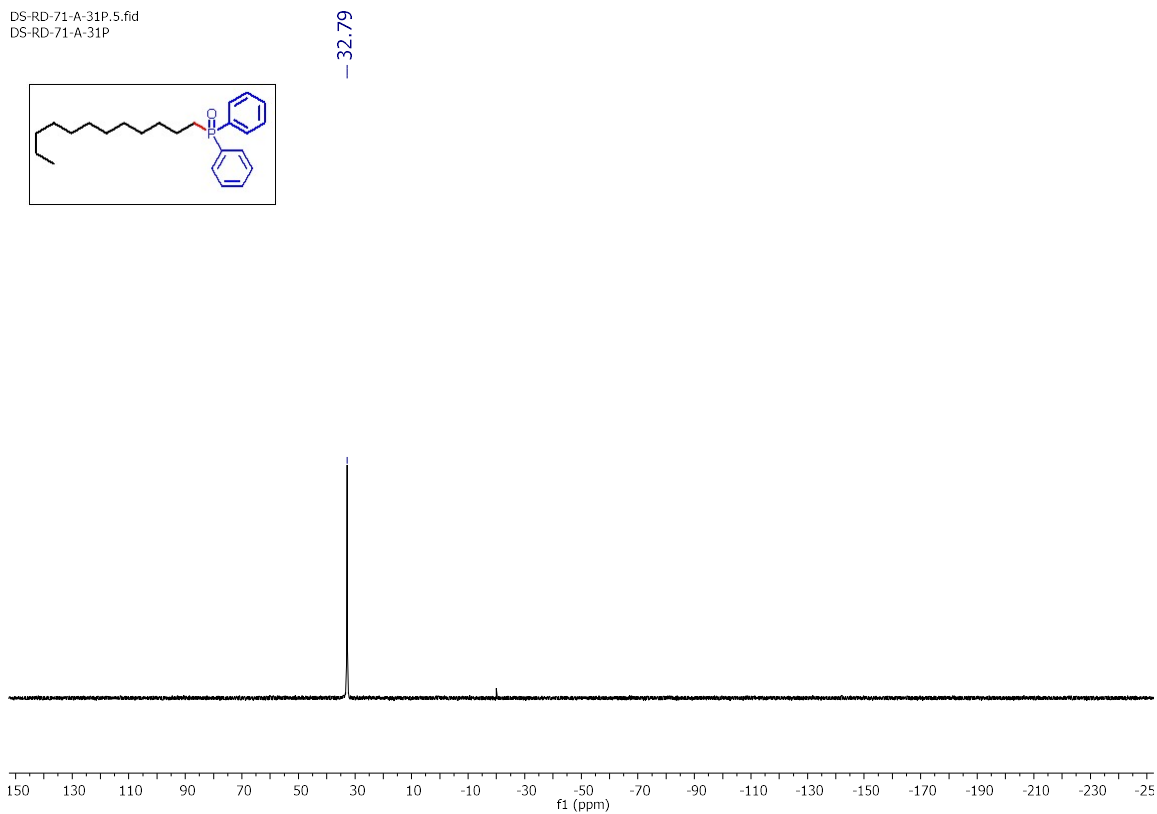

Figure S33.  $^1\text{H}$  NMR (500 MHz),  $^{13}\text{C}\{^1\text{H}\}$  NMR (125 MHz), and  $^{31}\text{P}\{^1\text{H}\}$  NMR (200 MHz) spectrum of Compound 3ag in  $\text{CDCl}_3$

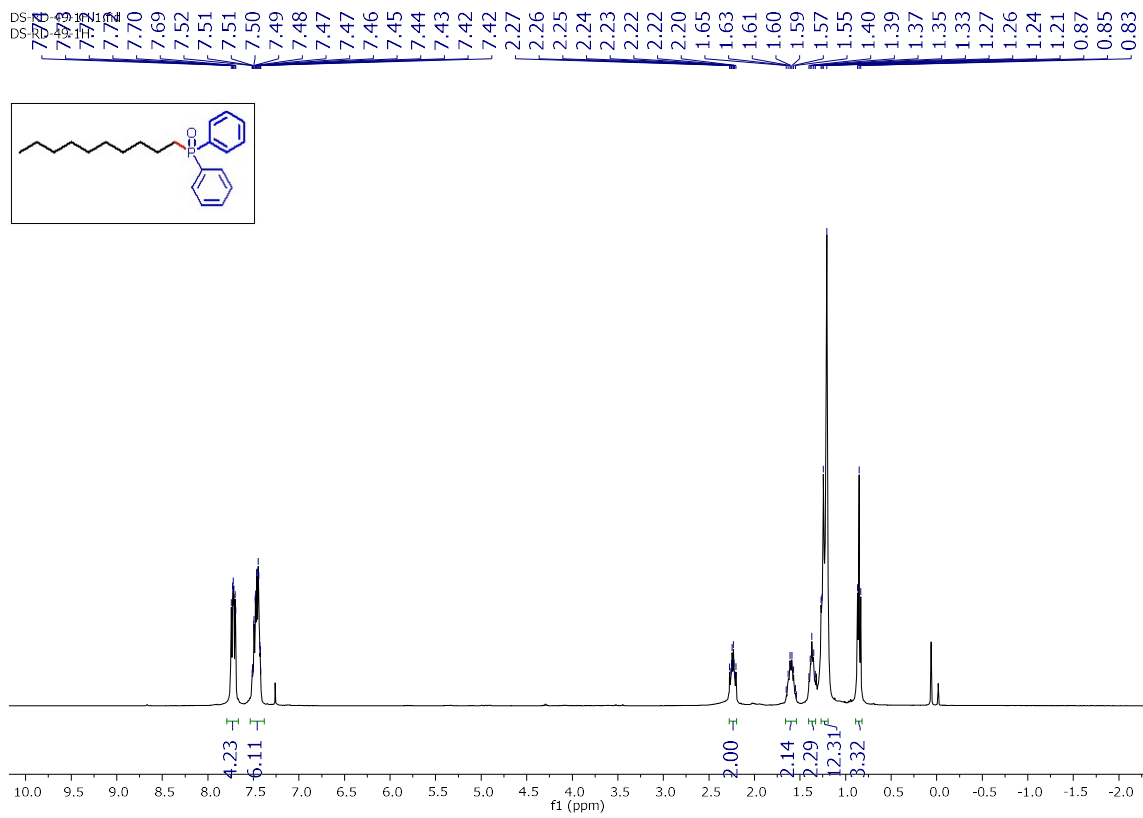

DS-RD-49-13C.3.fid  
DS-RD-49-13C

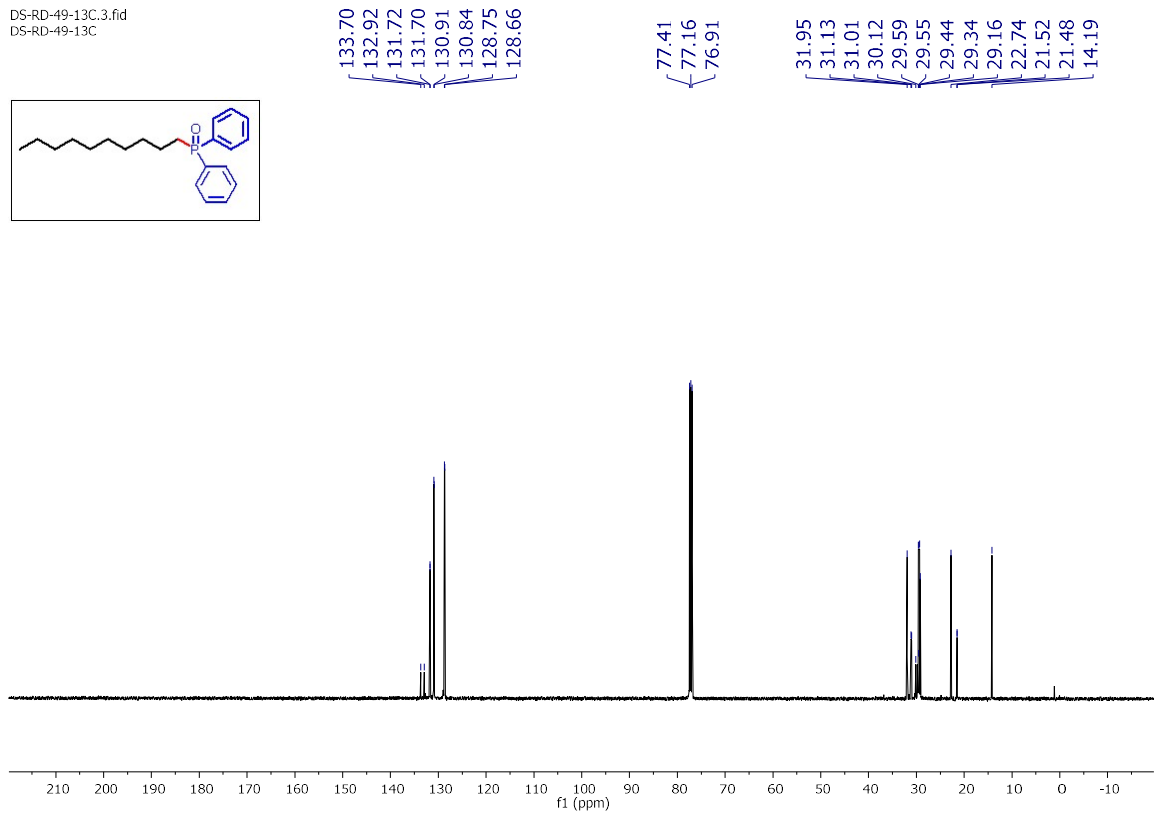

DS-RD-49-P31.5.fid  
DS-RD-49-P31

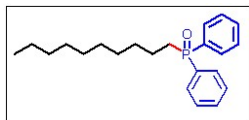

-32.66

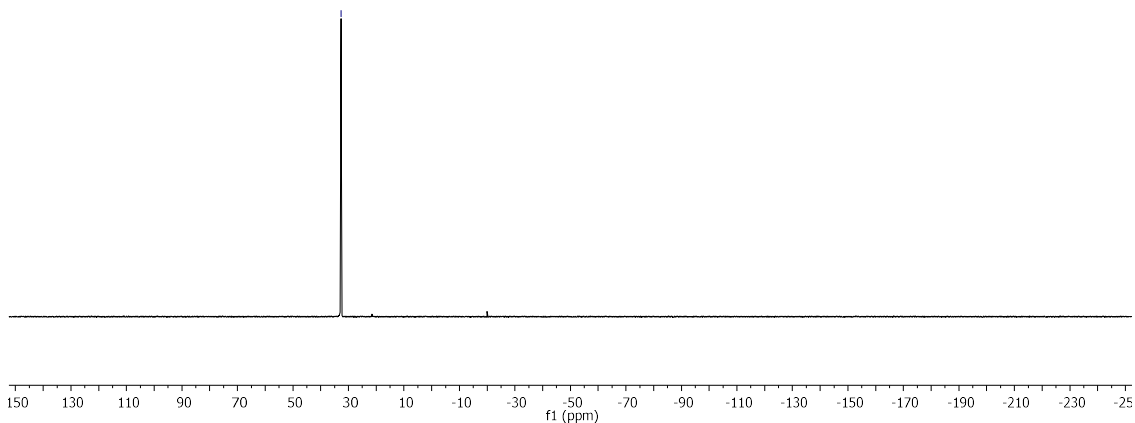

Figure S34.  $^1\text{H}$  NMR (500 MHz),  $^{13}\text{C}\{^1\text{H}\}$  NMR (125 MHz), and  $^{31}\text{P}\{^1\text{H}\}$  NMR (200 MHz) spectrum of Compound 3ah in  $\text{CDCl}_3$

DS-RD-111-B-1H.1  
DS-RD-111-B-1H

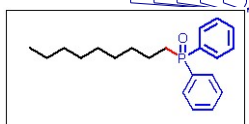

7.73  
7.73  
7.72  
7.70  
7.52  
7.50  
7.49  
7.47  
7.45  
7.44

2.27  
2.26  
2.25  
2.24  
2.22

1.63  
1.61  
1.59  
1.58  
1.39  
1.37  
1.36  
1.27  
1.26  
1.25  
1.21  
0.86  
0.85  
0.84

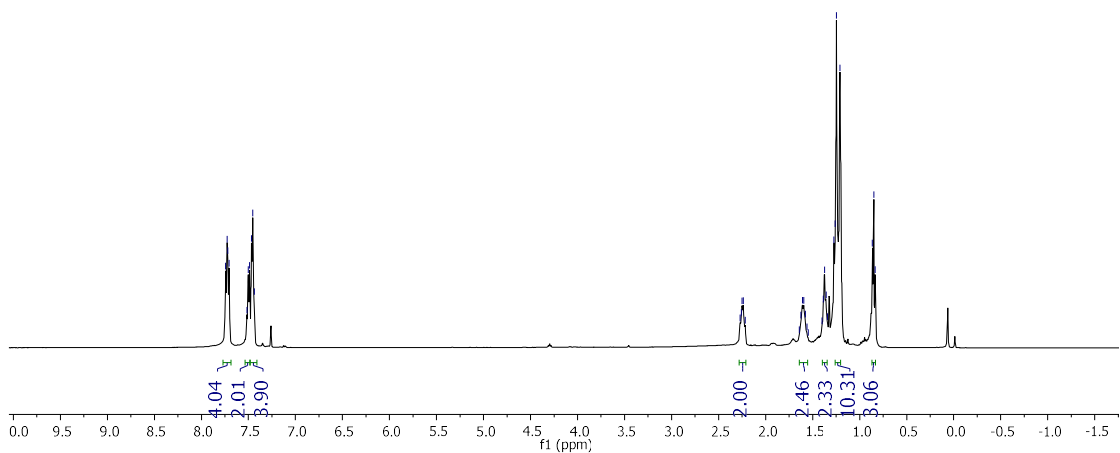

DS-HP-781-CR-13C.3.fid  
DS-HP-781-CR-13C

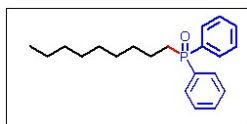

133.62  
132.84  
131.77  
131.75  
130.93  
130.86  
128.78  
128.69

77.41  
77.16  
76.91

31.93  
31.16  
31.04  
30.11  
29.54  
29.43  
29.32  
29.19  
22.75  
21.53  
21.49  
14.21

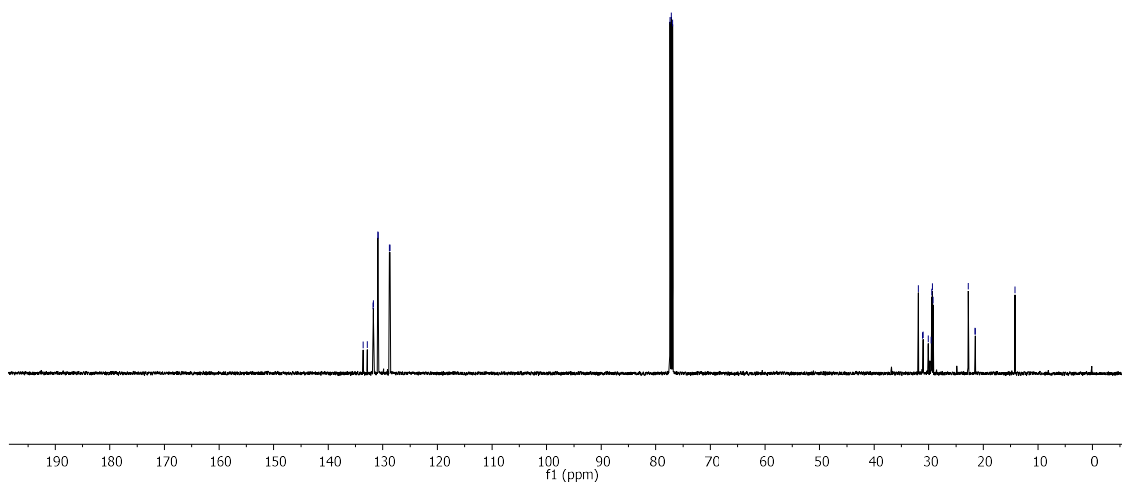

DS-HP-781-CR-31P.5.fid  
DS-HP-781-CR-31P

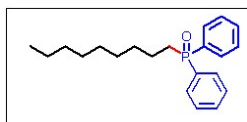

-32.87

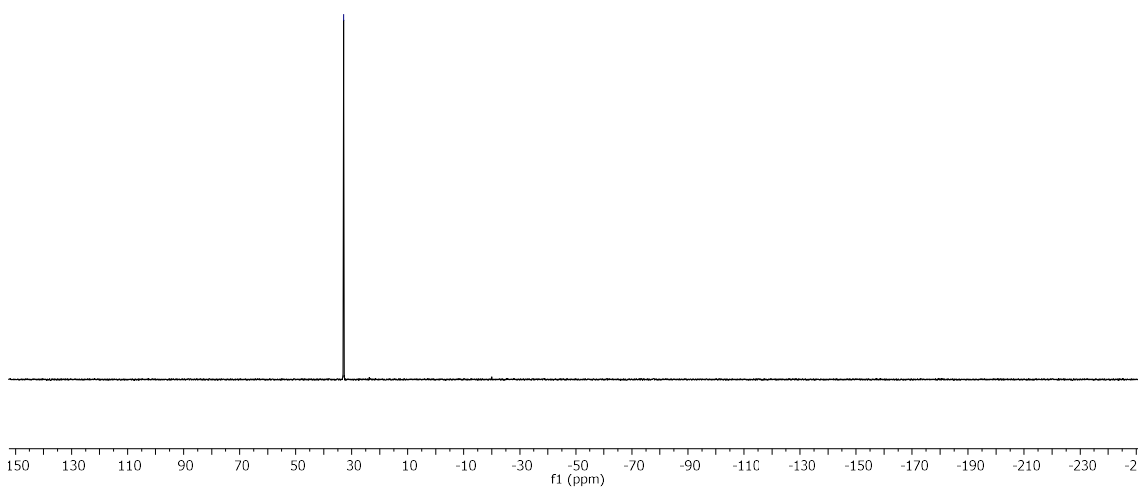

Figure S35.  $^1\text{H}$  NMR (500 MHz),  $^{13}\text{C}\{^1\text{H}\}$  NMR (125 MHz), and  $^{31}\text{P}\{^1\text{H}\}$  NMR (200 MHz) spectrum of Compound 3ai in  $\text{CDCl}_3$

DS-HP-780-B-1H.1.fid  
DS-HP-780-B-1H

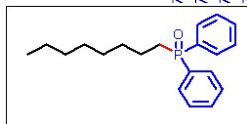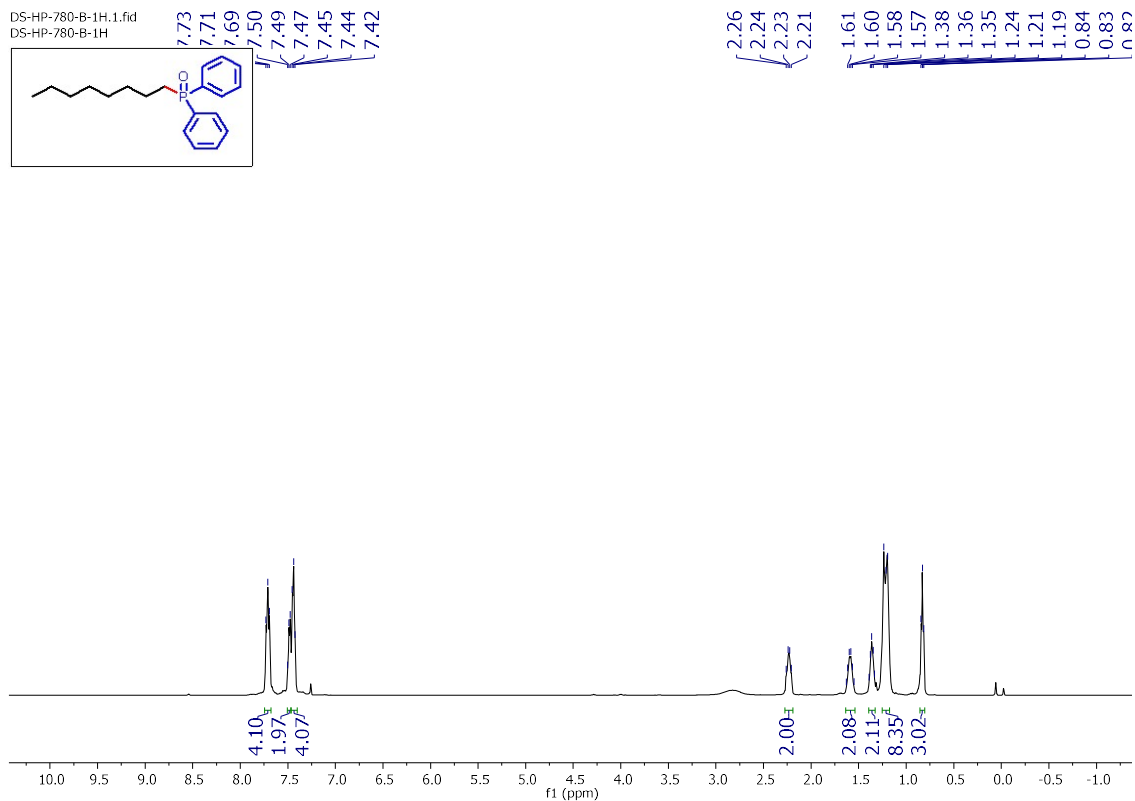

DS-HP-780-B-13C.3.fid  
DS-HP-780-B-13C

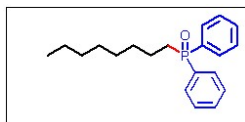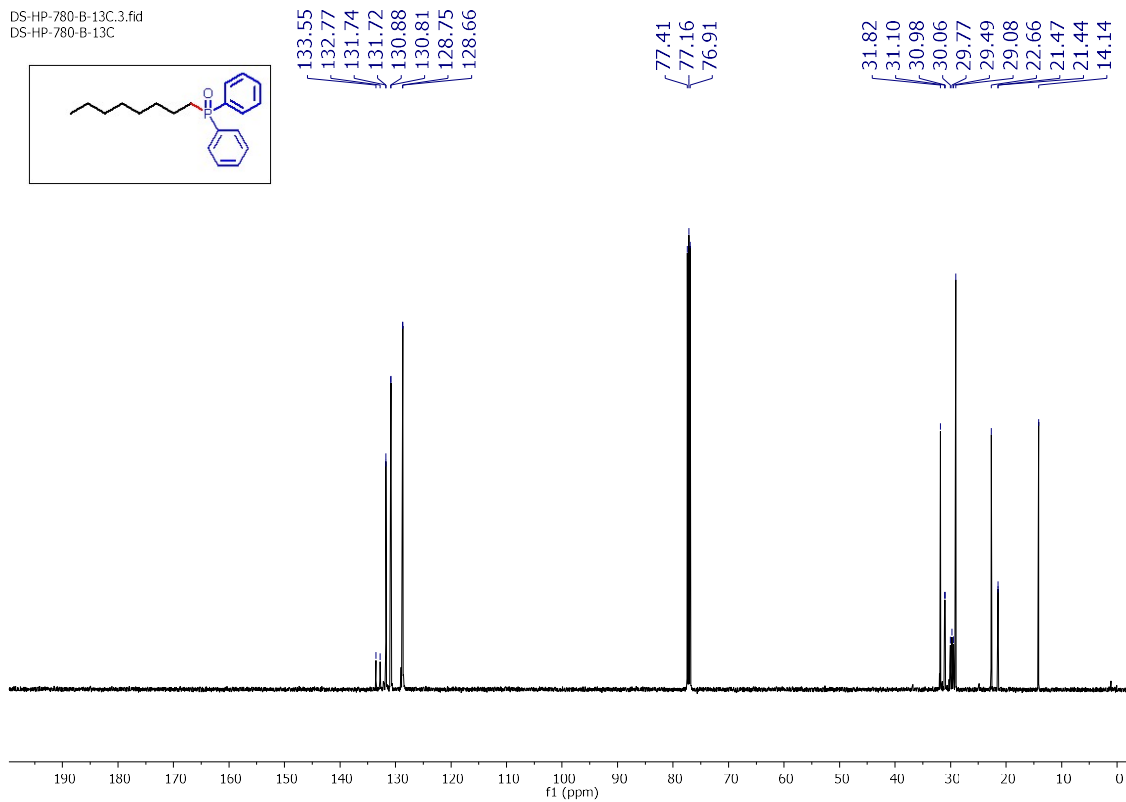

DS-HP-108-B-31P.5.fid  
DS-HP-108-B-31P

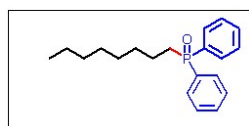

-32.76

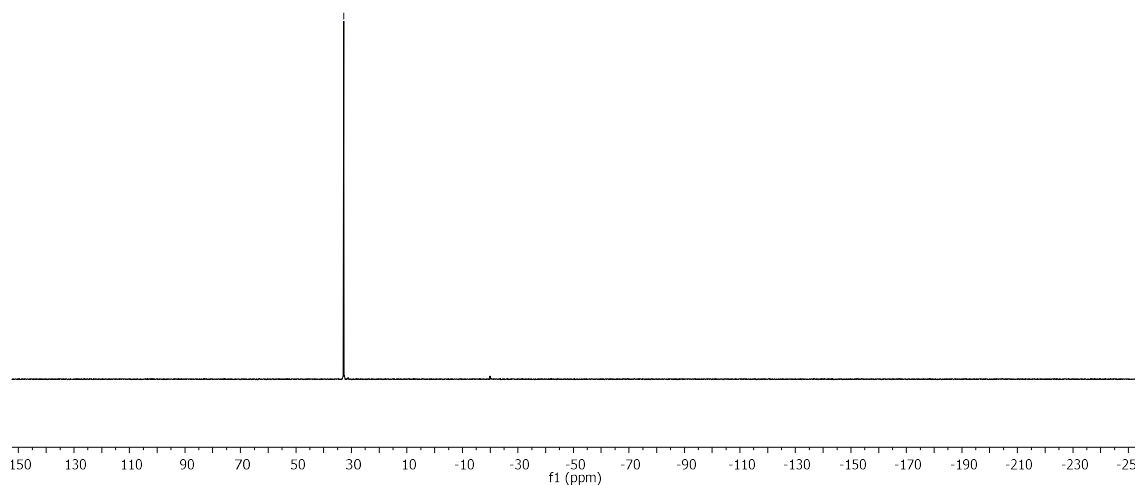

Figure S36.  $^1\text{H}$  NMR (500 MHz),  $^{13}\text{C}\{^1\text{H}\}$  NMR (125 MHz), and  $^{31}\text{P}\{^1\text{H}\}$  NMR (200 MHz) spectrum of Compound 3aj in  $\text{CDCl}_3$

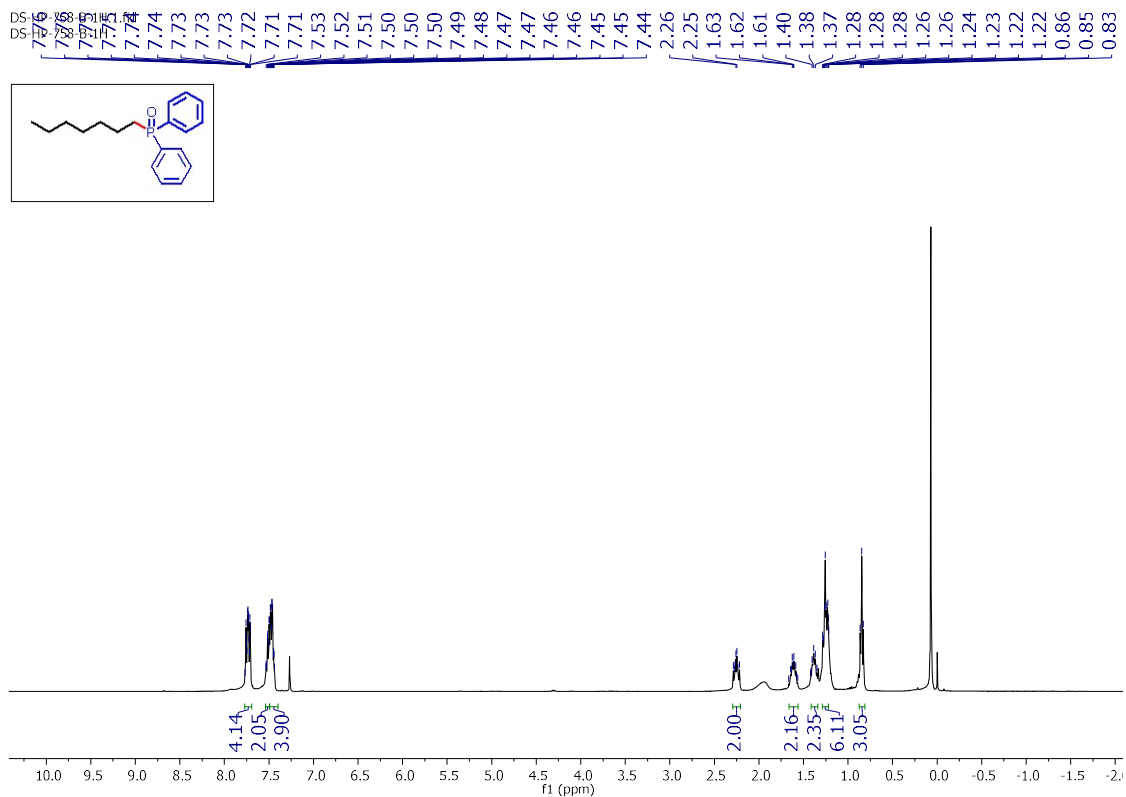

DS-HP-758B-13C.5.fid  
DS-HP-758B-13C

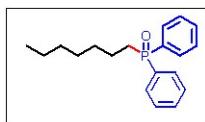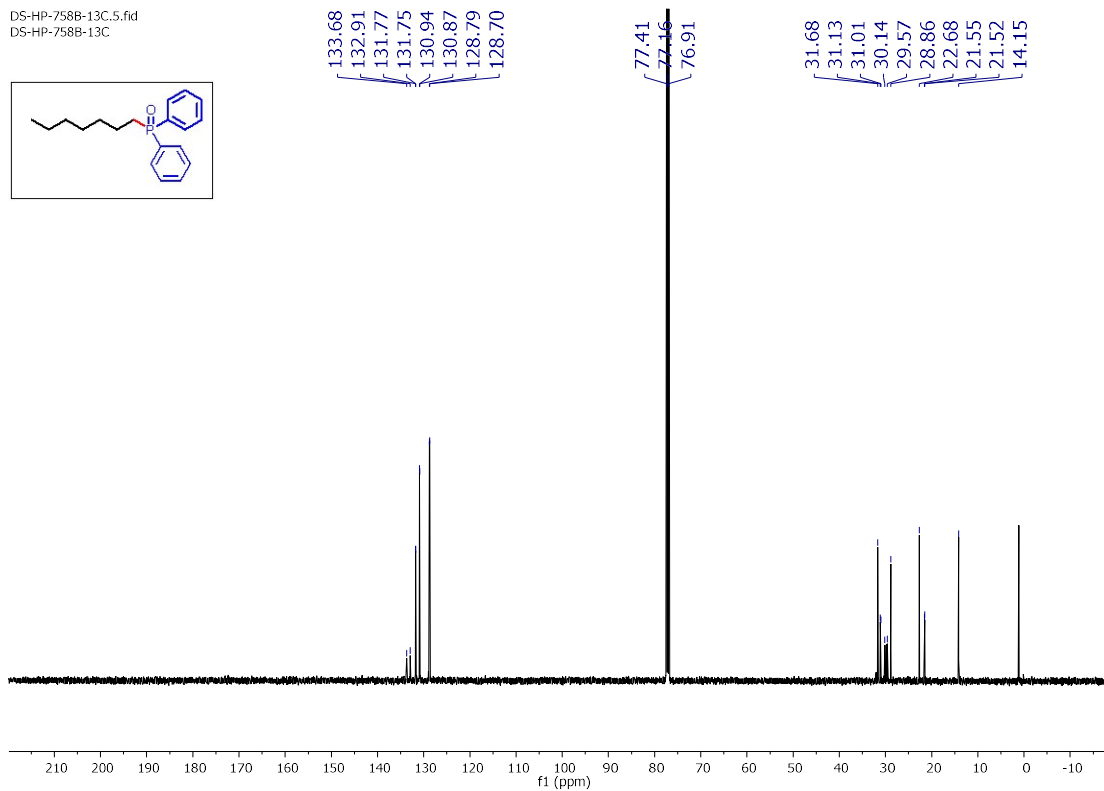

DS-HP-758B-31P.3.fid  
DS-HP-758B-31P

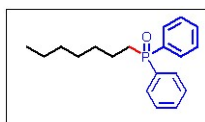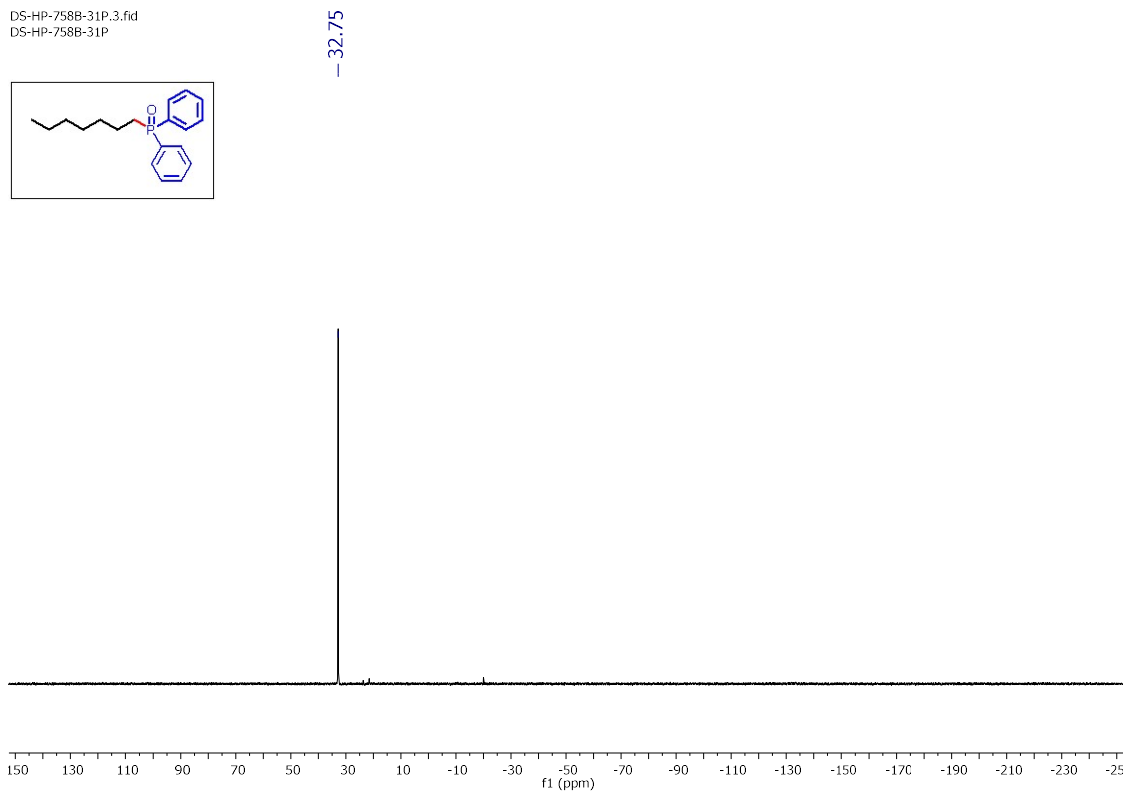

Figure S37.  $^1\text{H}$  NMR (500 MHz),  $^{13}\text{C}\{^1\text{H}\}$  NMR (125 MHz), and  $^{31}\text{P}\{^1\text{H}\}$  NMR (200 MHz) spectrum of Compound 3ak in  $\text{CDCl}_3$

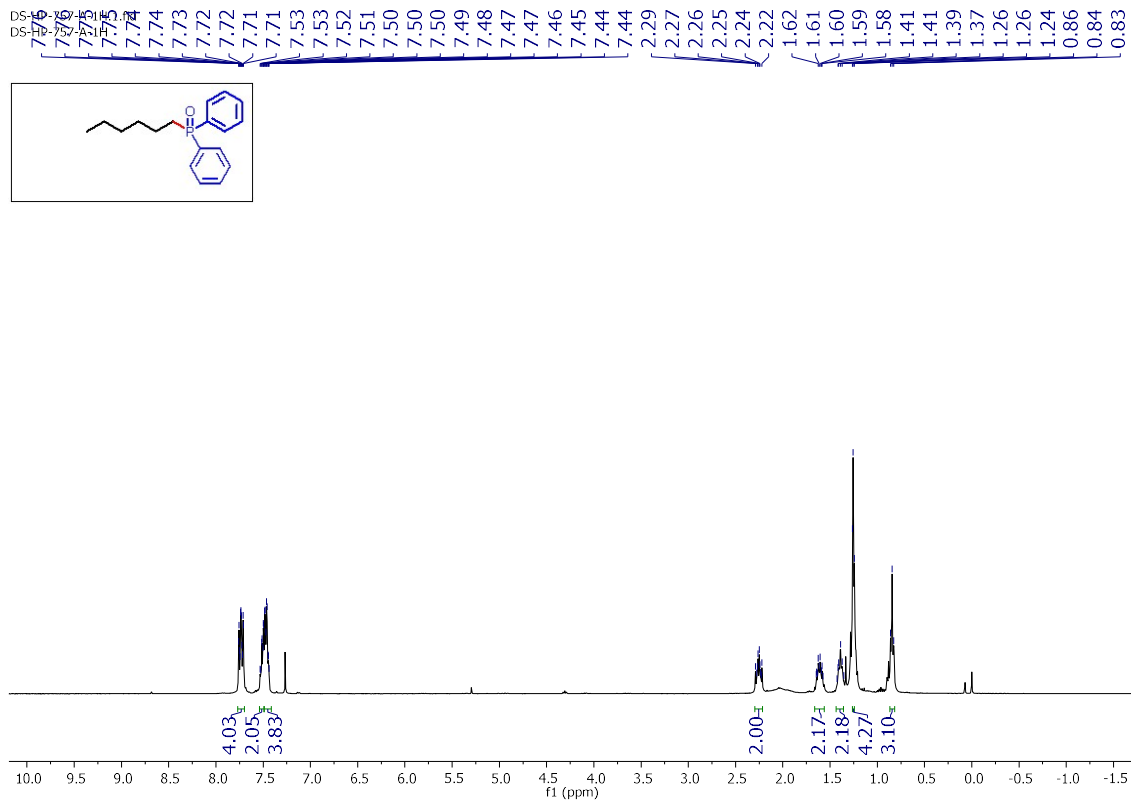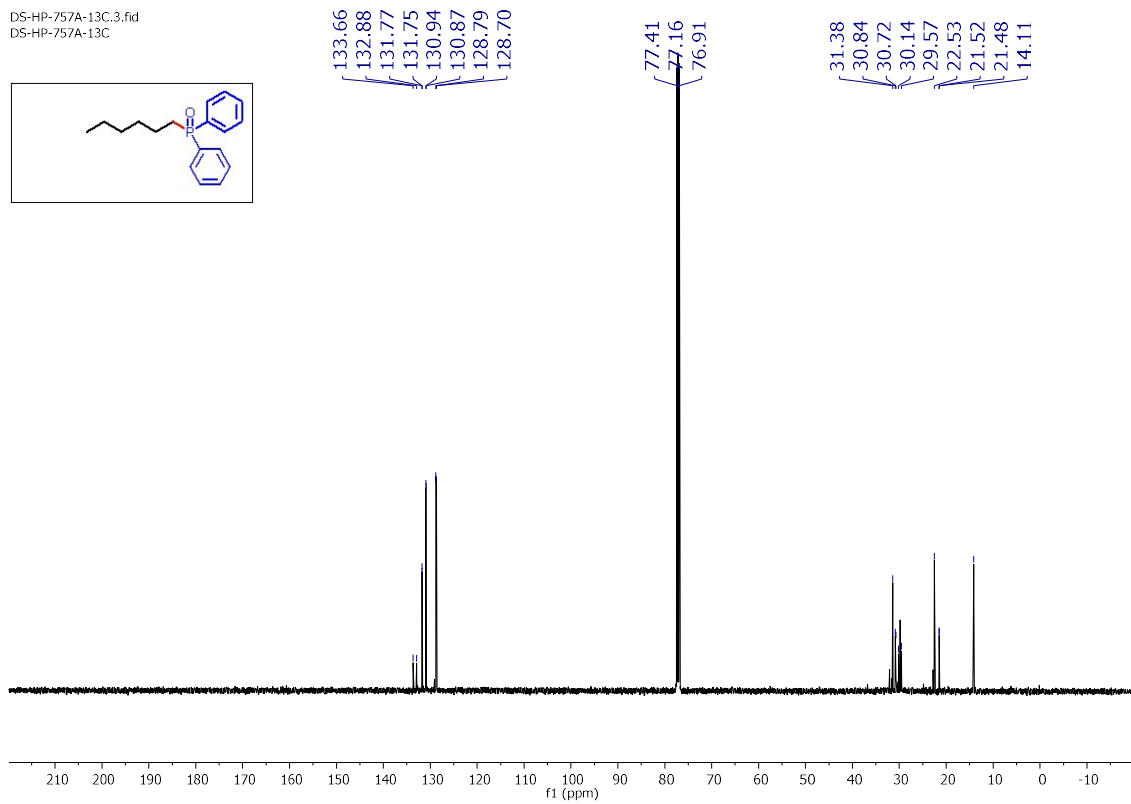

DS-HP-773-BP-31P.1.fid  
DS-HP-773-BP-31P

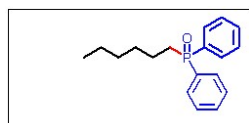

-32.75

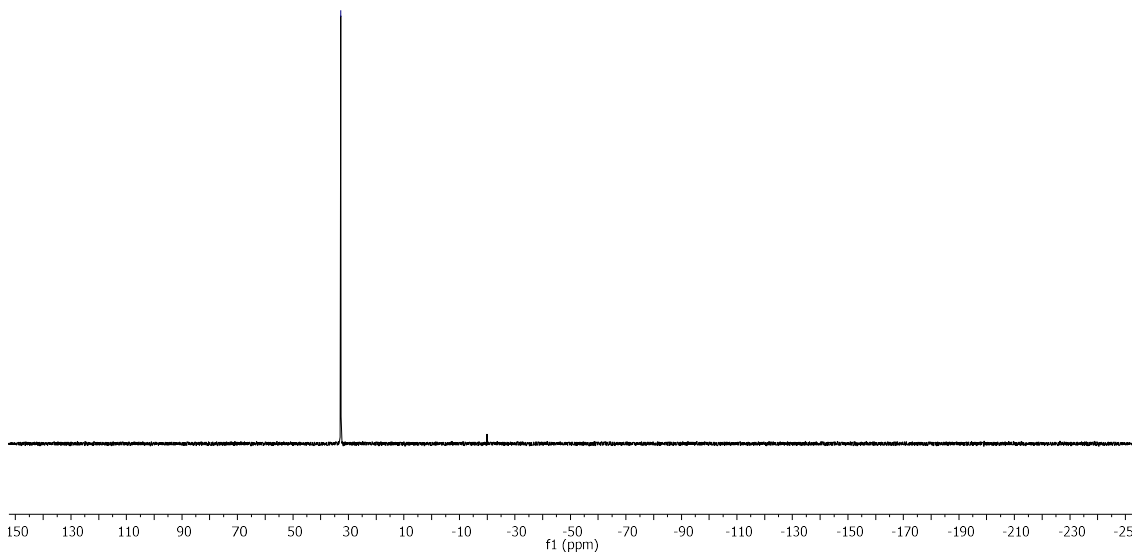

Figure S38.  $^1\text{H}$  NMR (500 MHz),  $^{13}\text{C}\{^1\text{H}\}$  NMR (125 MHz), and  $^{31}\text{P}\{^1\text{H}\}$  NMR (200 MHz) spectrum of Compound 3al in  $\text{CDCl}_3$

DS-HP-105-BP-1H.1.fic  
DS-HP-105-BP-1H

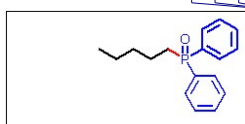

7.74  
7.72  
7.70  
7.52  
7.50  
7.49  
7.47  
7.45  
7.44

2.27  
2.25  
2.24  
2.23  
2.22  
1.65  
1.63  
1.62  
1.60  
1.59  
1.40  
1.38  
1.37  
1.35  
1.27  
1.25  
0.84  
0.82

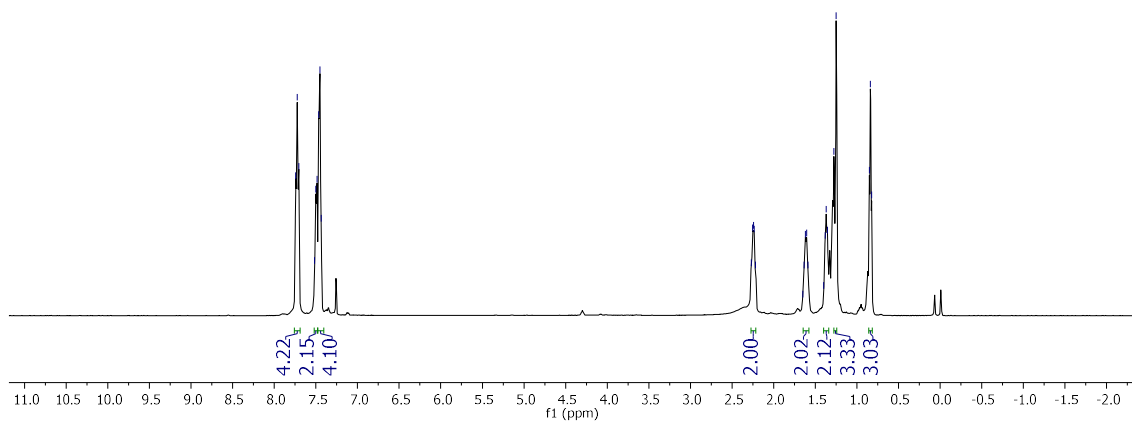

DS-HP-105-BP-13C.3.fid  
DS-HP-105-BP-13C

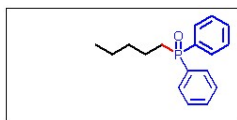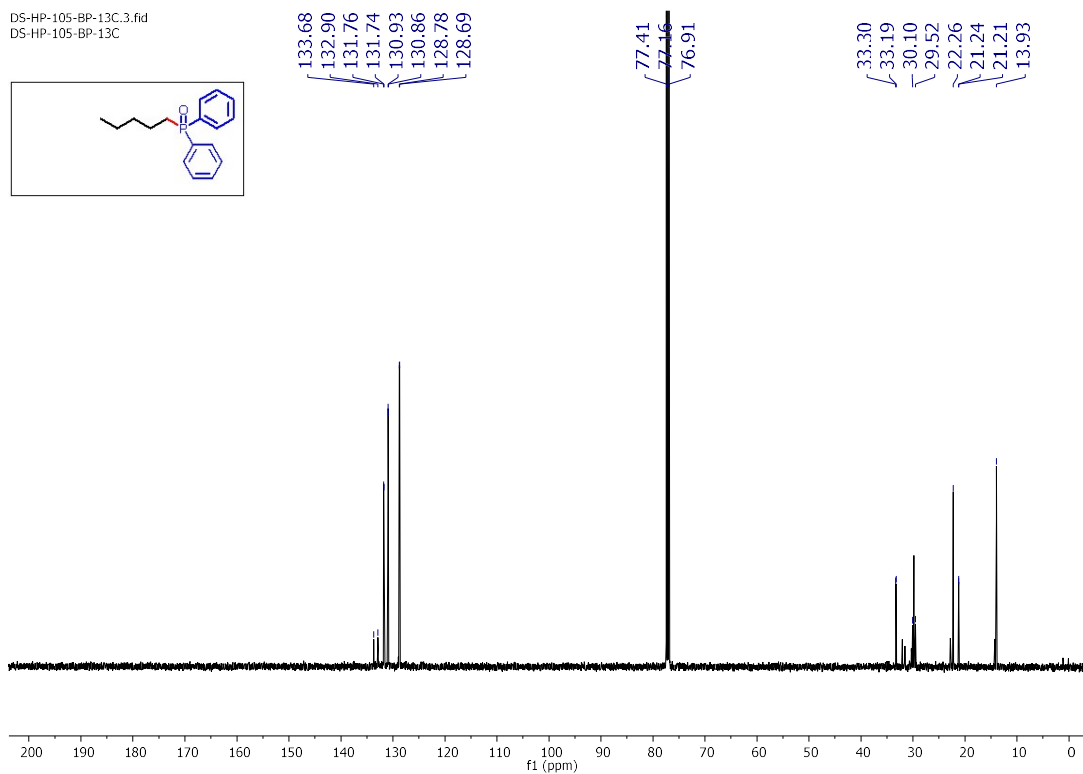

DS-RD-105-B-31P.5.fid  
DS-RD-105-B-31P

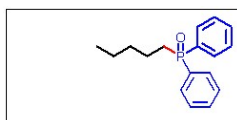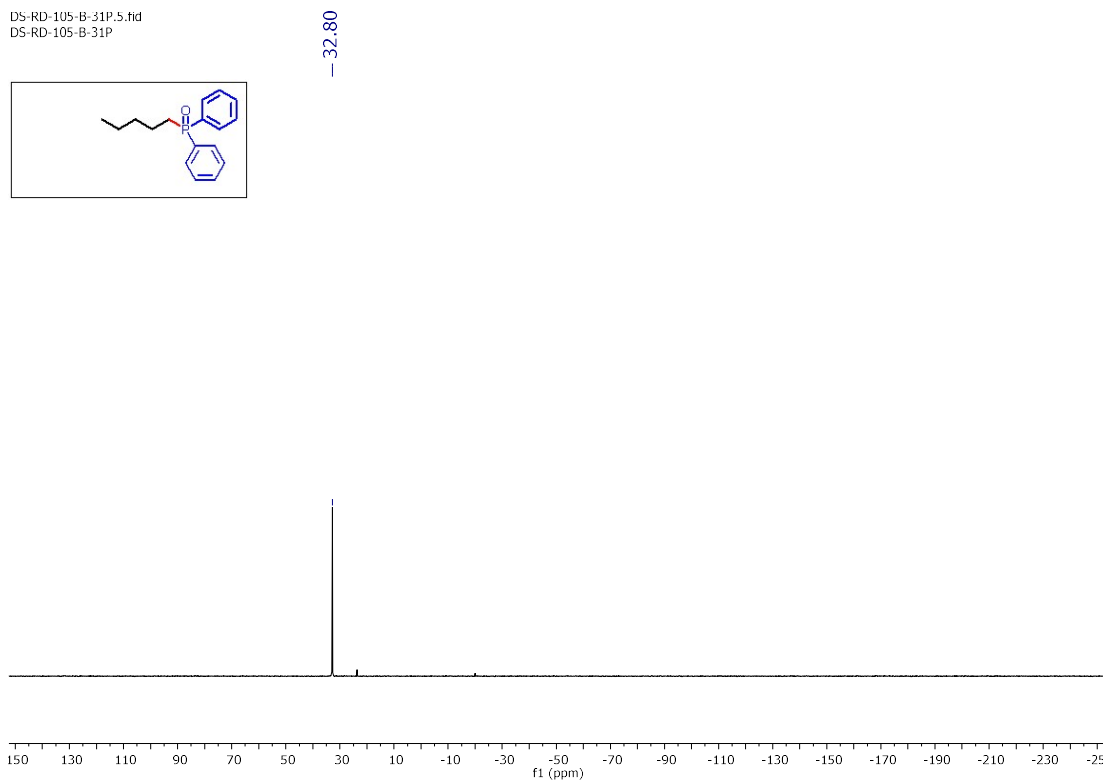

Figure S39.  $^1\text{H}$  NMR (500 MHz),  $^{13}\text{C}\{^1\text{H}\}$  NMR (125 MHz), and  $^{31}\text{P}\{^1\text{H}\}$  NMR (200 MHz) spectrum of Compound 3am in  $\text{CDCl}_3$

D5-HP-BUT-B-1H.1.fid  
D5-HP-BUT-B-1H

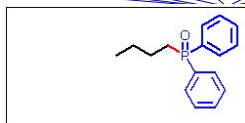

7.75  
7.73  
7.71  
7.53  
7.51  
7.50  
7.48  
7.46  
7.45

2.29  
2.27  
2.25  
2.23  
1.63  
1.62  
1.60  
1.59  
1.57  
1.44  
1.42  
1.41  
1.39  
0.90  
0.89  
0.87

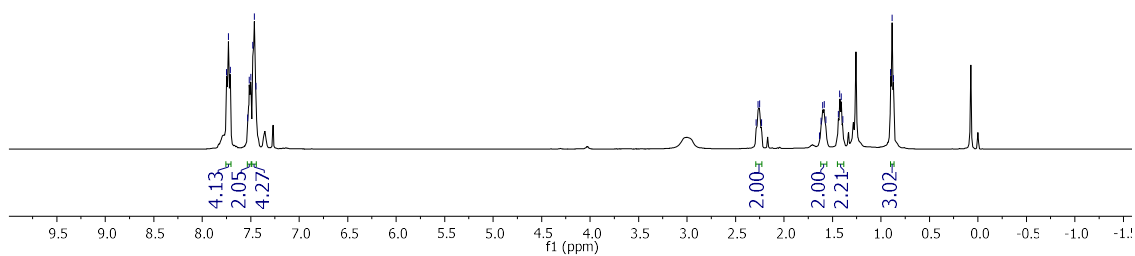

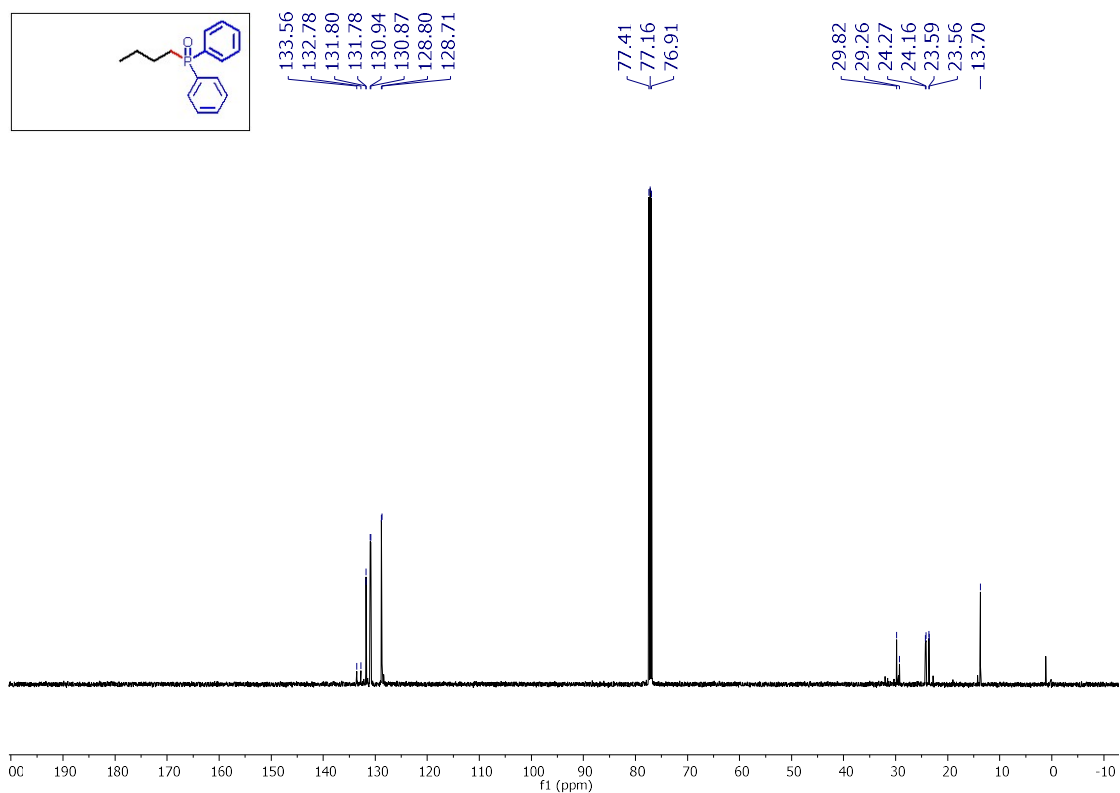

DS-HP-BUT-B-31P.5.tid  
DS-HP-BUT-B-31P

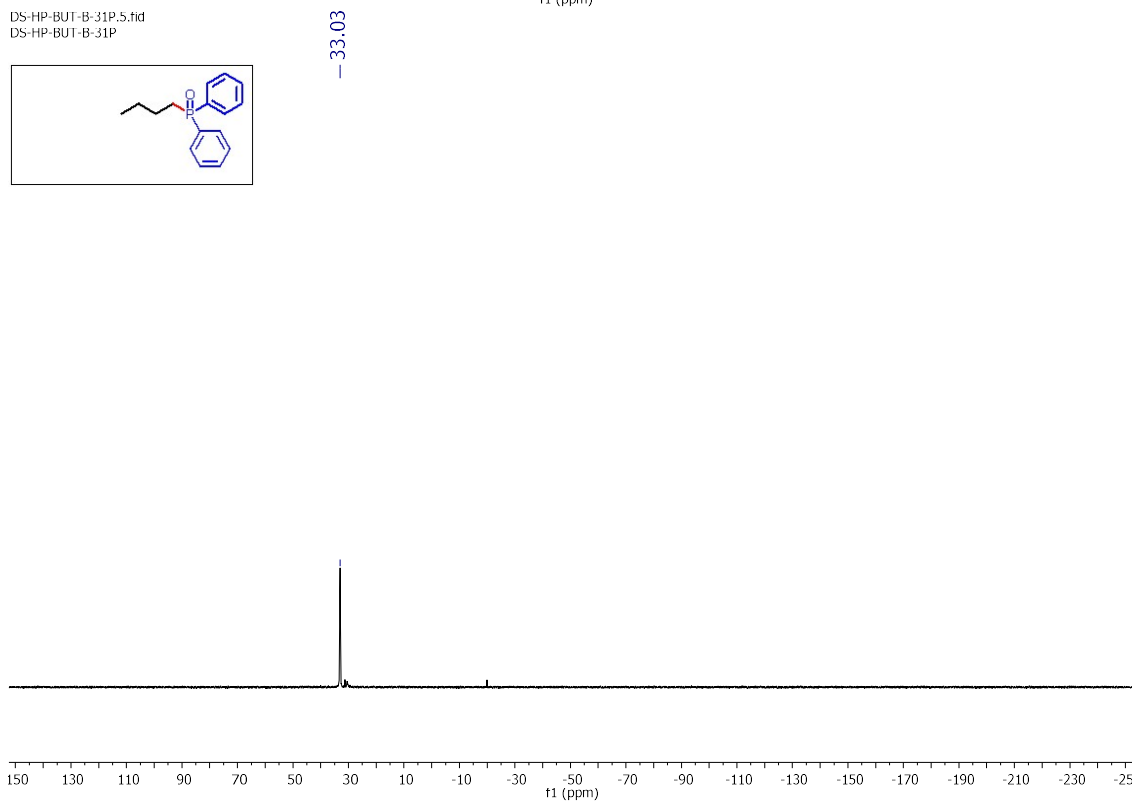

Figure S40.  $^1\text{H}$  NMR (500 MHz),  $^{13}\text{C}\{^1\text{H}\}$  NMR (125 MHz), and  $^{31}\text{P}\{^1\text{H}\}$  NMR (200 MHz) spectrum of Compound 3an in  $\text{CDCl}_3$

DS-HP-4BR-PHEN-ET-1H.1.fid  
DS-HP-4BR-PHEN-ET-1H

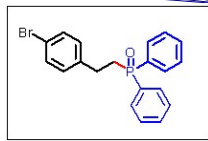

7.76  
7.74  
7.72  
7.53  
7.52  
7.49  
7.47  
7.36  
7.34  
7.03  
7.01

2.90  
2.88  
2.87  
2.56  
2.55  
2.53

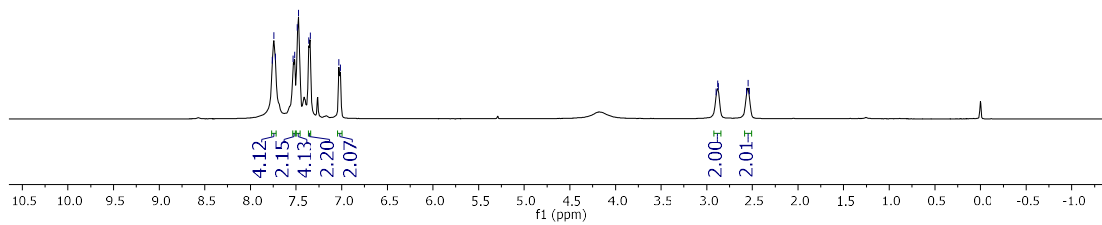

DS-HP-4BR-PHEN-ET-13C.3.fid  
DS-HP-4BR-PHEN-ET-13C

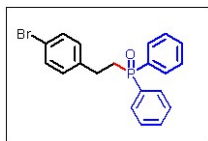

140.23  
140.11  
132.73  
132.04  
131.75  
130.93  
130.87  
130.01  
128.95  
128.86  
120.25

77.42  
77.46  
76.91

32.11  
31.56  
27.17

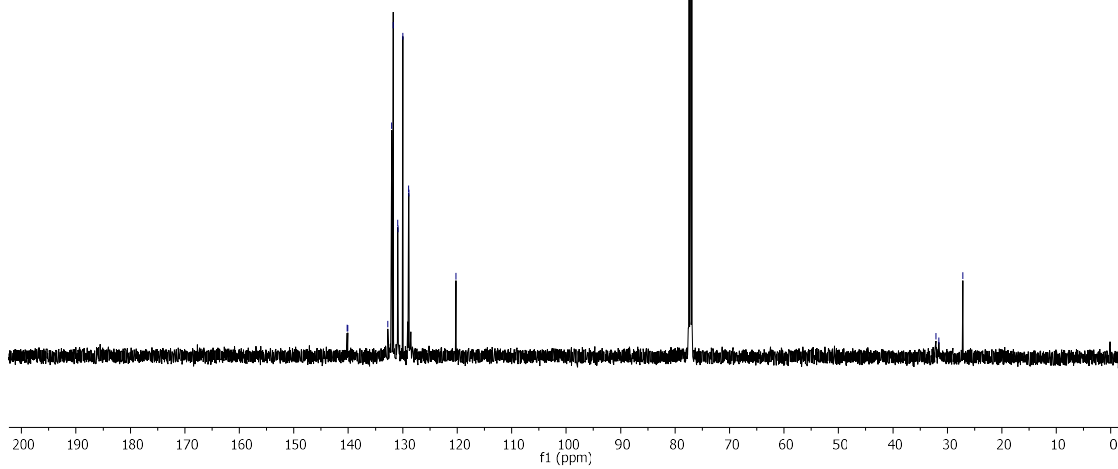

DS-HP-4BR-PHEN-ET-31P.5.fid  
DS-HP-4BR-PHEN-ET-31P

-31.59

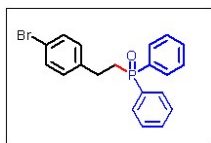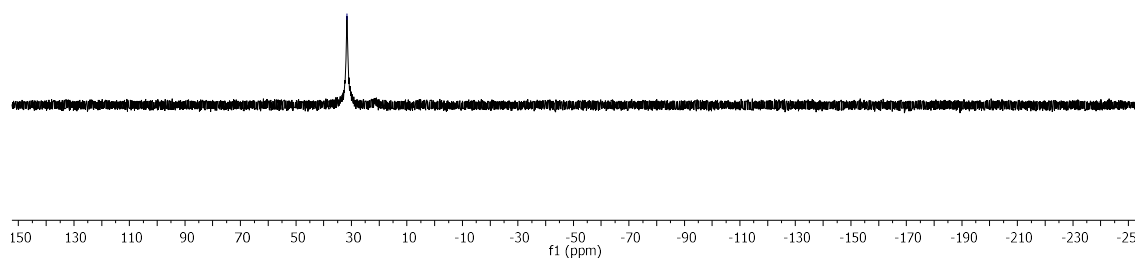

Figure S41.  $^1\text{H}$  NMR (500 MHz),  $^{13}\text{C}\{^1\text{H}\}$  NMR (125 MHz), and  $^{31}\text{P}\{^1\text{H}\}$  NMR (200 MHz) spectrum of Compound 3ao in  $\text{CDCl}_3$

DS-HP-790-B-1H.5.fid  
DS-HP-790-B-1H

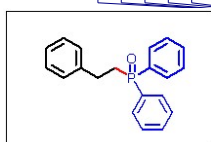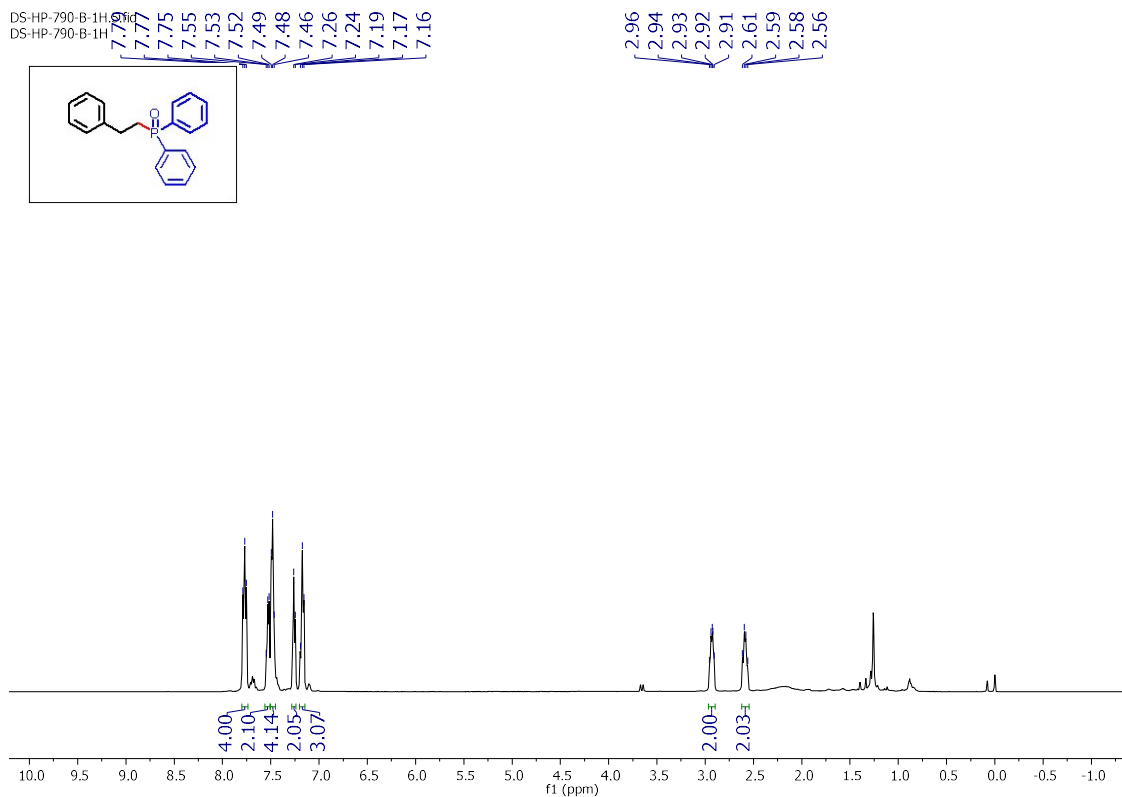

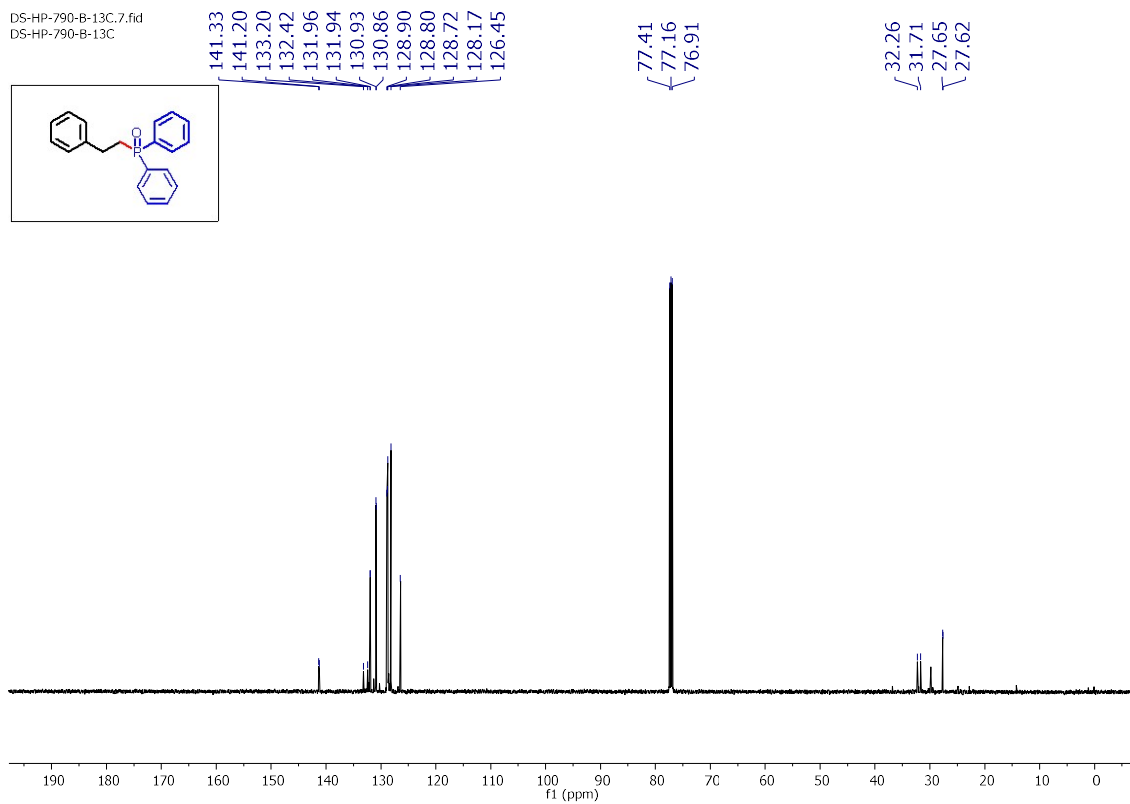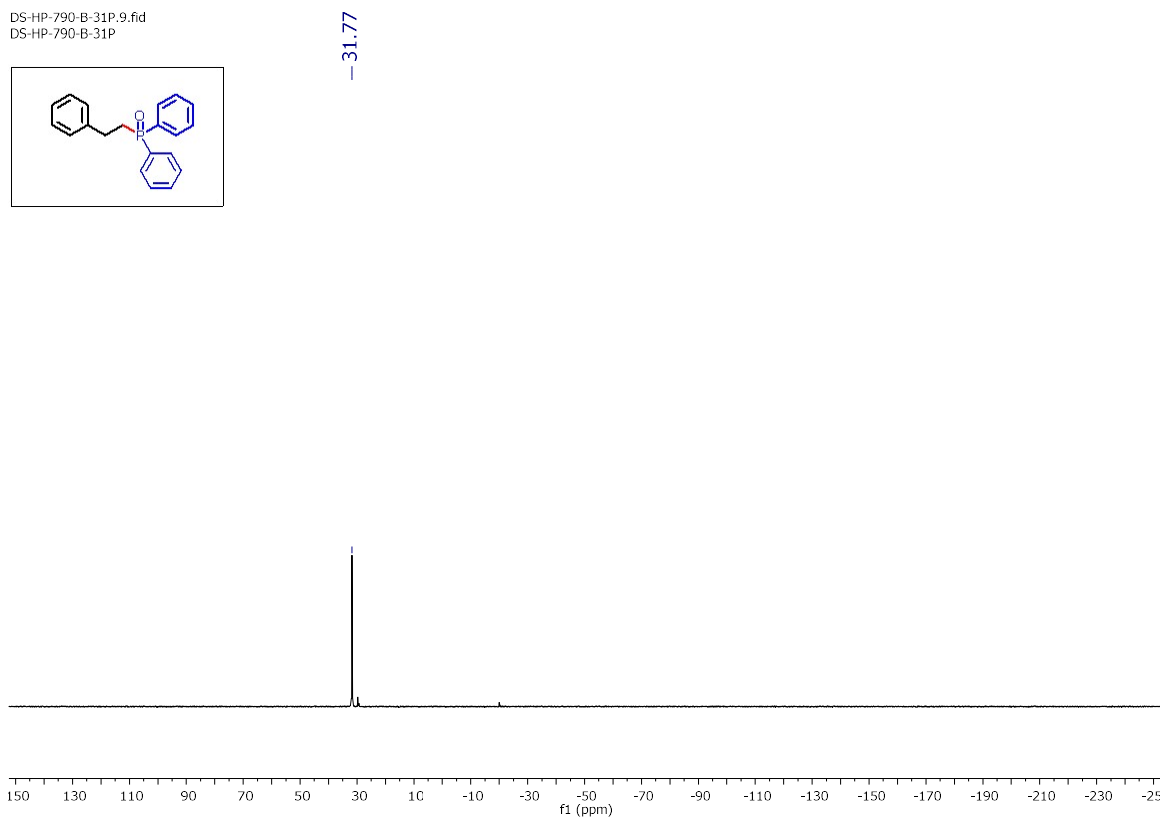

Figure S42.  $^1\text{H}$  NMR (500 MHz),  $^{13}\text{C}\{^1\text{H}\}$  NMR (125 MHz), and  $^{31}\text{P}\{^1\text{H}\}$  NMR (200 MHz) spectrum of Compound 3ap in  $\text{CDCl}_3$



DS-HP-984-A-31P.5.fid  
DS-HP-984-A-31F

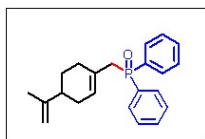

-29.75

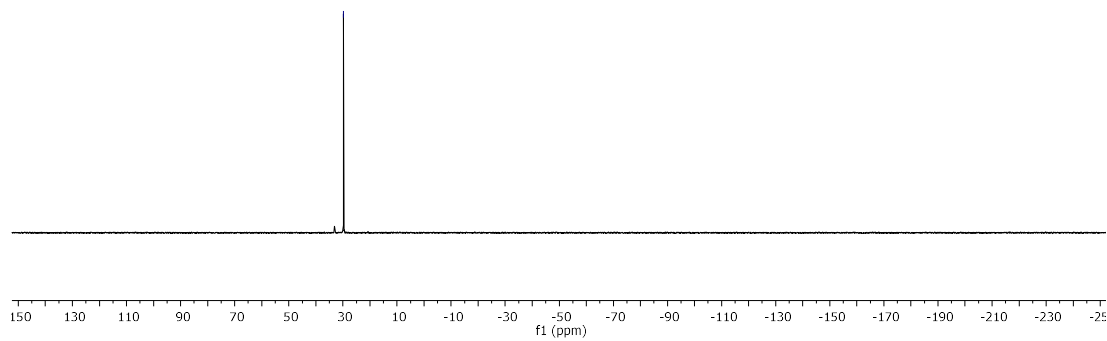

Figure S43. <sup>1</sup>H NMR (500 MHz), <sup>13</sup>C {<sup>1</sup>H} NMR (125 MHz), and <sup>31</sup>P {<sup>1</sup>H} NMR (200 MHz) spectrum of Compound 3aq in CDCl<sub>3</sub>

D5-HP-834B-13C.3.fic  
 D5-HP-834B-13C

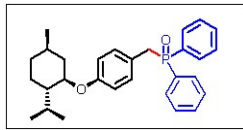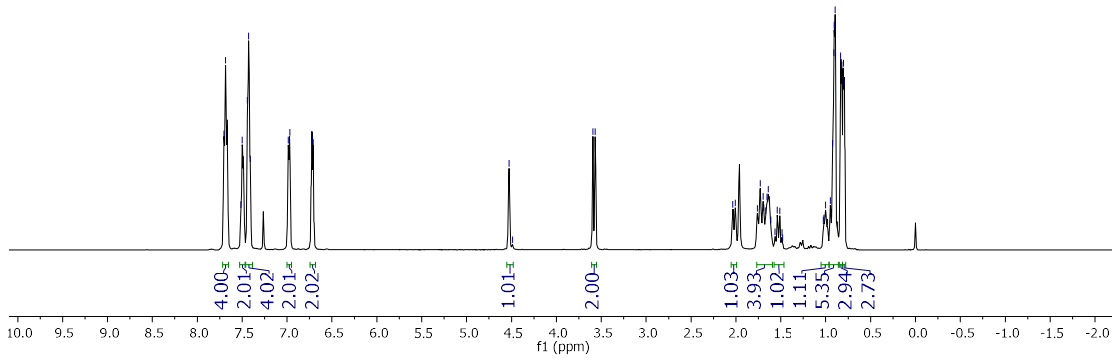

D5-HP-834B-13C.3.fic  
 D5-HP-834B-13C

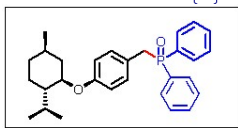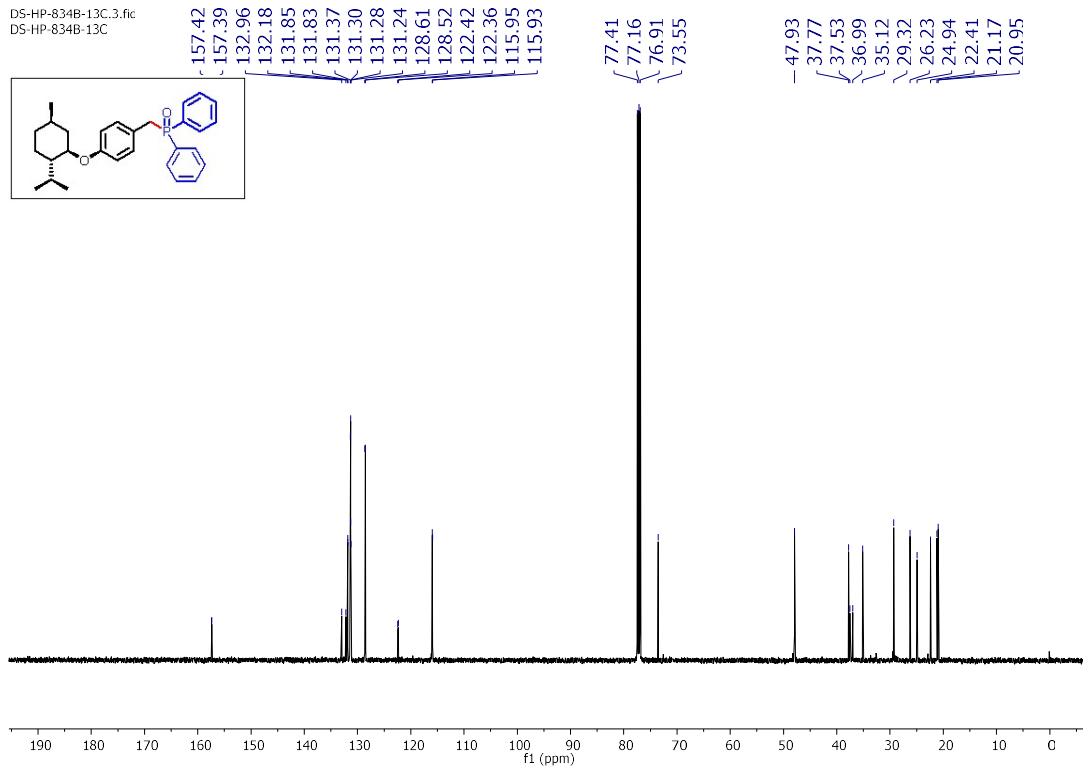



DS-HP-CITRA-B-13C.3.fid  
DS-HP-CITRA-B-13C

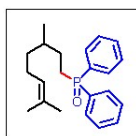

133.63  
133.57  
132.85  
132.79  
131.74  
131.71  
130.90  
130.89  
130.83  
130.82  
128.75  
128.66  
124.58  
77.41  
77.16  
76.91  
36.41  
33.49  
33.38  
29.77  
28.12  
28.09  
27.58  
27.01  
25.78  
25.46  
19.12  
17.72

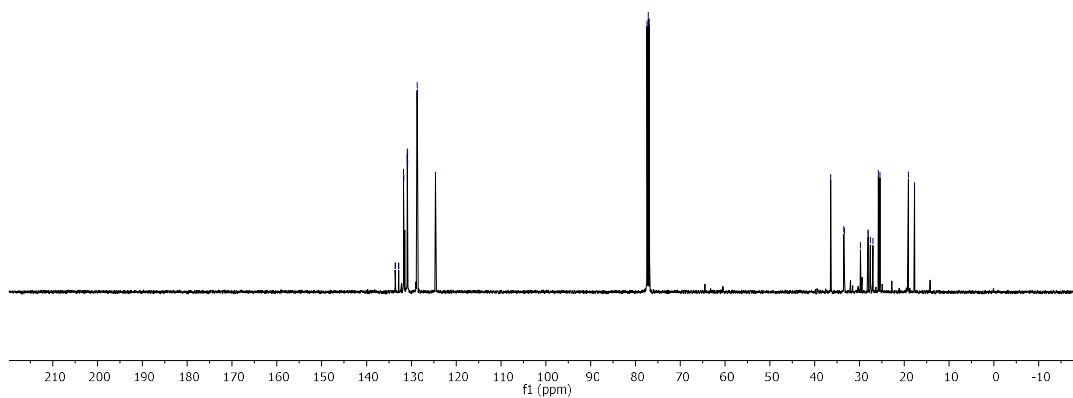

DS-HP-CITRA-B-31P.5.fid  
DS-HP-CITRA-B-31P

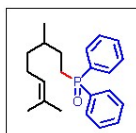

33.20

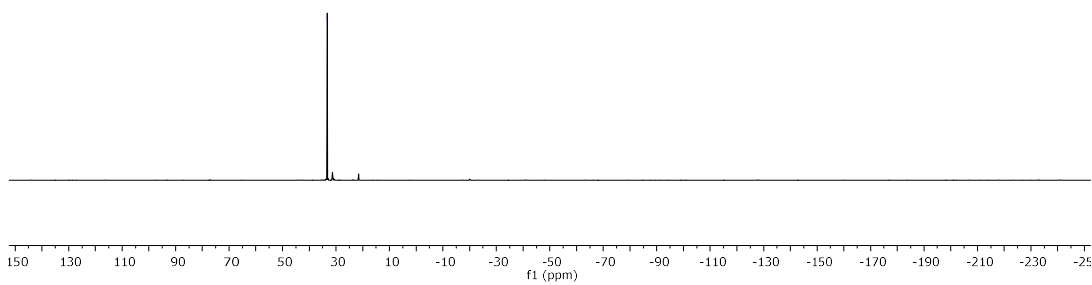

Figure S45.  $^1\text{H}$  NMR (500 MHz),  $^{13}\text{C}\{^1\text{H}\}$  NMR (125 MHz), and  $^{31}\text{P}\{^1\text{H}\}$  NMR (200 MHz) spectrum of Compound 3as in  $\text{CDCl}_3$

DS-HP-990-1H.1  
1H

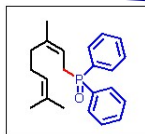

7.78  
7.71  
7.71  
7.69  
7.49  
7.48  
7.47  
7.44  
7.43  
7.42  
7.41  
5.23  
5.22  
5.21  
5.20  
4.97  
4.94  
3.08  
3.07  
3.06  
3.04  
1.94  
1.93  
1.93  
1.60  
1.52  
1.41  
1.41

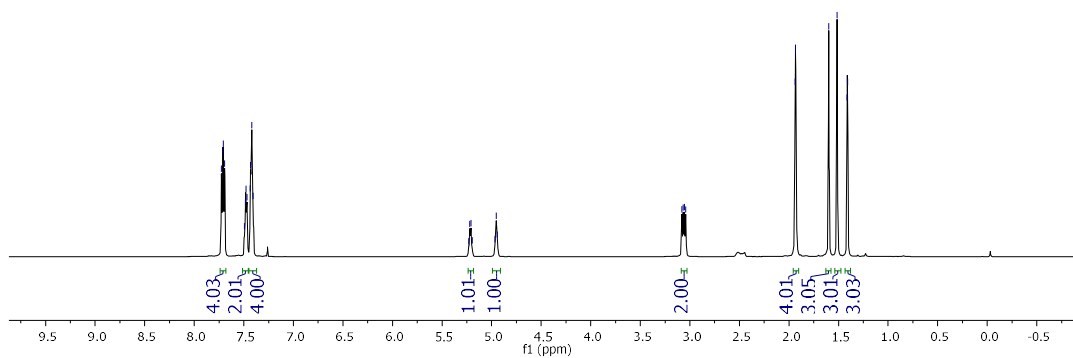

DS-HP-990-13C.3.fid  
13C

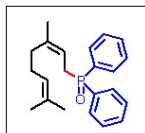

141.16  
141.08  
133.24  
132.59  
131.73  
131.71  
131.61  
131.15  
131.09  
128.53  
128.45  
123.92  
112.38  
112.33  
77.37  
77.16  
76.95  
39.80  
39.79  
31.11  
30.65  
26.46  
26.44  
25.70  
17.70  
16.39  
16.38

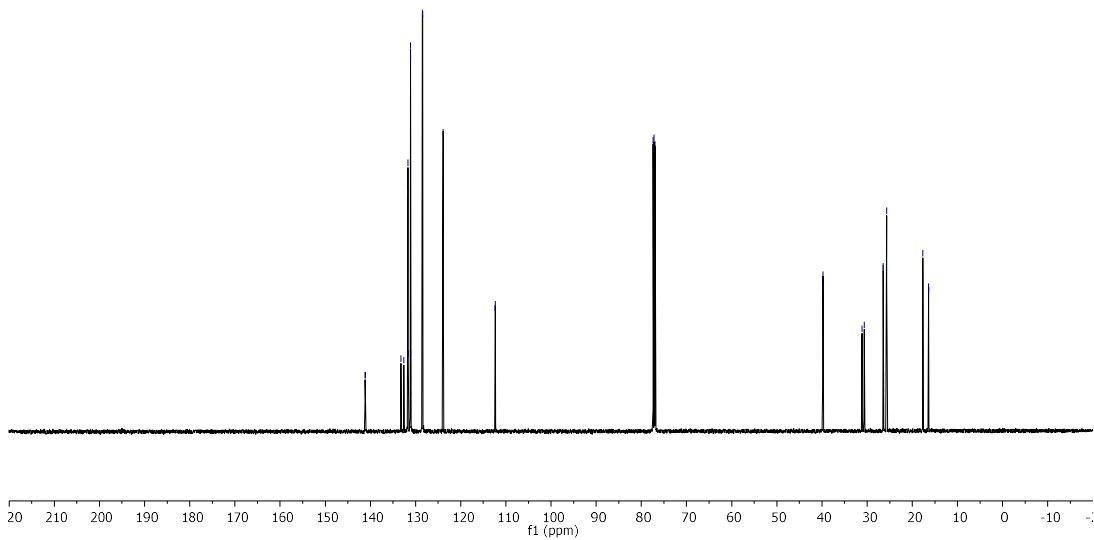

DS-HP-990-31P.5.fid  
31P

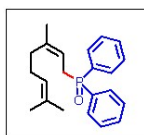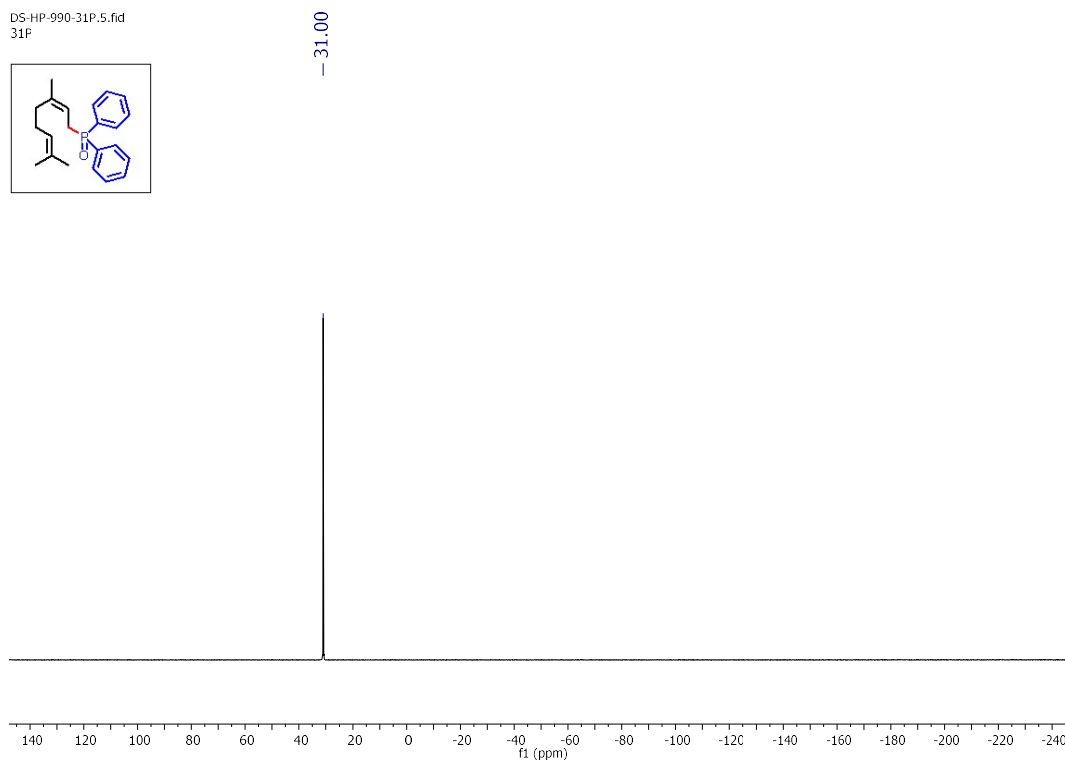

Figure S46.  $^1\text{H}$  NMR (500 MHz),  $^{13}\text{C}$   $\{^1\text{H}\}$  NMR (125 MHz), and  $^{31}\text{P}$   $\{^1\text{H}\}$  NMR (200 MHz) spectrum of Compound 3at in  $\text{CDCl}_3$

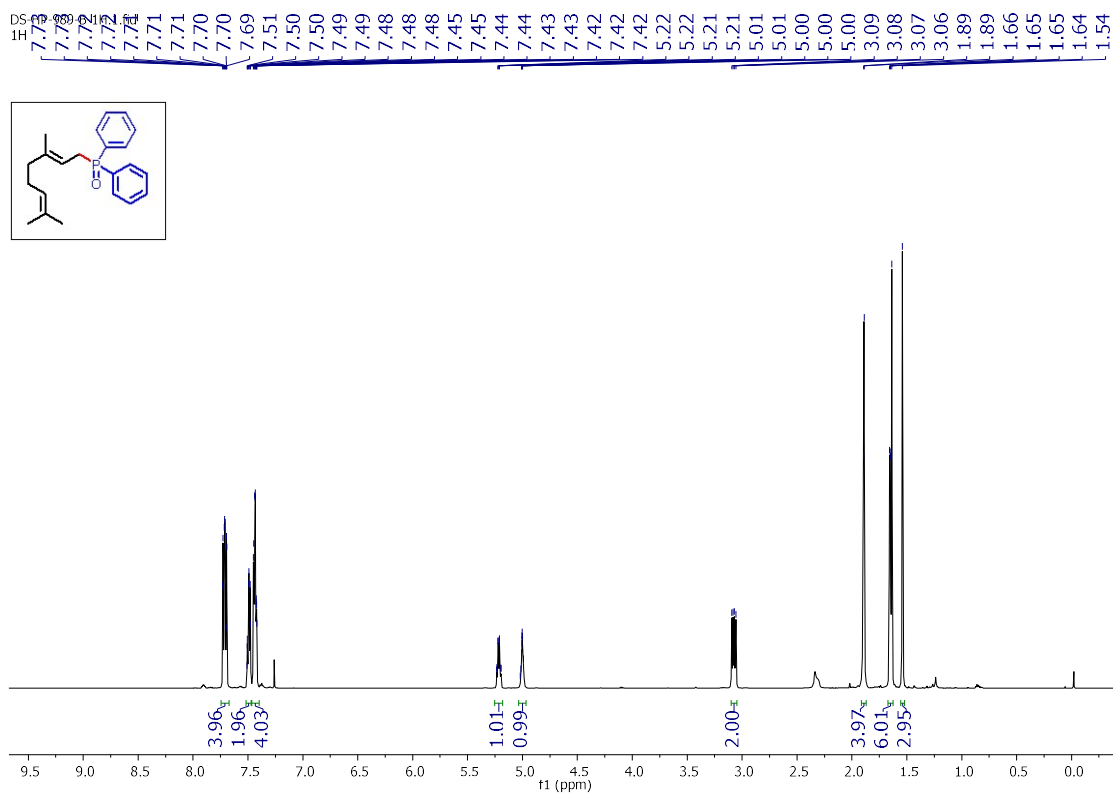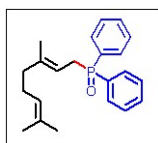

DS-HP-989-B-13C.5.fid  
13C

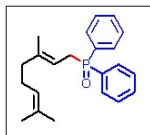

141.27  
141.19  
133.25  
132.60  
131.95  
131.78  
131.77  
131.15  
131.09  
128.61  
128.53  
123.95  
112.77  
112.72  
77.37  
77.16  
76.95  
32.14  
32.13  
30.77  
30.30  
26.16  
26.14  
25.76  
23.52  
23.51  
17.77

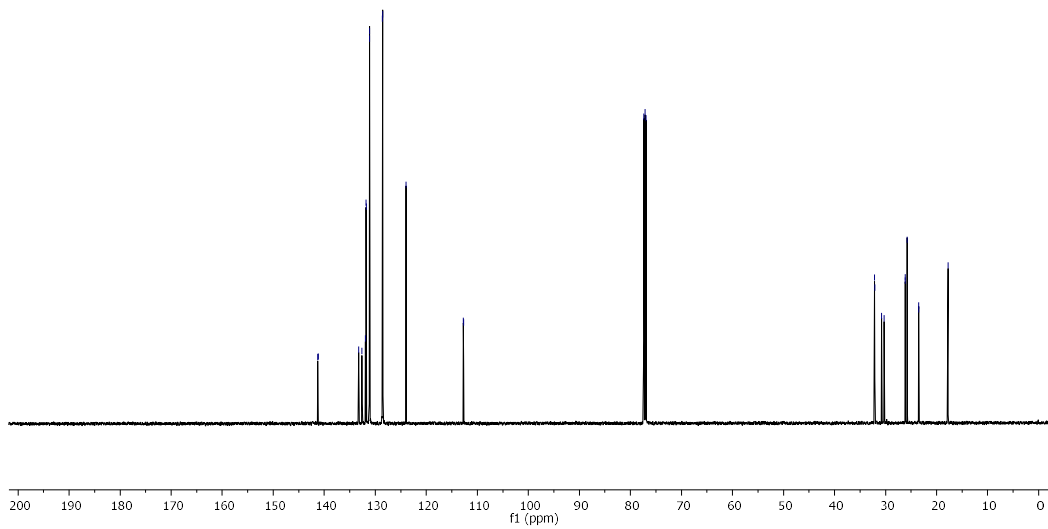

DS-HP-989-B-31P.4.fid  
31P

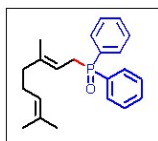

-30.81

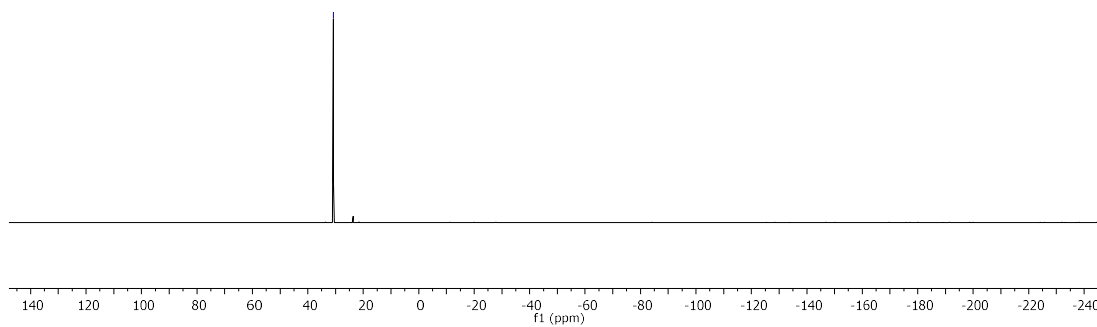

Figure S47.  $^1\text{H}$  NMR (500 MHz),  $^{13}\text{C}$   $\{^1\text{H}\}$  NMR (125 MHz), and  $^{31}\text{P}$   $\{^1\text{H}\}$  NMR (200 MHz) spectrum of Compound 3au in  $\text{CDCl}_3$

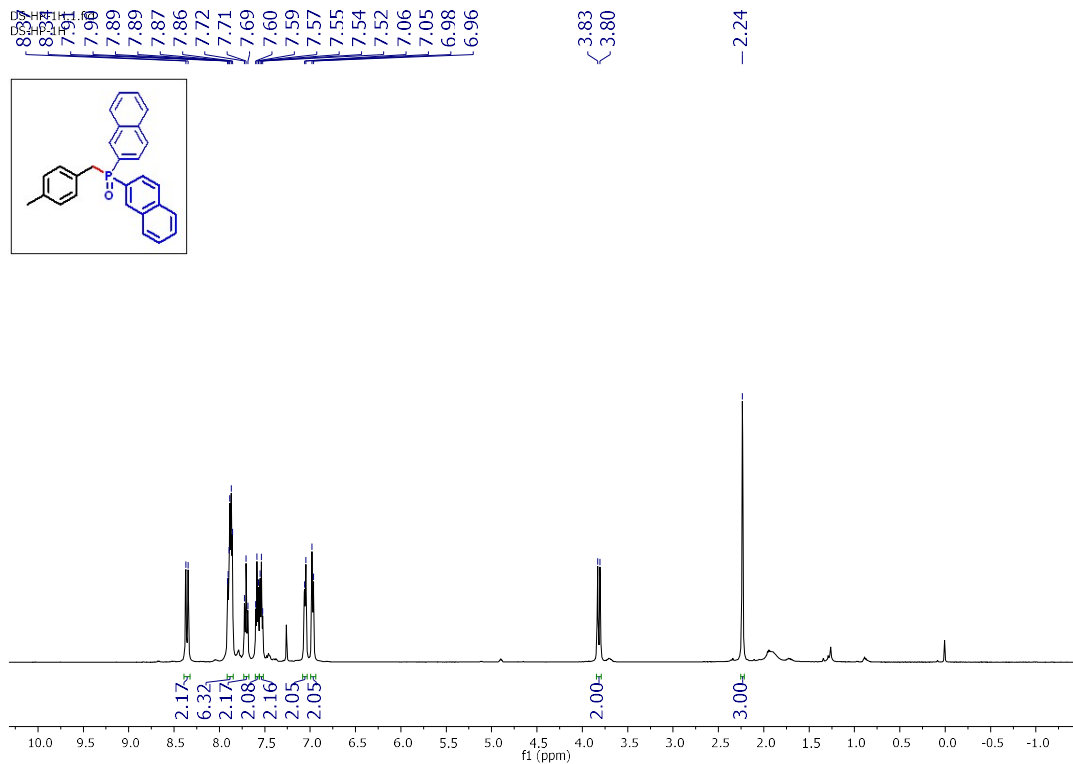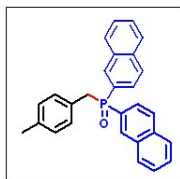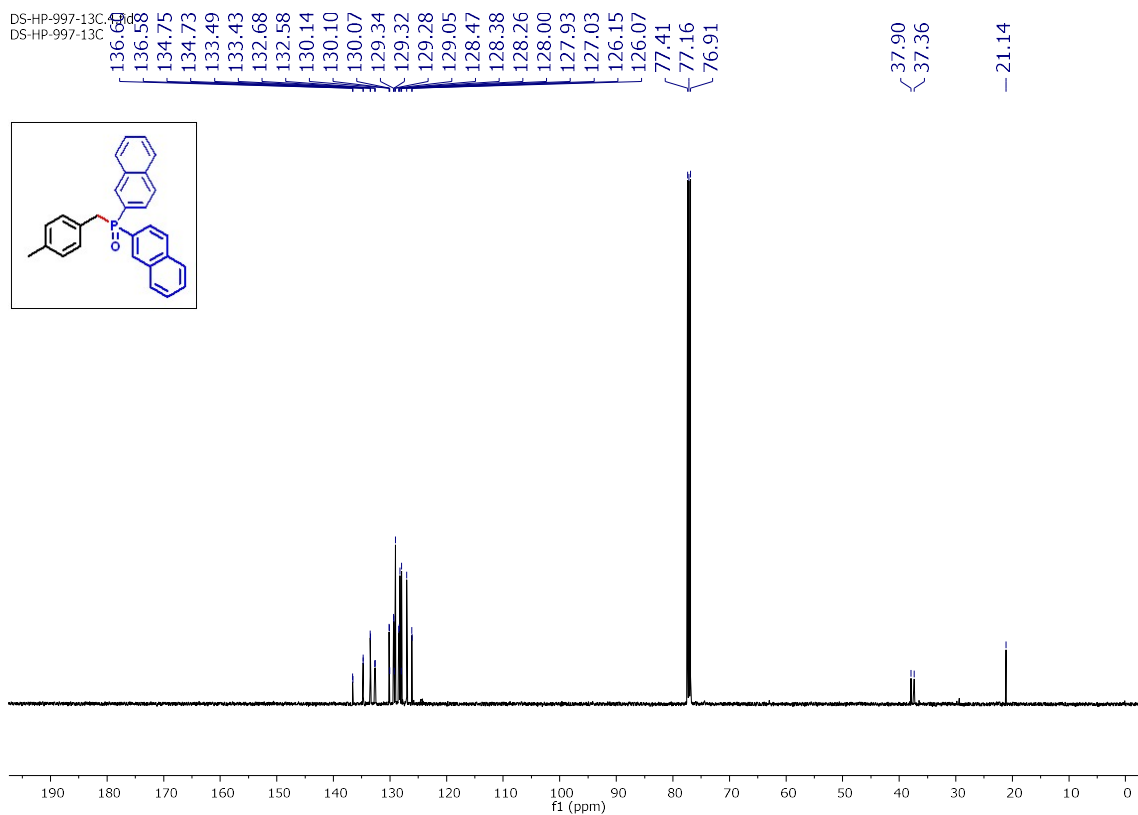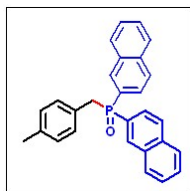

DS-HP-997-31P.5.fid  
DS-HP-997-31P

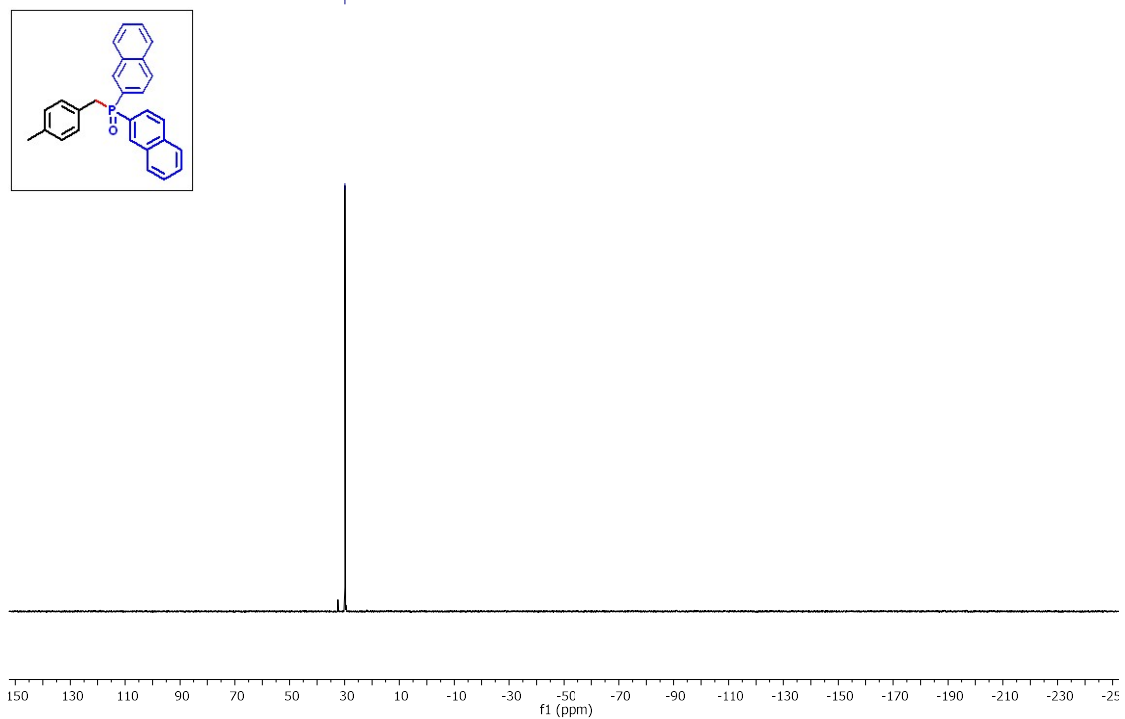

Figure S48.  $^1\text{H}$  NMR (500 MHz),  $^{13}\text{C}$   $\{^1\text{H}\}$  NMR (125 MHz), and  $^{31}\text{P}$   $\{^1\text{H}\}$  NMR (200 MHz) spectrum of Compound 3av in  $\text{CDCl}_3$

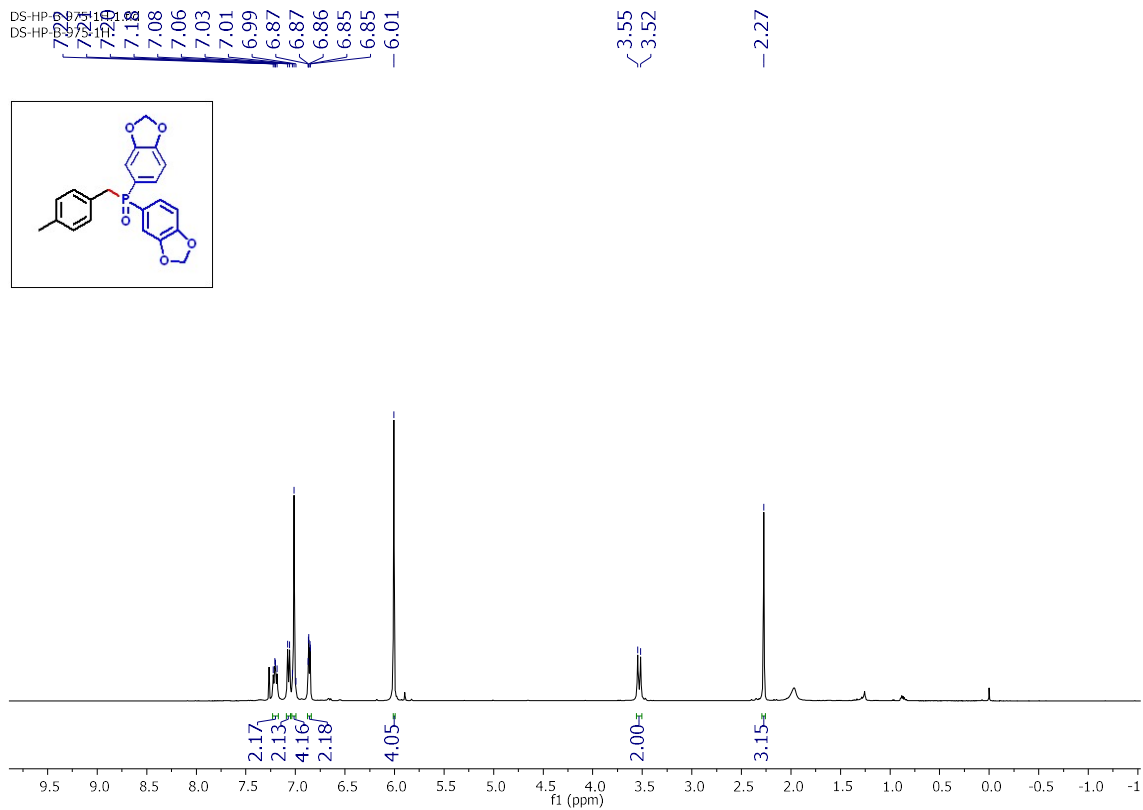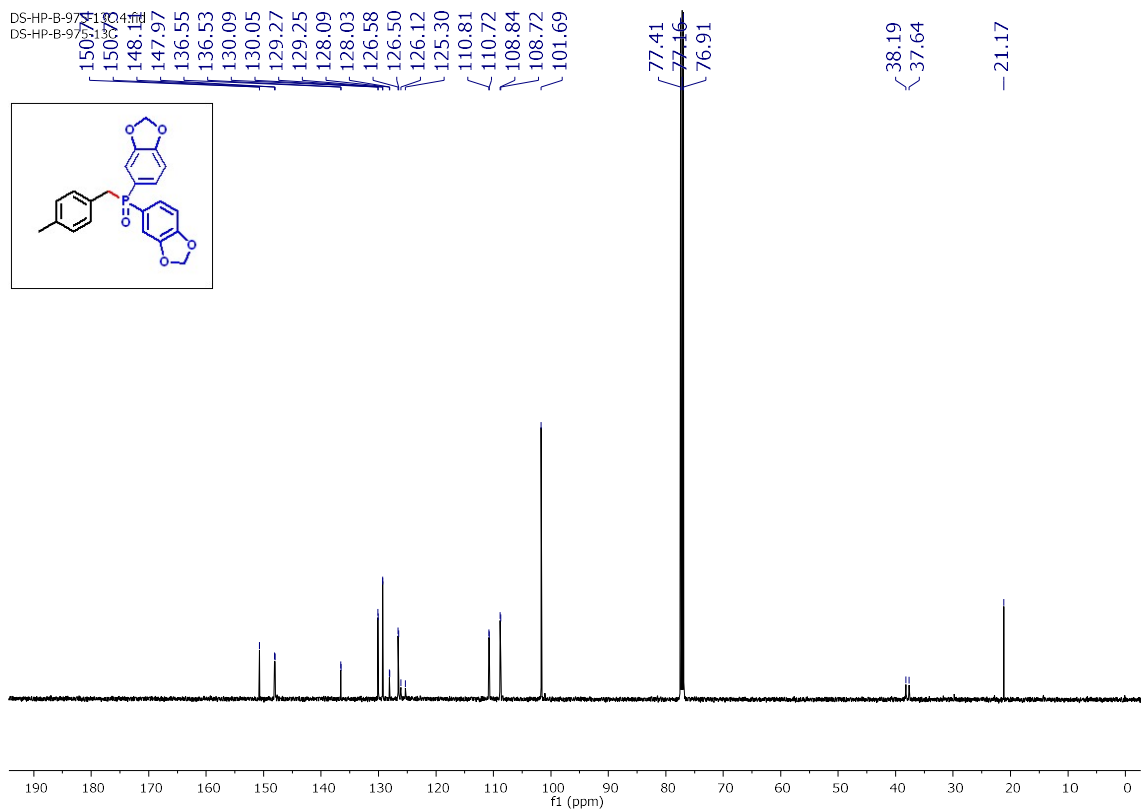

DS-HP-B-975-31P.5.fid  
DS-HP-B-975-31P

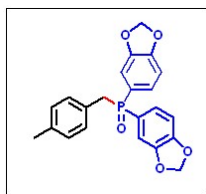

-29.92

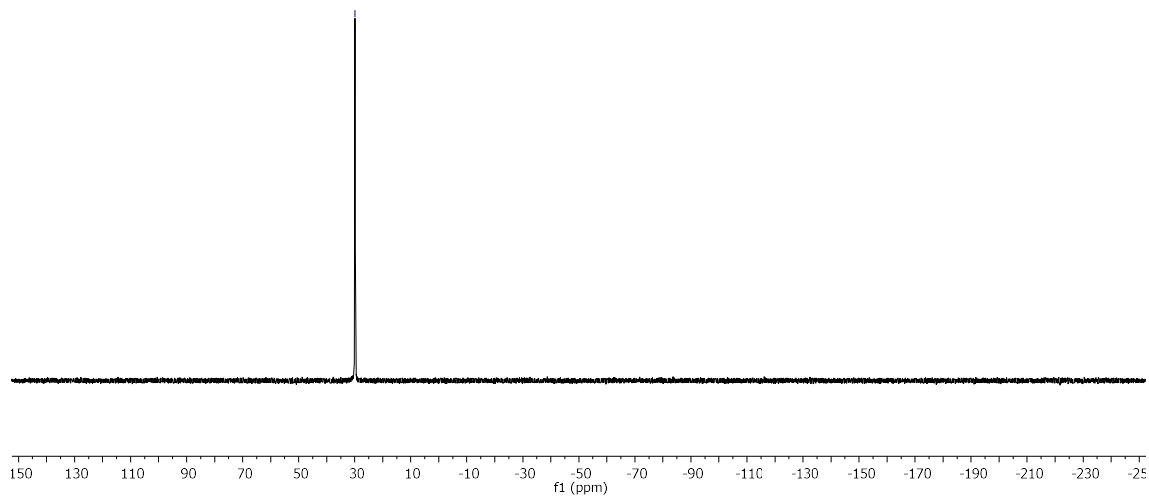

Figure S49.  $^1\text{H}$  NMR (500 MHz),  $^{13}\text{C}\{^1\text{H}\}$  NMR (125 MHz), and  $^{31}\text{P}\{^1\text{H}\}$  NMR (200 MHz) spectrum of Compound 3aw in  $\text{CDCl}_3$

DS-HP-867-A-1H.1.fid  
DS-HP-867-A-1H

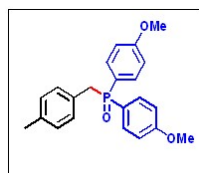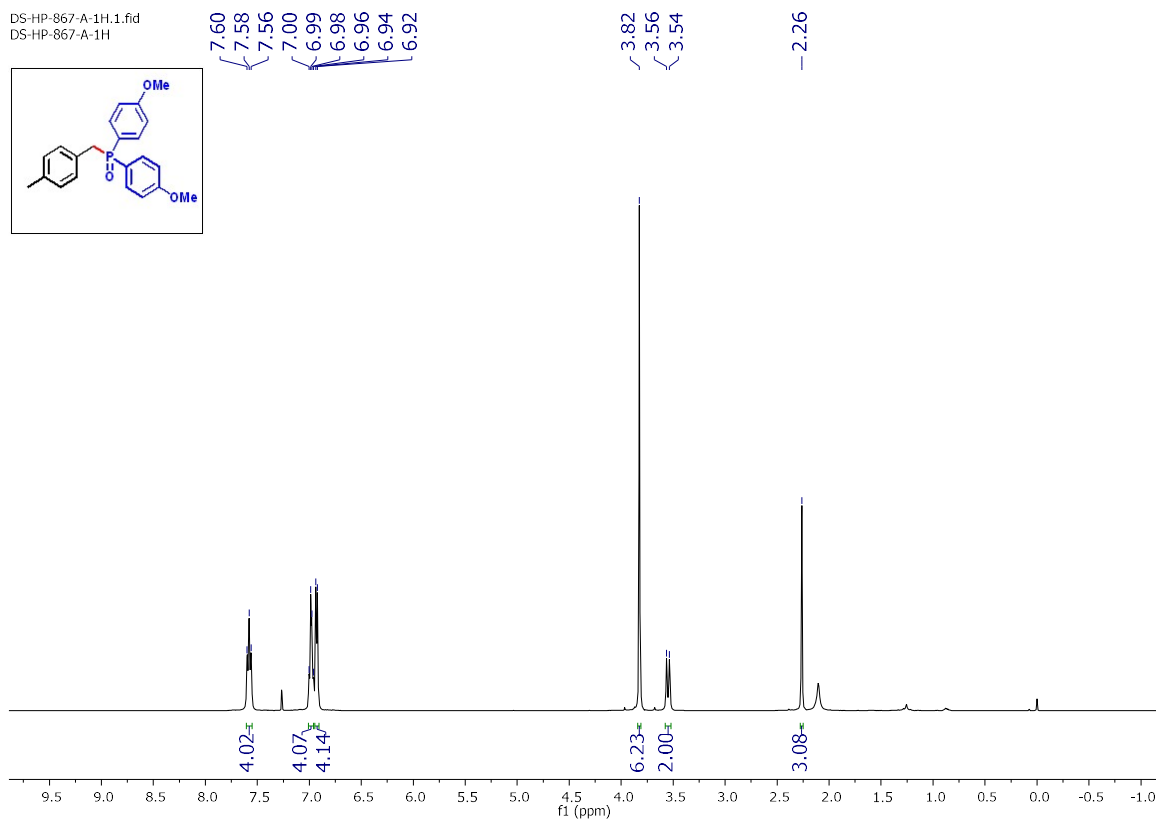

DS-HP-867-A-13C.3.fid  
DS-HP-867-A-13C

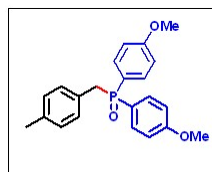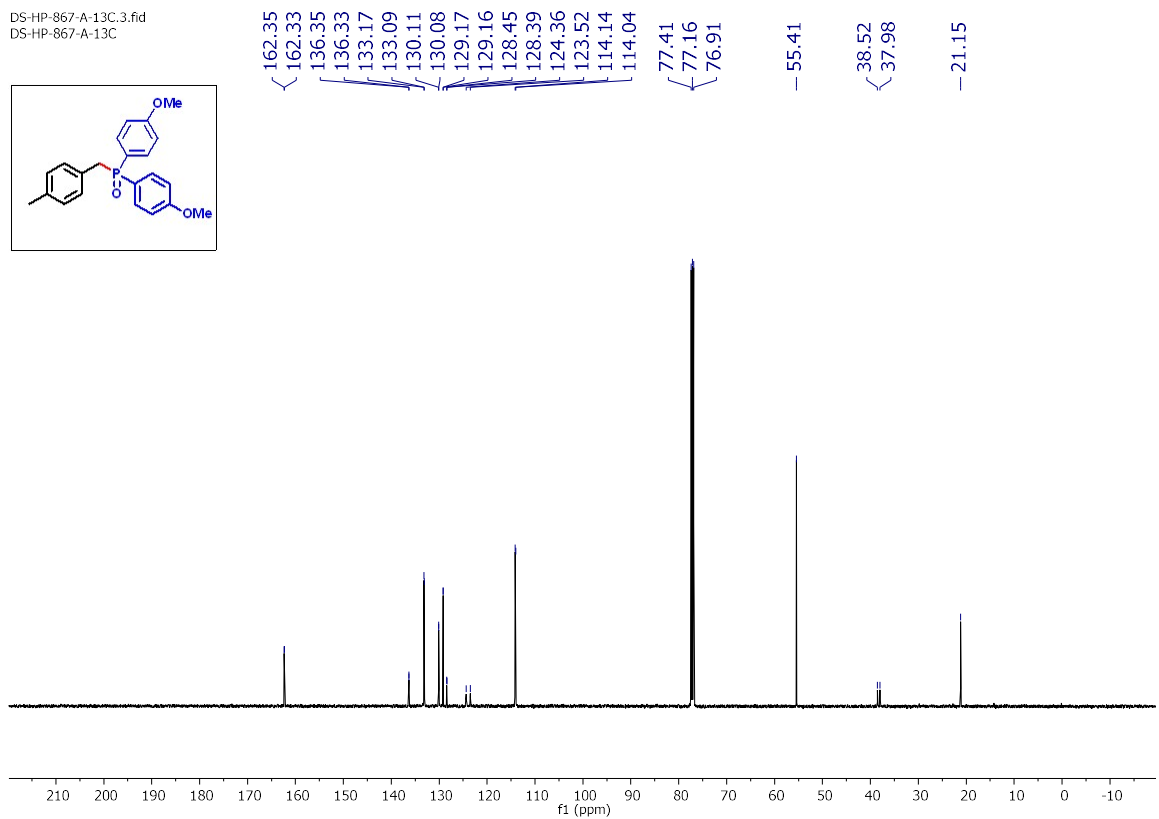

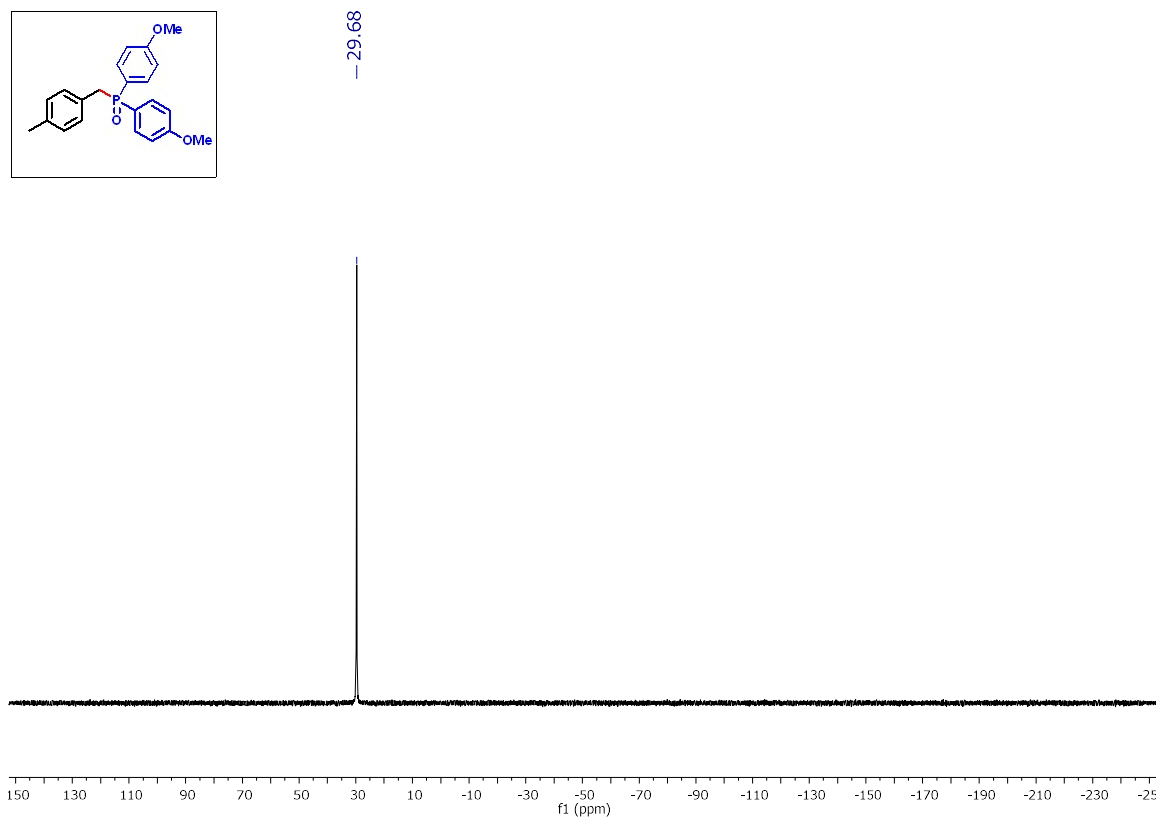

Figure S50.  $^1\text{H}$  NMR (500 MHz),  $^{13}\text{C}$   $\{^1\text{H}\}$  NMR (125 MHz), and  $^{31}\text{P}$   $\{^1\text{H}\}$  NMR (200 MHz) spectrum of Compound 3ax in  $\text{CDCl}_3$

DS-HP-877-A-1H.1  
DS-HP-877-A-1H

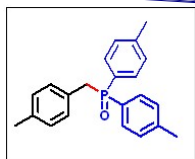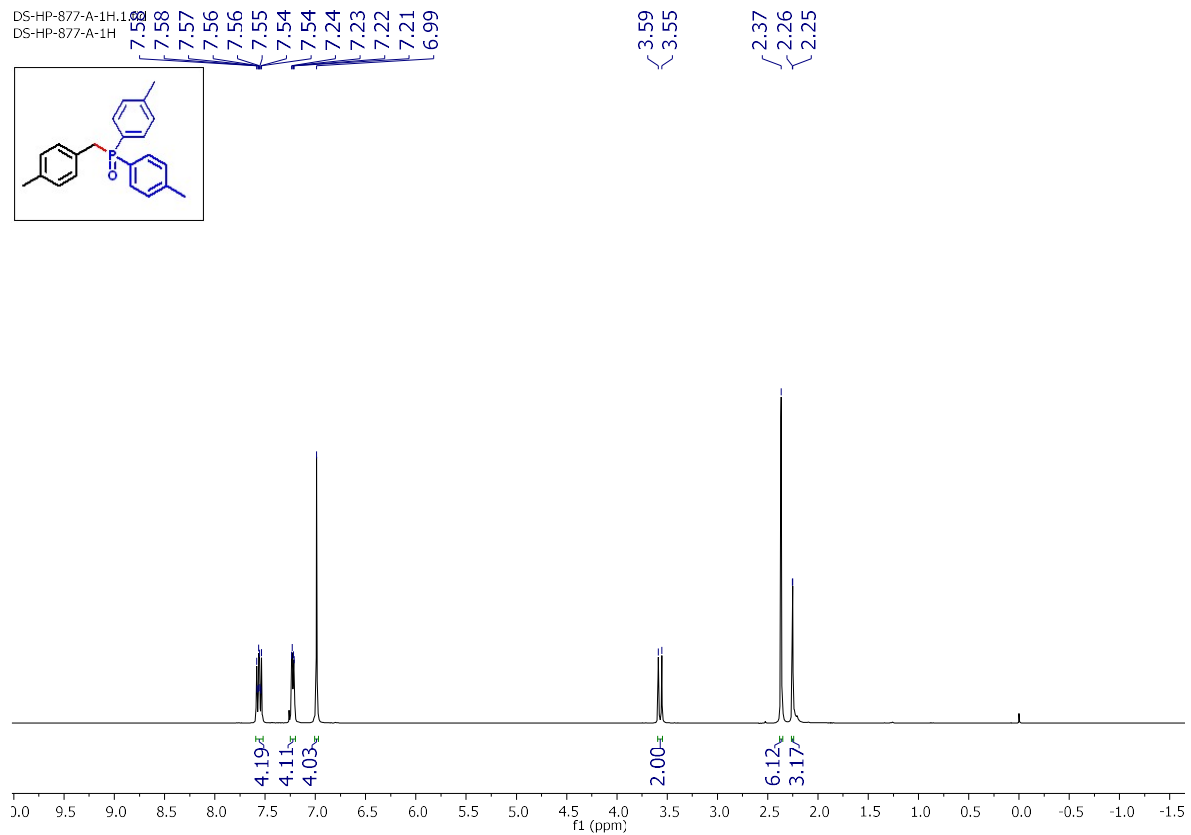

DS-HP-877-A-13C.13.fid  
DS-HP-877-A-13C

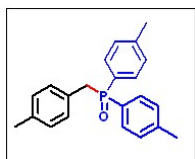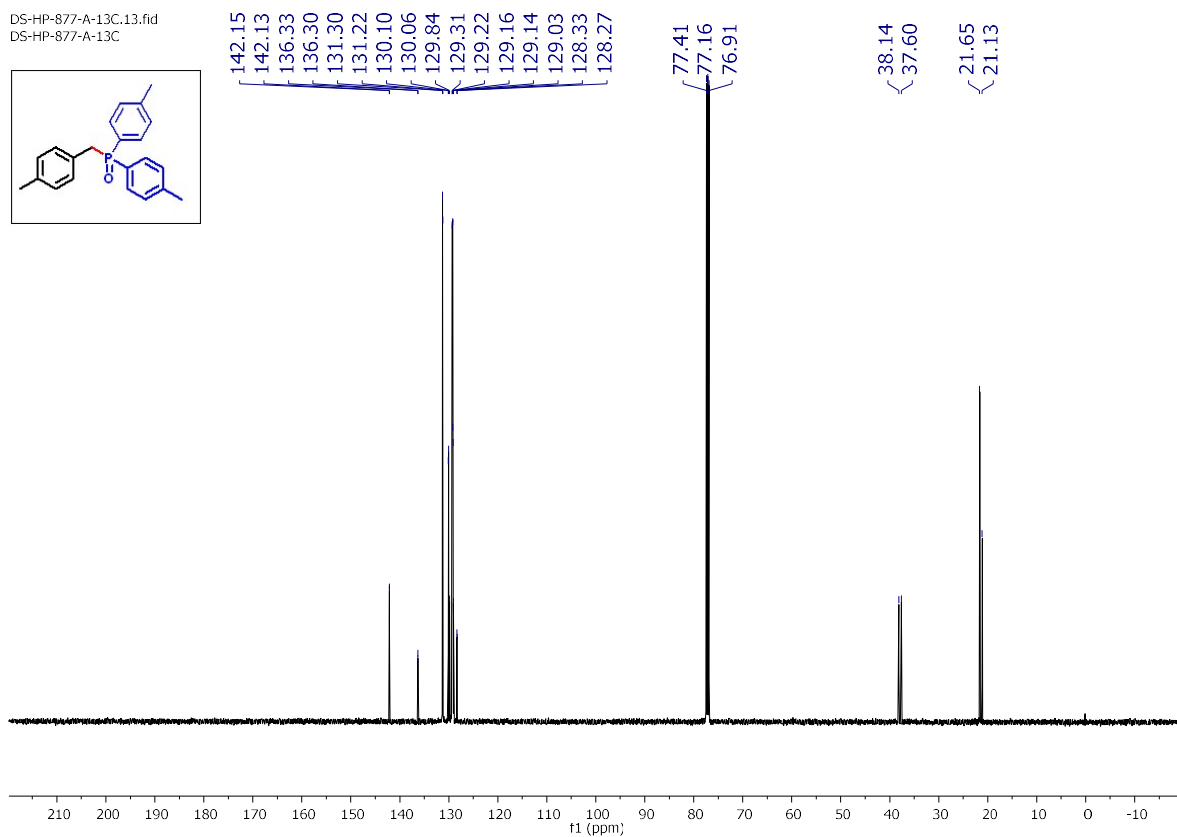

DS-HP-877-A-31P.15.fid  
DS-HP-877-A-31P

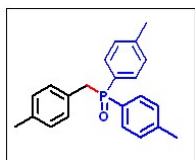

-29.78

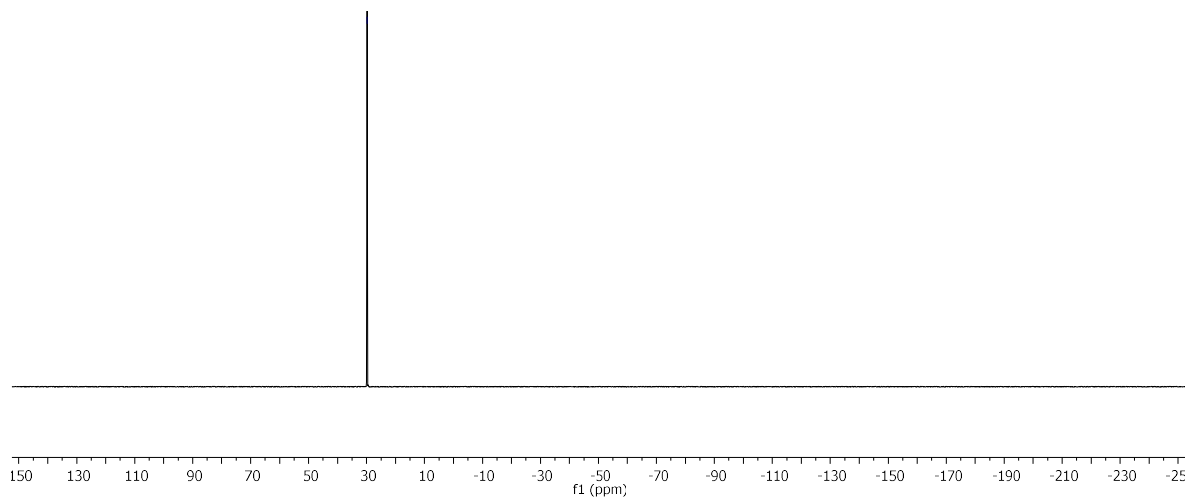

Figure S51. <sup>1</sup>H NMR (500 MHz), <sup>13</sup>C {<sup>1</sup>H} NMR (125 MHz), and <sup>31</sup>P {<sup>1</sup>H} NMR (200 MHz) spectrum of Compound 3ay in CDCl<sub>3</sub>

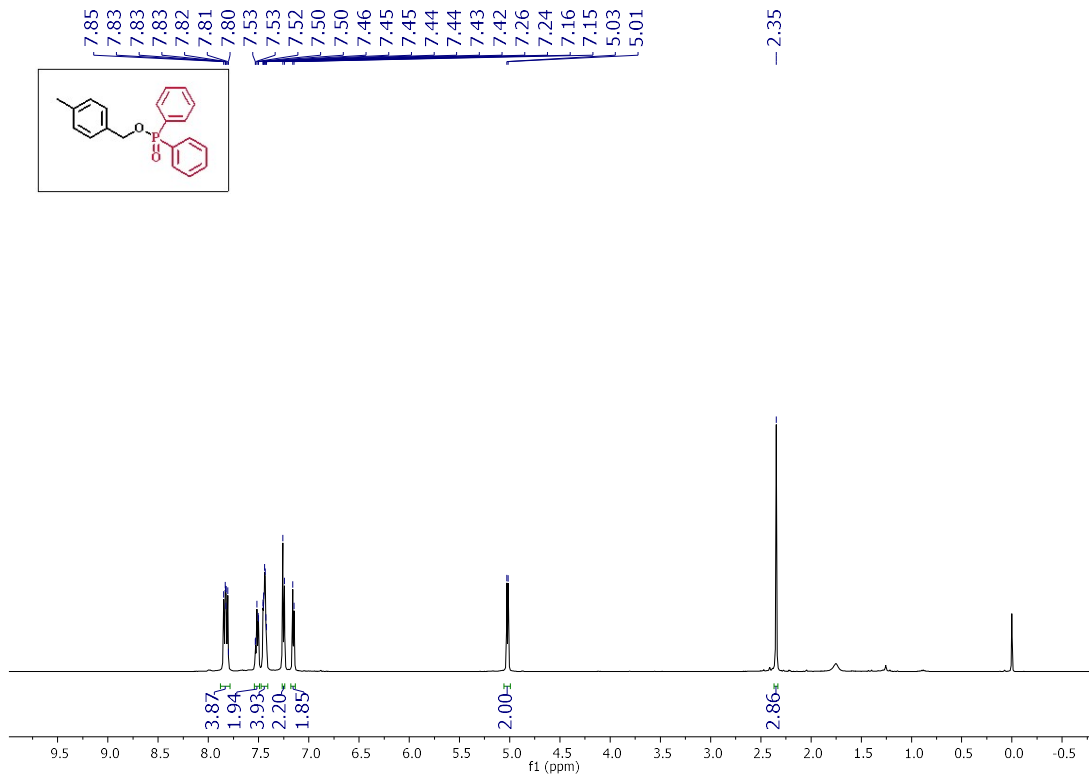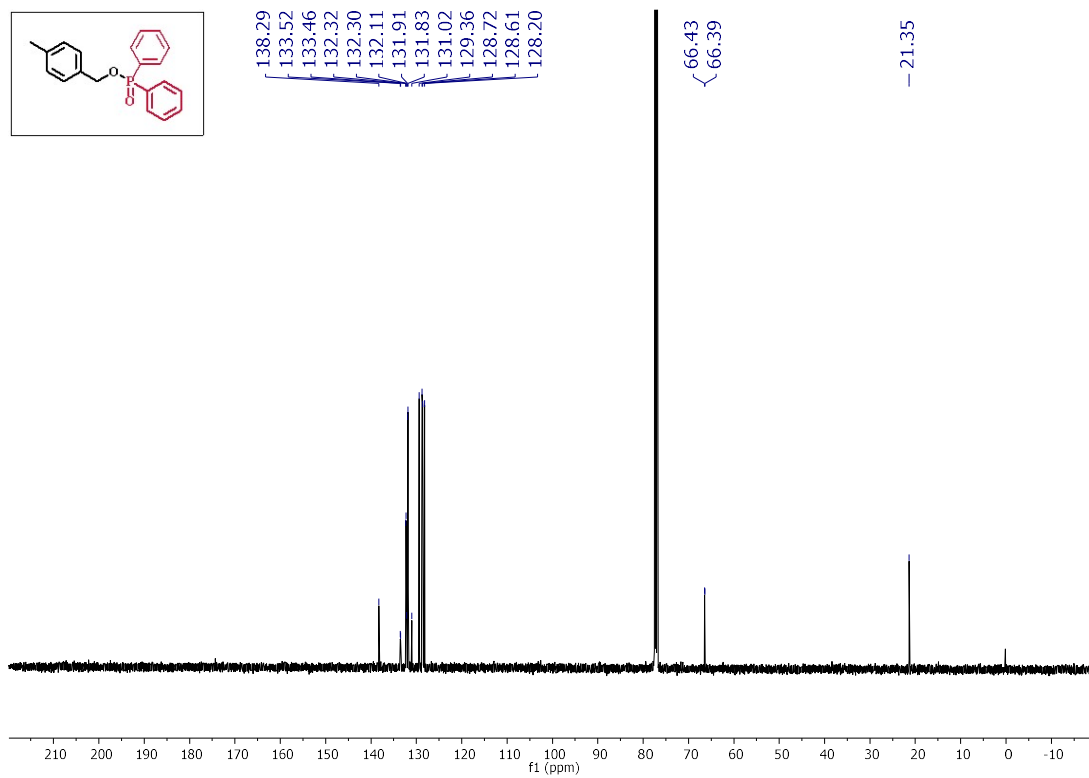

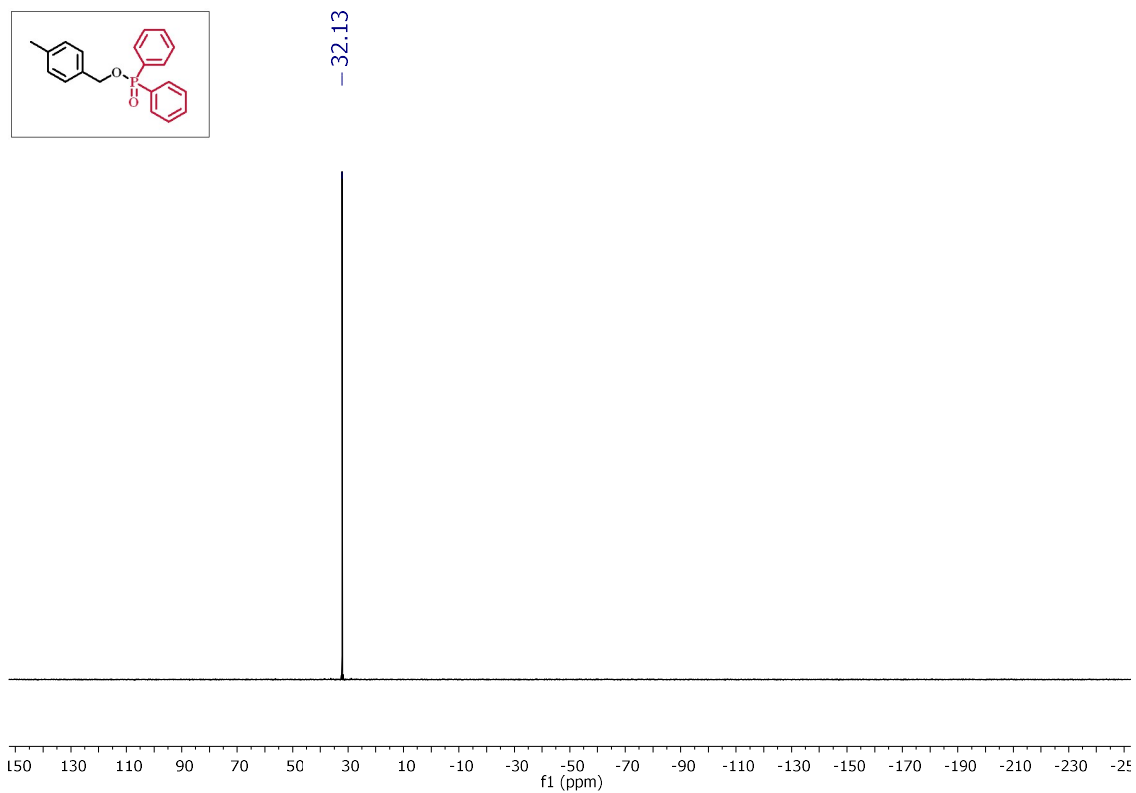

Figure S52.  $^1\text{H}$  NMR (500 MHz),  $^{13}\text{C}\{^1\text{H}\}$  NMR (125 MHz), and  $^{31}\text{P}\{^1\text{H}\}$  NMR (200 MHz) spectrum of Compound 4a in  $\text{CDCl}_3$

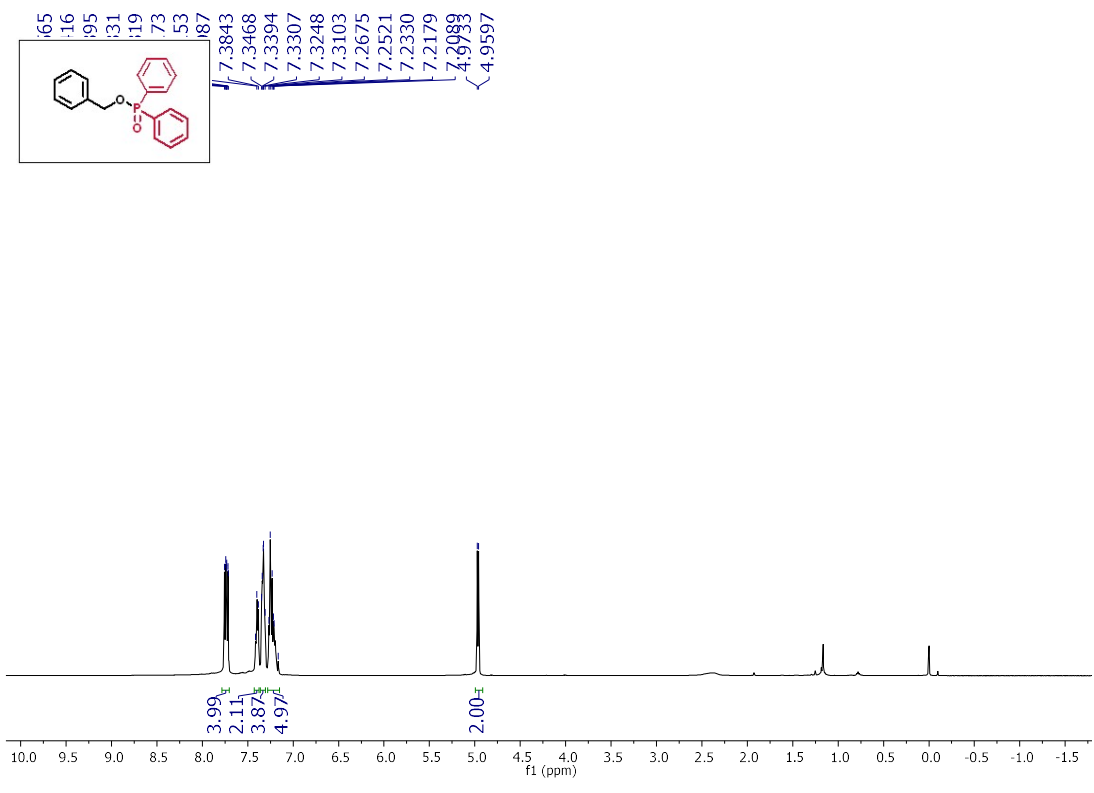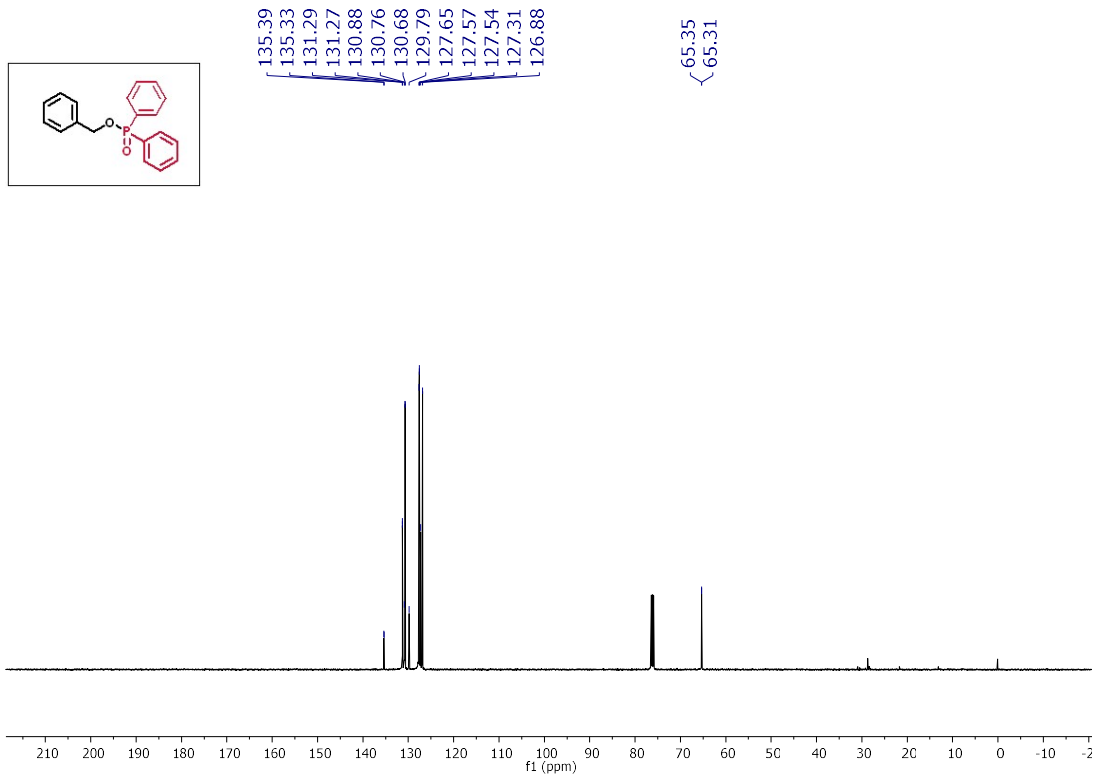

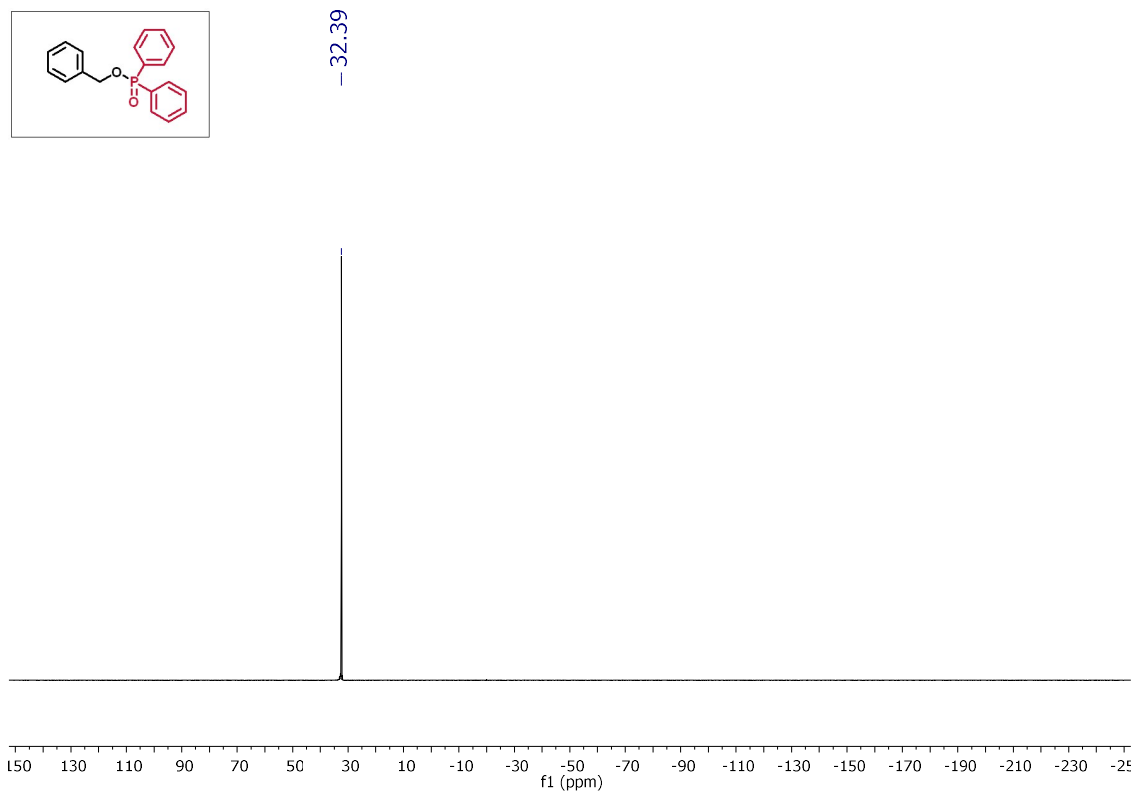

Figure S53.  $^1\text{H}$  NMR (500 MHz),  $^{13}\text{C}$   $\{^1\text{H}\}$  NMR (125 MHz), and  $^{31}\text{P}$   $\{^1\text{H}\}$  NMR (200 MHz) spectrum of Compound 4b in  $\text{CDCl}_3$

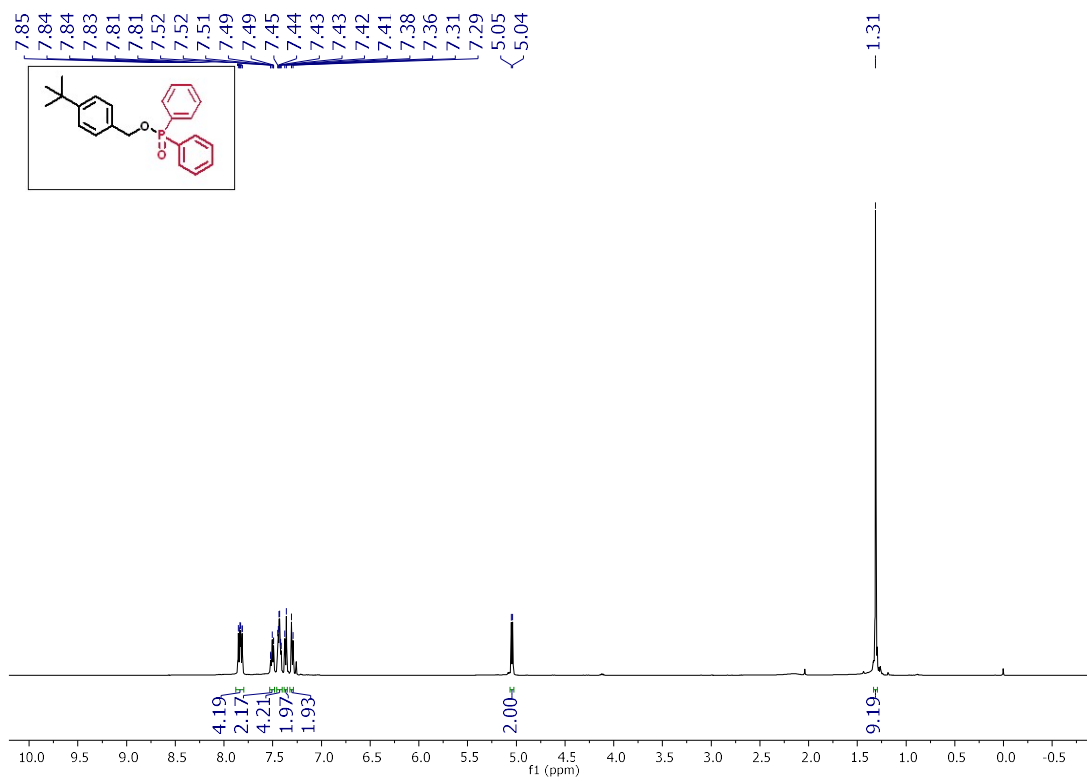

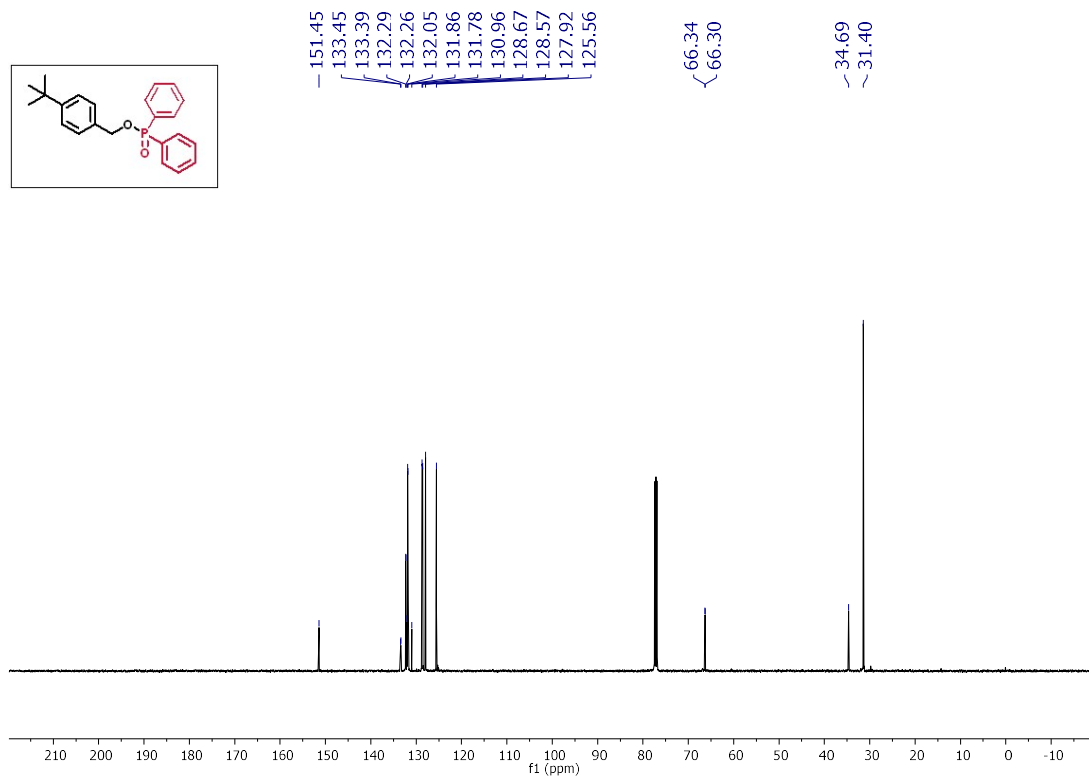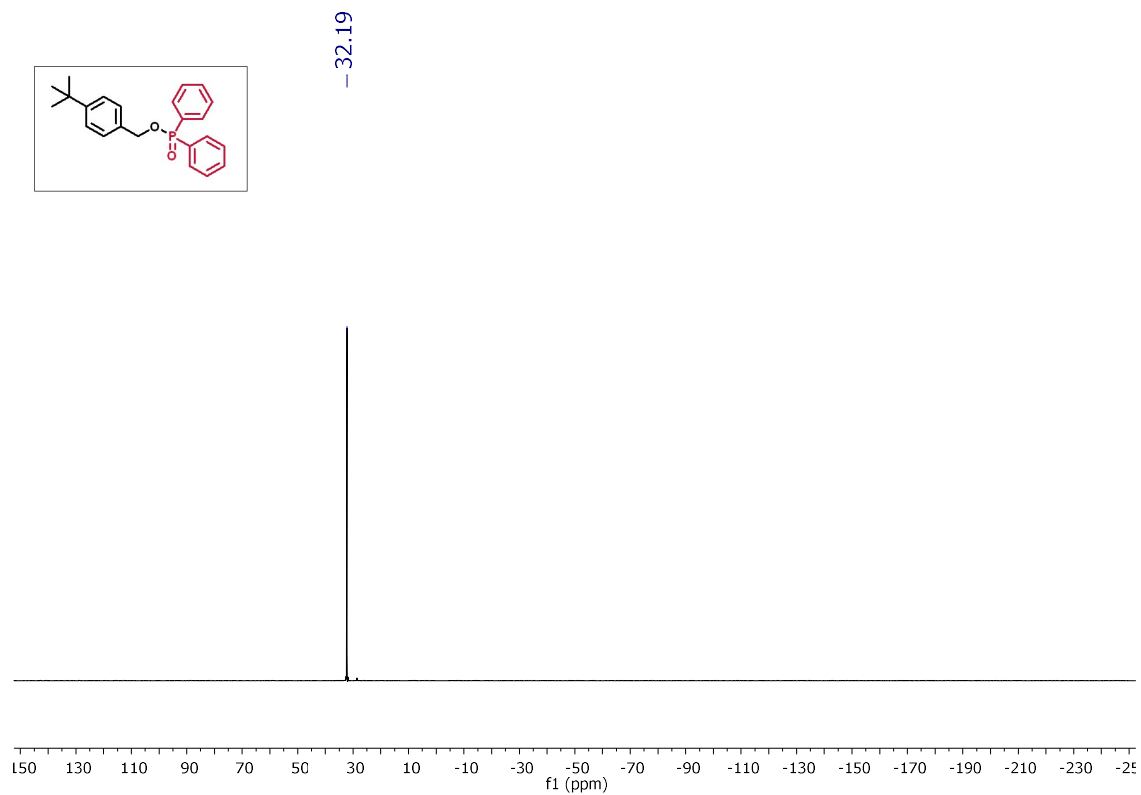

Figure S54.  $^1\text{H}$  NMR (500 MHz),  $^{13}\text{C}\{^1\text{H}\}$  NMR (125 MHz), and  $^{31}\text{P}\{^1\text{H}\}$  NMR (200 MHz) spectrum of Compound 4c in  $\text{CDCl}_3$

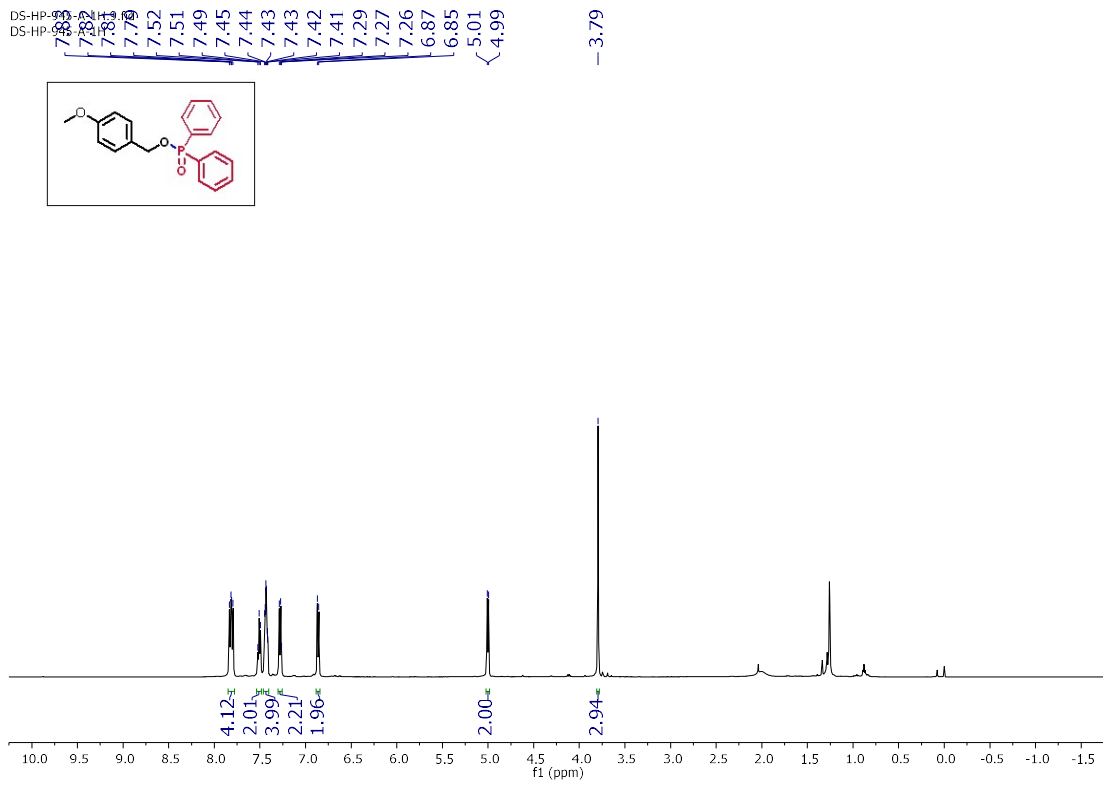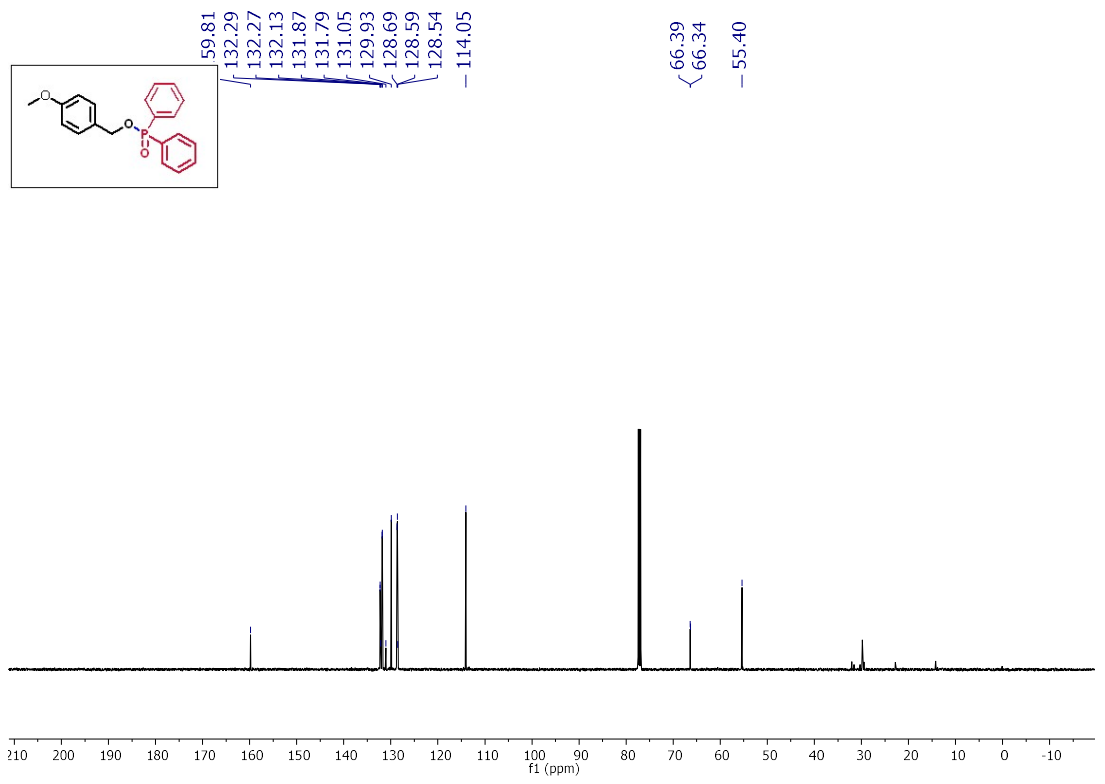

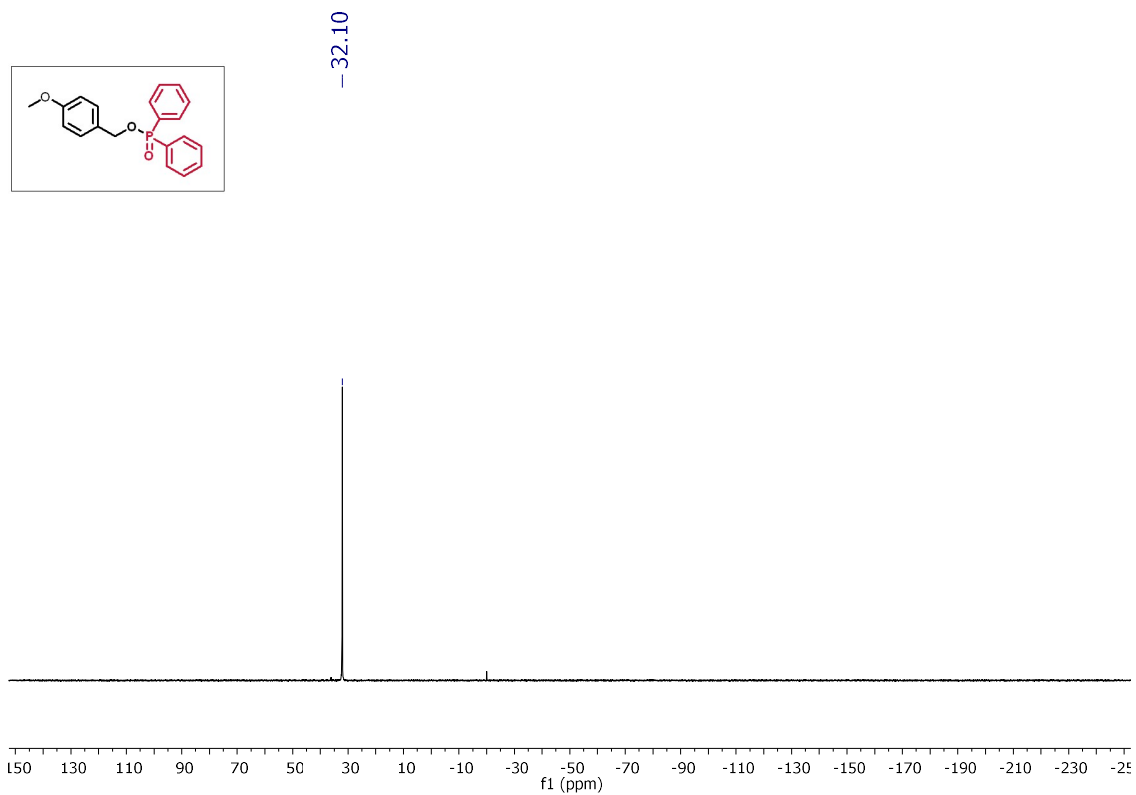

Figure S55.  $^1\text{H}$  NMR (500 MHz),  $^{13}\text{C}\{^1\text{H}\}$  NMR (125 MHz), and  $^{31}\text{P}\{^1\text{H}\}$  NMR (200 MHz) spectrum of Compound 4d in  $\text{CDCl}_3$

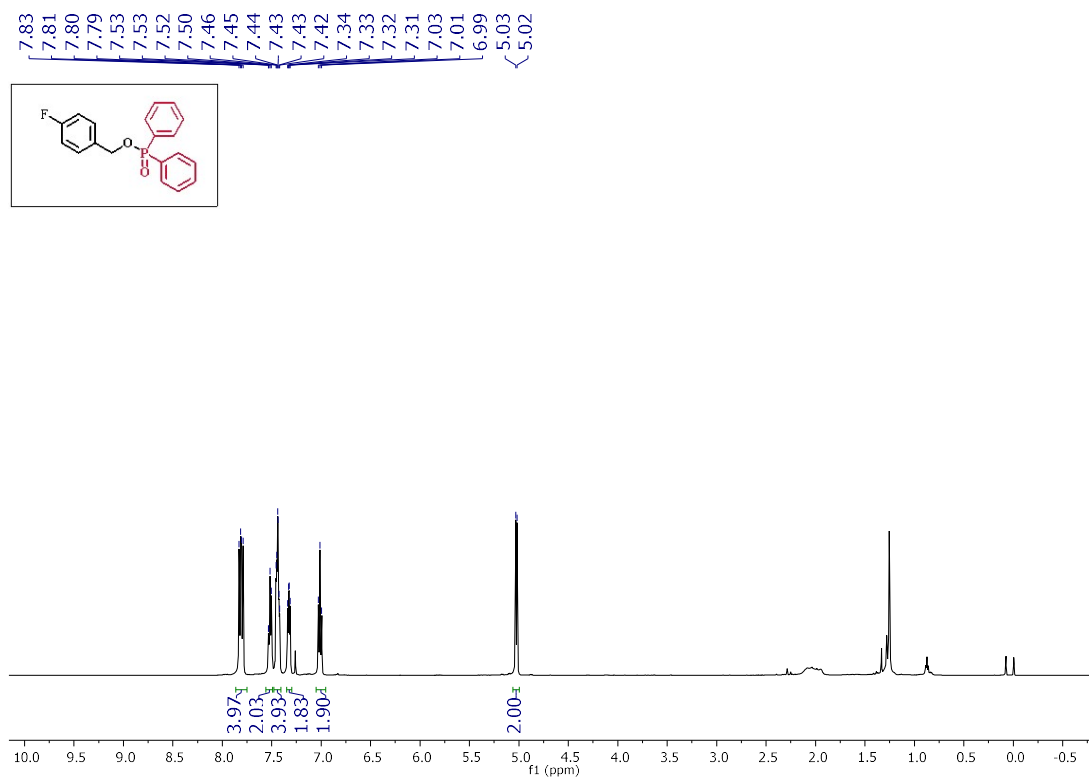

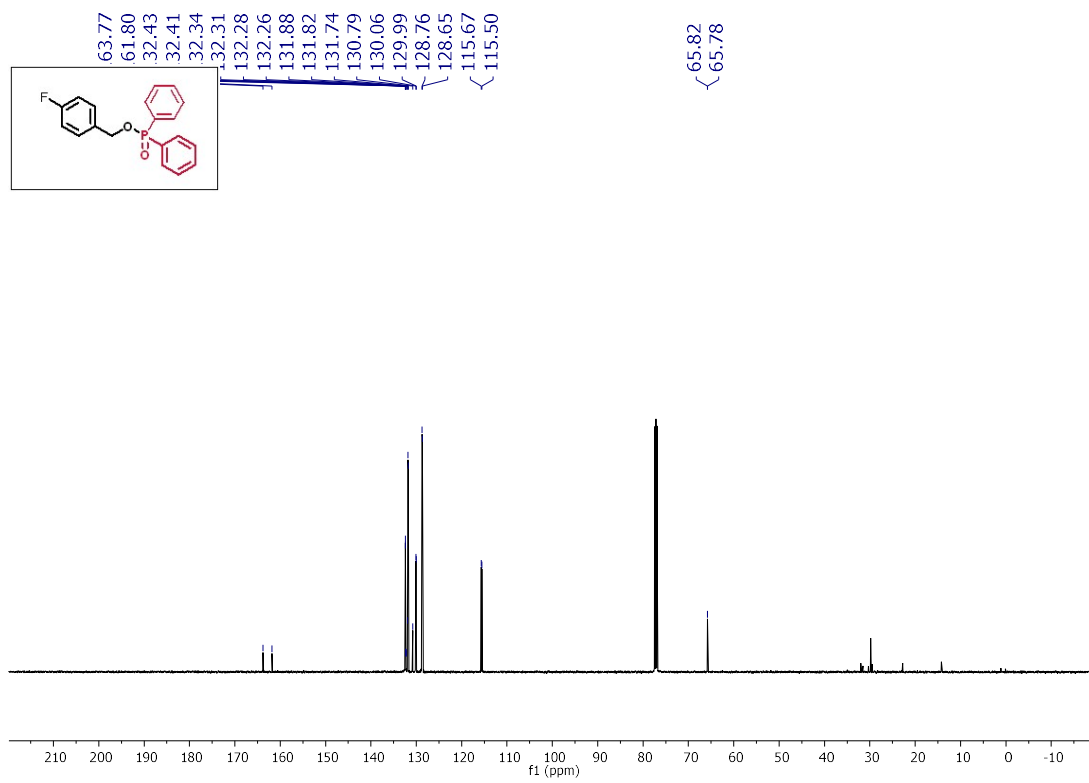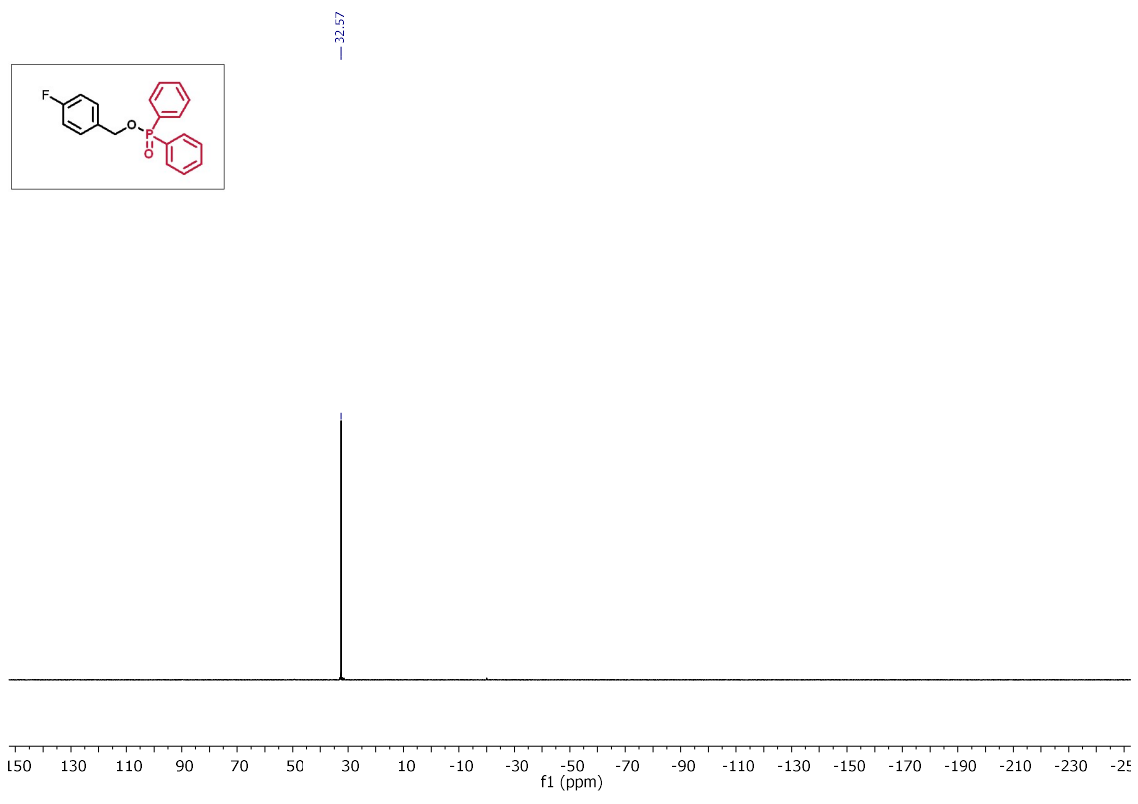

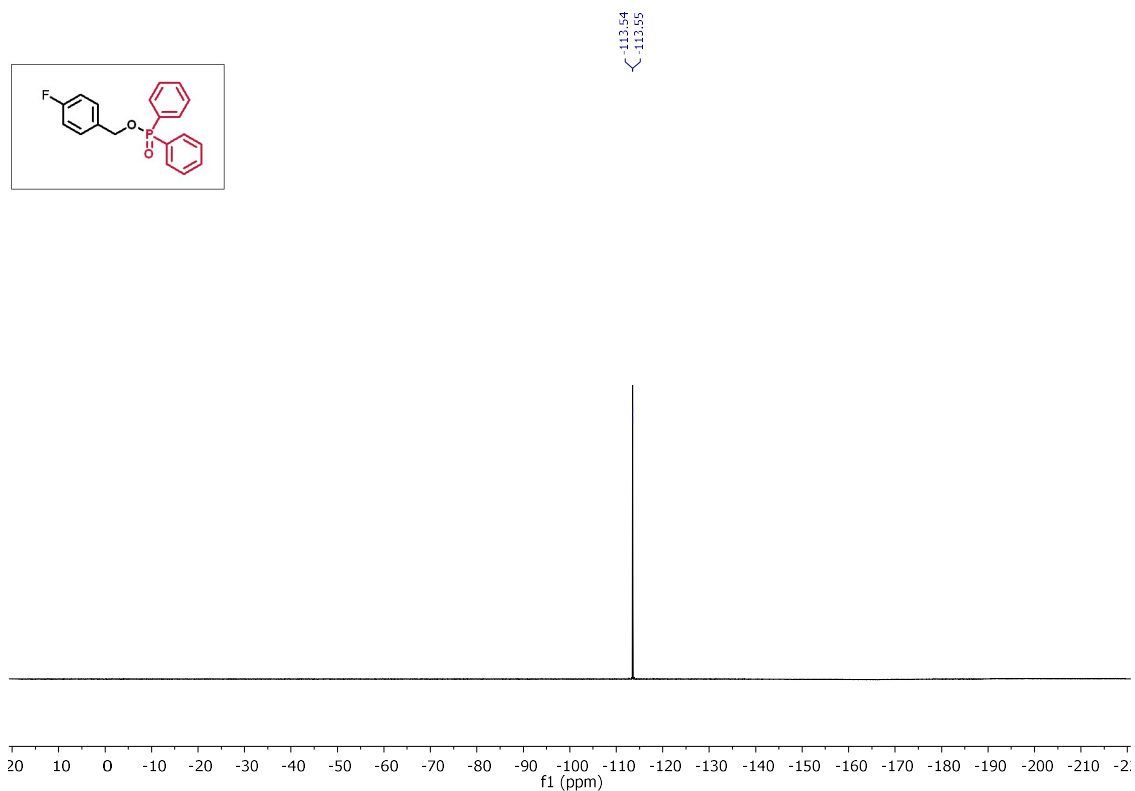

Figure S56.  $^1\text{H}$  NMR (500 MHz),  $^{13}\text{C}$   $\{^1\text{H}\}$  NMR (125 MHz), and  $^{31}\text{P}$   $\{^1\text{H}\}$  NMR (200 MHz)  $^{19}\text{F}$   $\{^1\text{H}\}$  NMR (402 MHz) spectrum of Compound 4e in  $\text{CDCl}_3$

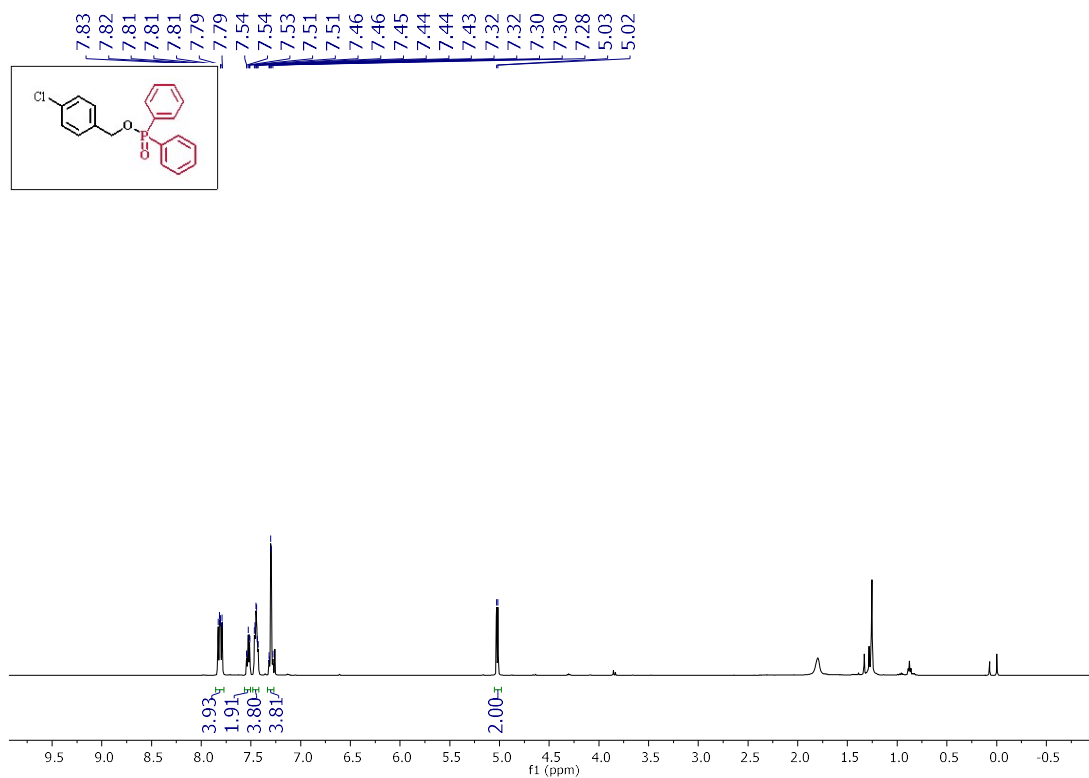

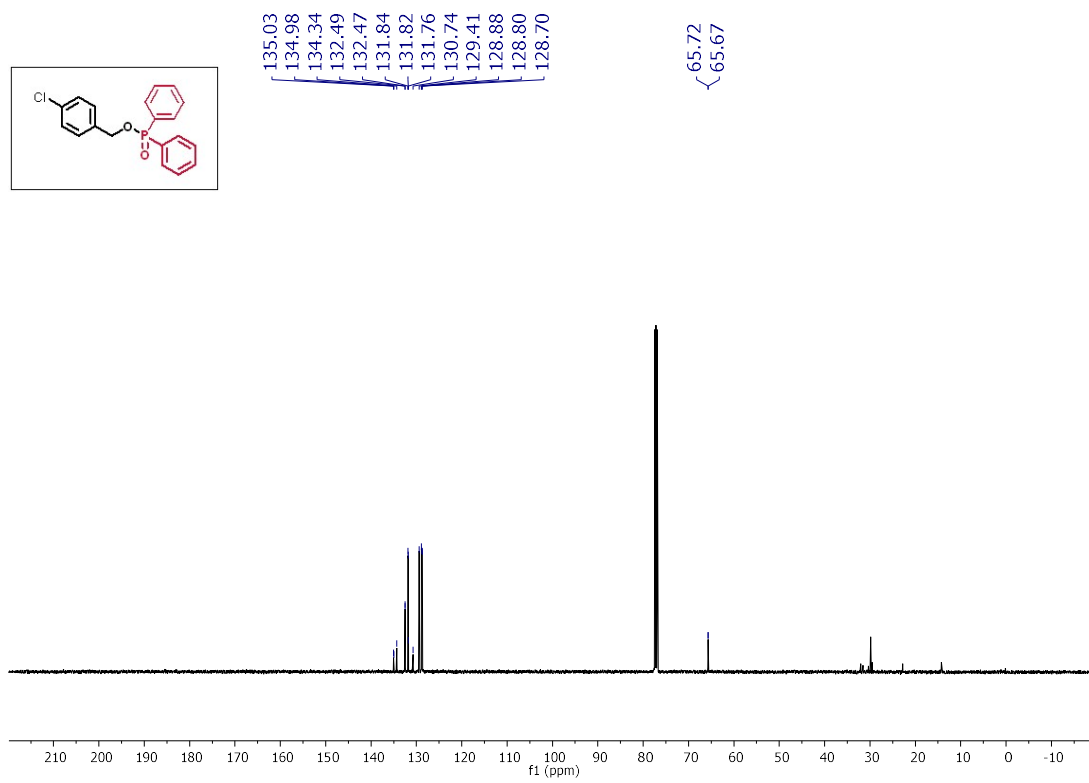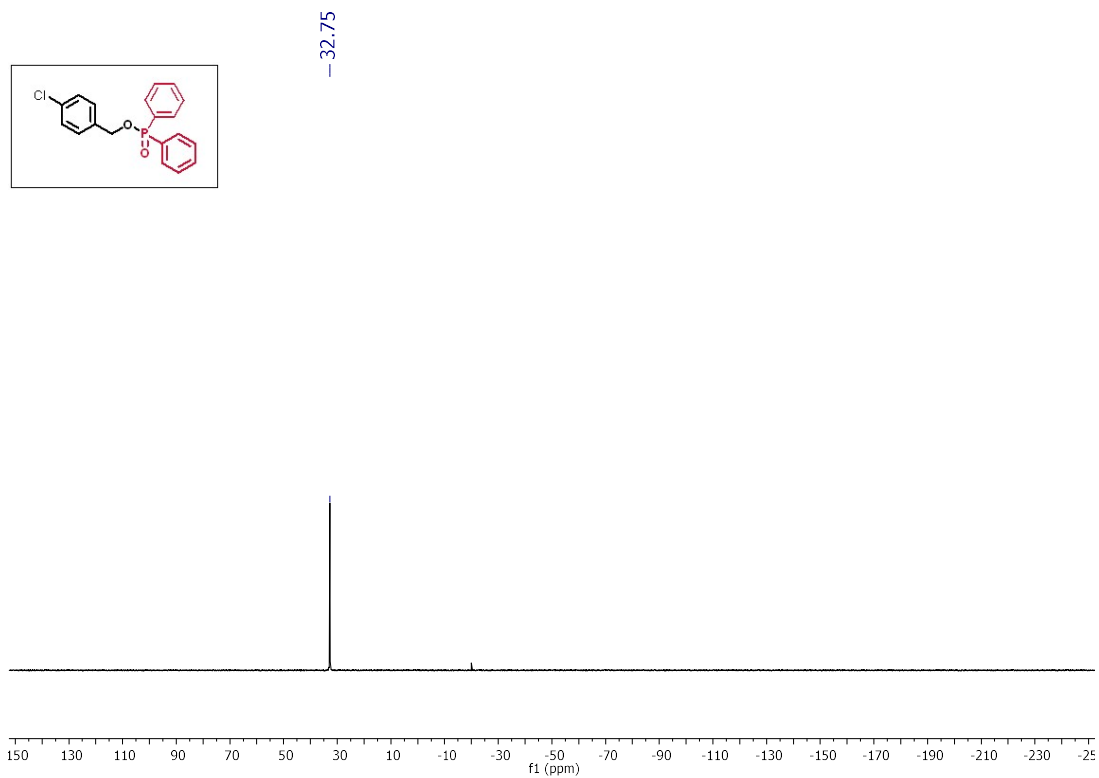

Figure S57.  $^1\text{H}$  NMR (500 MHz),  $^{13}\text{C}\{^1\text{H}\}$  NMR (125 MHz), and  $^{31}\text{P}\{^1\text{H}\}$  NMR (200 MHz) spectrum of Compound 4f in  $\text{CDCl}_3$

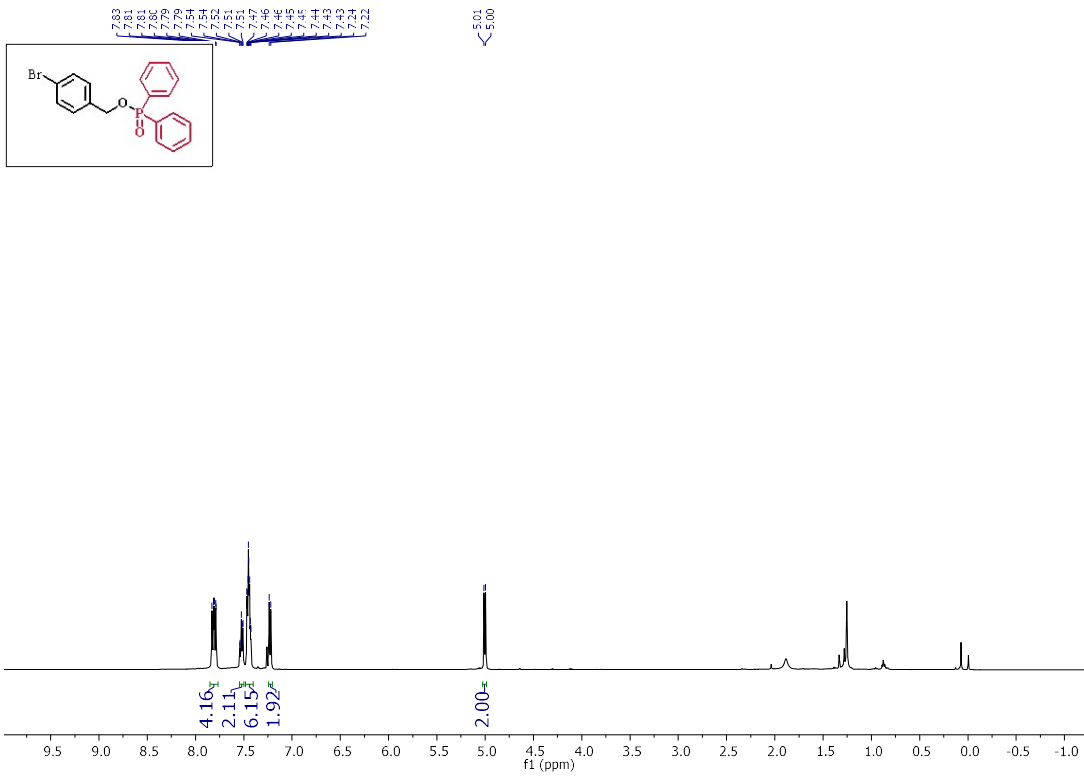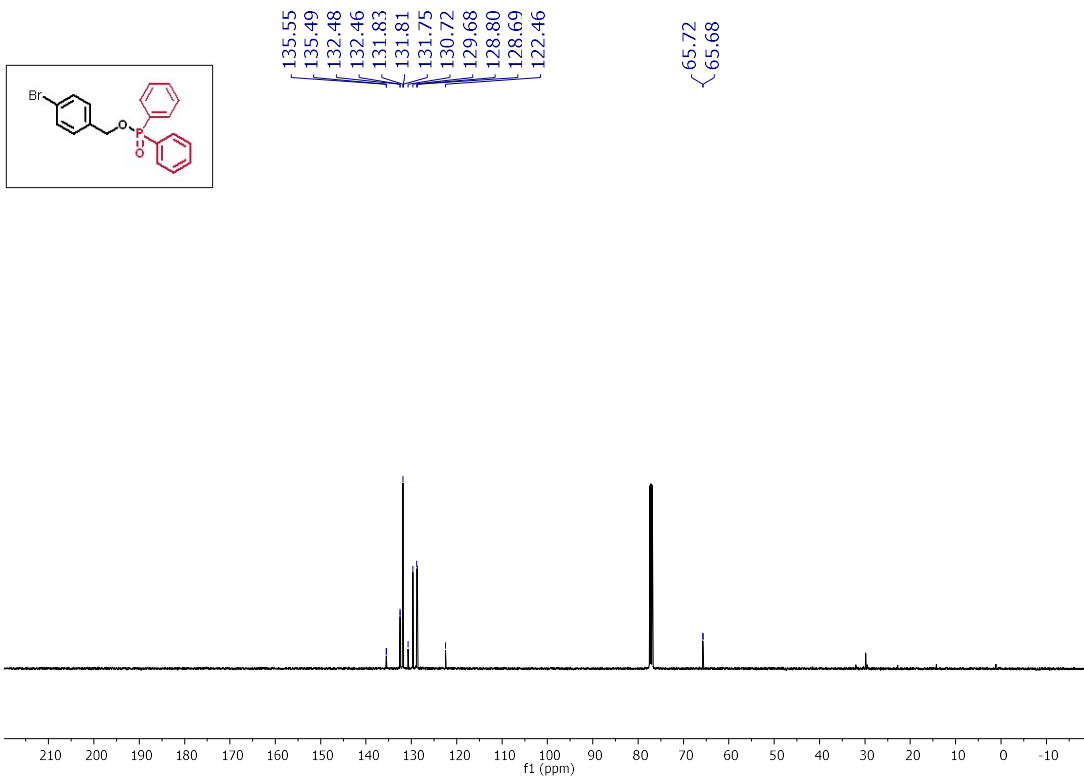

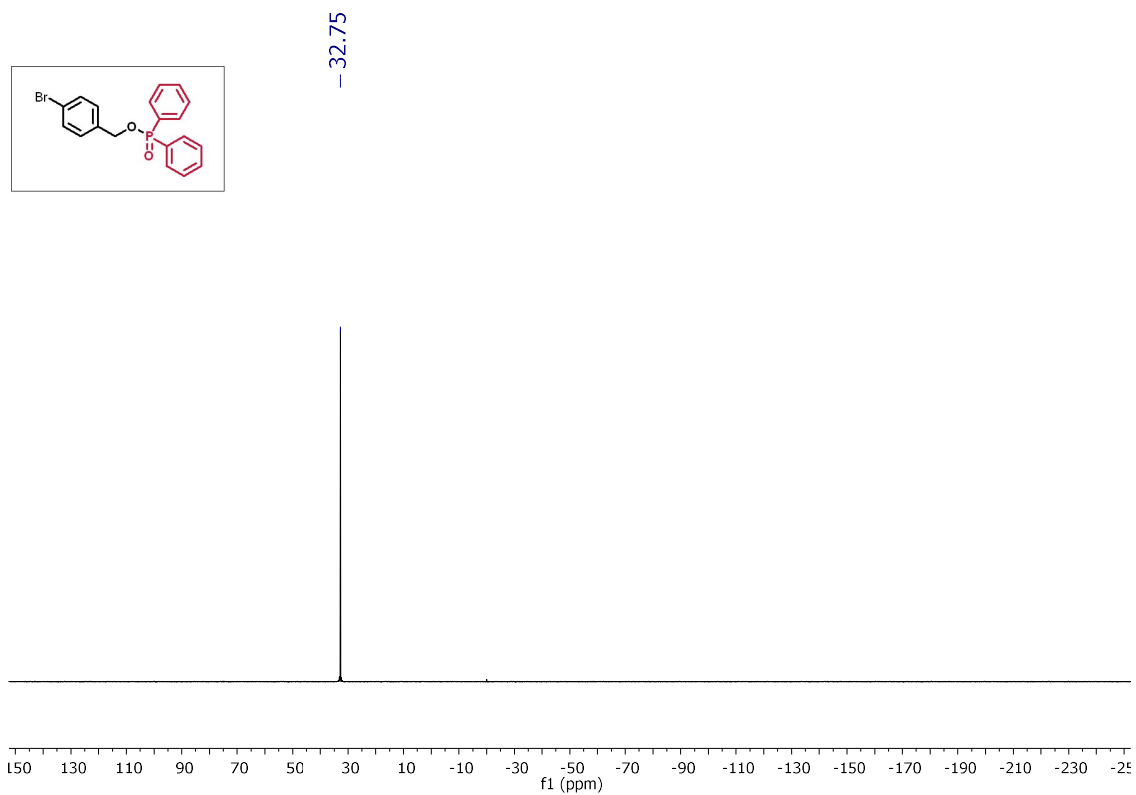

Figure S58.  $^1\text{H}$  NMR (500 MHz),  $^{13}\text{C}\{^1\text{H}\}$  NMR (125 MHz), and  $^{31}\text{P}\{^1\text{H}\}$  NMR (200 MHz) spectrum of Compound 4g in  $\text{CDCl}_3$

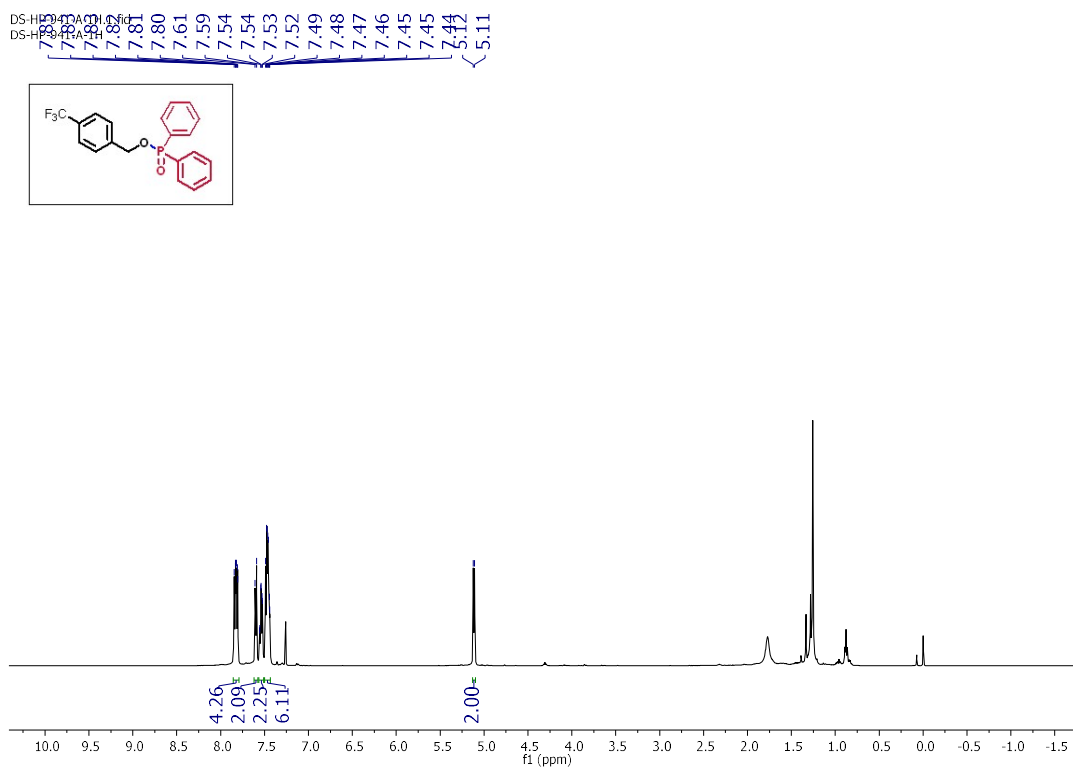

D5-HP-941-A-13C.3.fid  
D5-HP-941-A-13C

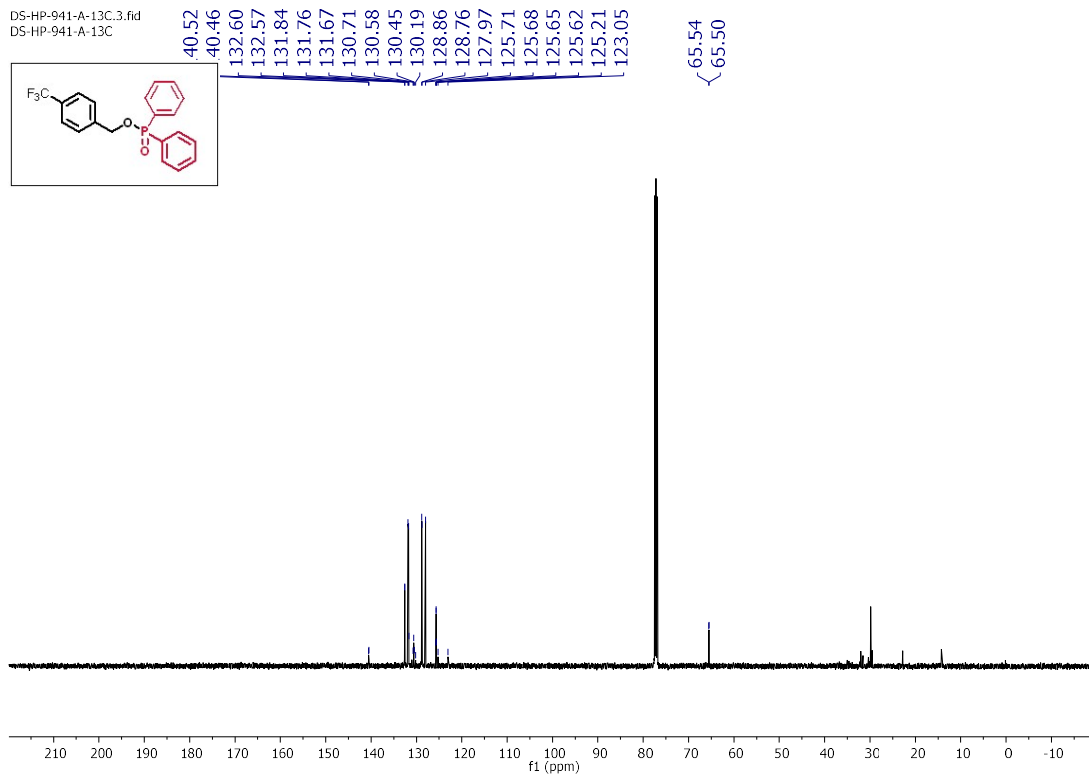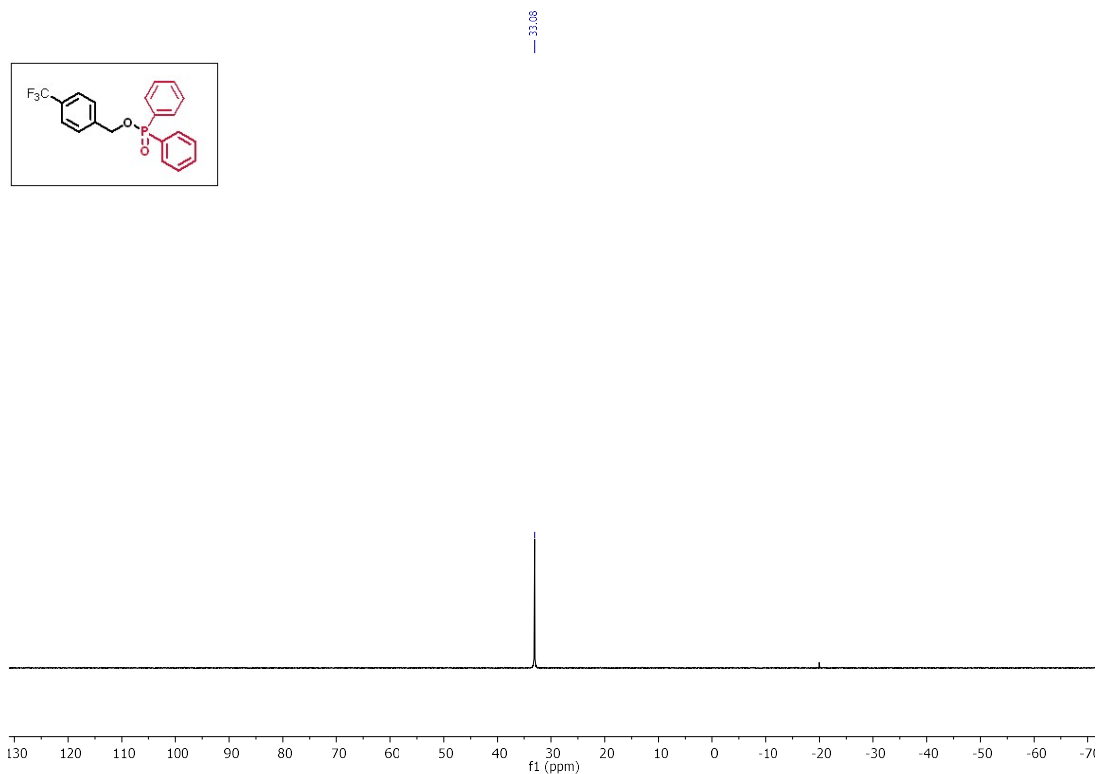

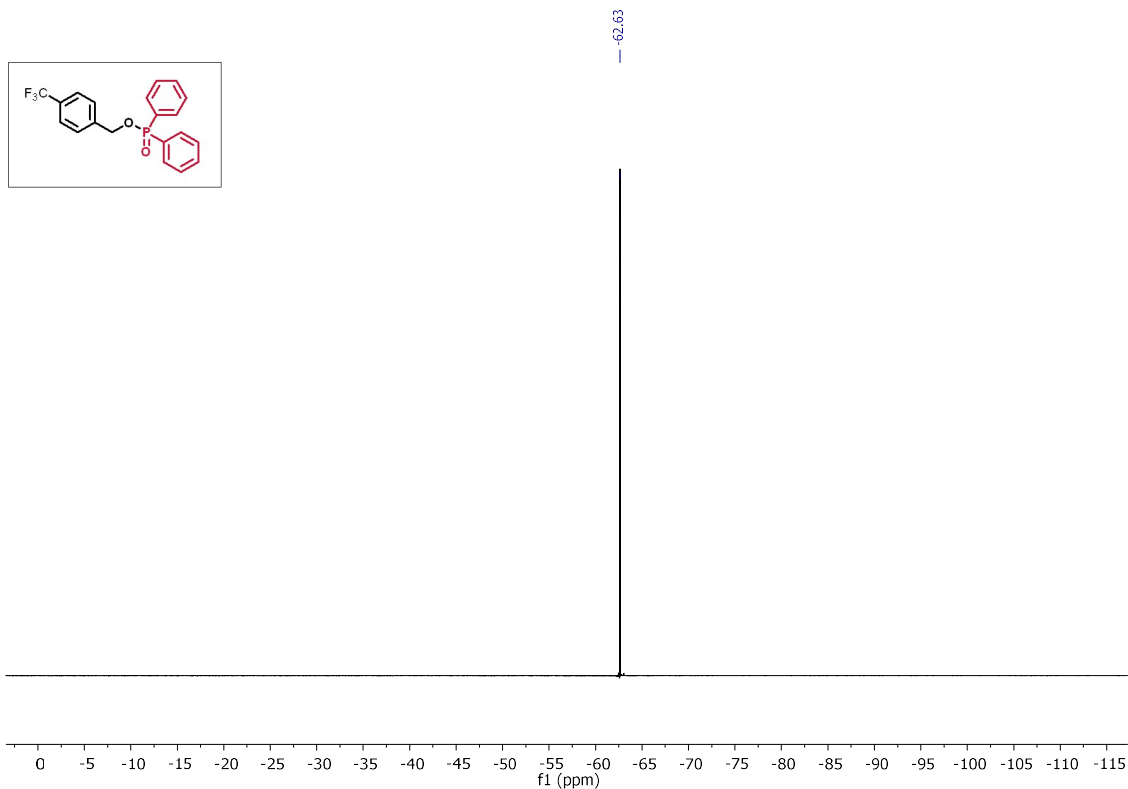

Figure S59.  $^1\text{H}$  NMR (500 MHz),  $^{13}\text{C}$   $\{^1\text{H}\}$  NMR (125 MHz), and  $^{31}\text{P}$   $\{^1\text{H}\}$  NMR (200 MHz)  $^{19}\text{F}$   $\{^1\text{H}\}$  NMR (402 MHz) spectrum of Compound 4h in  $\text{CDCl}_3$

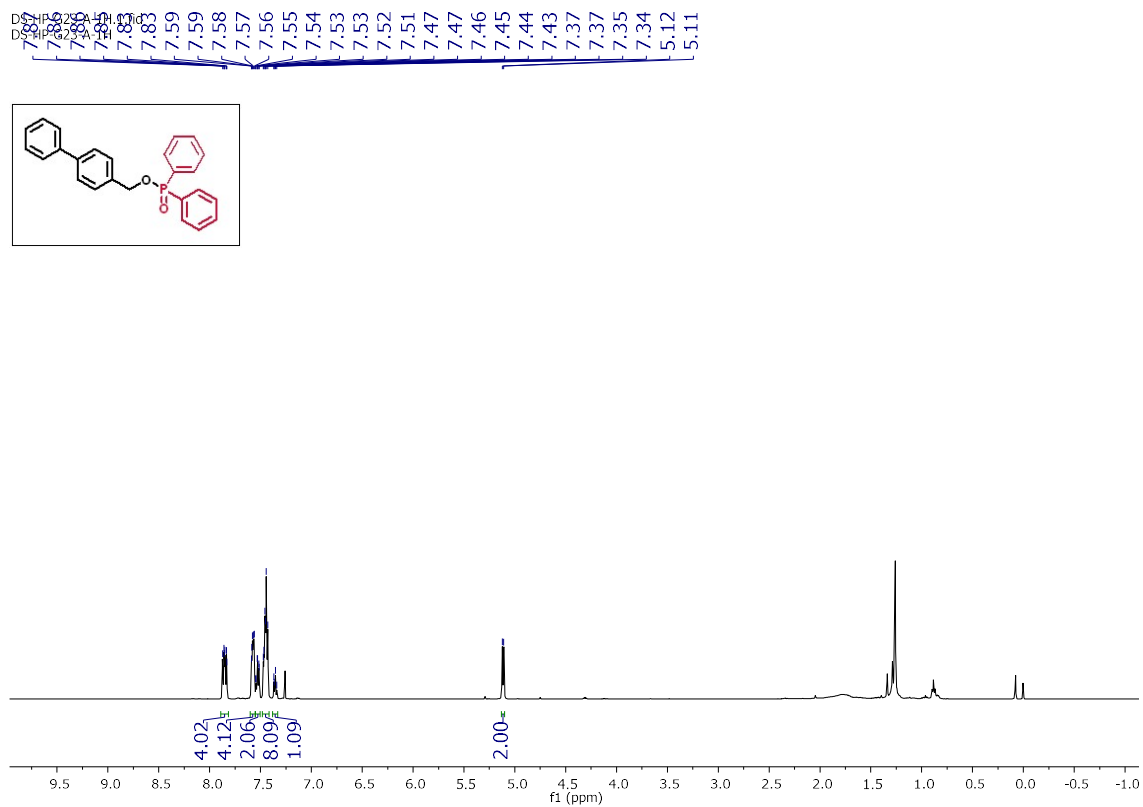

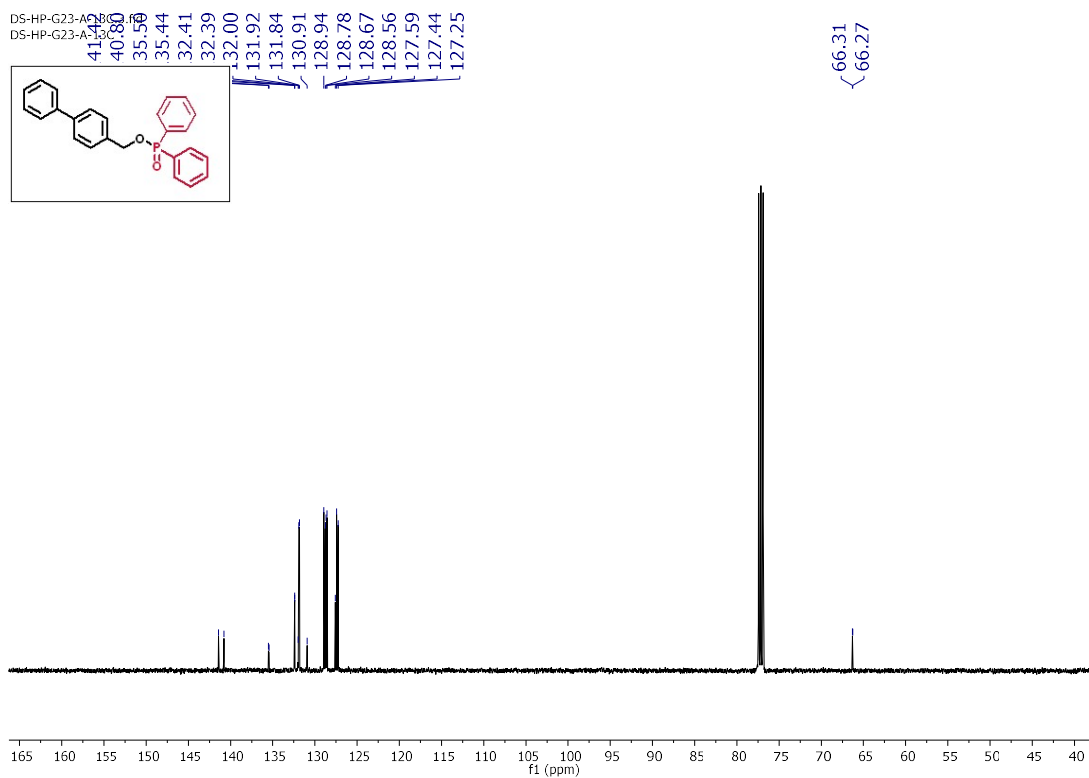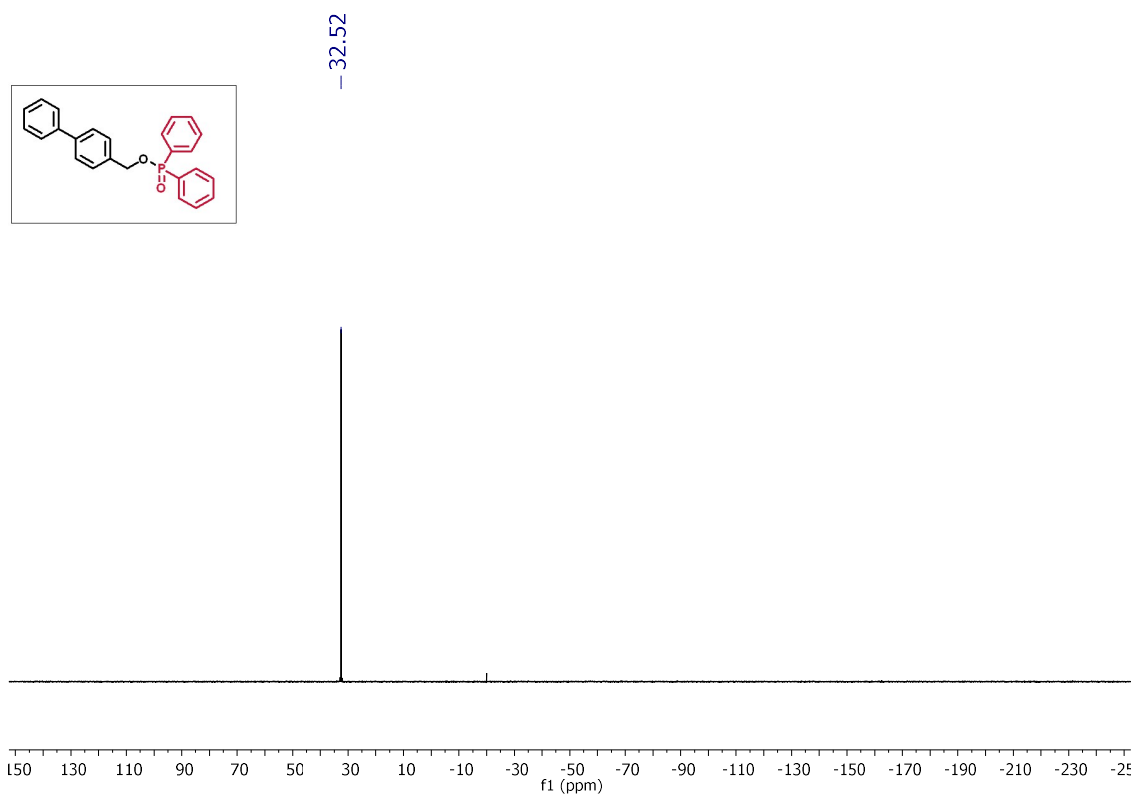

Figure S60.  $^1\text{H}$  NMR (500 MHz),  $^{13}\text{C}$   $\{^1\text{H}\}$  NMR (125 MHz), and  $^{31}\text{P}$   $\{^1\text{H}\}$  NMR (200 MHz) spectrum of Compound 4i in  $\text{CDCl}_3$

7.88  
7.88  
7.87  
7.86  
7.85  
7.85  
7.84  
7.84  
7.83  
7.82  
7.81  
7.81  
7.80  
7.80  
7.78  
7.78  
7.54  
7.53  
7.53  
7.52  
7.52  
7.50  
7.50  
7.49  
7.49  
7.48  
7.47  
7.47  
7.46  
7.45  
7.45  
7.44  
7.44  
7.43  
7.42  
7.42  
5.24  
5.22

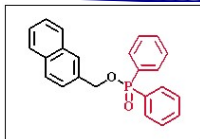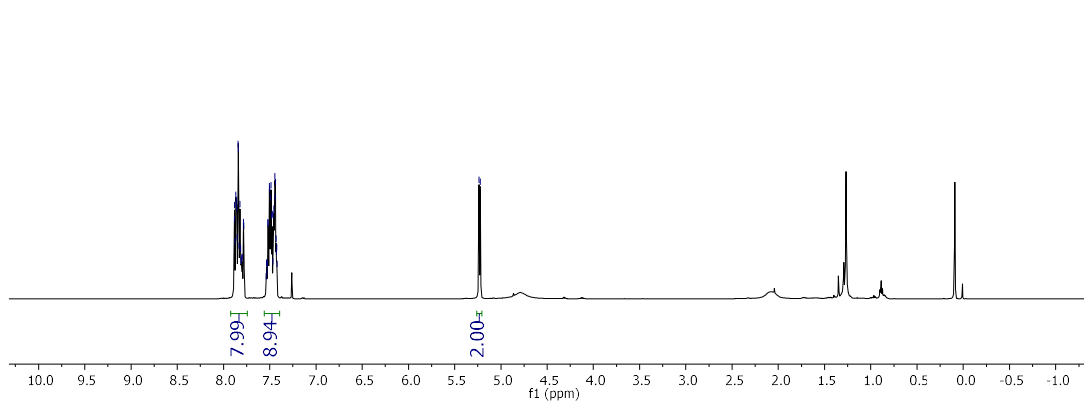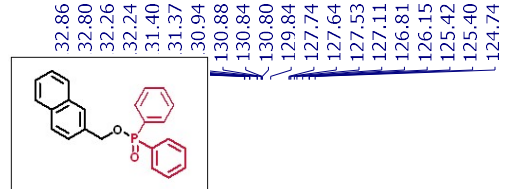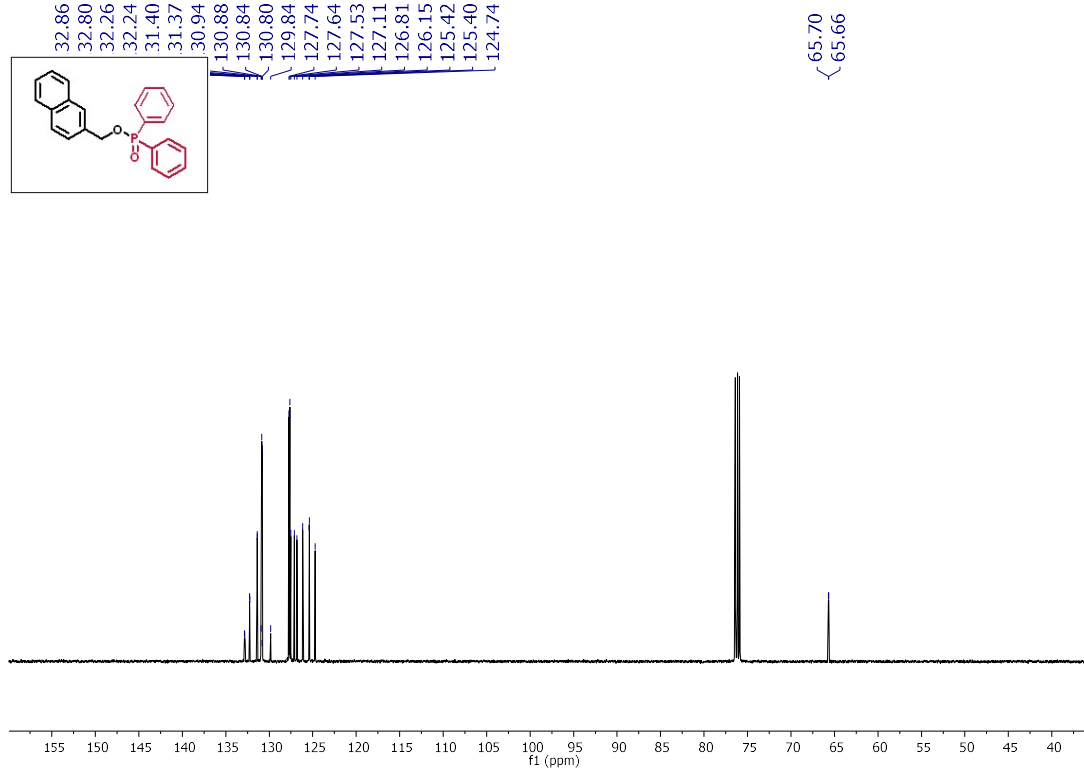

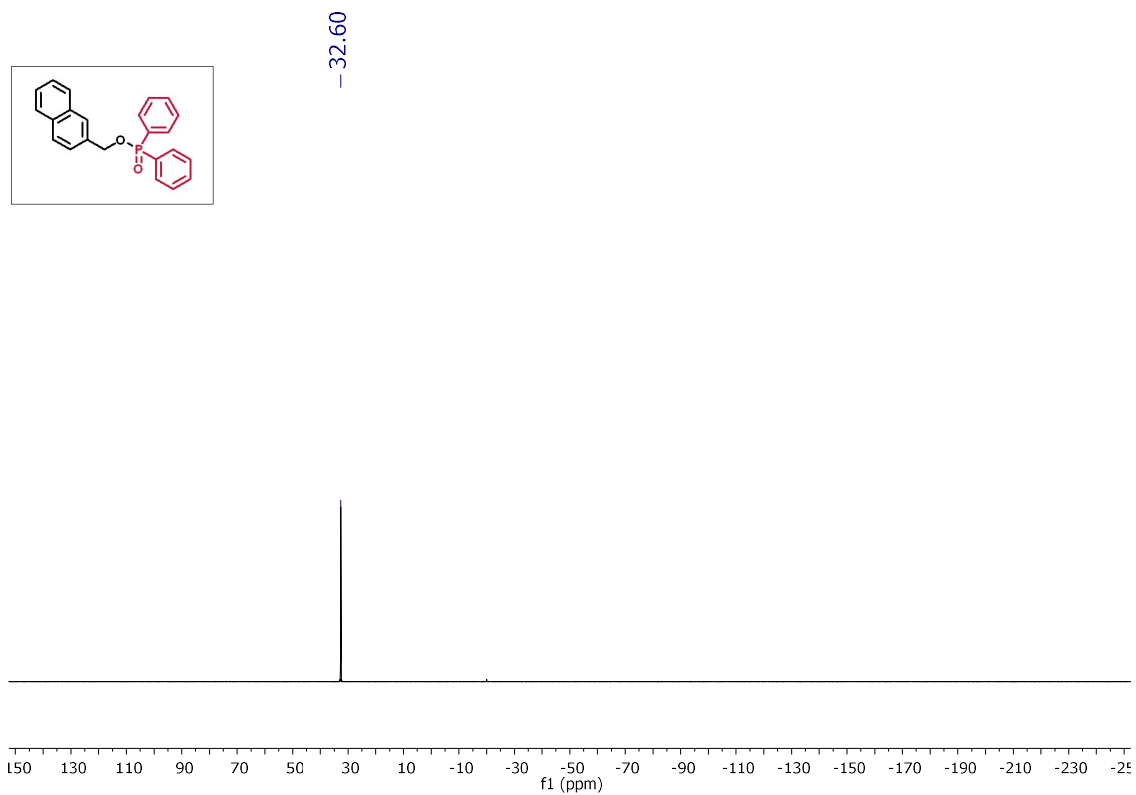

Figure S61.  $^1\text{H}$  NMR (500 MHz),  $^{13}\text{C}\{^1\text{H}\}$  NMR (125 MHz), and  $^{31}\text{P}\{^1\text{H}\}$  NMR (200 MHz) spectrum of Compound 4j in  $\text{CDCl}_3$

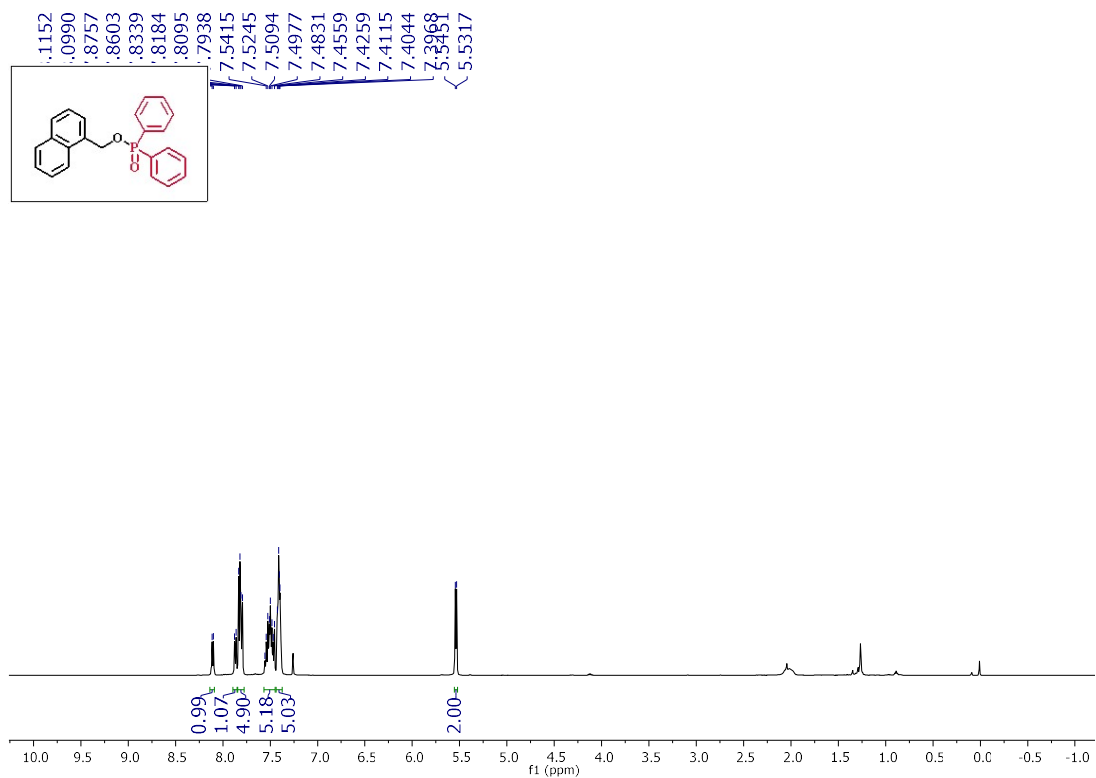

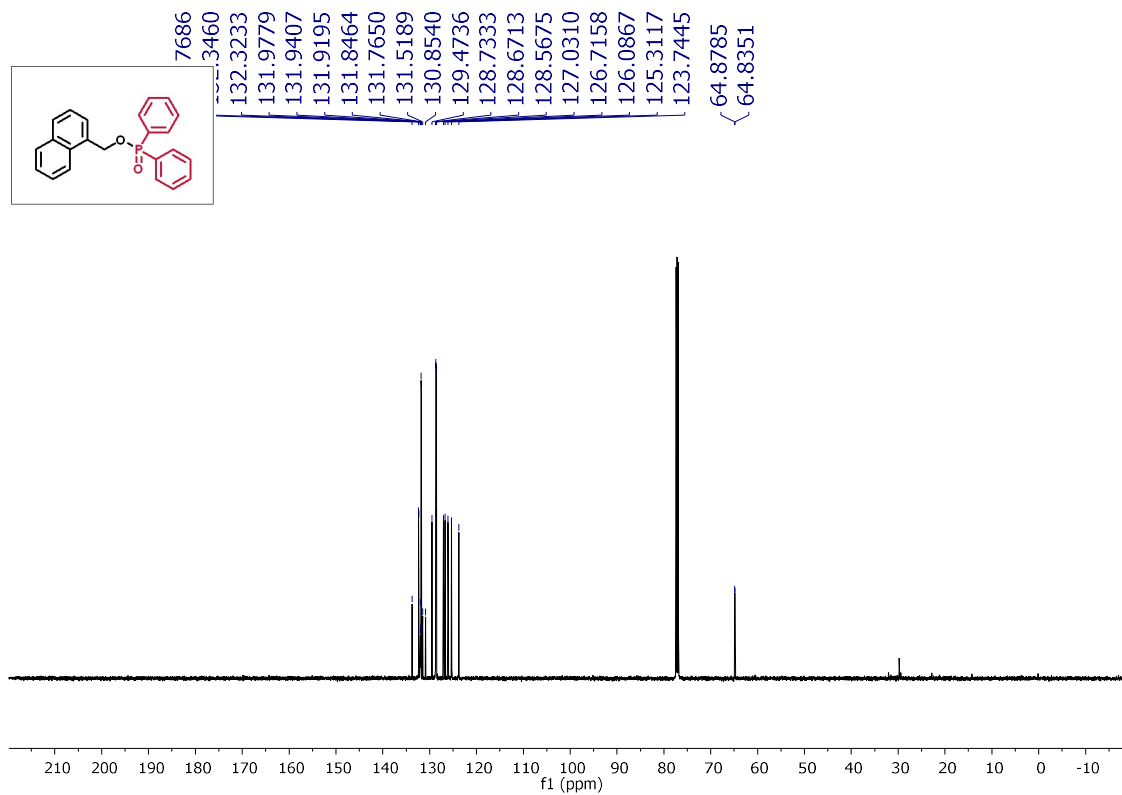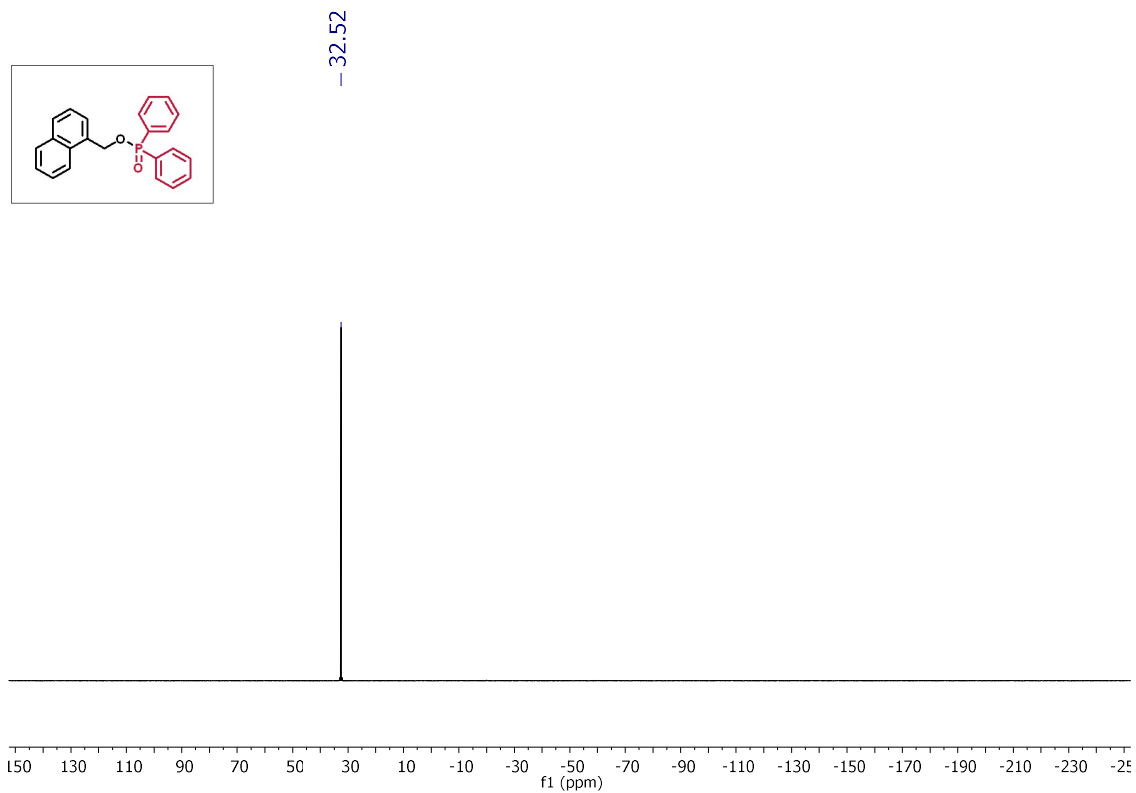

Figure S62.  $^1\text{H}$  NMR (500 MHz),  $^{13}\text{C}\{^1\text{H}\}$  NMR (125 MHz), and  $^{31}\text{P}\{^1\text{H}\}$  NMR (200 MHz) spectrum of Compound 4k in  $\text{CDCl}_3$

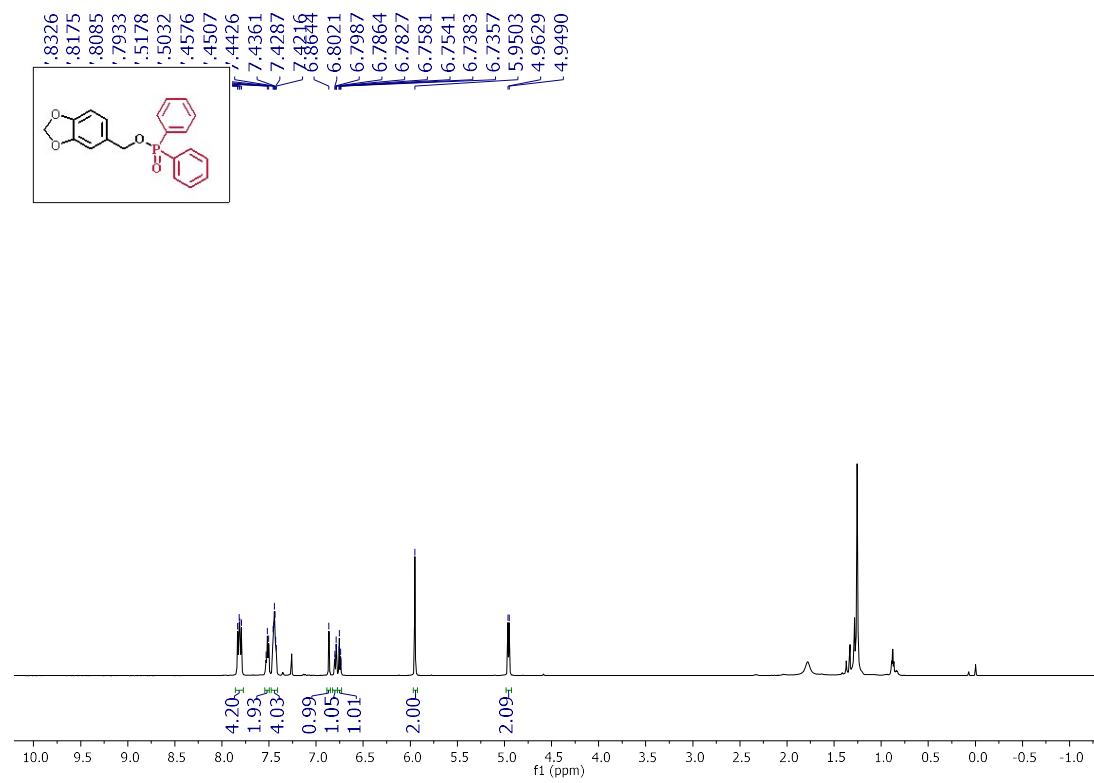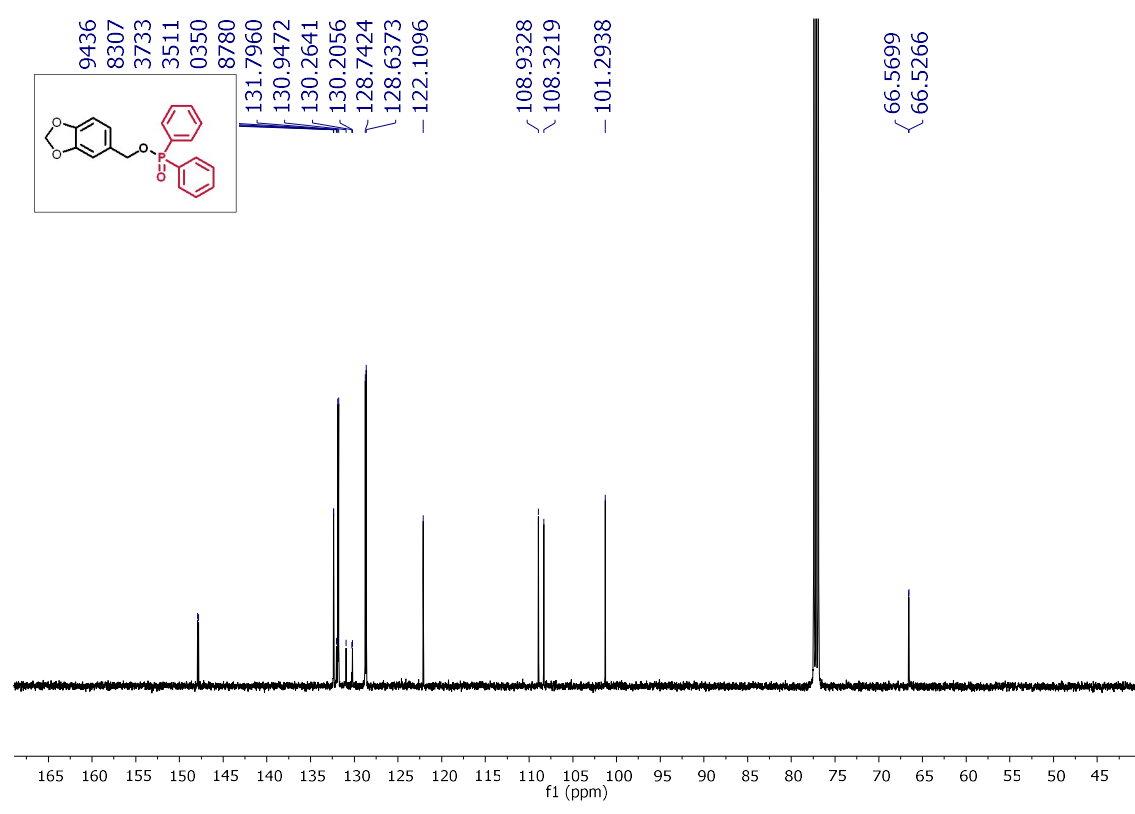

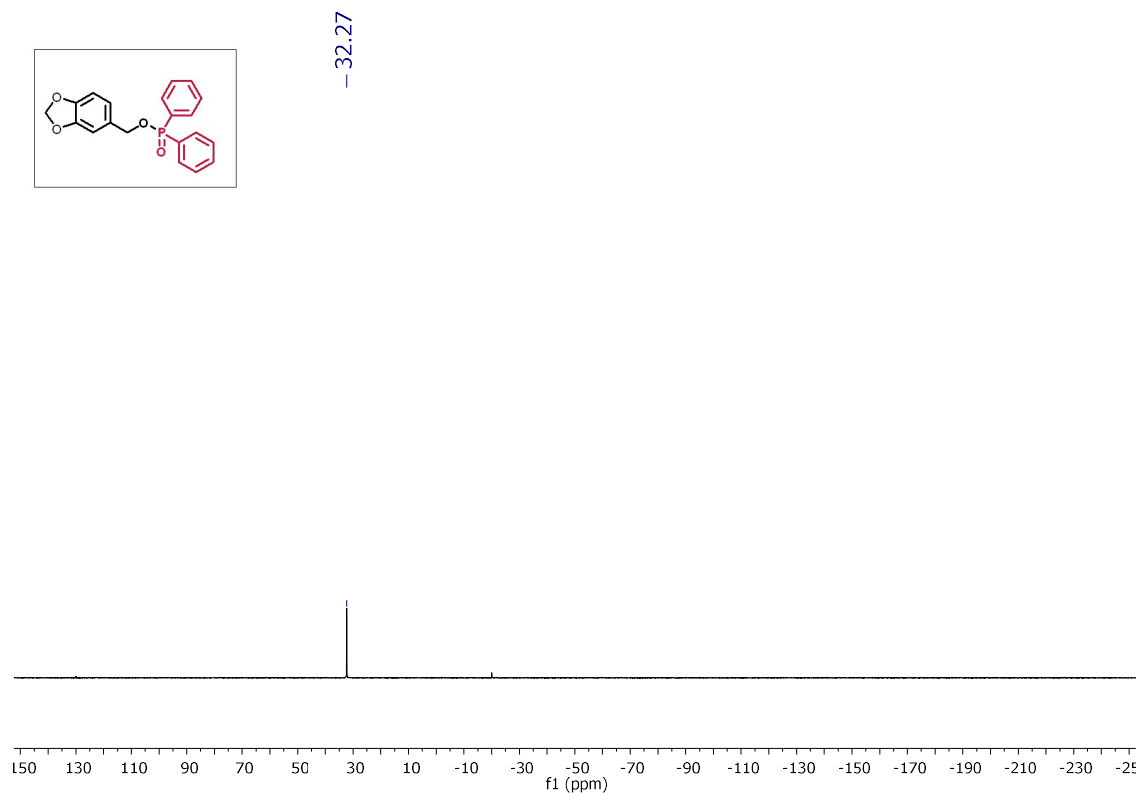

Figure S63.  $^1\text{H}$  NMR (500 MHz),  $^{13}\text{C}\{^1\text{H}\}$  NMR (125 MHz), and  $^{31}\text{P}\{^1\text{H}\}$  NMR (200 MHz) spectrum of Compound 4n in  $\text{CDCl}_3$

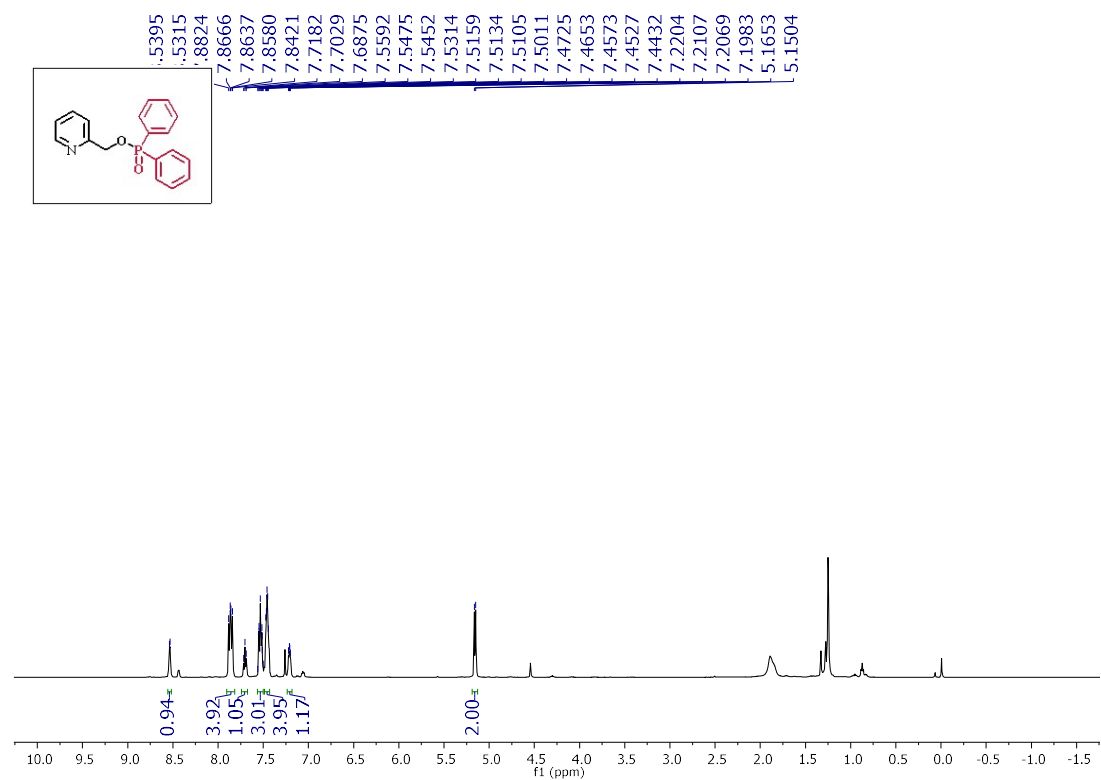

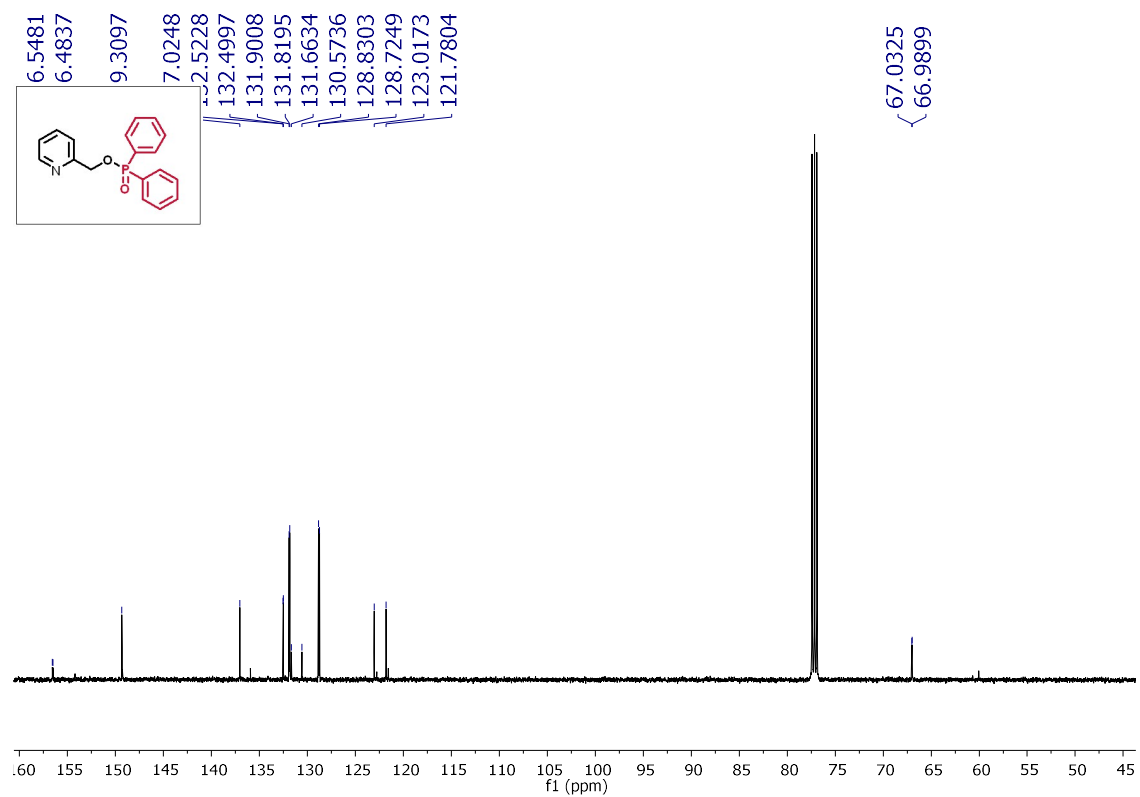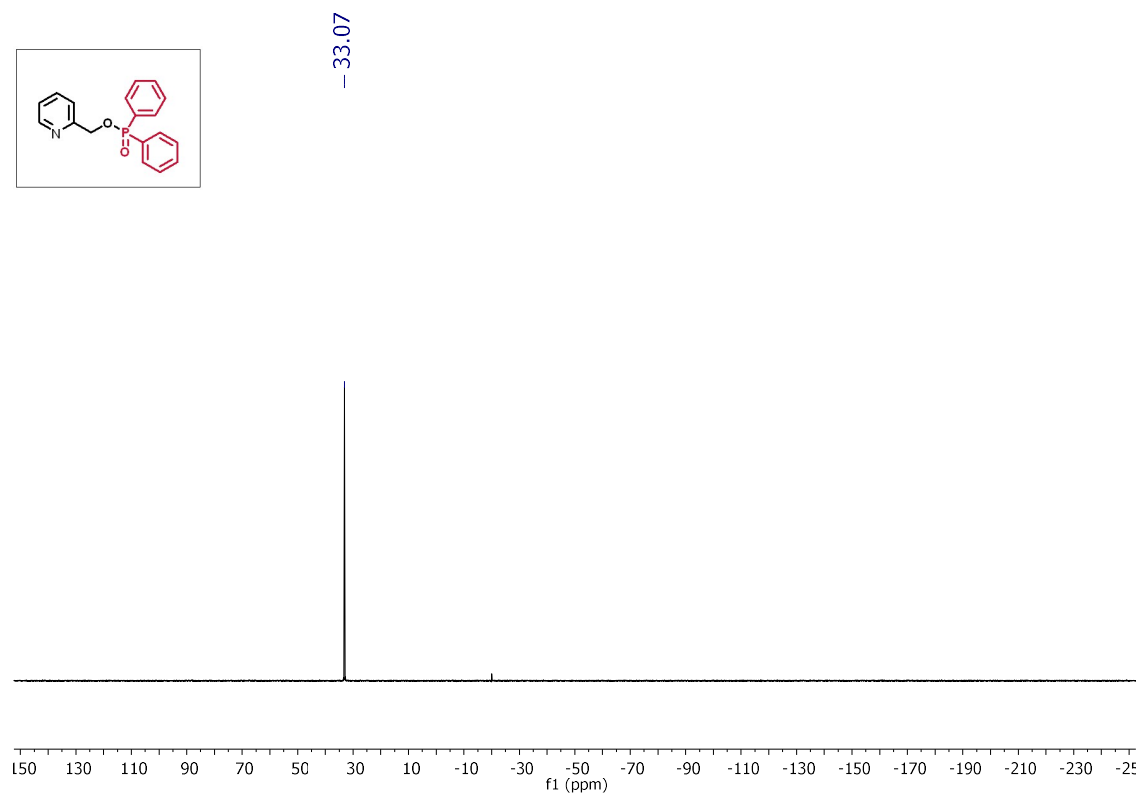

Figure S64.  $^1\text{H}$  NMR (500 MHz),  $^{13}\text{C}\{^1\text{H}\}$  NMR (125 MHz), and  $^{31}\text{P}\{^1\text{H}\}$  NMR (200 MHz) spectrum of Compound 4o in  $\text{CDCl}_3$

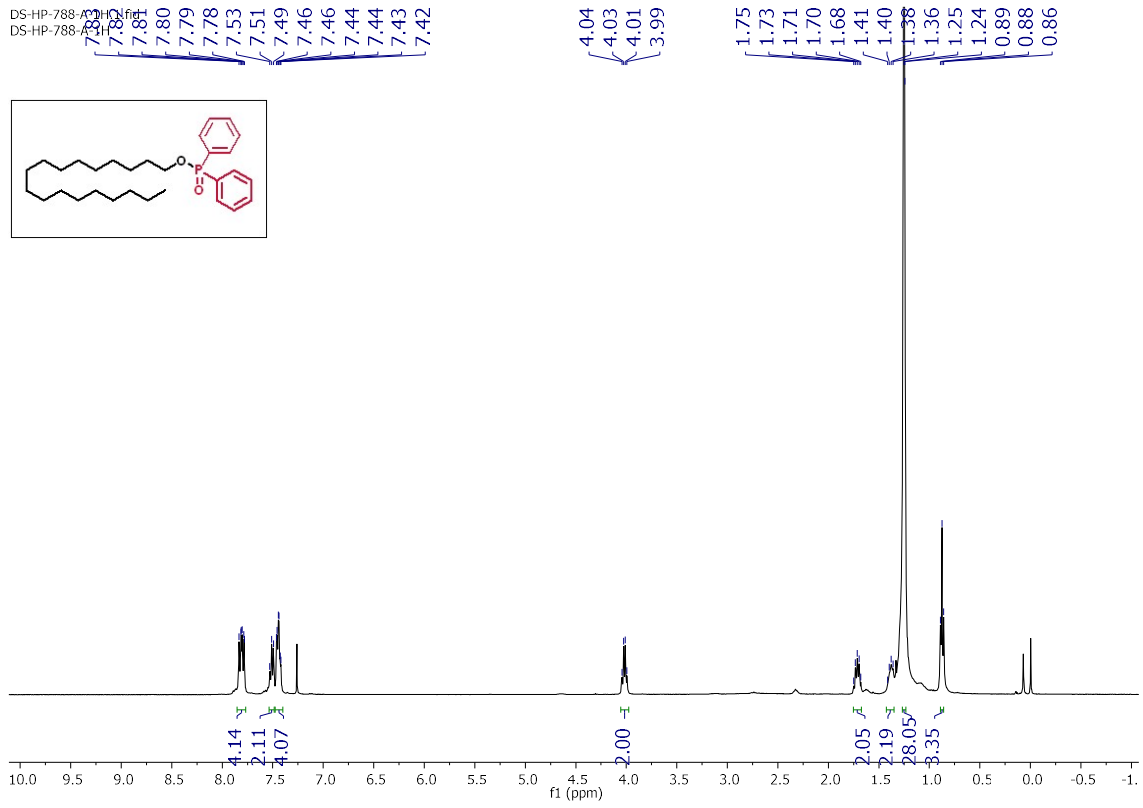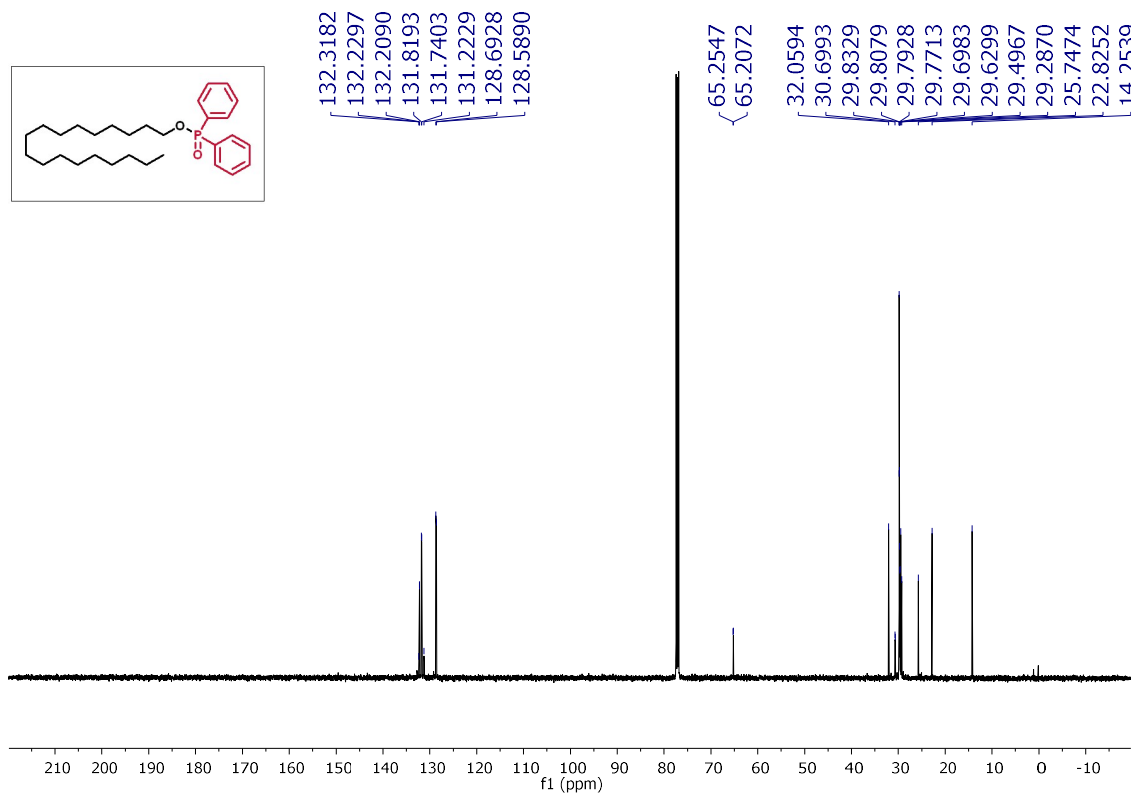

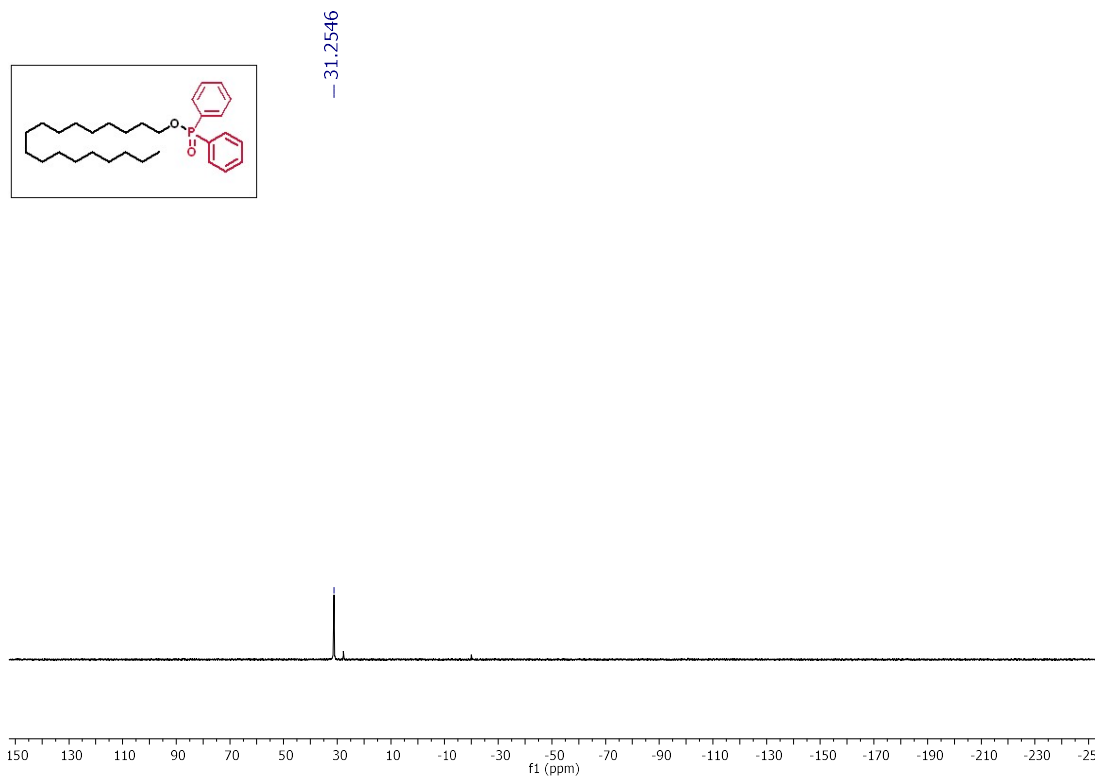

Figure S65.  $^1\text{H}$  NMR (500 MHz),  $^{13}\text{C}$   $\{^1\text{H}\}$  NMR (125 MHz), and  $^{31}\text{P}$   $\{^1\text{H}\}$  NMR (200 MHz) spectrum of Compound 4p in  $\text{CDCl}_3$

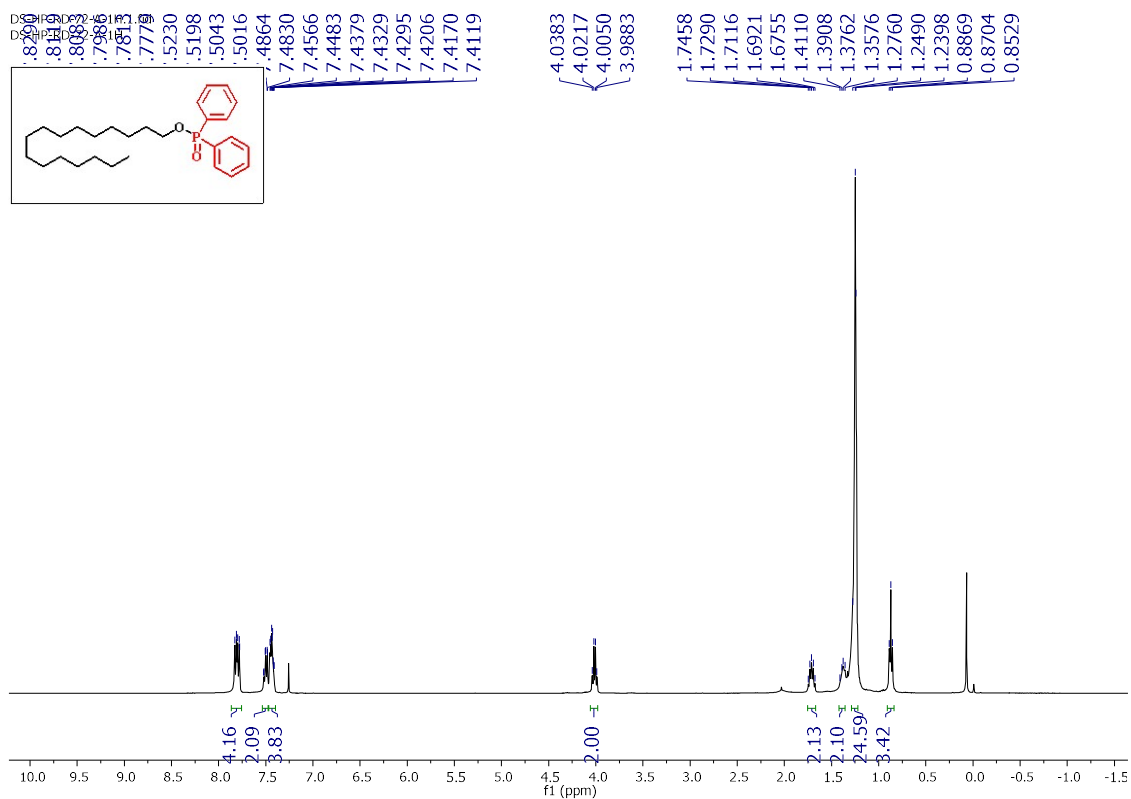

DS-HP-RD-72-A-13C.3.fid  
DS-HP-RD-72-A-13C

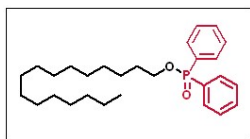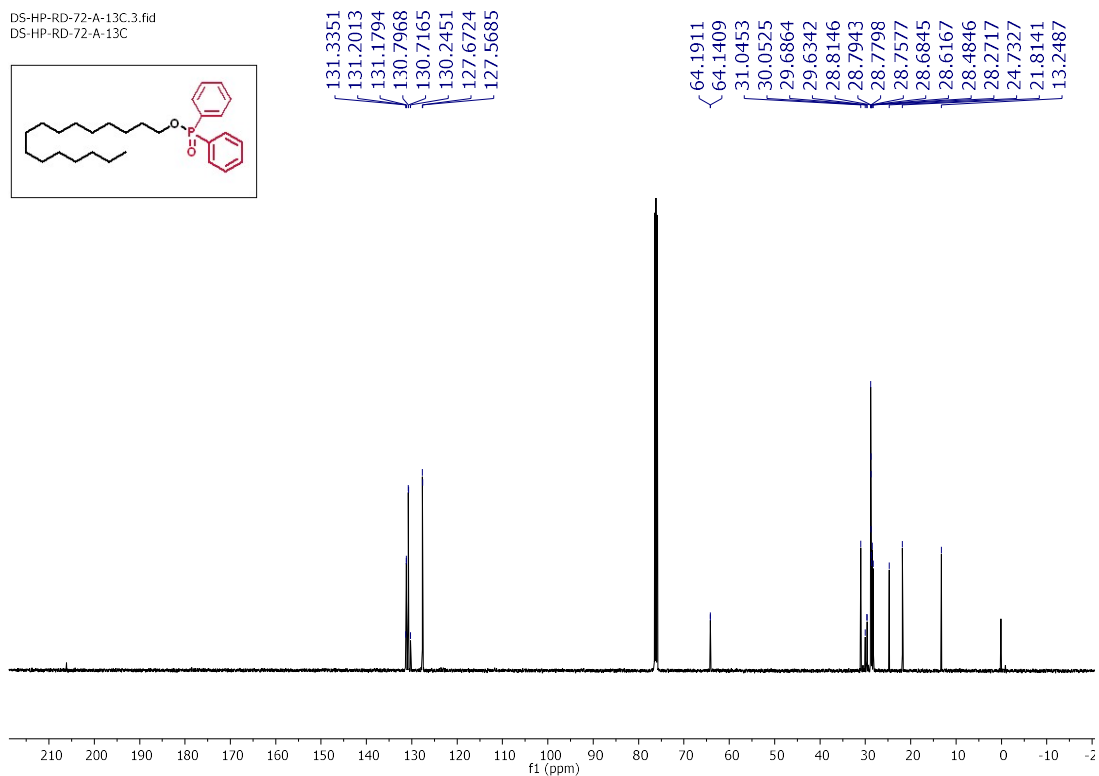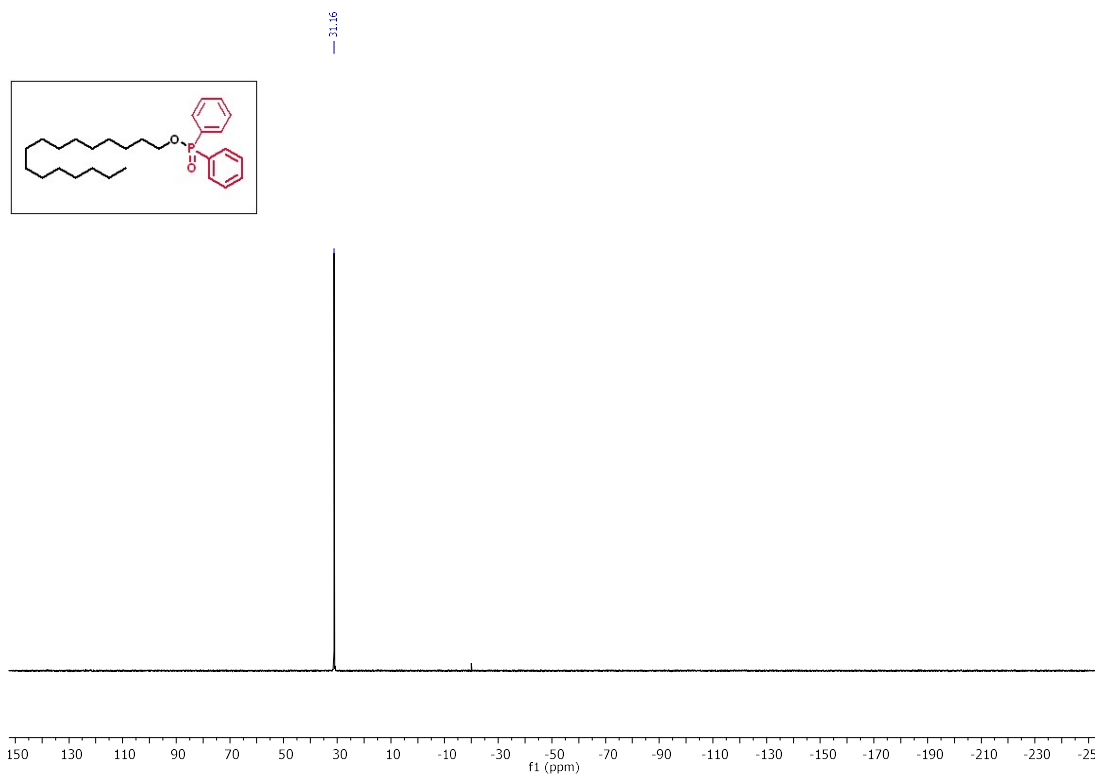

Figure S66.  $^1\text{H}$  NMR (500 MHz),  $^{13}\text{C}\{^1\text{H}\}$  NMR (125 MHz), and  $^{31}\text{P}\{^1\text{H}\}$  NMR (200 MHz) spectrum of Compound 4q in  $\text{CDCl}_3$

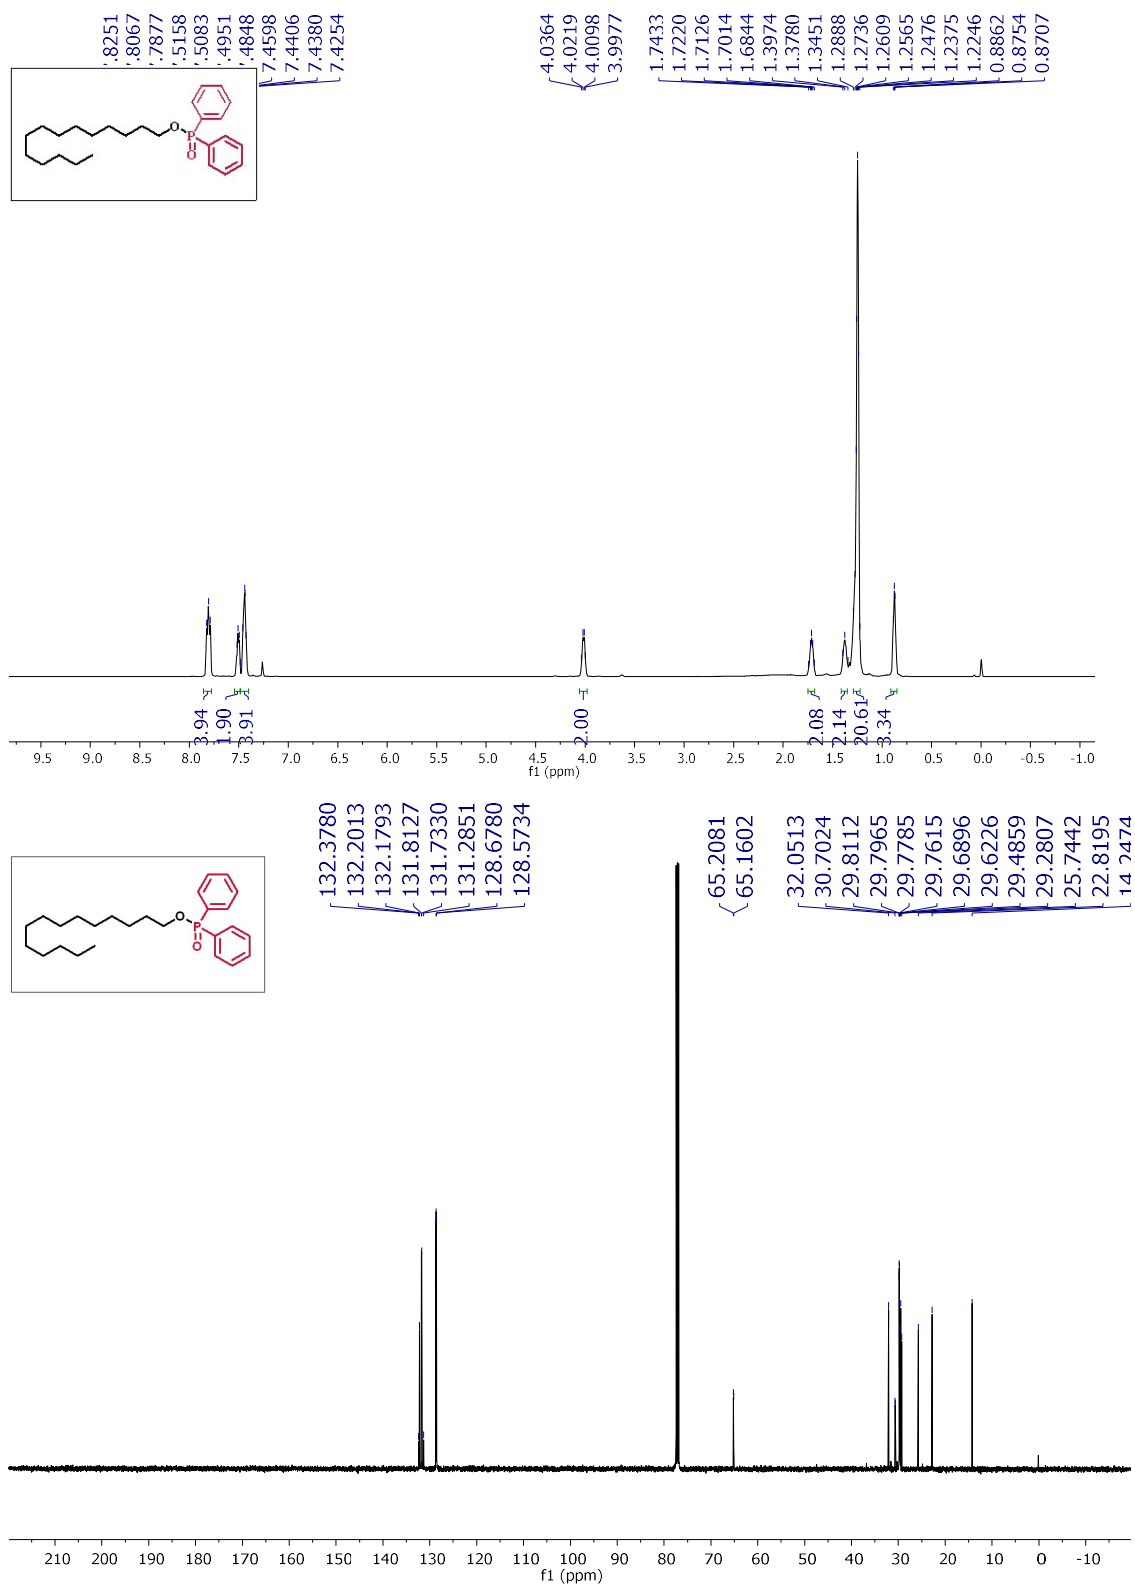

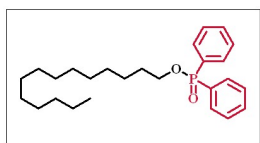

-31.1382

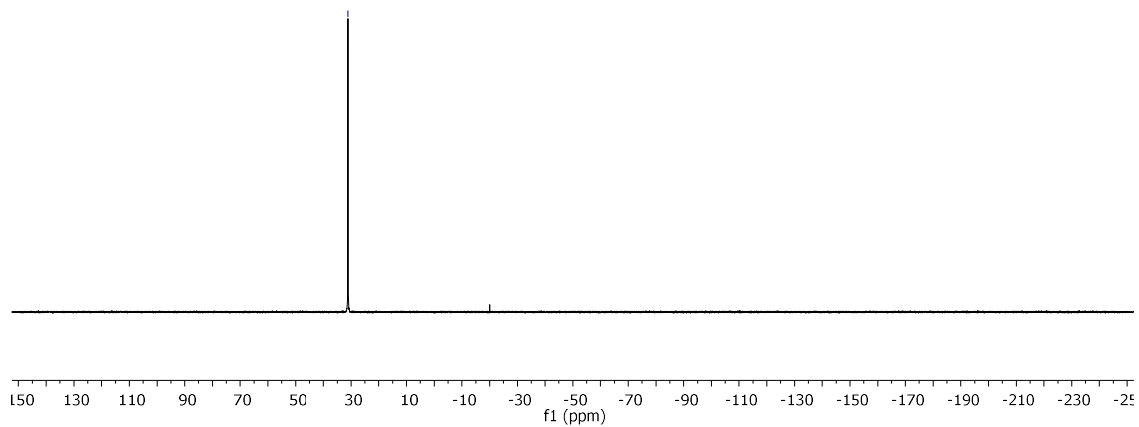

Figure S67.  $^1\text{H}$  NMR (500 MHz),  $^{13}\text{C}\{^1\text{H}\}$  NMR (125 MHz), and  $^{31}\text{P}\{^1\text{H}\}$  NMR (200 MHz) spectrum of Compound 4r in  $\text{CDCl}_3$

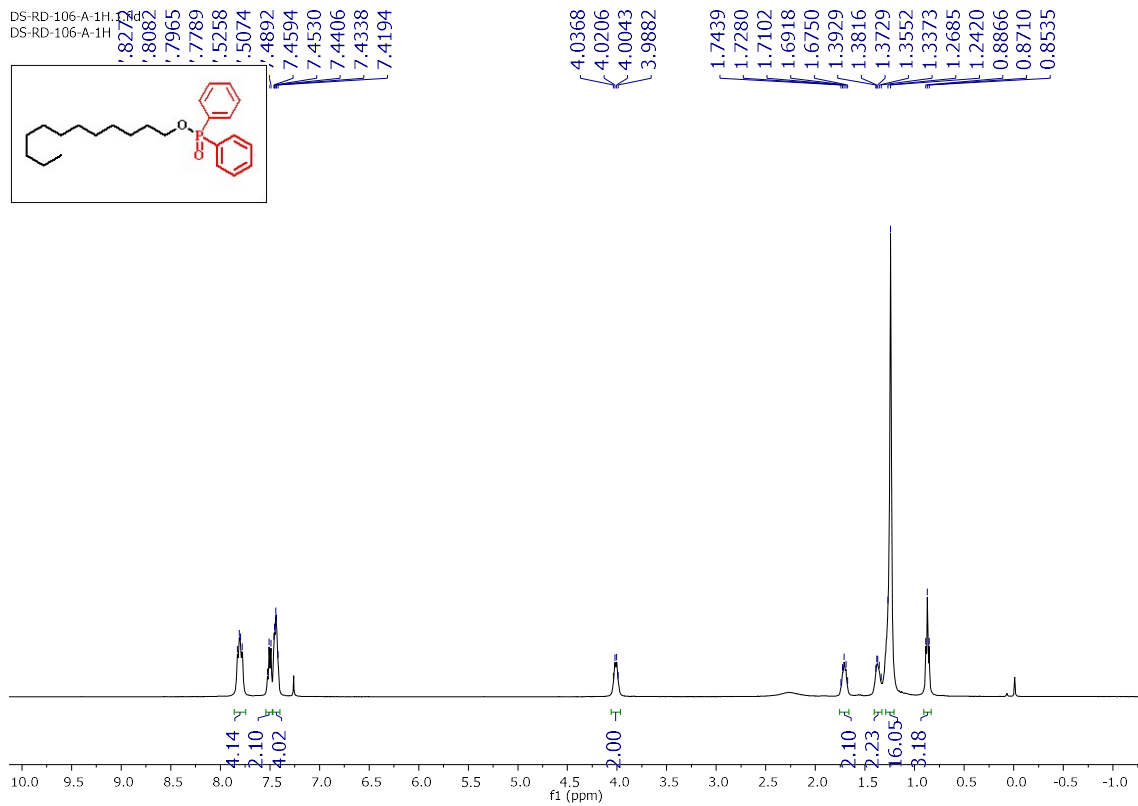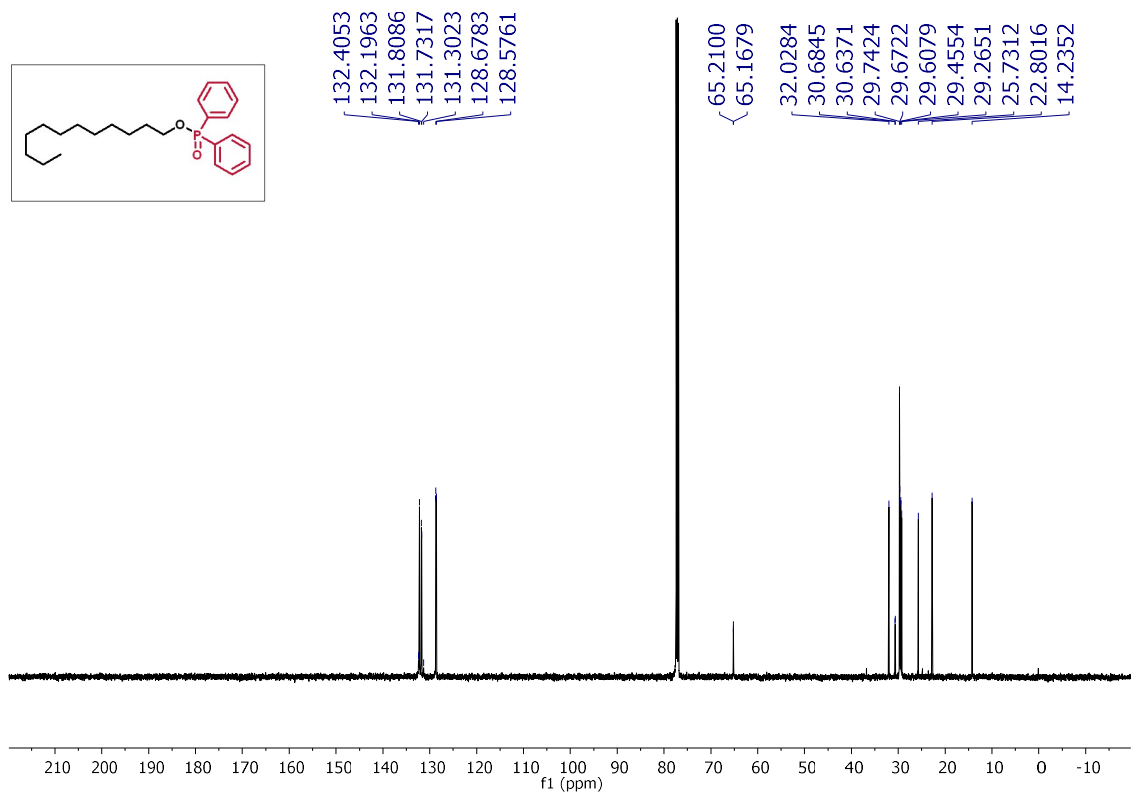

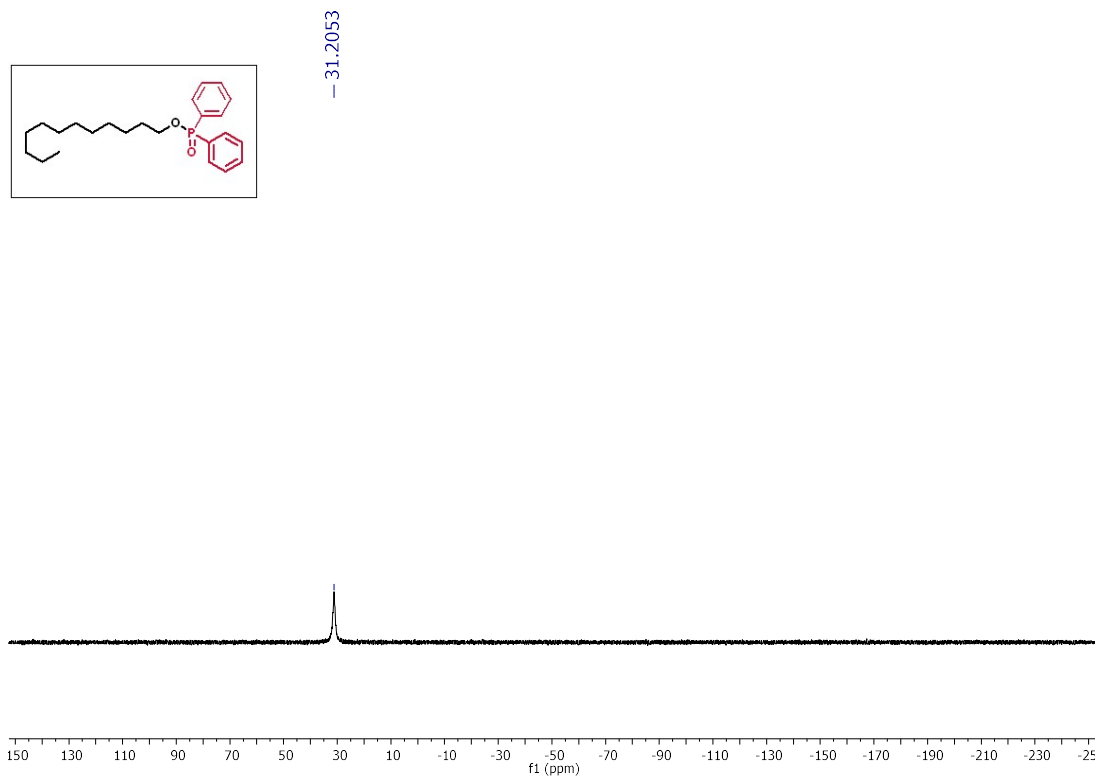

Figure S68.  $^1\text{H}$  NMR (500 MHz),  $^{13}\text{C}$   $\{^1\text{H}\}$  NMR (125 MHz), and  $^{31}\text{P}$   $\{^1\text{H}\}$  NMR (200 MHz) spectrum of Compound 4s in  $\text{CDCl}_3$

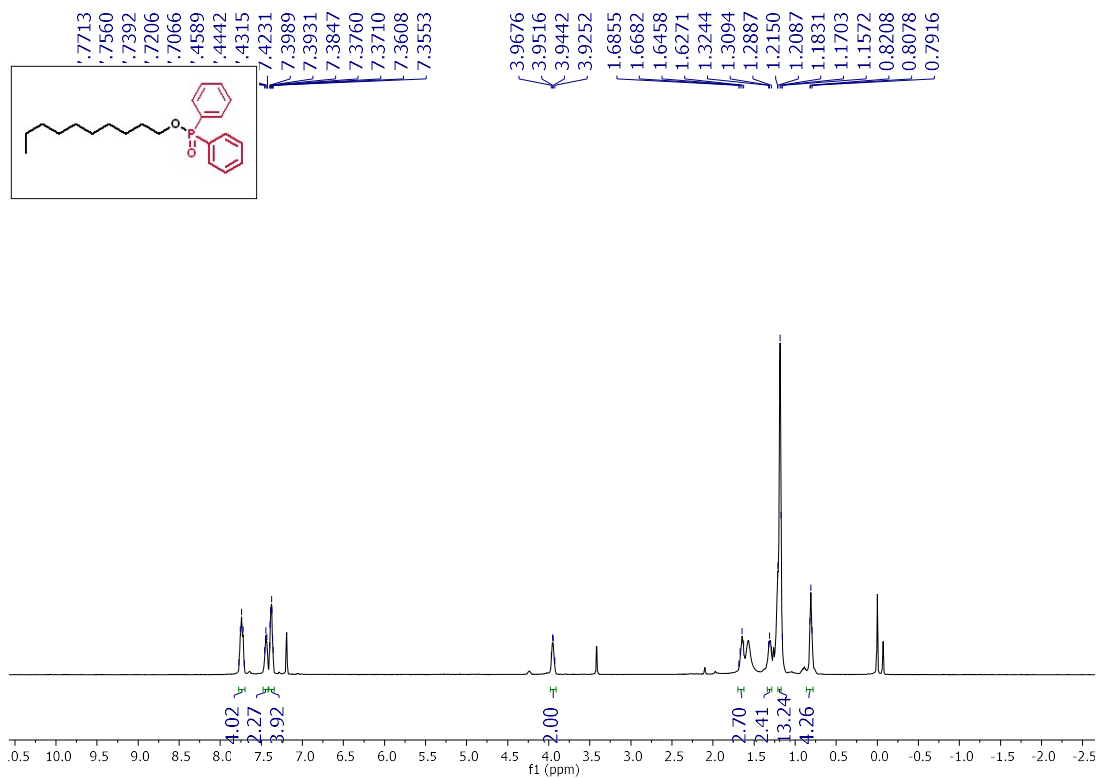

DS-HP-700A-13C.3.fid  
DS-HP-700A-13C

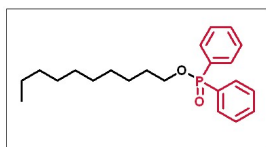

132.3574  
132.1571  
132.1347  
131.7690  
131.6886  
131.2685  
128.6366  
128.5315

77.4137  
77.1606  
76.9049  
65.1488  
65.1002

31.9695  
30.6628  
30.6104  
29.5957  
29.5751  
29.3717  
29.2294  
25.7019  
22.7573  
14.2019

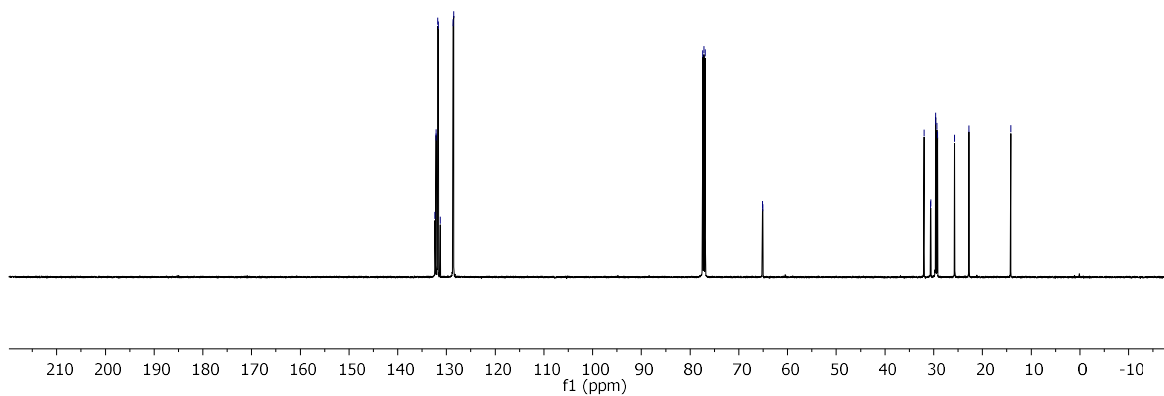

DS-HP-700A-31P.5.fid  
DS-HP-700A-31P

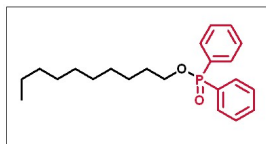

-31.09

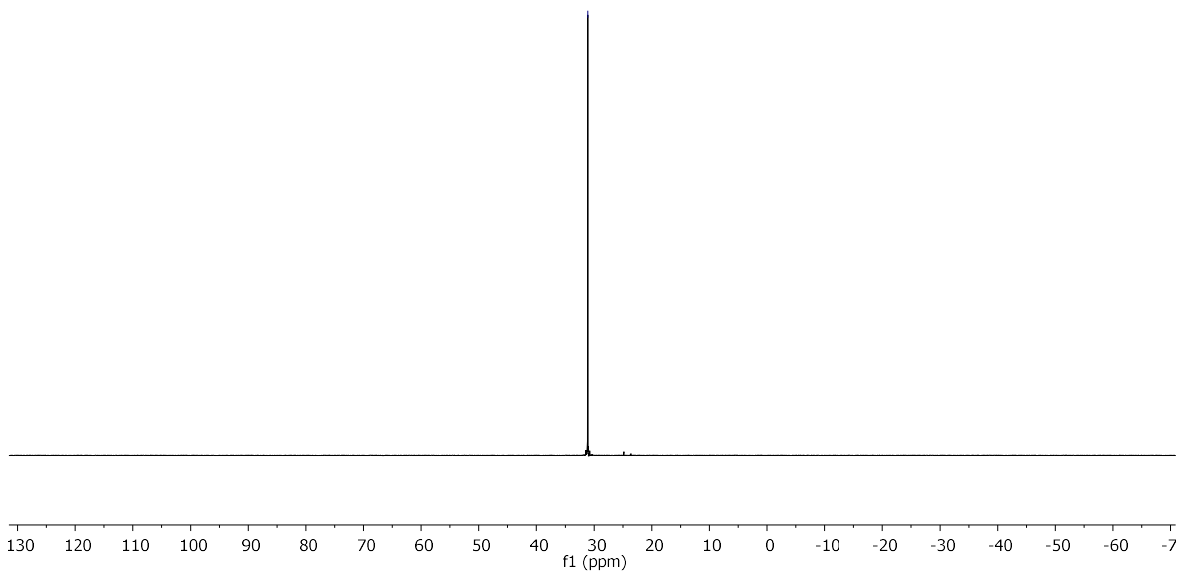

Figure S69.  $^1\text{H}$  NMR (500 MHz),  $^{13}\text{C}\{^1\text{H}\}$  NMR (125 MHz), and  $^{31}\text{P}\{^1\text{H}\}$  NMR (200 MHz) spectrum of Compound 4t in  $\text{CDCl}_3$

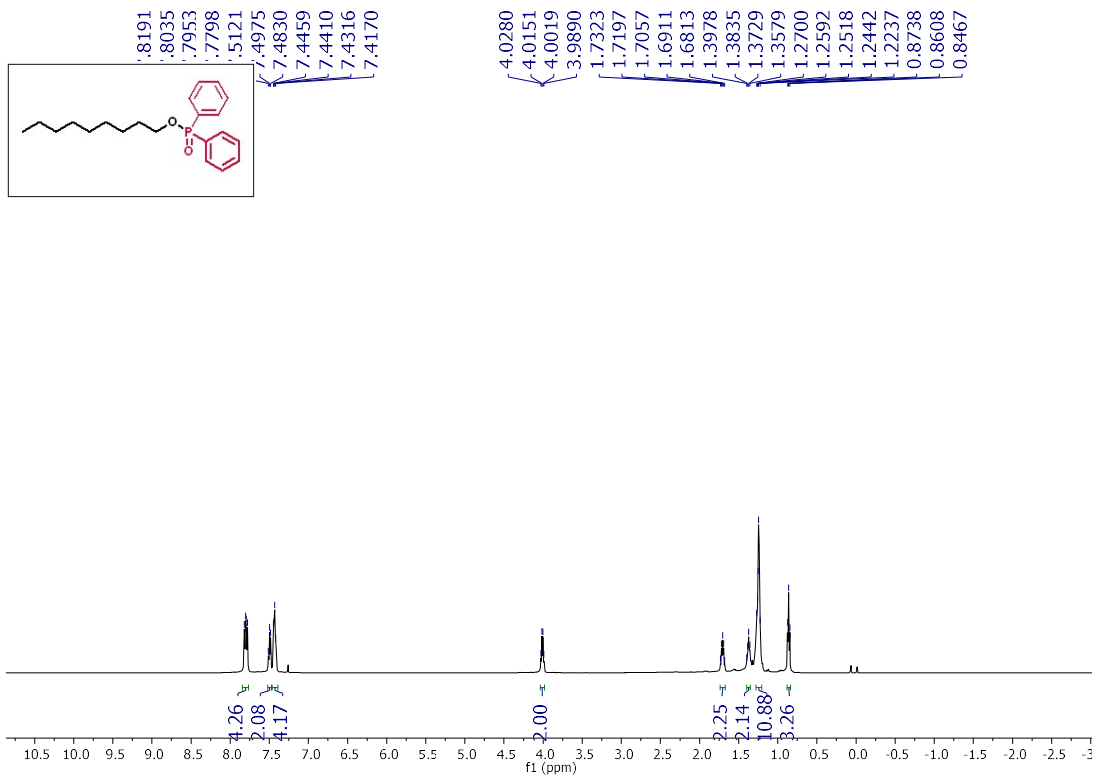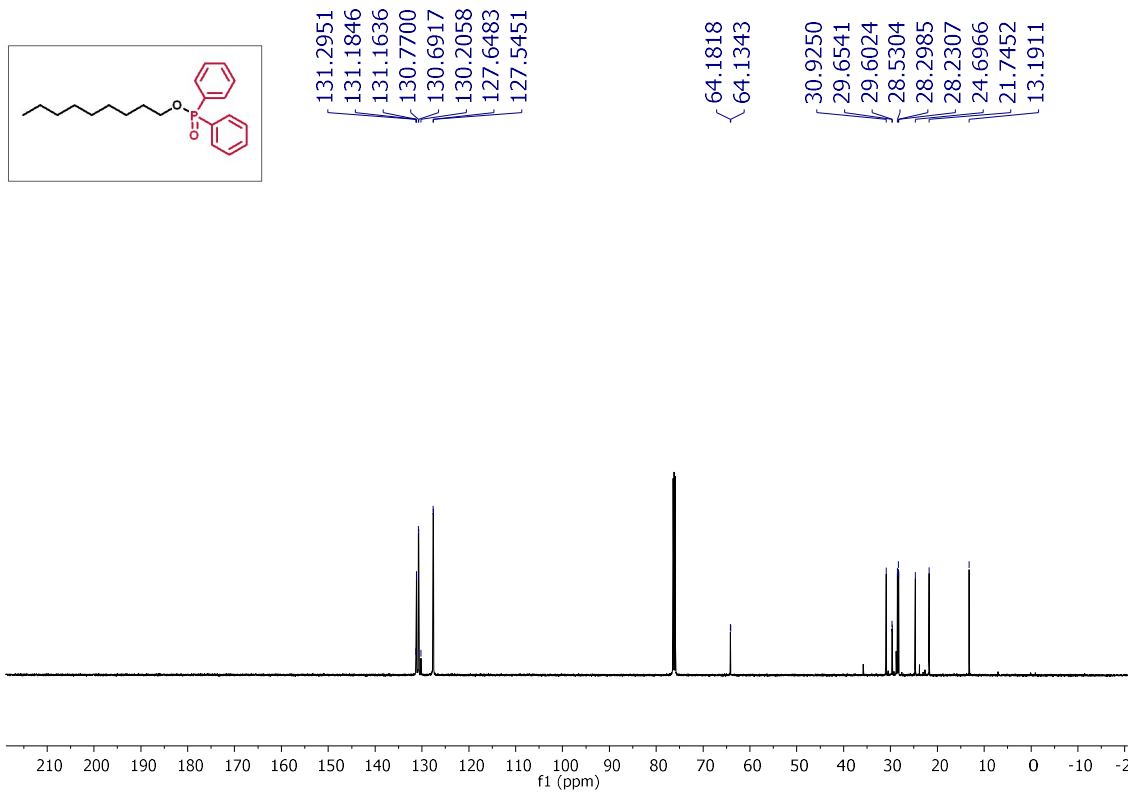

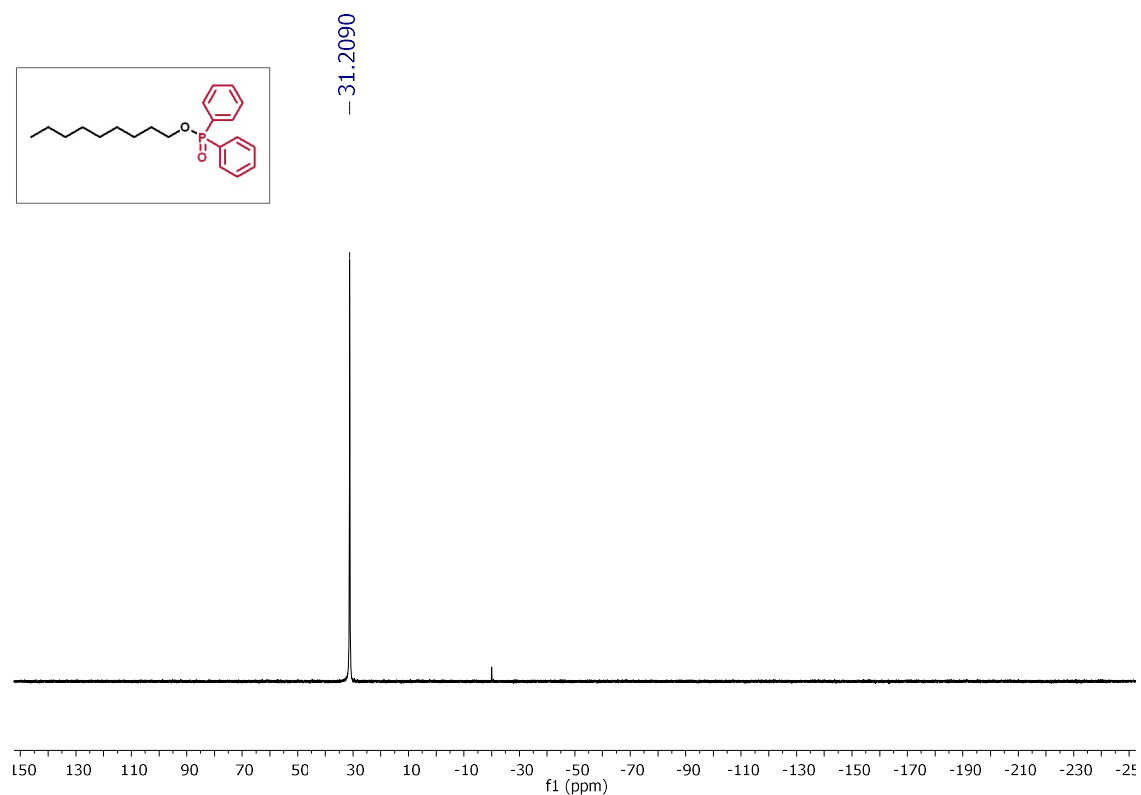

Figure S70.  $^1\text{H}$  NMR (500 MHz),  $^{13}\text{C}\{^1\text{H}\}$  NMR (125 MHz), and  $^{31}\text{P}\{^1\text{H}\}$  NMR (200 MHz) spectrum of Compound 4u in  $\text{CDCl}_3$

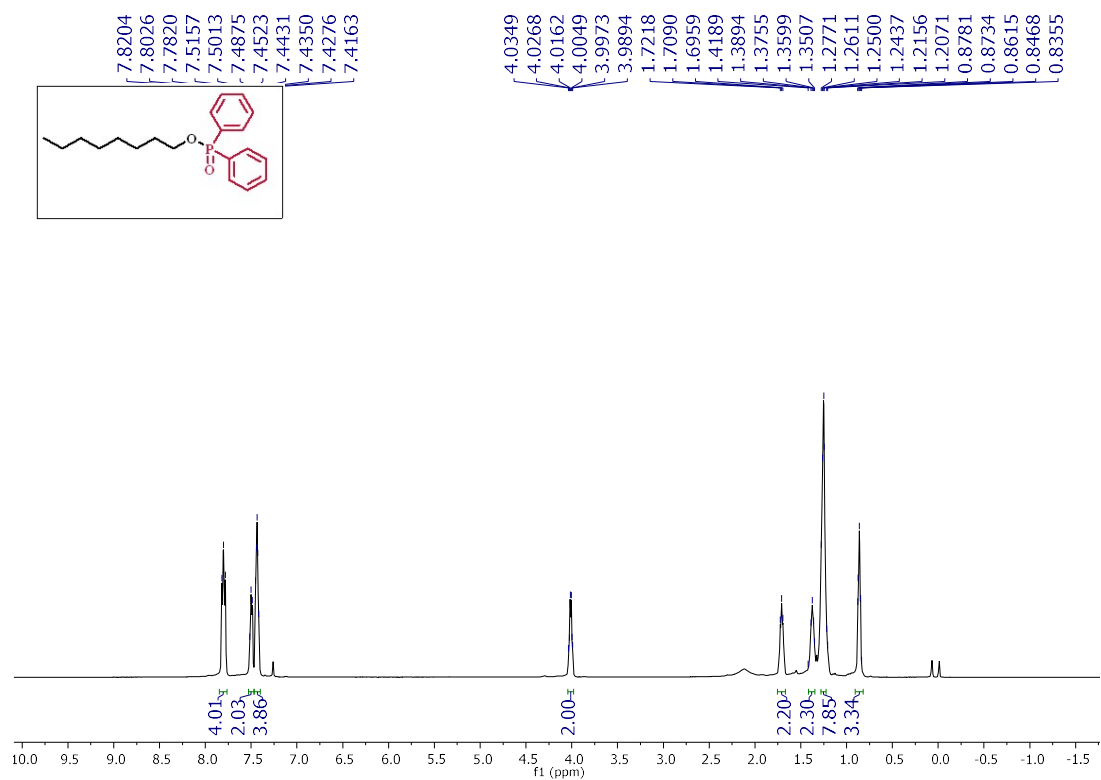

DS-HP-108-A-13C.3.fid  
DS-HP-108-A-13C

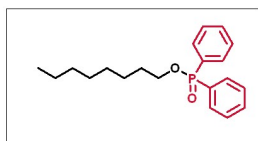

132.3257  
132.1934  
132.1716  
131.7819  
131.7018  
131.2355  
128.6623  
128.5582

65.1970  
65.1491

31.8610  
30.6699  
30.6174  
29.2448  
29.2023  
25.7145  
22.7211  
14.1835

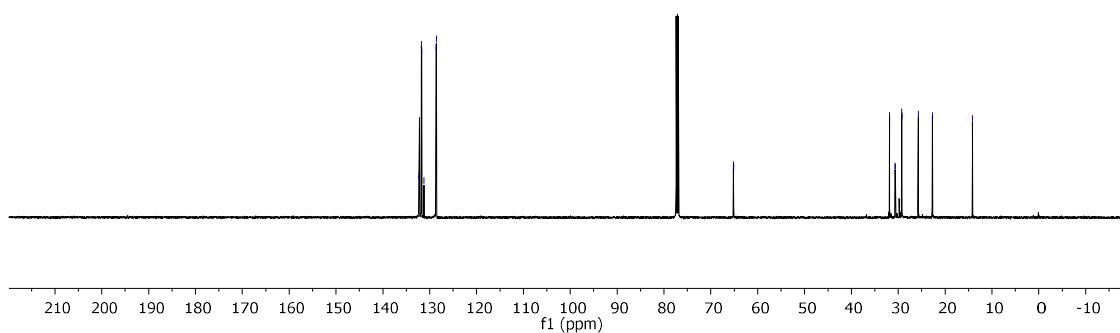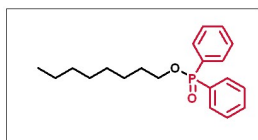

31.1845

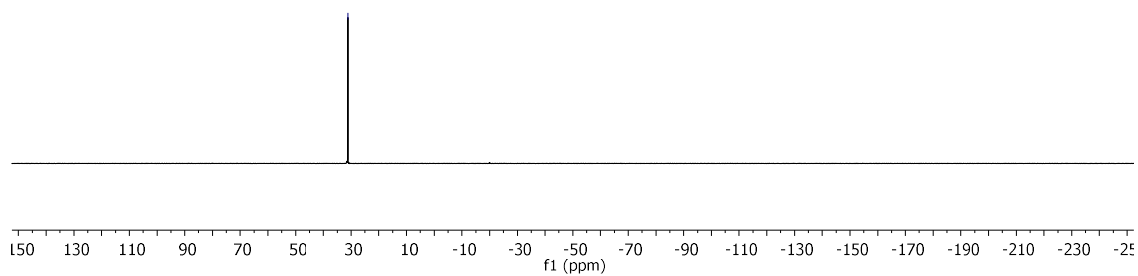

Figure S71.  $^1\text{H}$  NMR (500 MHz),  $^{13}\text{C}\{^1\text{H}\}$  NMR (125 MHz), and  $^{31}\text{P}\{^1\text{H}\}$  NMR (200 MHz) spectrum of Compound 4v in  $\text{CDCl}_3$

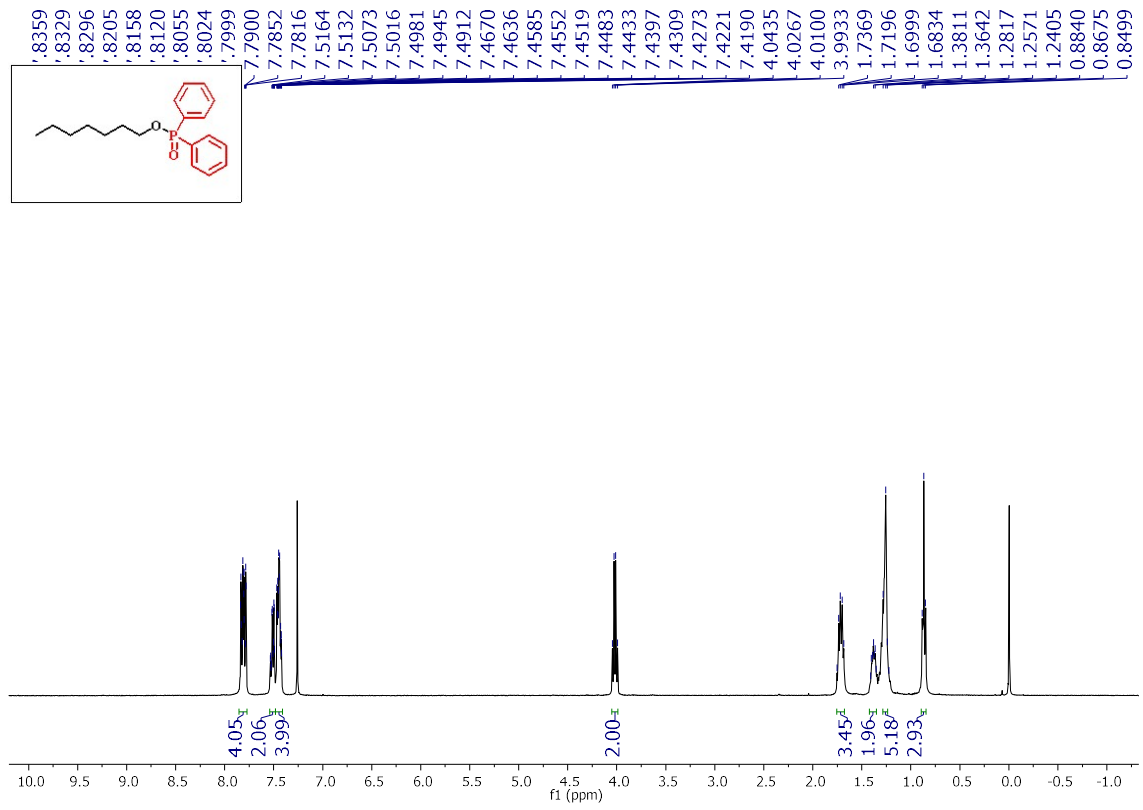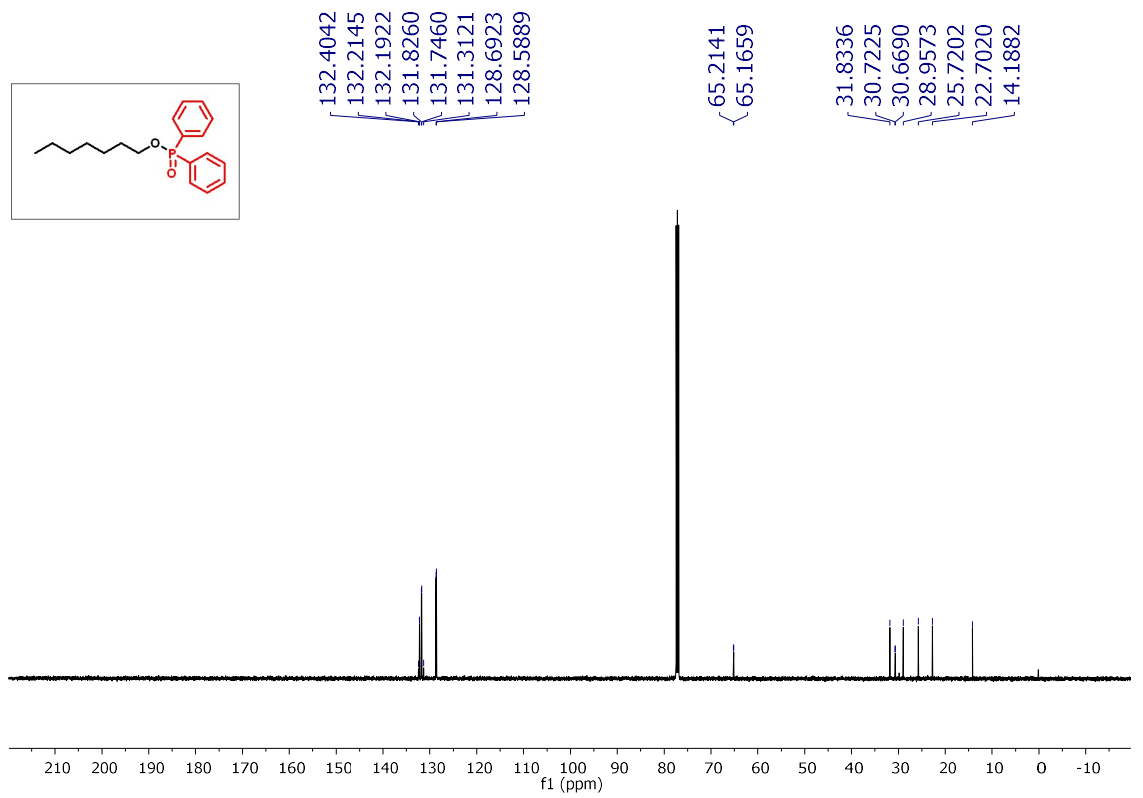

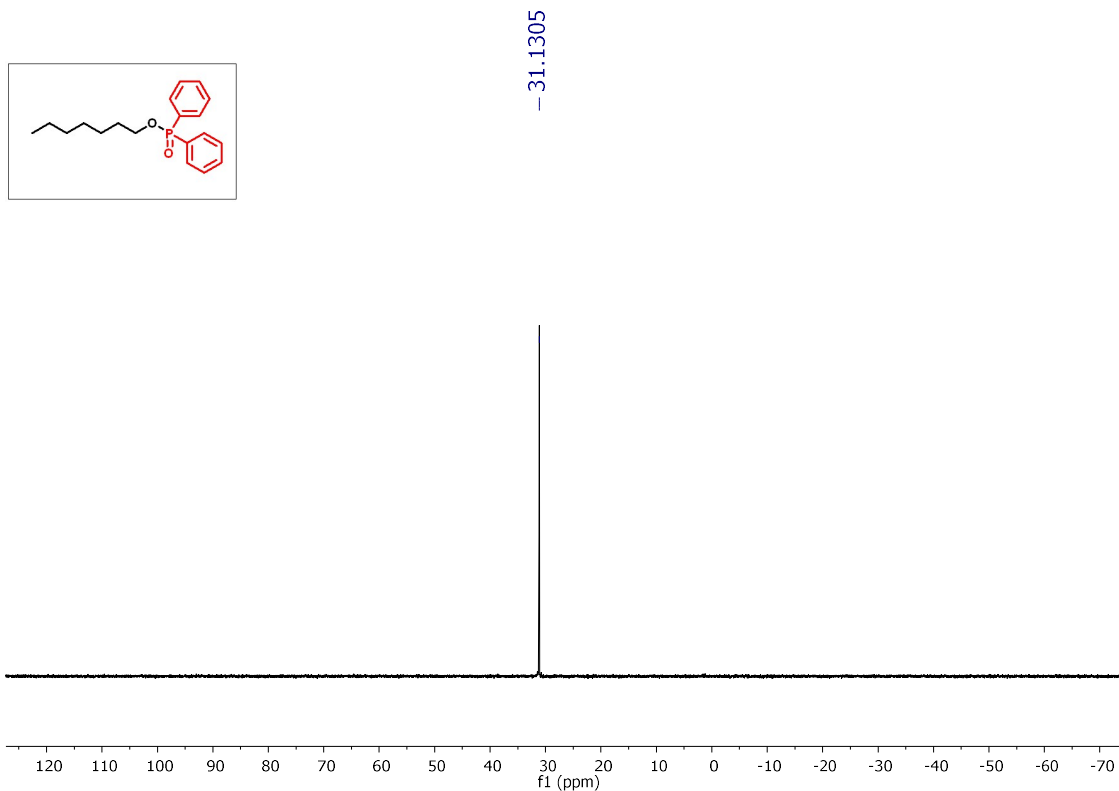

Figure S72.  $^1\text{H}$  NMR (500 MHz),  $^{13}\text{C}\{^1\text{H}\}$  NMR (125 MHz), and  $^{31}\text{P}\{^1\text{H}\}$  NMR (200 MHz) spectrum of Compound 4w in  $\text{CDCl}_3$

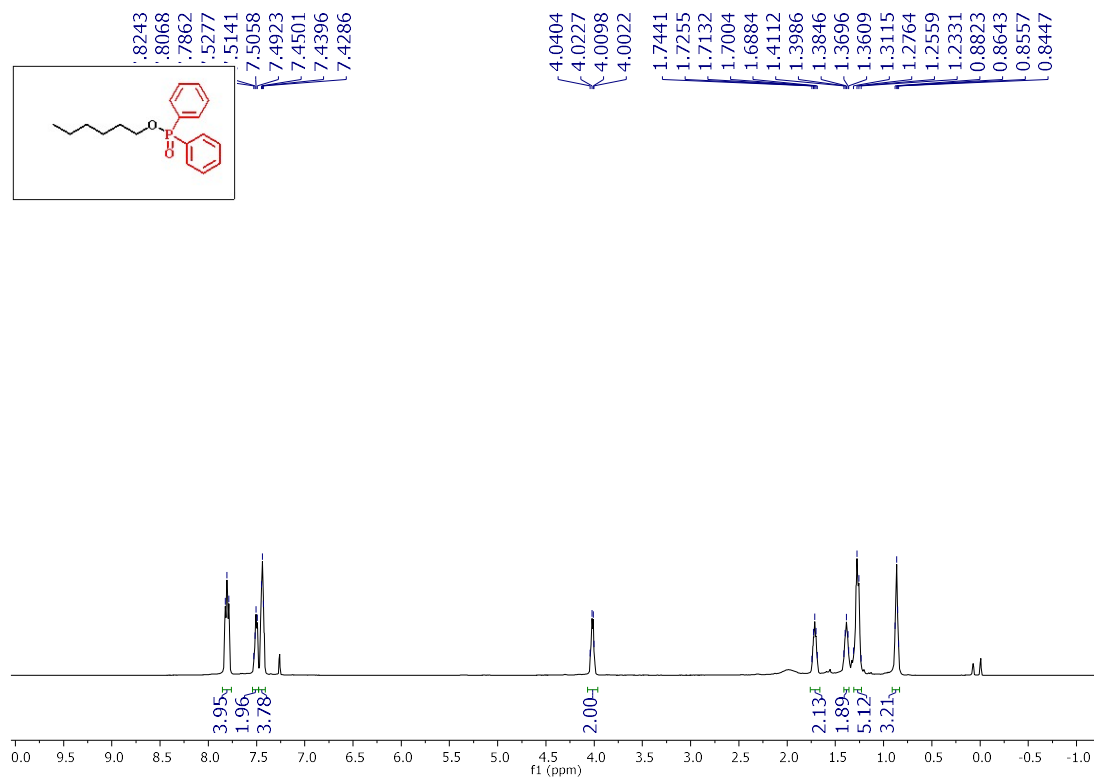

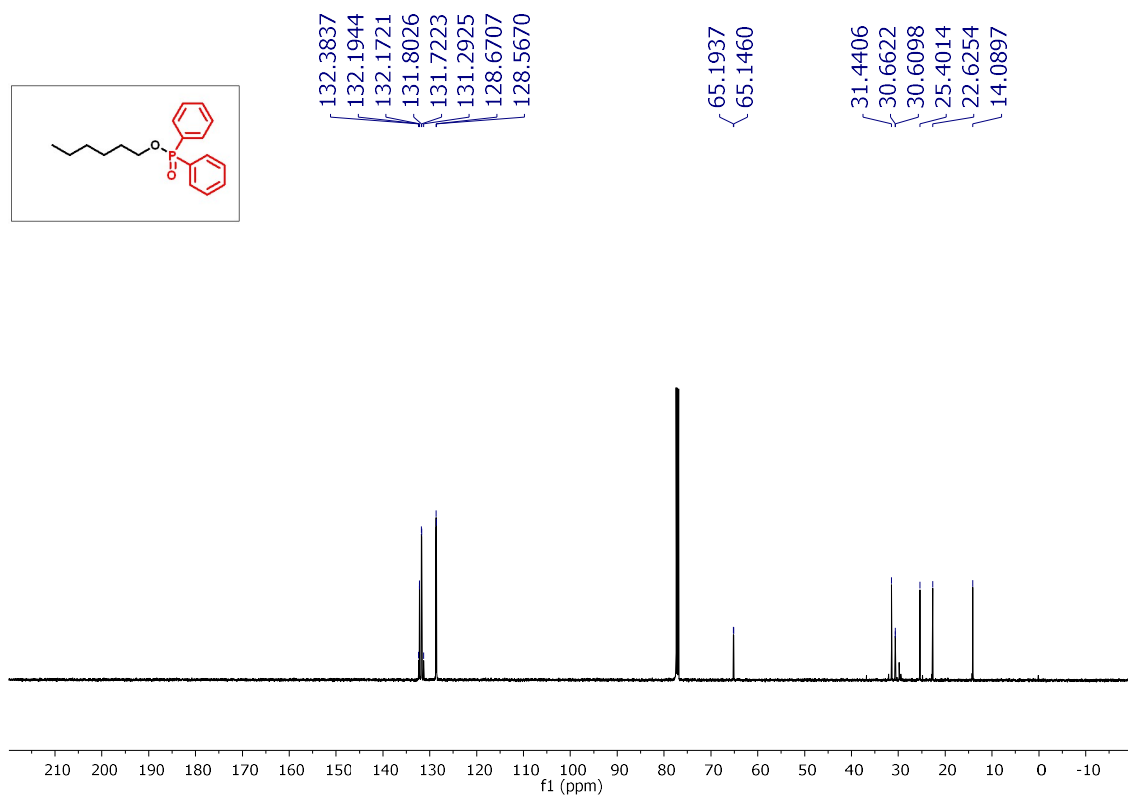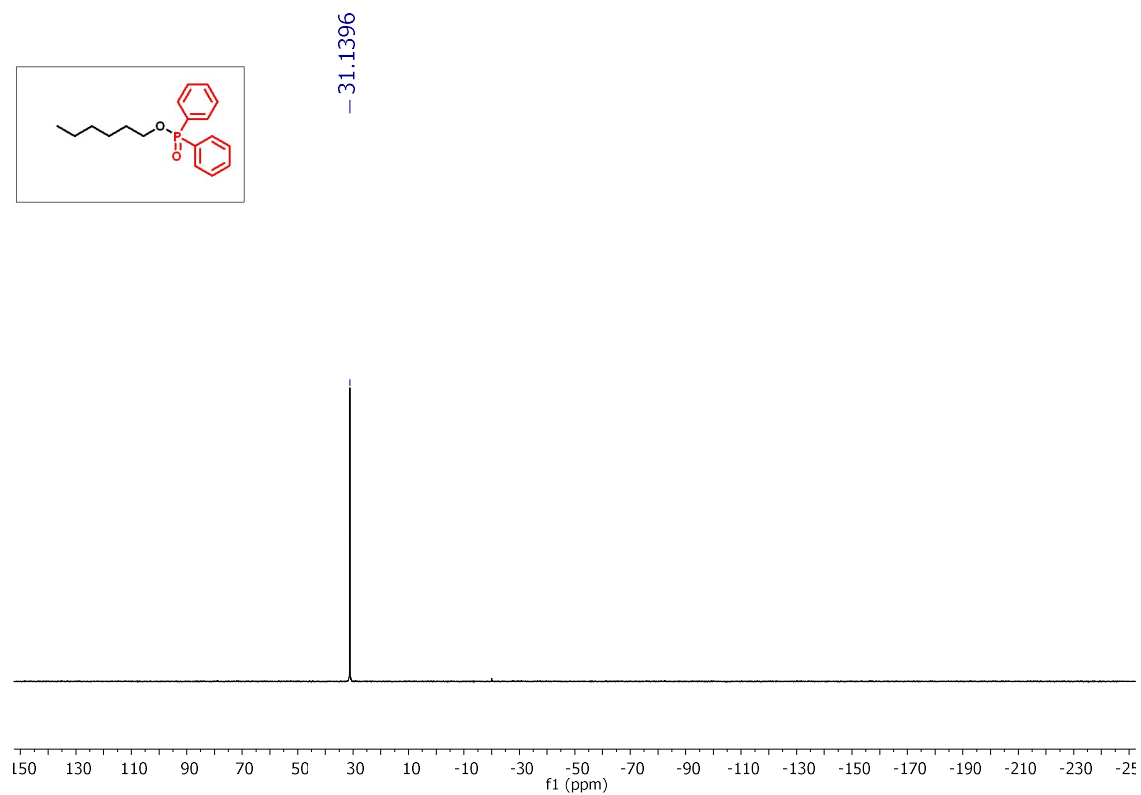

Figure S73. <sup>1</sup>H NMR (500 MHz), <sup>13</sup>C {<sup>1</sup>H} NMR (125 MHz), and <sup>31</sup>P {<sup>1</sup>H} NMR (200 MHz) spectrum of Compound 4x in CDCl<sub>3</sub>

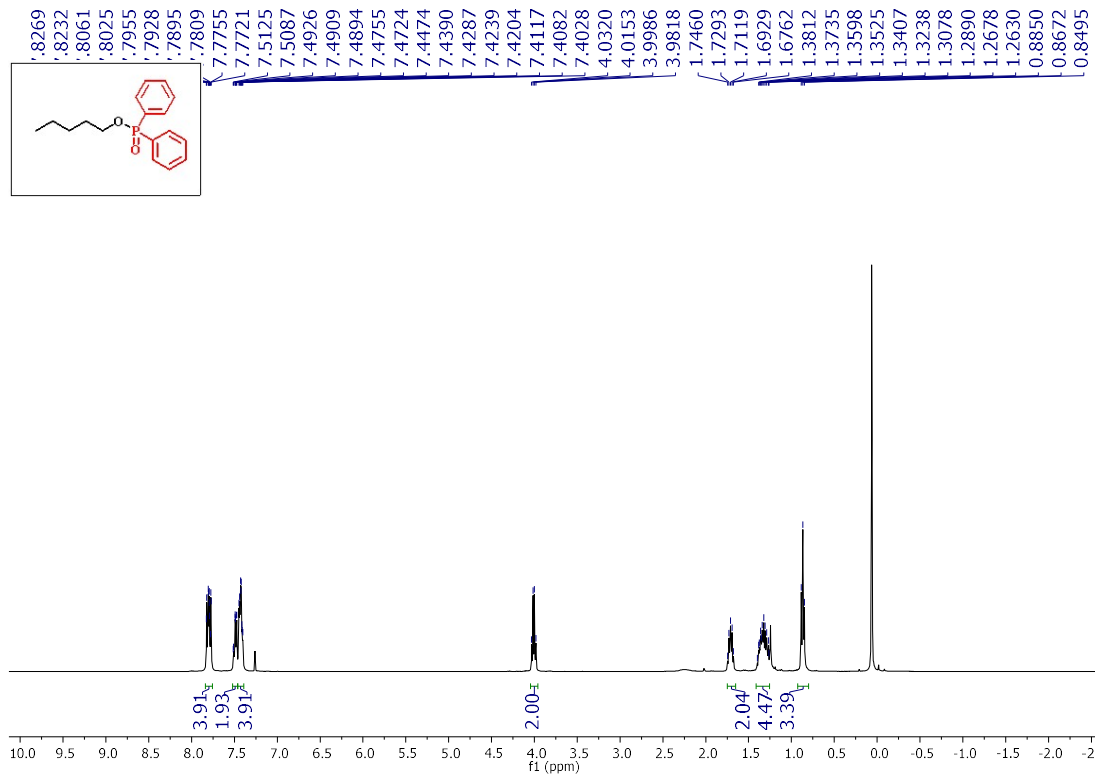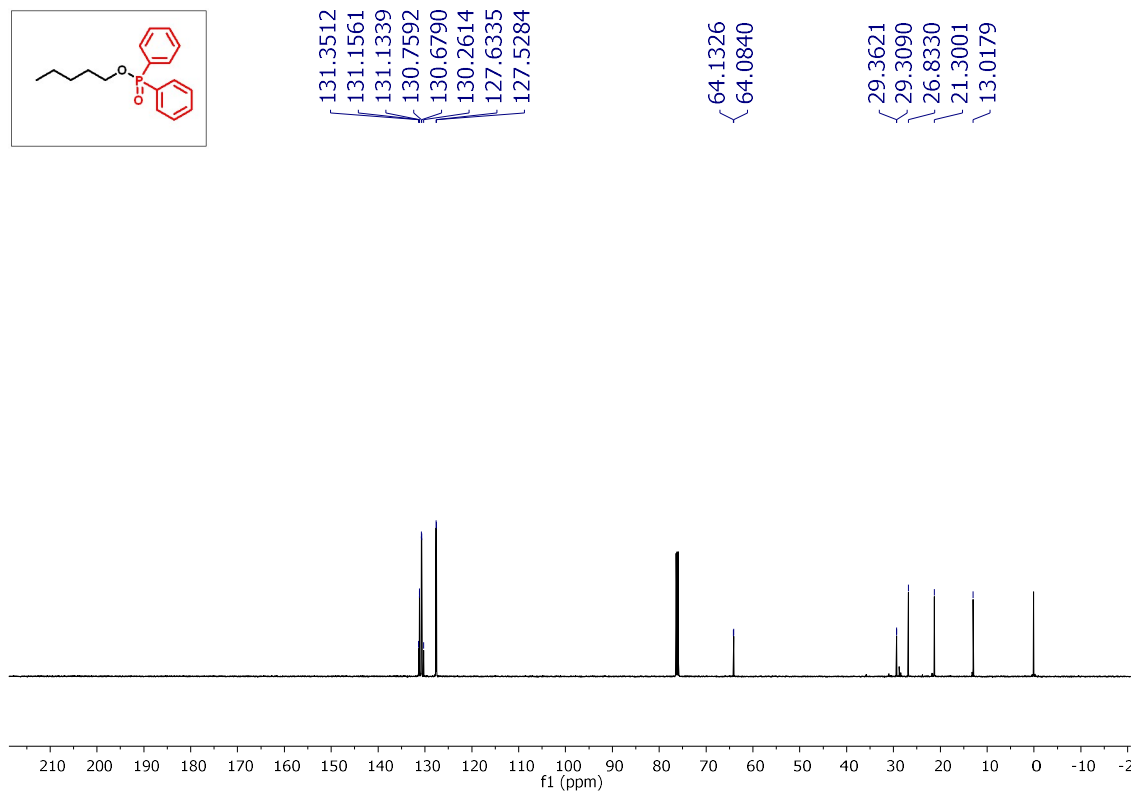

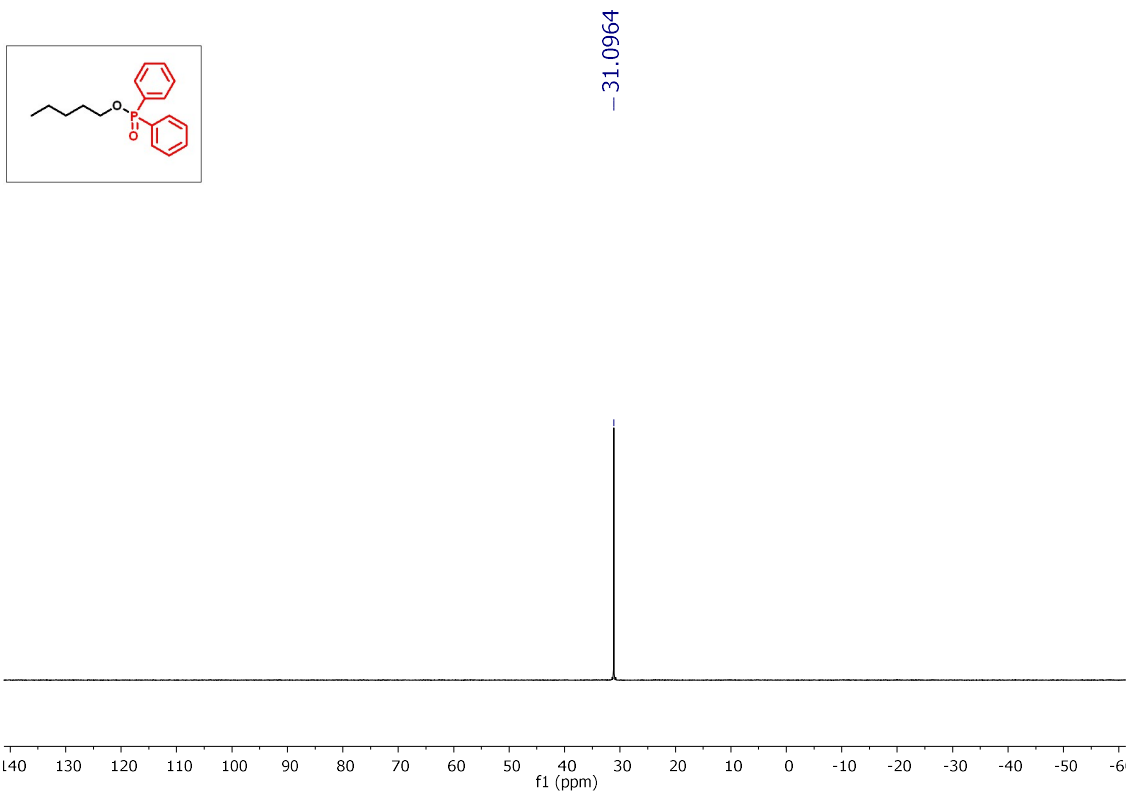

Figure S74.  $^1\text{H}$  NMR (500 MHz),  $^{13}\text{C}$   $\{^1\text{H}\}$  NMR (125 MHz), and  $^{31}\text{P}$   $\{^1\text{H}\}$  NMR (200 MHz) spectrum of Compound 4y in  $\text{CDCl}_3$

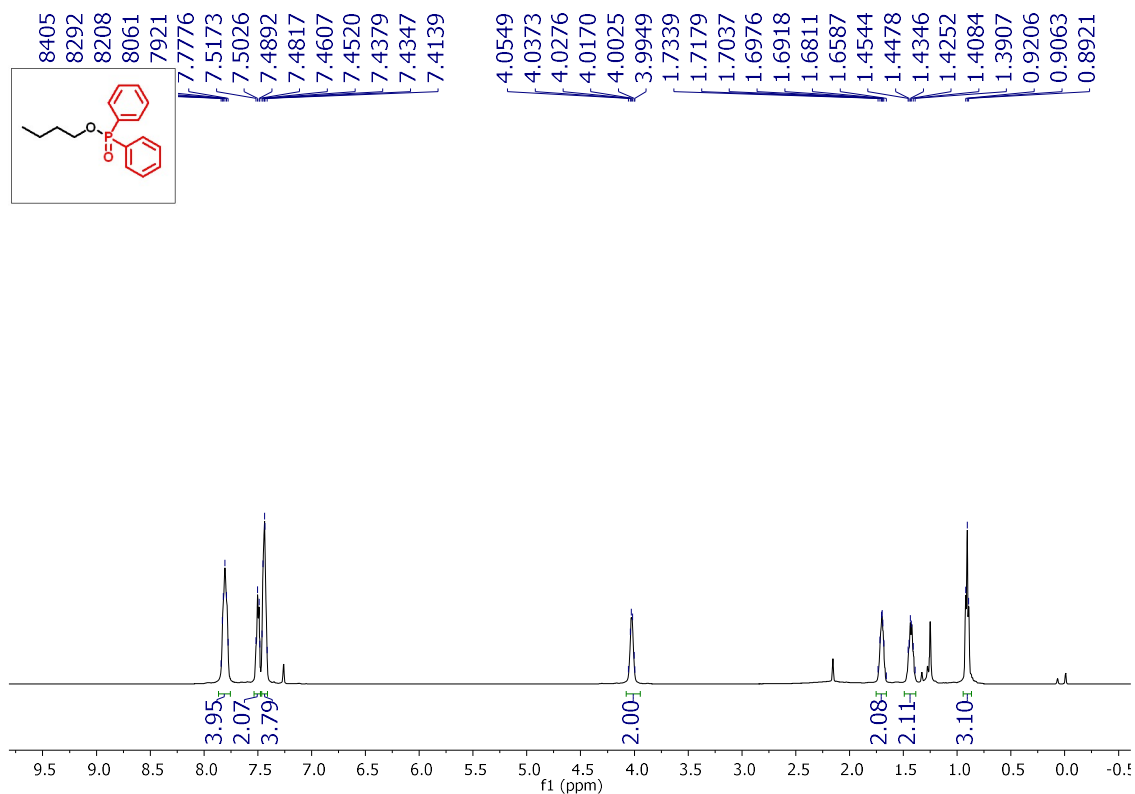

DS-RD-70-A-13C.3.fid  
DS-RD-70-A-13C

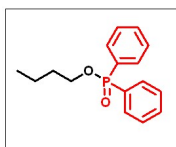

132.3252  
132.2097  
132.1874  
131.7930  
131.7129  
131.2350  
128.6797  
128.5765

77.4147  
77.1599  
76.9063  
64.8697  
64.8217

32.7266  
32.6733  
18.9942  
13.7610

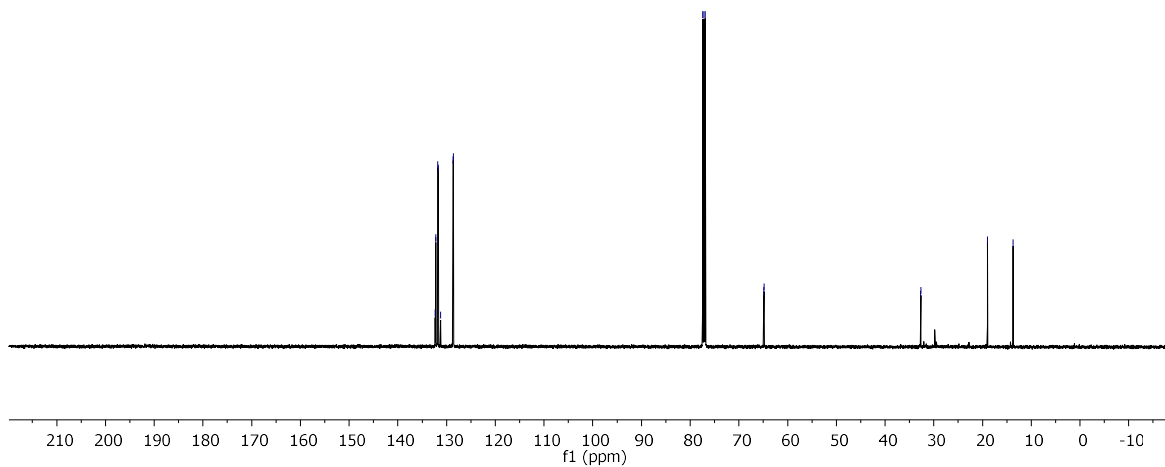

DS-HP-BUT-A-31P.5.fid  
DS-HP-BUT-A-31P

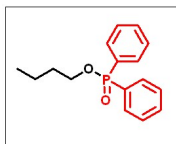

- 31.20

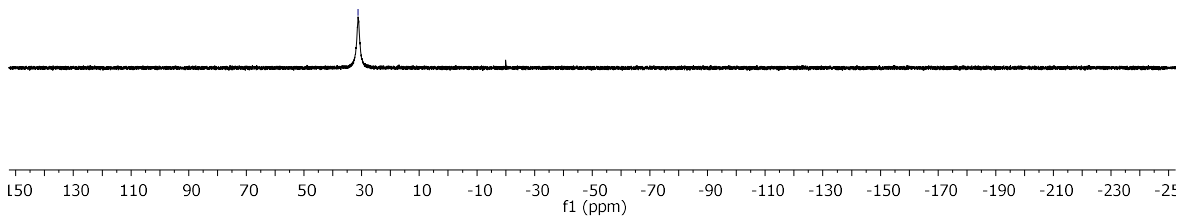

Figure S75.  $^1\text{H}$  NMR (500 MHz),  $^{13}\text{C}\{^1\text{H}\}$  NMR (125 MHz), and  $^{31}\text{P}\{^1\text{H}\}$  NMR (200 MHz) spectrum of Compound 4z in  $\text{CDCl}_3$

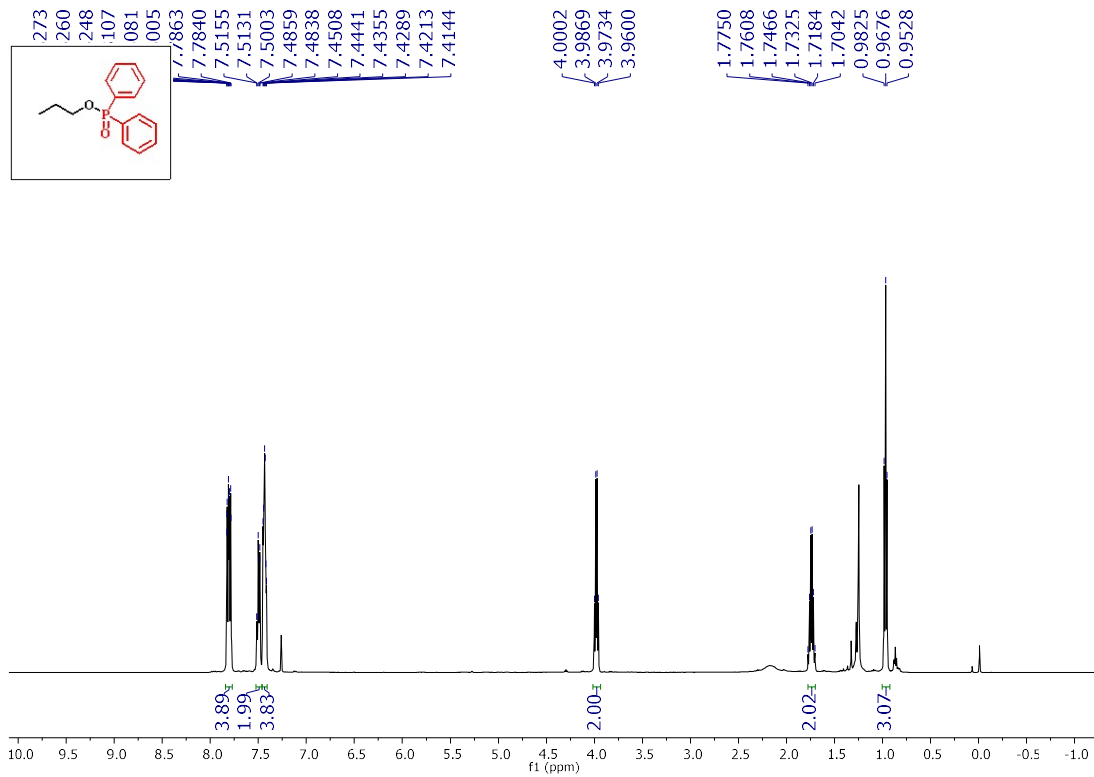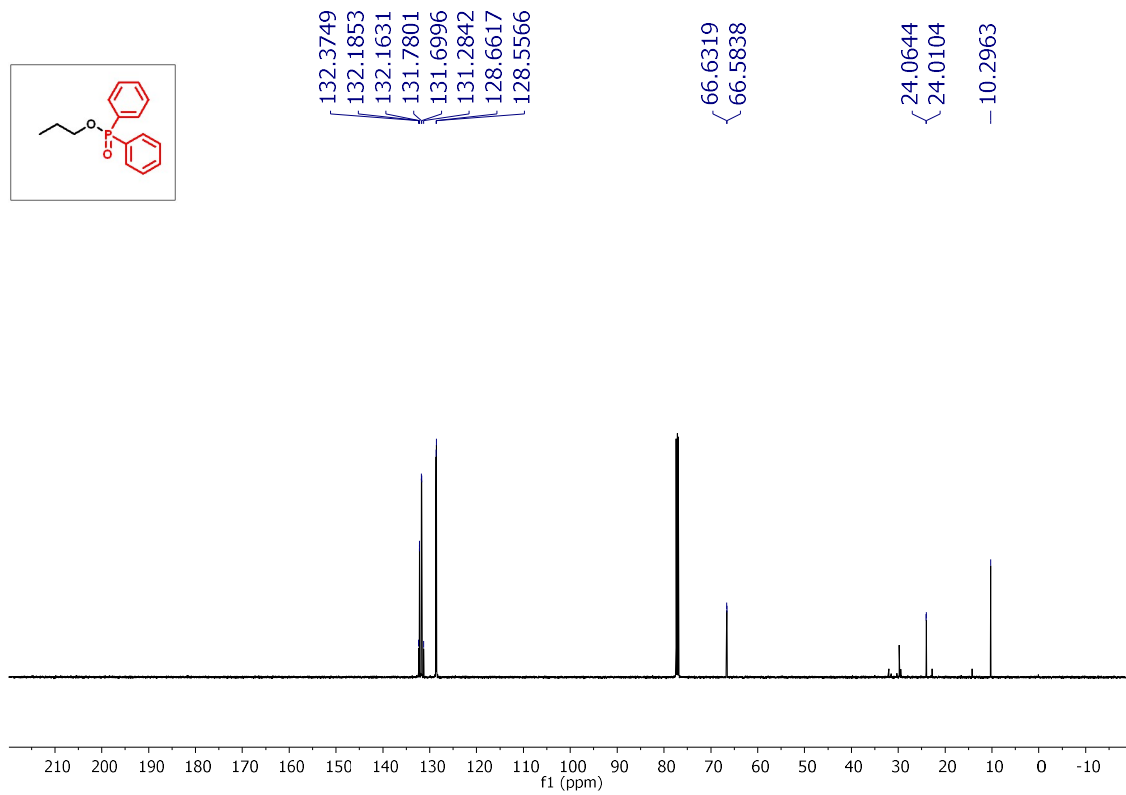

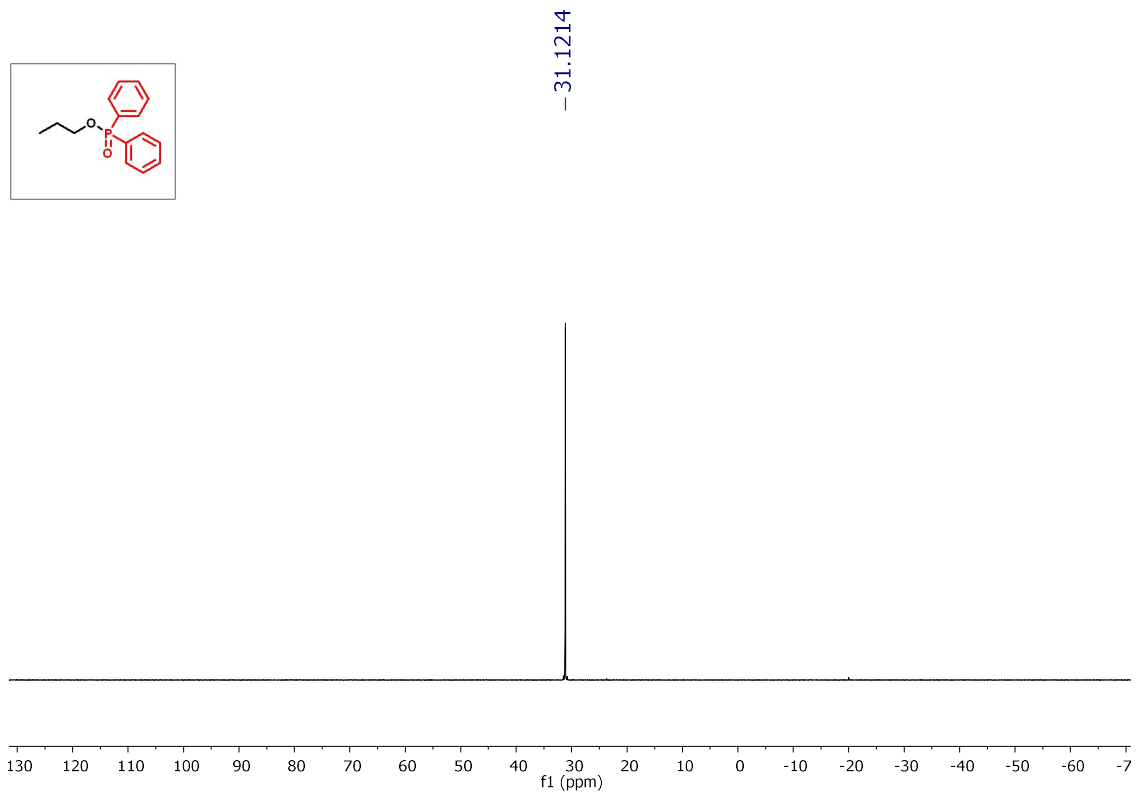

Figure S76.  $^1\text{H}$  NMR (500 MHz),  $^{13}\text{C}\{^1\text{H}\}$  NMR (125 MHz), and  $^{31}\text{P}\{^1\text{H}\}$  NMR (200 MHz) spectrum of Compound 4aa in  $\text{CDCl}_3$

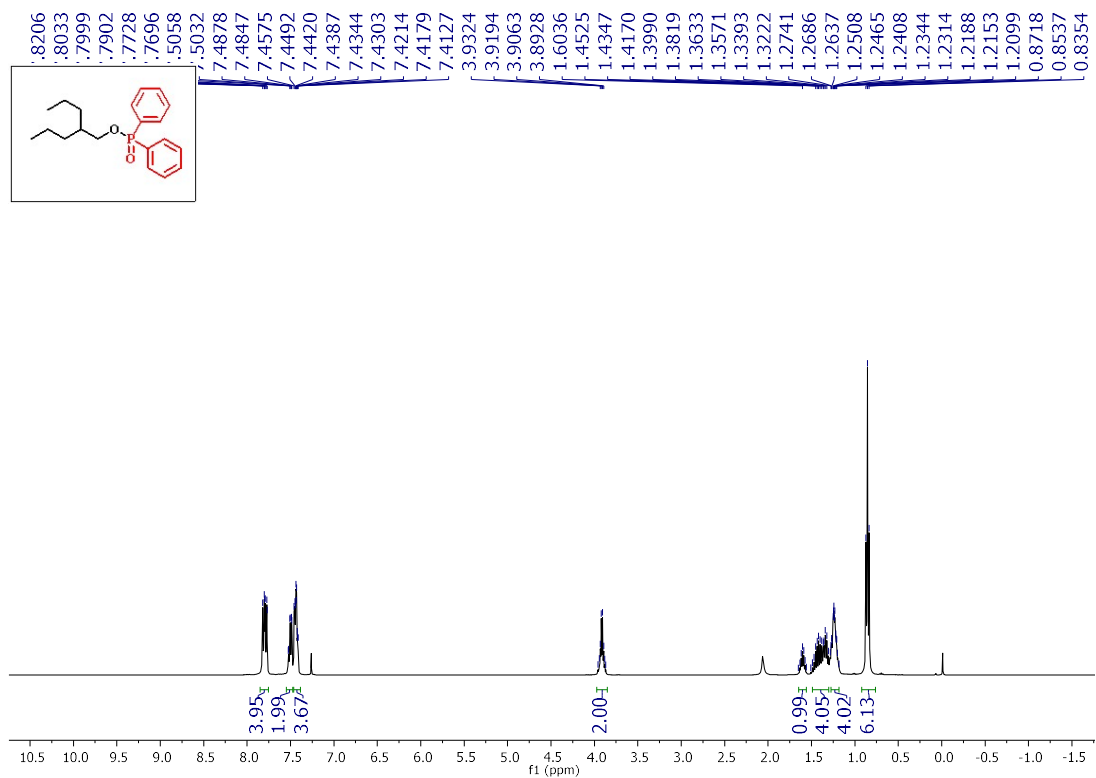

DS-HP-793-A-13C.4.fid  
DS-HP-793-A-13C

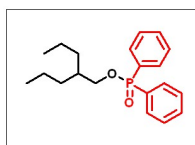

132.4121  
132.3882  
132.1644  
132.1426  
131.8096  
131.7951  
131.7295  
131.7149  
131.3205  
131.2989  
128.6482  
128.5440  
  
66.8847  
66.8349  
  
40.3938  
40.3387  
30.1611  
28.9588  
23.5943  
23.0519  
14.1248  
11.0632

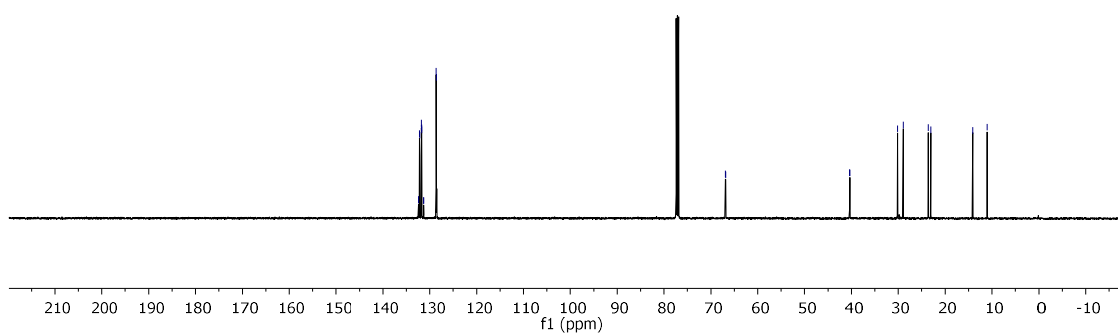

DS-HP-793-A-31P.6.fid  
DS-HP-793-A-31P

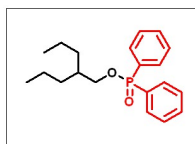

-30.8513

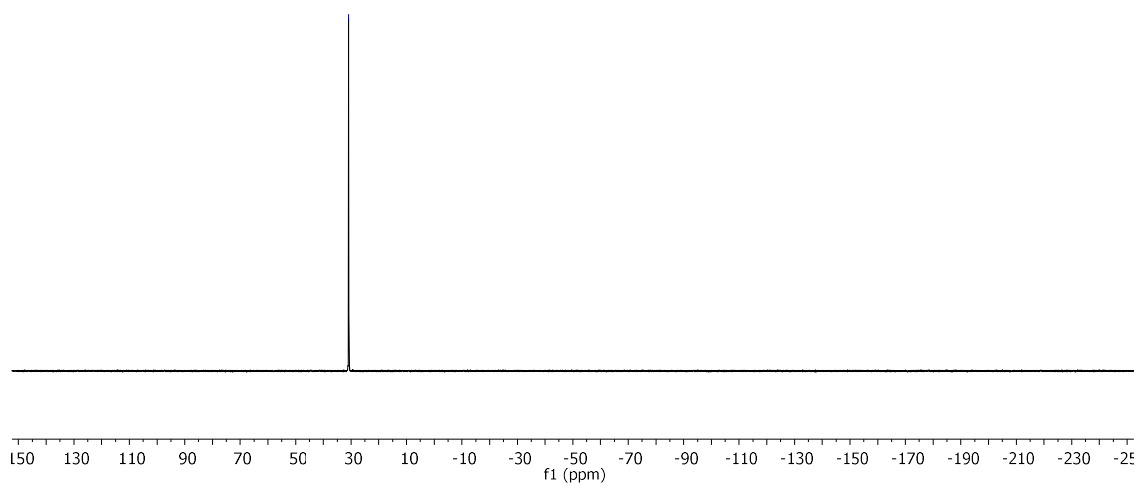

Figure S77.  $^1\text{H}$  NMR (500 MHz),  $^{13}\text{C}\{^1\text{H}\}$  NMR (125 MHz), and  $^{31}\text{P}\{^1\text{H}\}$  NMR (200 MHz) spectrum of Compound 4ab in  $\text{CDCl}_3$

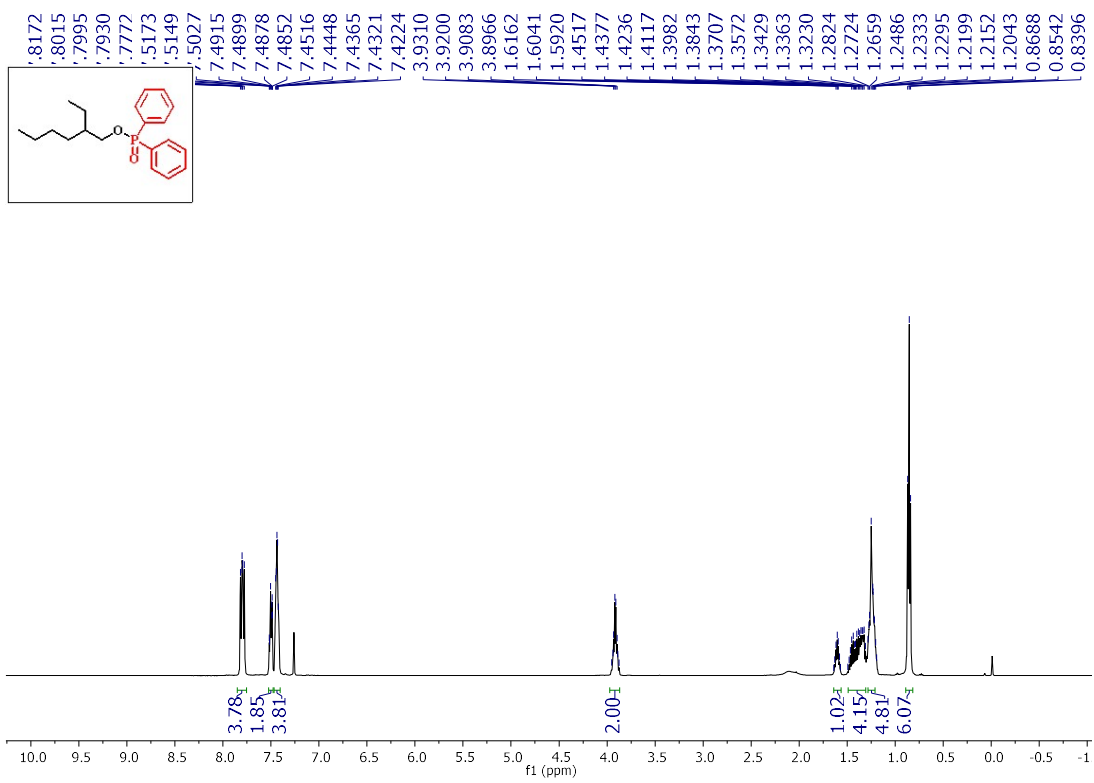

DS-HP-977-A-13C.3.fid  
DS-HP-977-A-13C

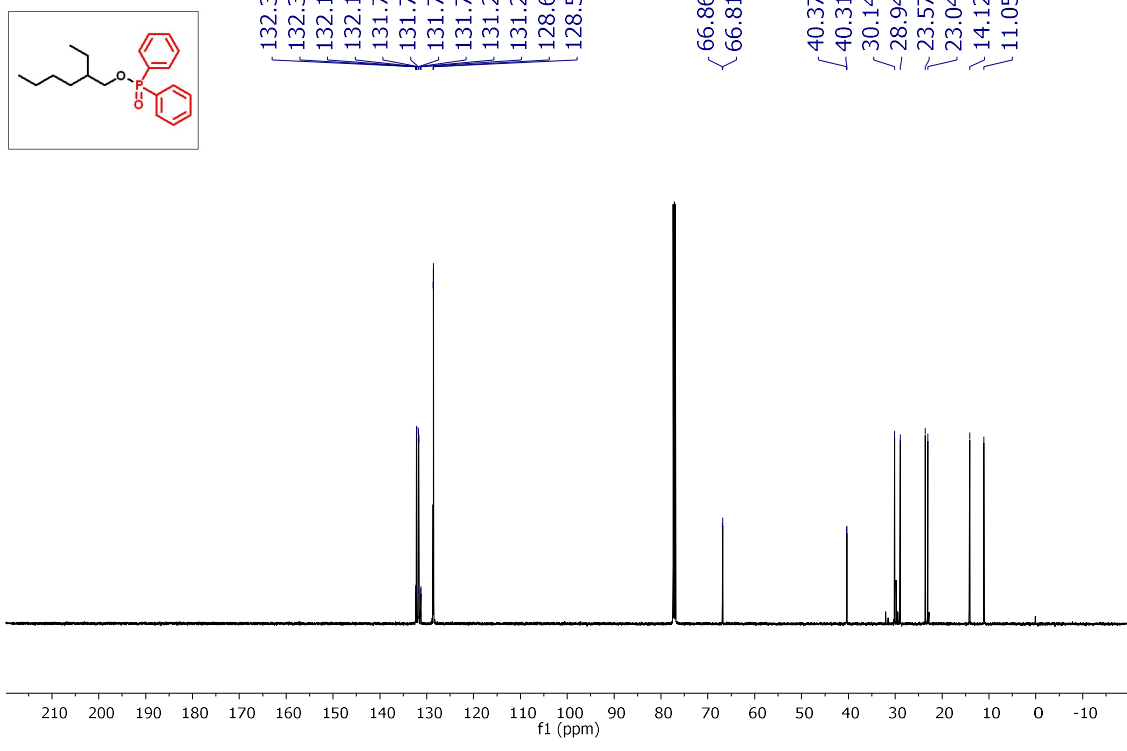

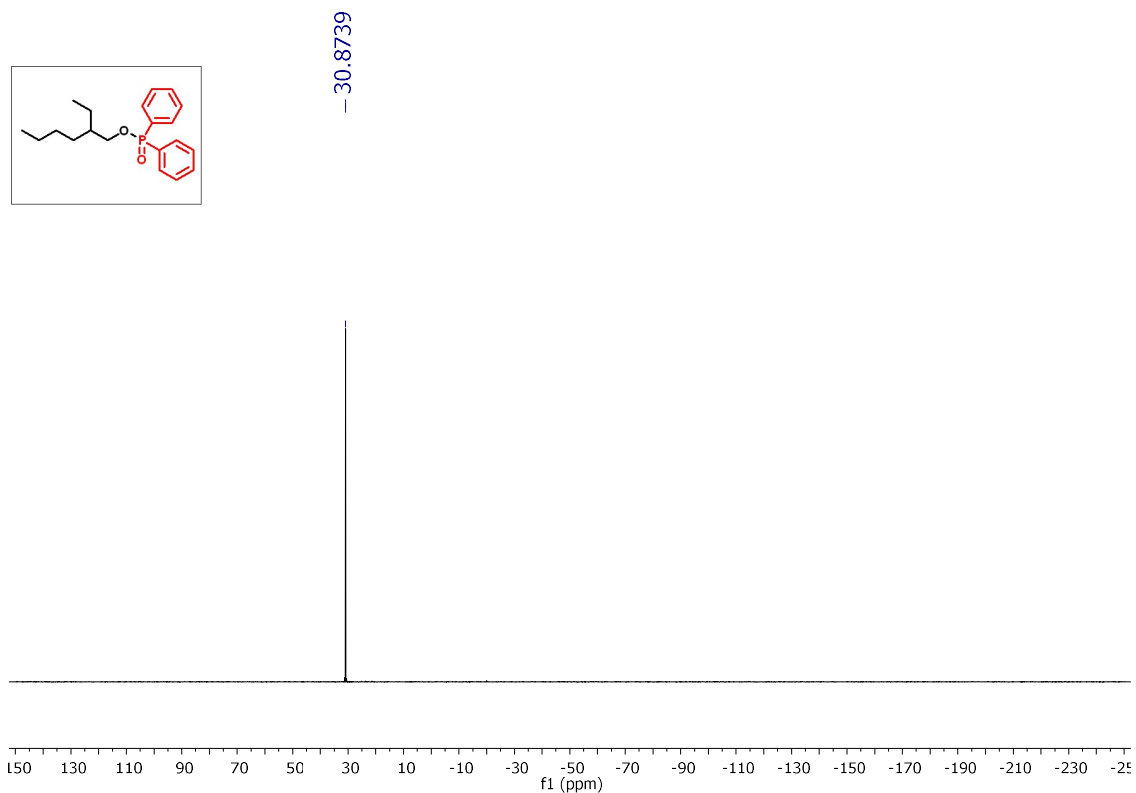

Figure S78.  $^1\text{H}$  NMR (500 MHz),  $^{13}\text{C}\{^1\text{H}\}$  NMR (125 MHz), and  $^{31}\text{P}\{^1\text{H}\}$  NMR (200 MHz) spectrum of Compound 4ac in  $\text{CDCl}_3$

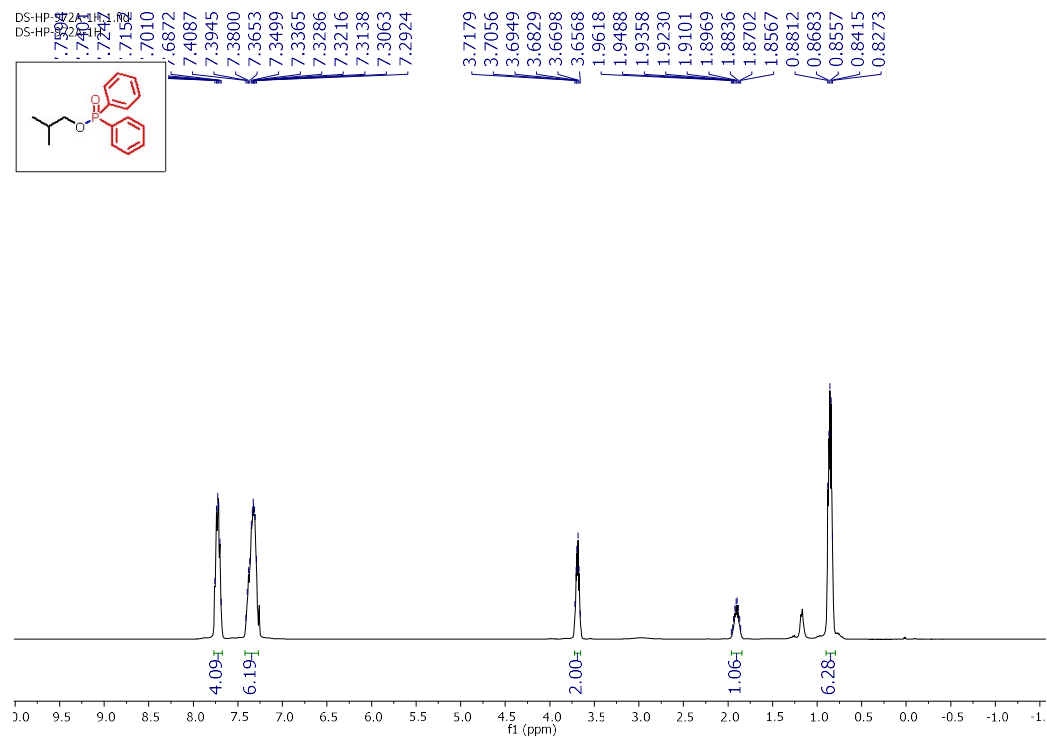

DS-HP-972A-13C.3.fid  
DS-HP-972A-13C

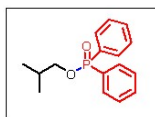

132.0569  
131.9094  
131.4548  
131.3750  
130.9662  
128.3852  
128.2808

77.4116  
77.1602  
76.9153  
70.5322  
70.4830

29.0995  
29.0454  
-18.6797

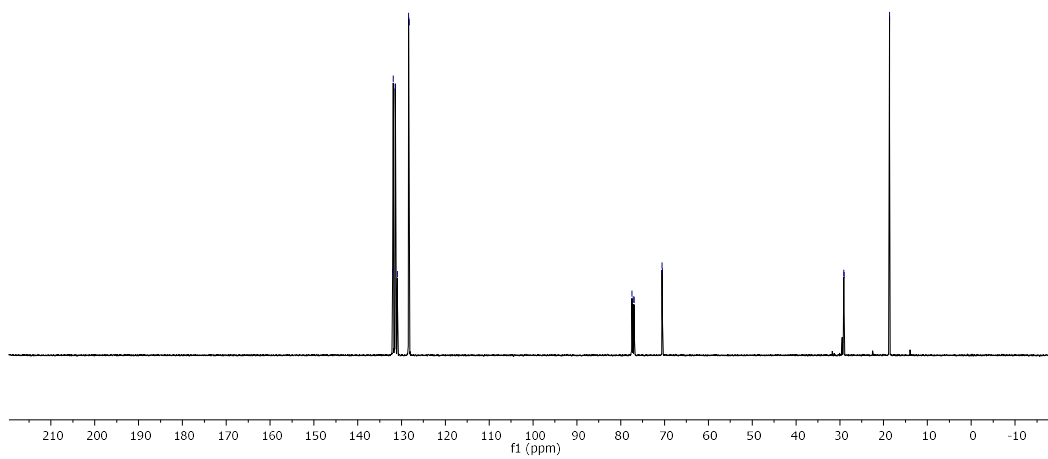

DS-HP-972A-31P.5.fid  
DS-HP-972A-31P

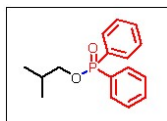

-30.74

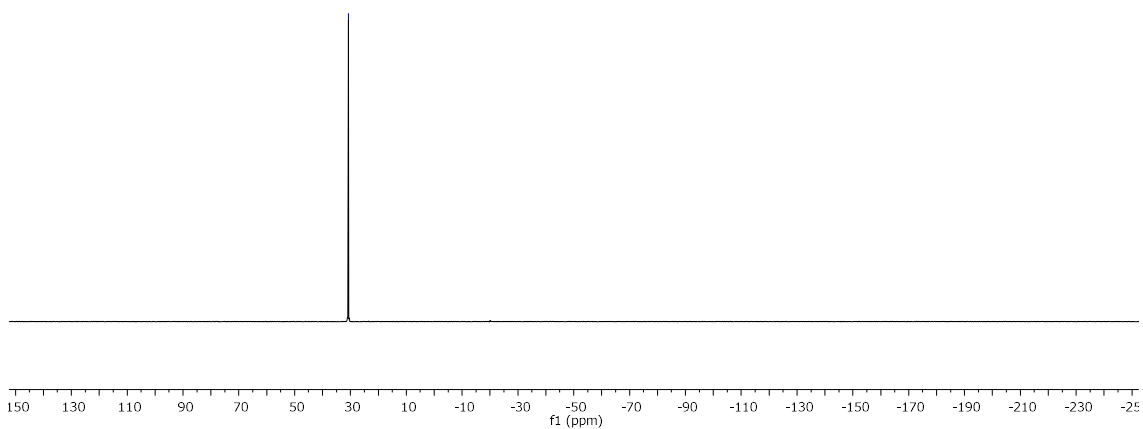

Figure S79.  $^1\text{H}$  NMR (500 MHz),  $^{13}\text{C}\{^1\text{H}\}$  NMR (125 MHz), and  $^{31}\text{P}\{^1\text{H}\}$  NMR (200 MHz) spectrum of Compound 4ad in  $\text{CDCl}_3$

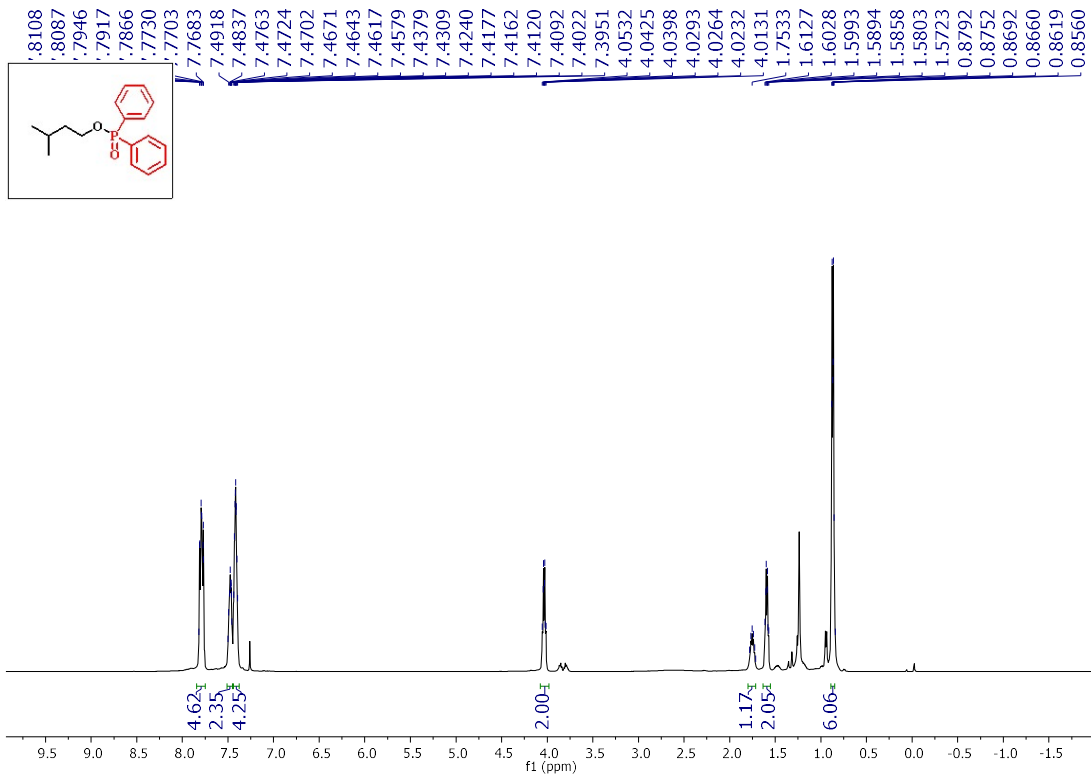

DS-HP-973-A-13C.3.fid  
DS-HP-973-A-13C

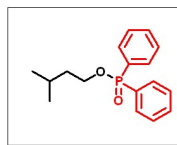

132.2753  
132.1442  
132.1221  
131.7161  
131.6357  
131.1862  
128.6103  
128.5071

63.5306  
63.4809

39.3605  
39.3092

24.7217  
22.4483

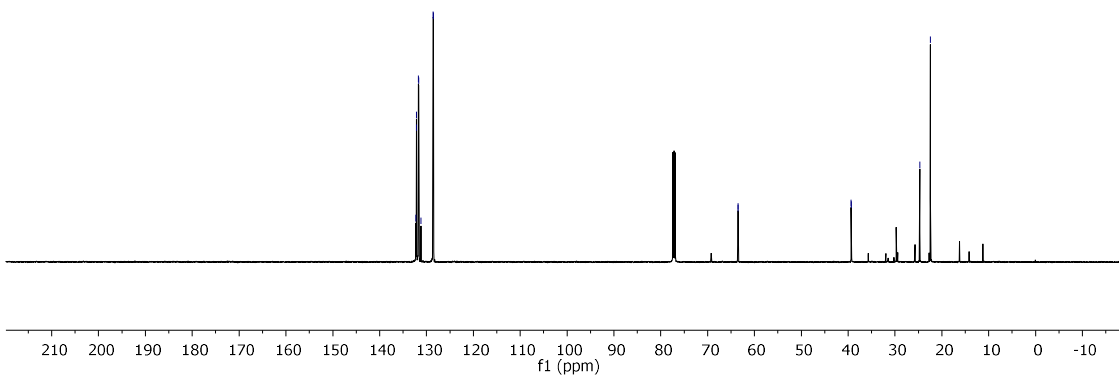

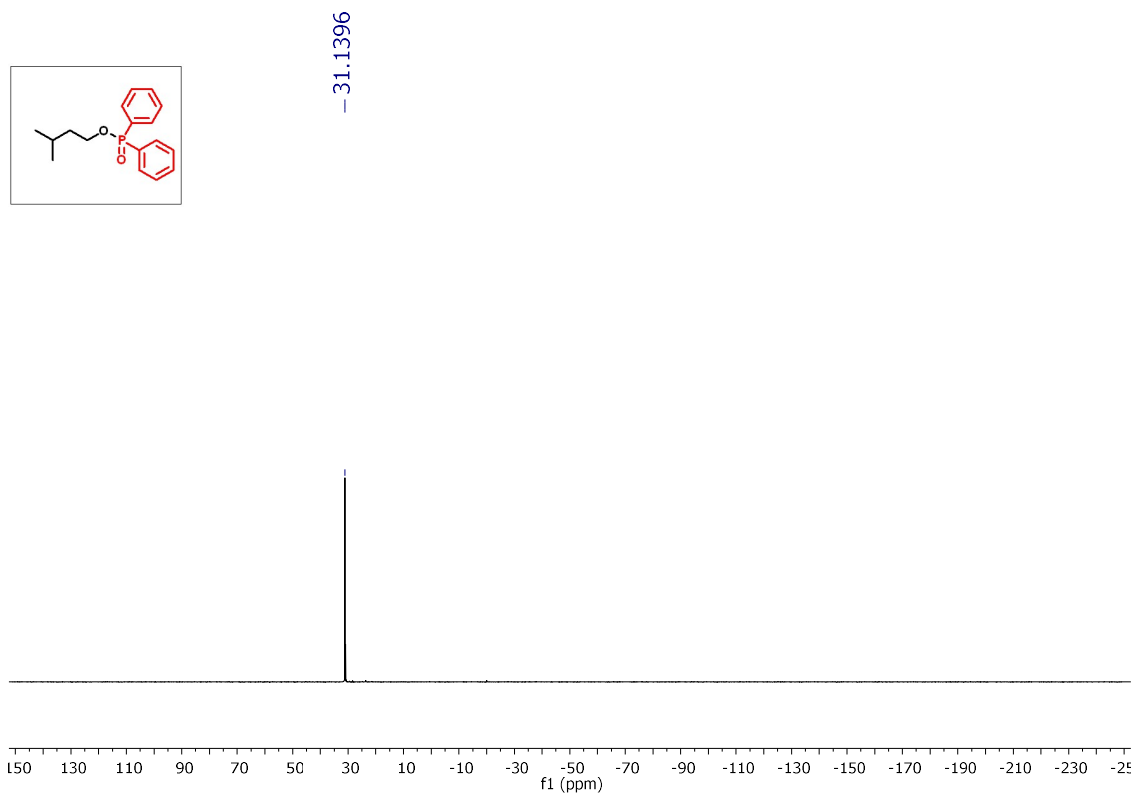

Figure S80.  $^1\text{H}$  NMR (500 MHz),  $^{13}\text{C}$   $\{^1\text{H}\}$  NMR (125 MHz), and  $^{31}\text{P}$   $\{^1\text{H}\}$  NMR (200 MHz) spectrum of Compound 4ae in  $\text{CDCl}_3$

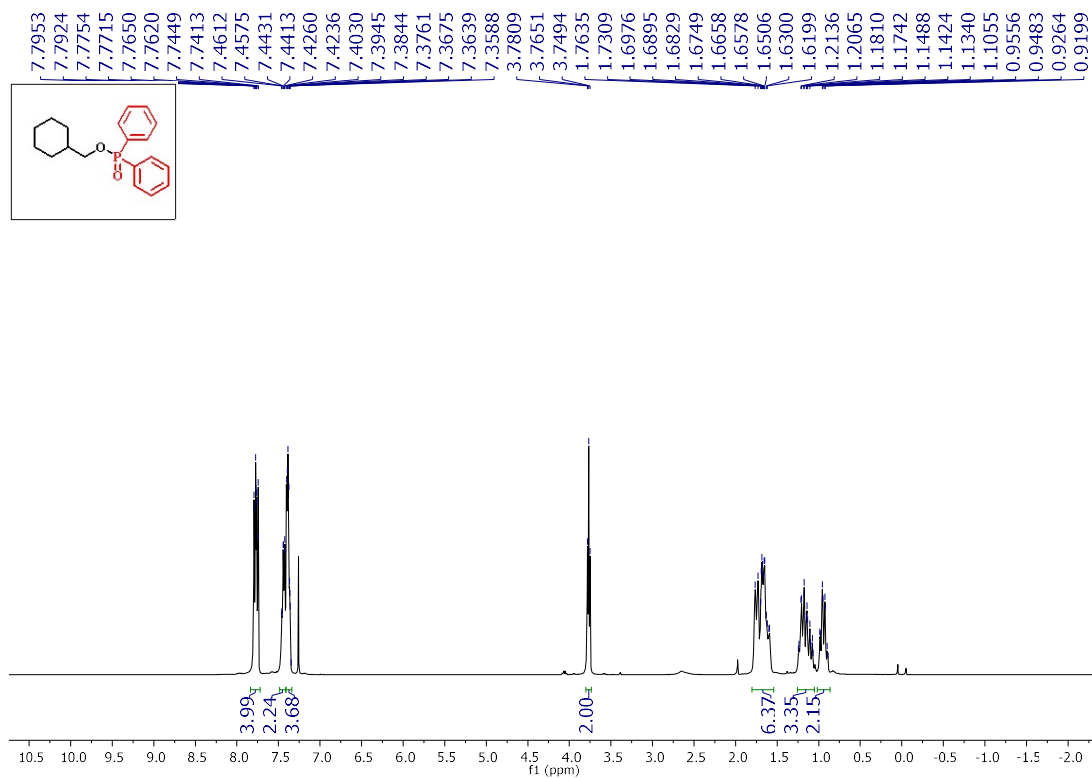

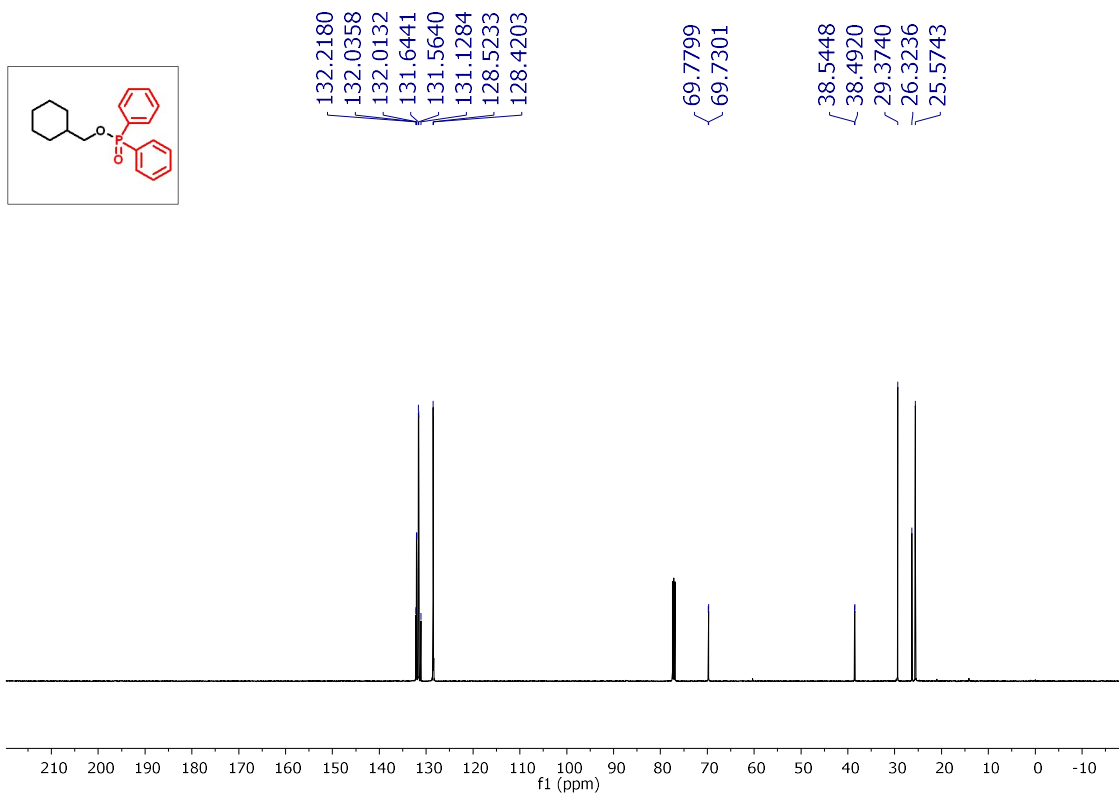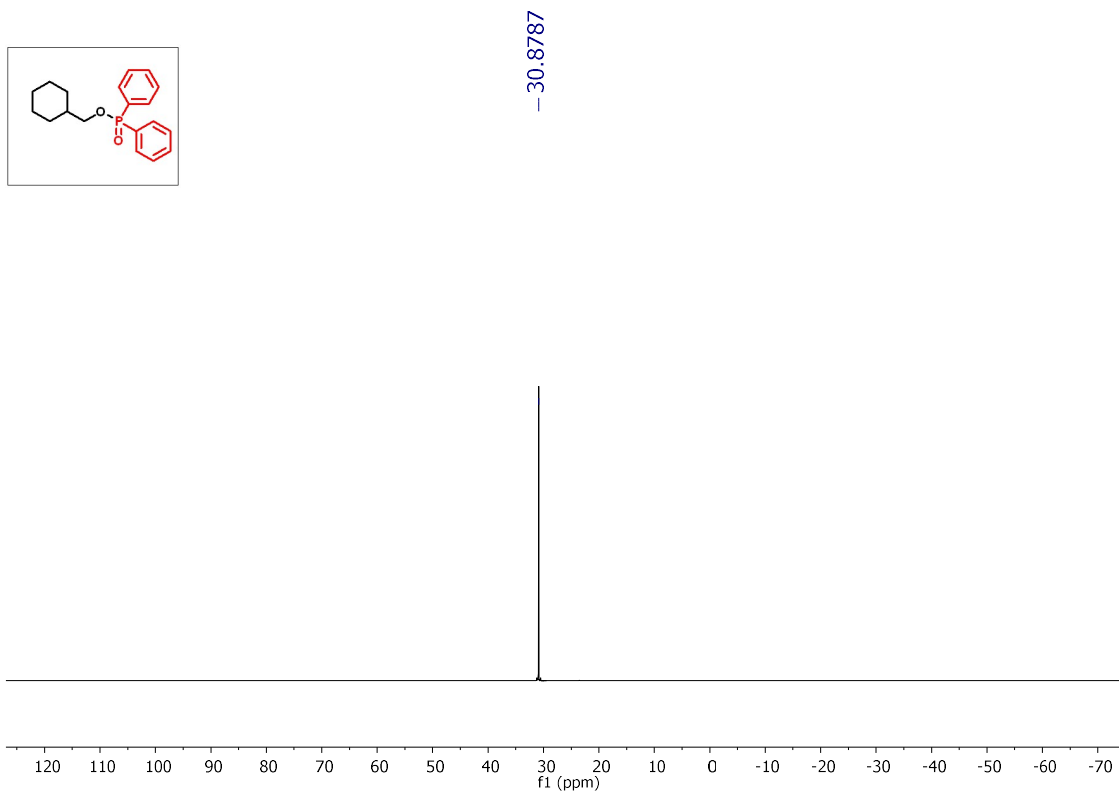

Figure S81.  $^1\text{H}$  NMR (500 MHz),  $^{13}\text{C}\{^1\text{H}\}$  NMR (125 MHz), and  $^{31}\text{P}\{^1\text{H}\}$  NMR (200 MHz) spectrum of Compound 4af in  $\text{CDCl}_3$

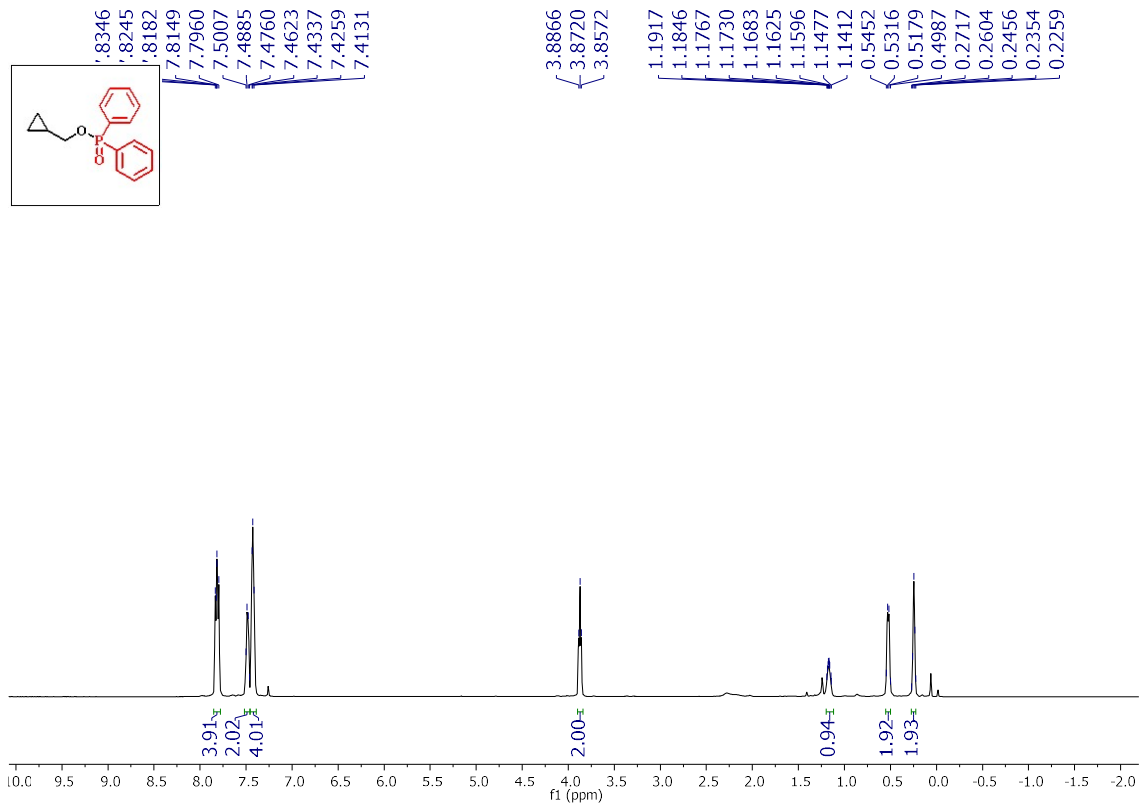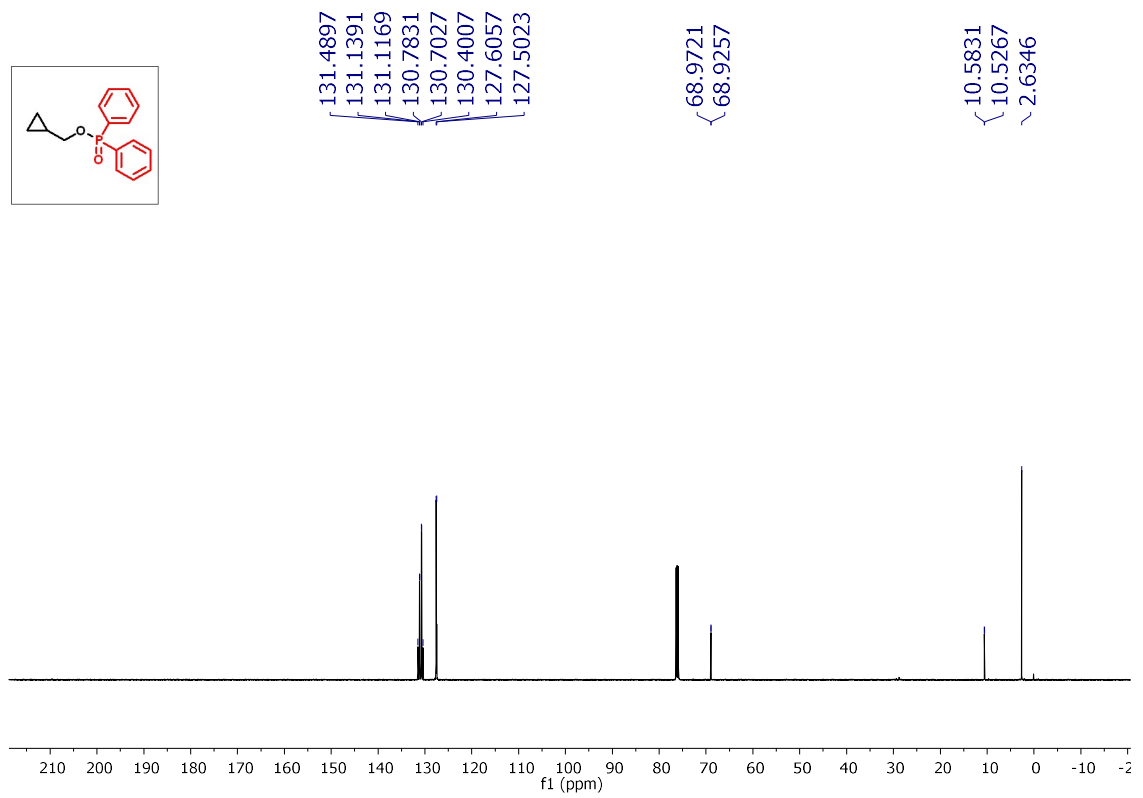

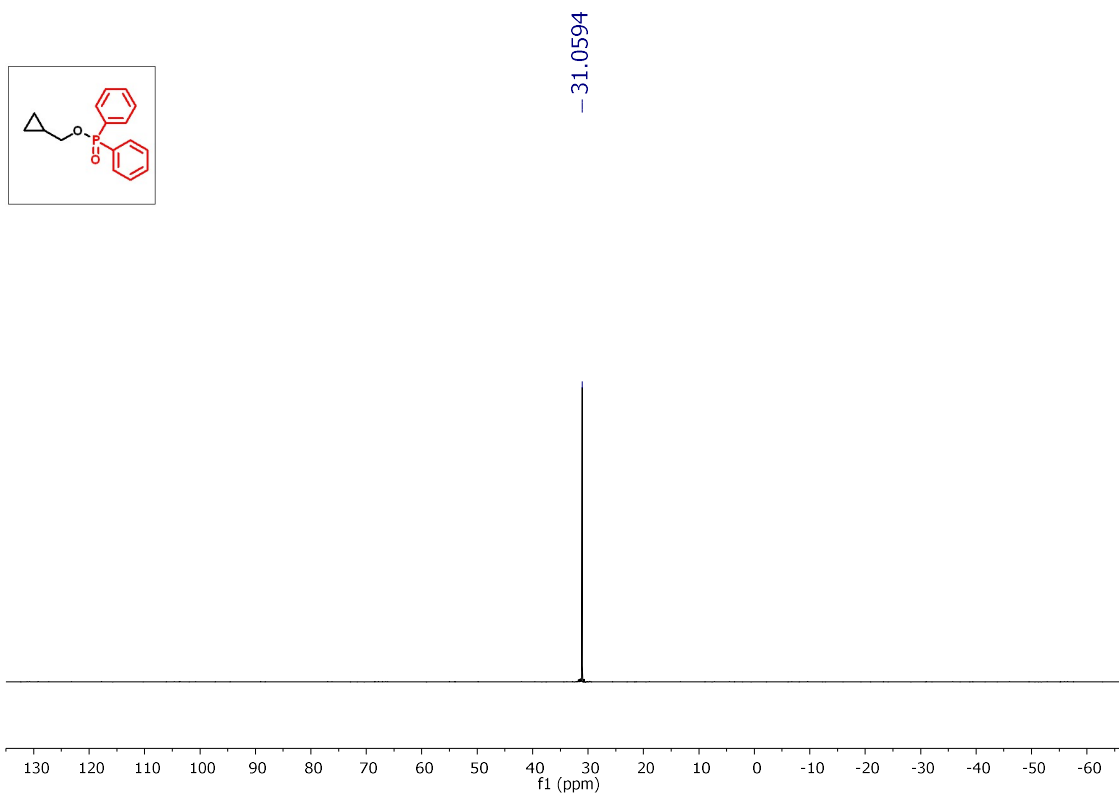

Figure S82.  $^1\text{H}$  NMR (500 MHz),  $^{13}\text{C}\{^1\text{H}\}$  NMR (125 MHz), and  $^{31}\text{P}\{^1\text{H}\}$  NMR (200 MHz) spectrum of Compound 4ag in  $\text{CDCl}_3$

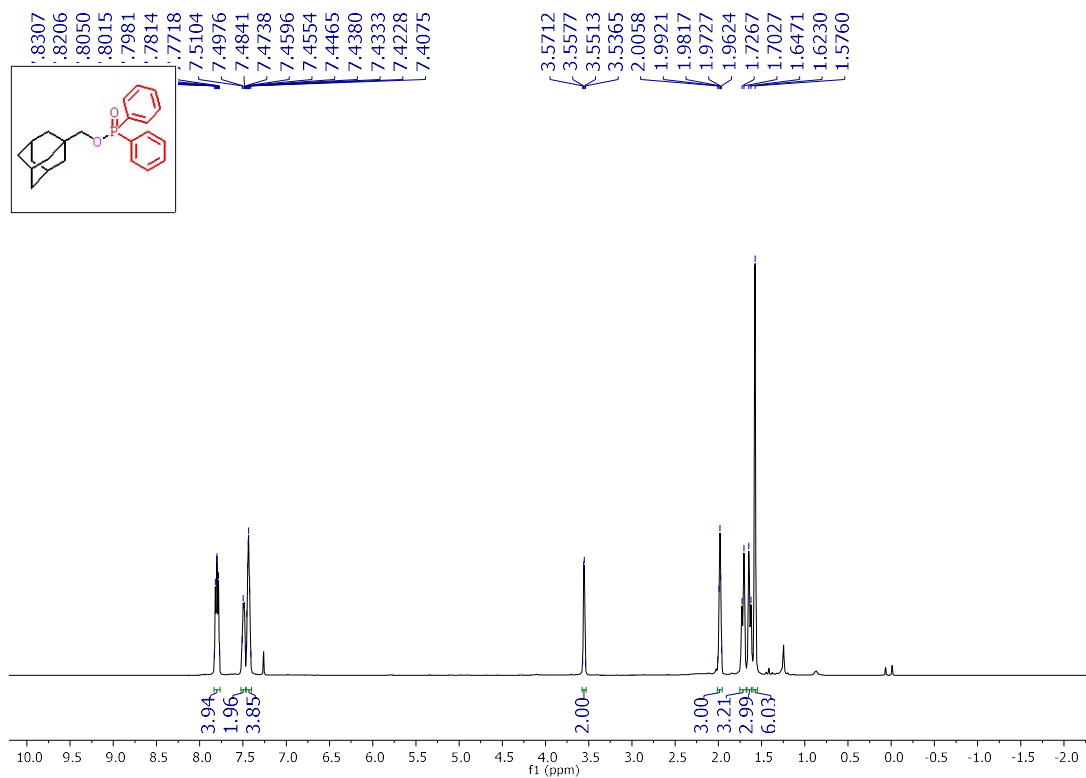

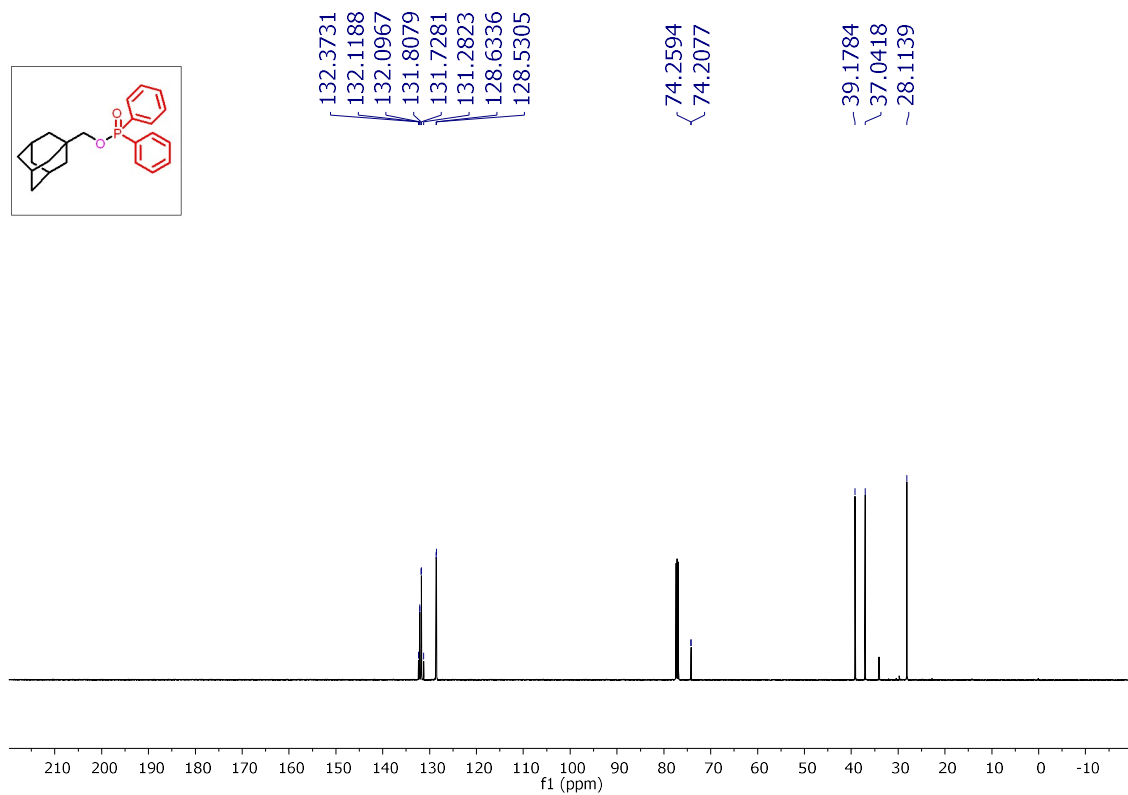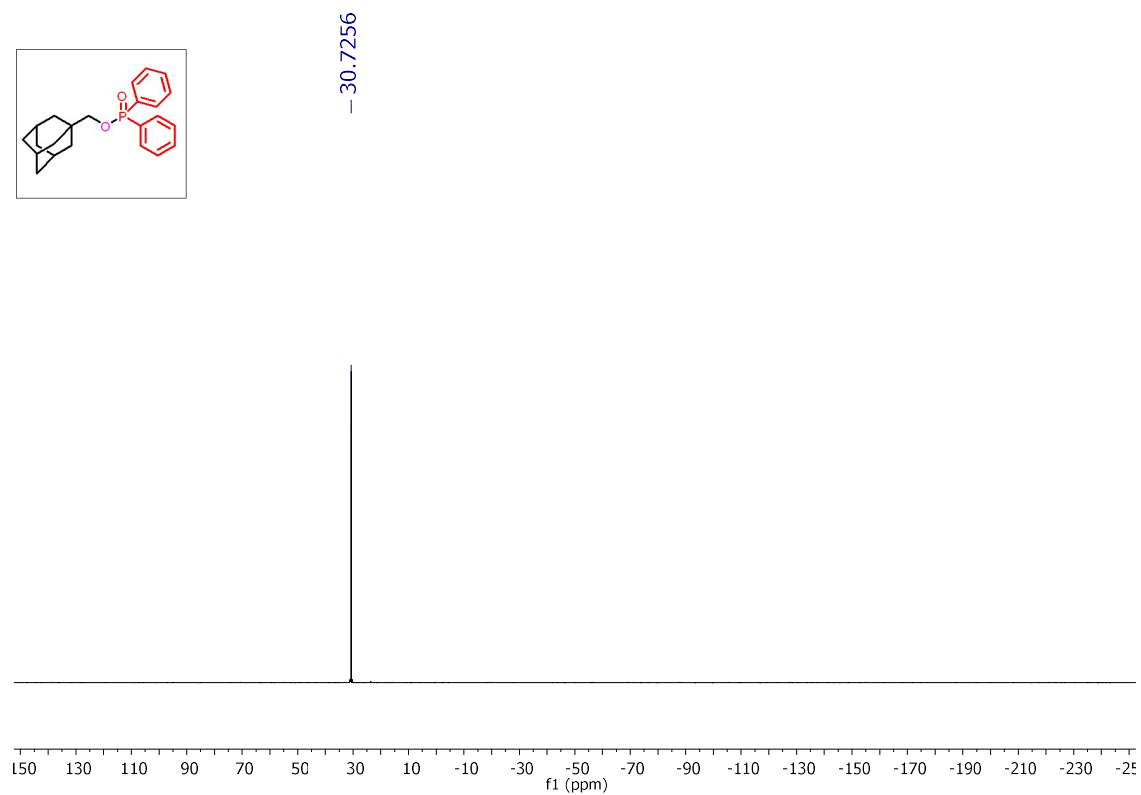

Figure S83.  $^1\text{H}$  NMR (500 MHz),  $^{13}\text{C}\{^1\text{H}\}$  NMR (125 MHz), and  $^{31}\text{P}\{^1\text{H}\}$  NMR (200 MHz) spectrum of Compound 4ah in  $\text{CDCl}_3$

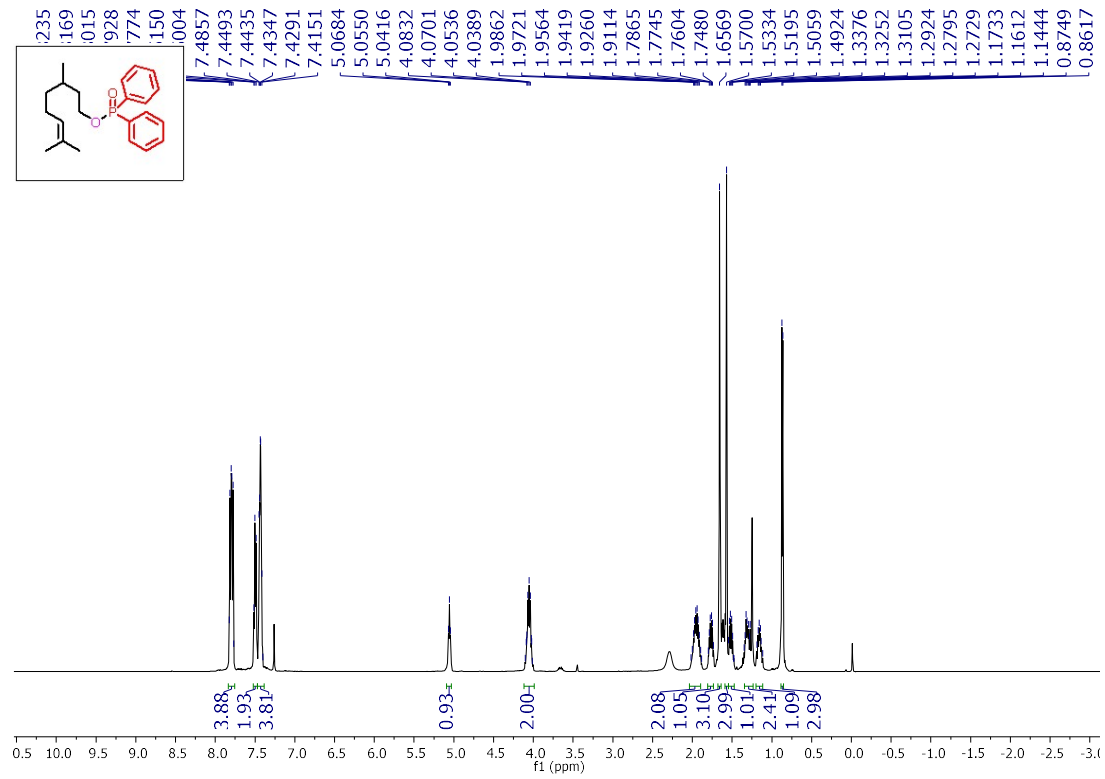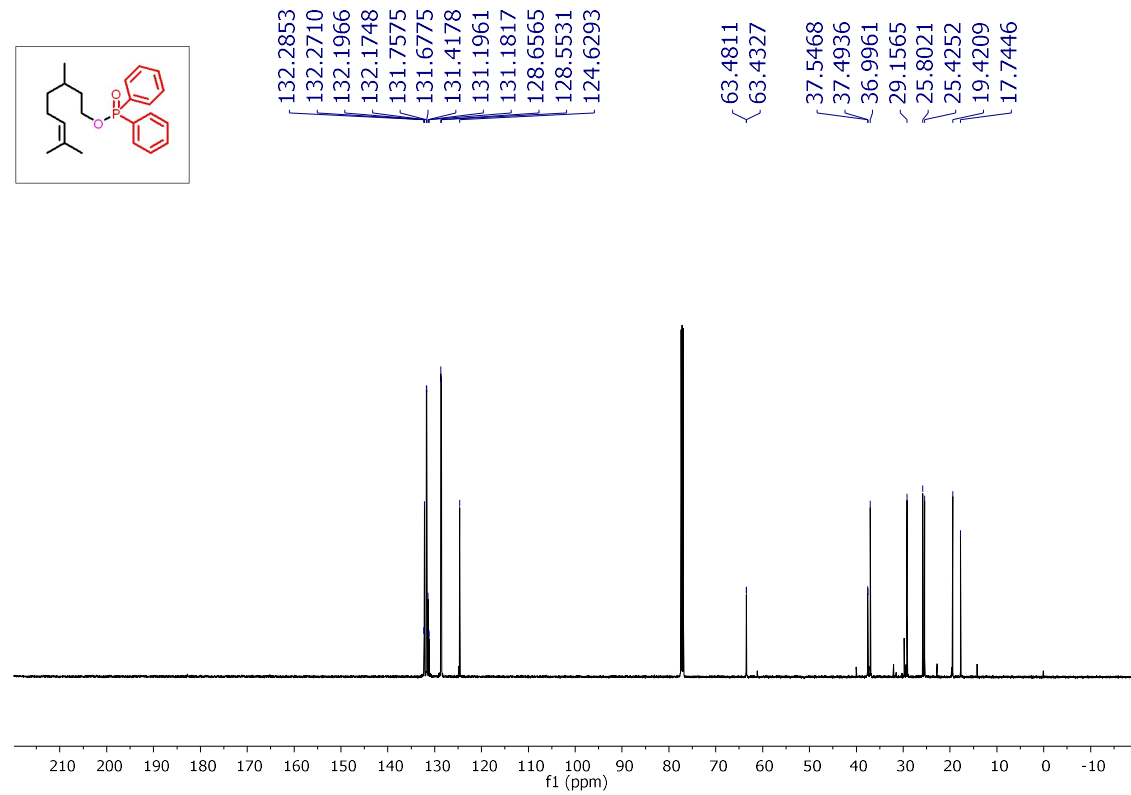

DS-HP-980-A-31P.5.fid  
DS-HP-980-A-31P

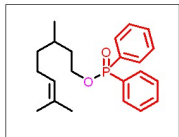

-31.2293

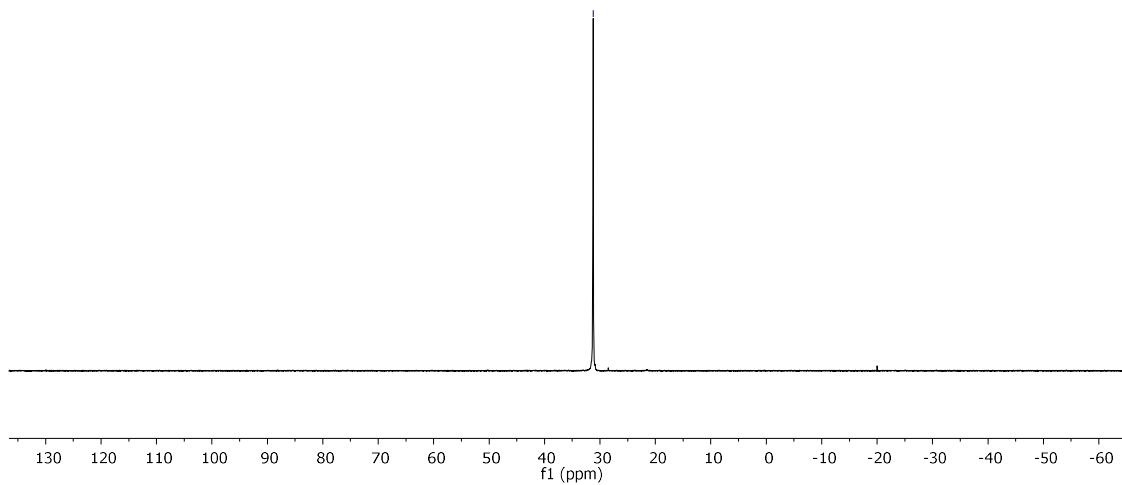

Figure S84.  $^1\text{H}$  NMR (500 MHz),  $^{13}\text{C}\{^1\text{H}\}$  NMR (125 MHz), and  $^{31}\text{P}\{^1\text{H}\}$  NMR (200 MHz) spectrum of Compound 4ai in  $\text{CDCl}_3$

2 Phenylacetone  
DS-HP-790-A

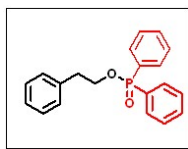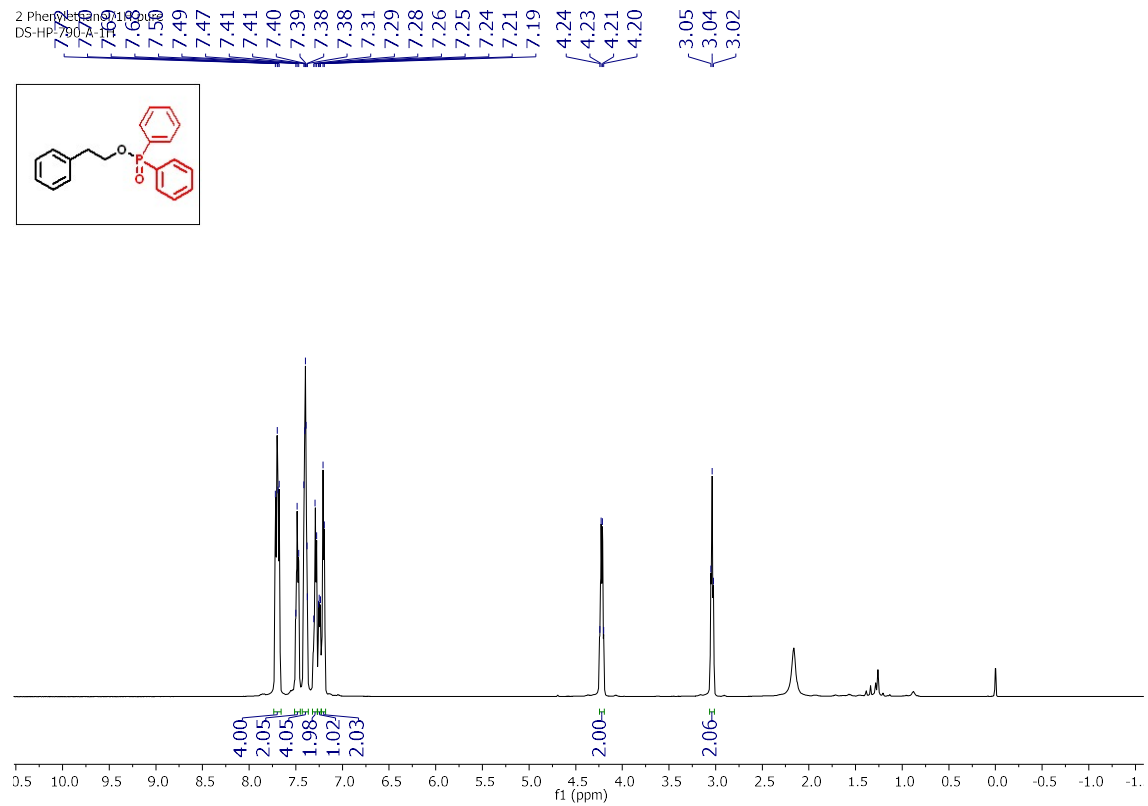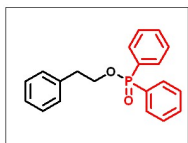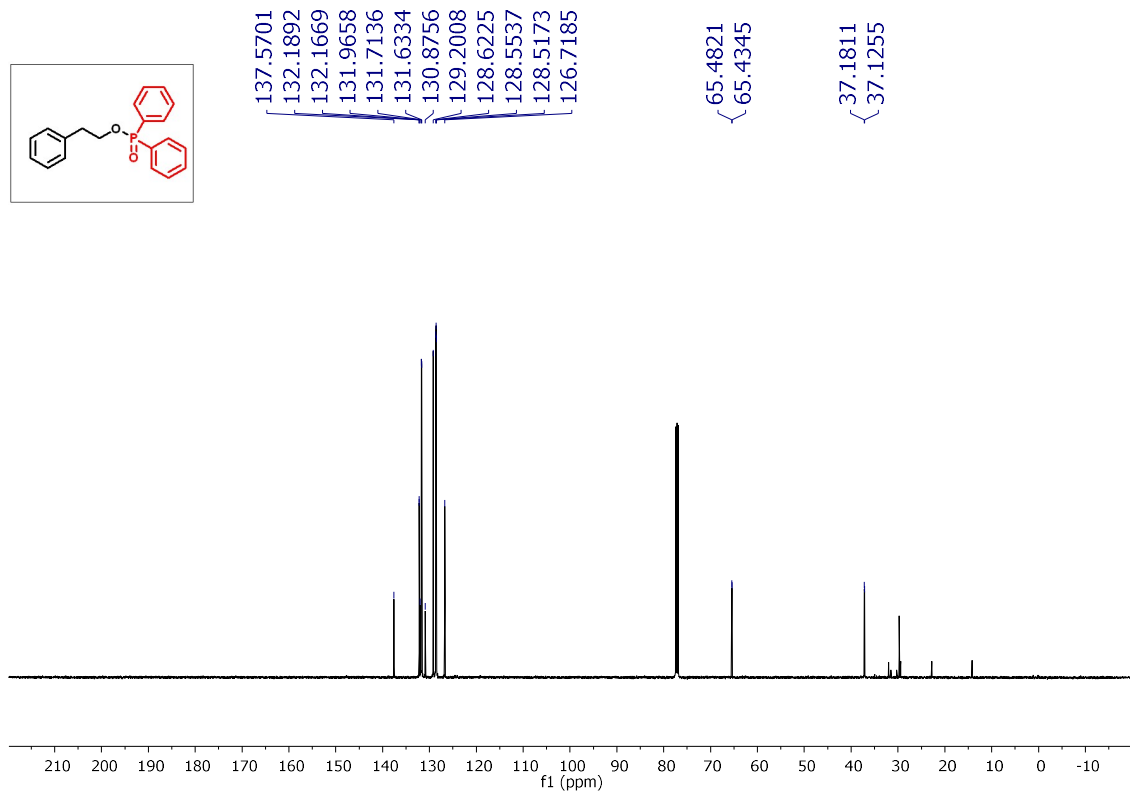

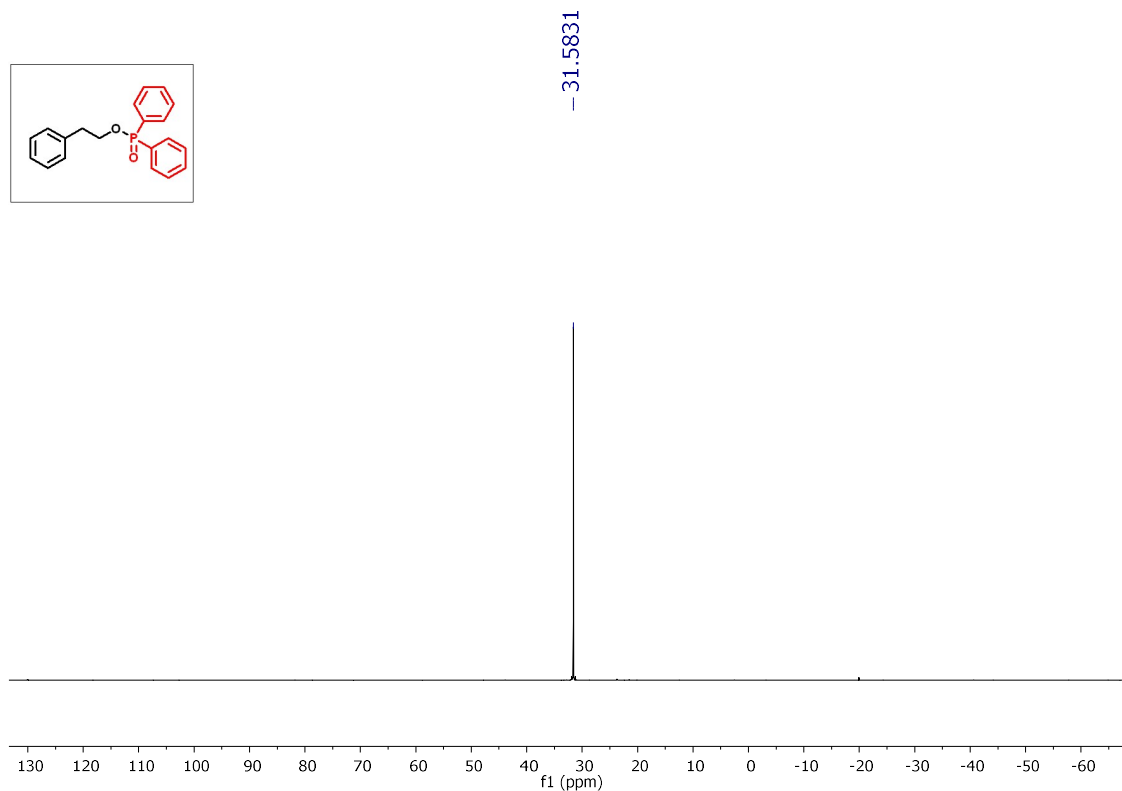

Figure S85.  $^1\text{H}$  NMR (500 MHz),  $^{13}\text{C}$   $\{^1\text{H}\}$  NMR (125 MHz), and  $^{31}\text{P}$   $\{^1\text{H}\}$  NMR (200 MHz) spectrum of Compound 4aj in  $\text{CDCl}_3$

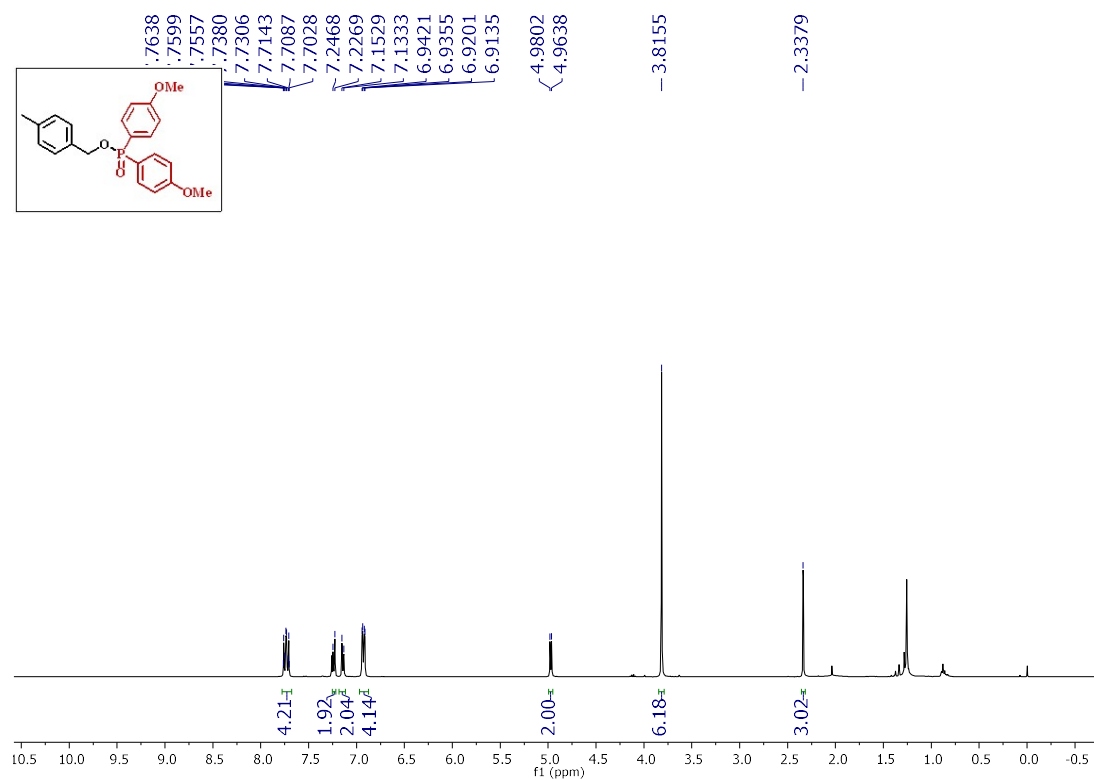

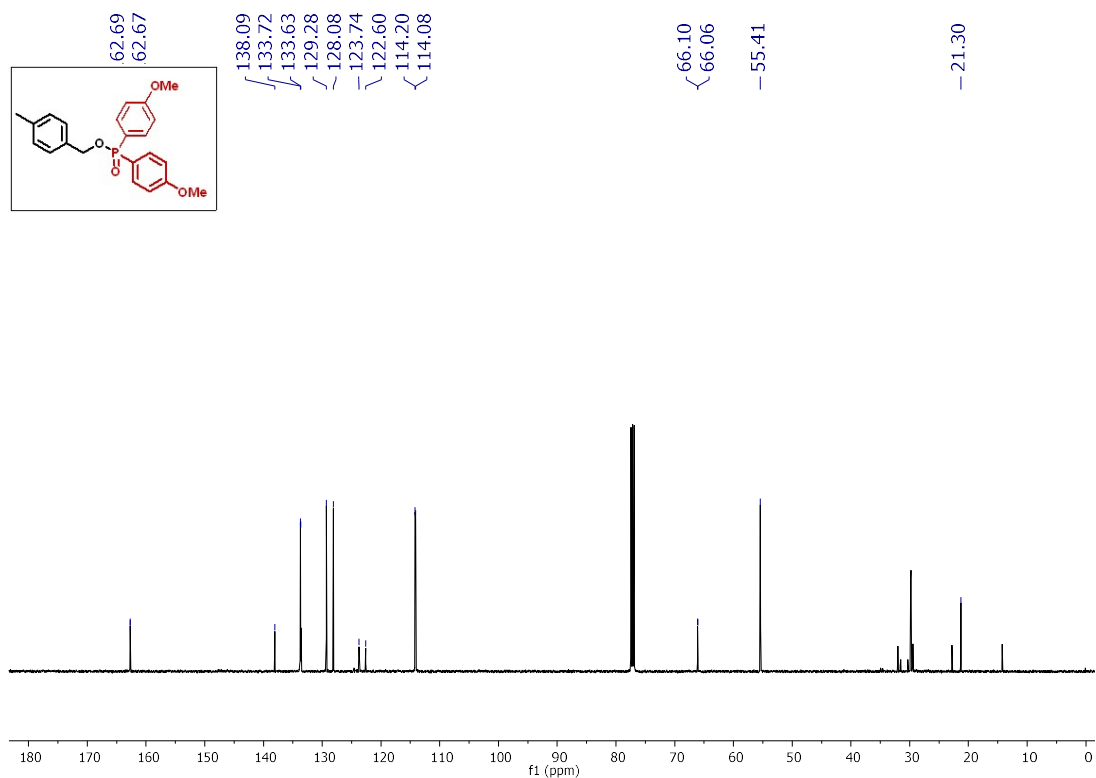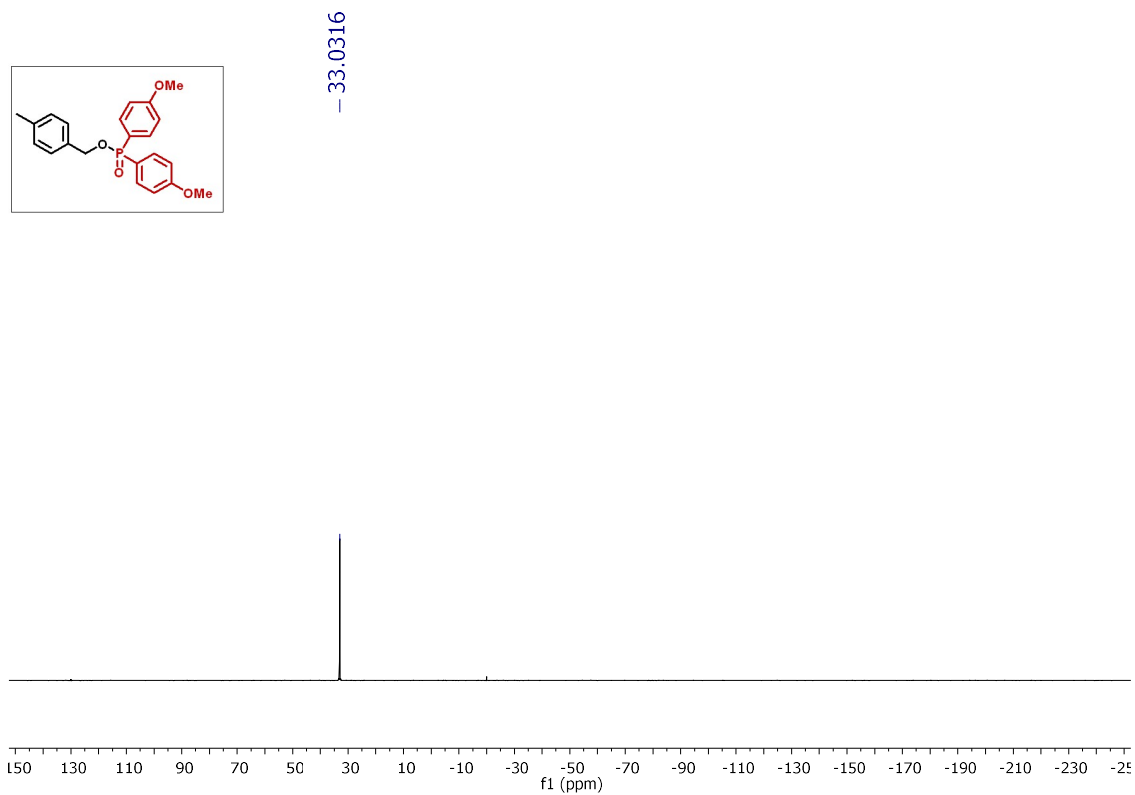

Figure S86.  $^1\text{H}$  NMR (500 MHz),  $^{13}\text{C}\{^1\text{H}\}$  NMR (125 MHz), and  $^{31}\text{P}\{^1\text{H}\}$  NMR (200 MHz) spectrum of Compound 4ak in  $\text{CDCl}_3$

DS-HP-K64-A-1H.1.fid  
DS-HP-K64-A-1H

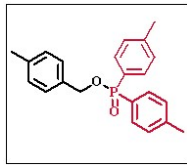

7.73  
7.71  
7.70  
7.68  
7.26  
7.25  
7.24  
7.23  
7.22  
7.16  
7.14

5.00  
4.98

2.37  
2.34

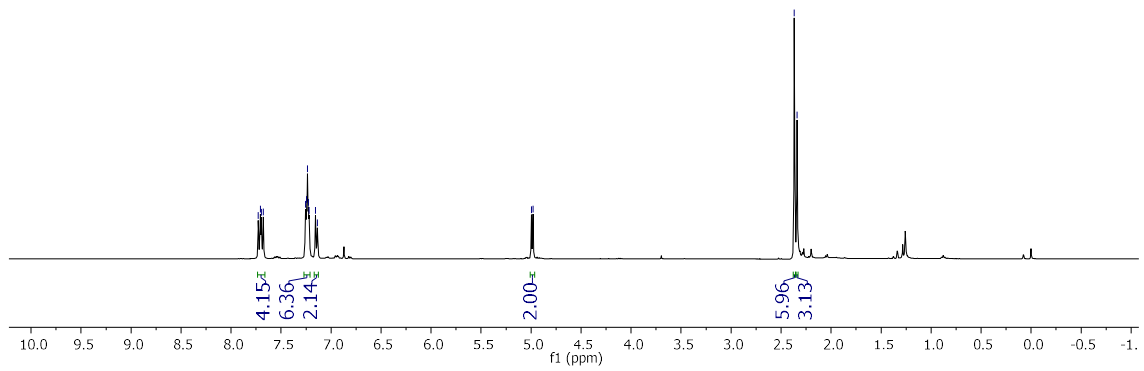

DS-HP-K64-A-13C.5.fid  
DS-HP-K64-A-13C

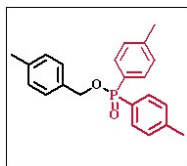

142.72  
142.70  
138.12  
133.71  
133.65  
131.87  
131.79  
129.41  
129.30  
129.29  
129.03  
128.09  
127.92

77.41  
77.16  
76.91  
66.18  
66.14

21.73  
21.31

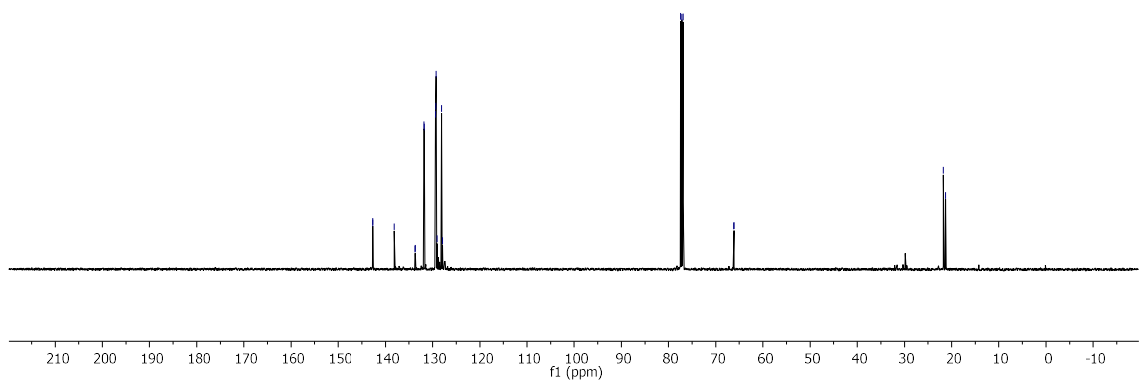

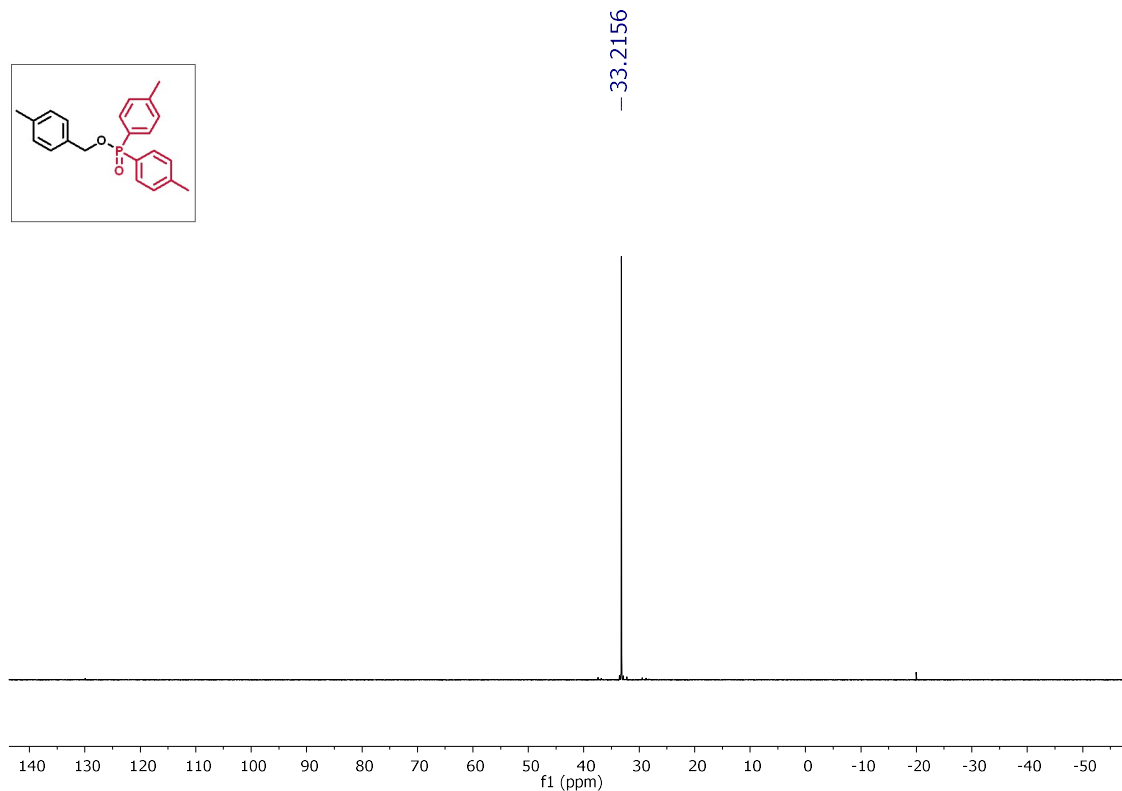

Figure S87.  $^1\text{H}$  NMR (500 MHz),  $^{13}\text{C}$   $\{^1\text{H}\}$  NMR (125 MHz), and  $^{31}\text{P}$   $\{^1\text{H}\}$  NMR (200 MHz) spectrum of Compound 4al in  $\text{CDCl}_3$

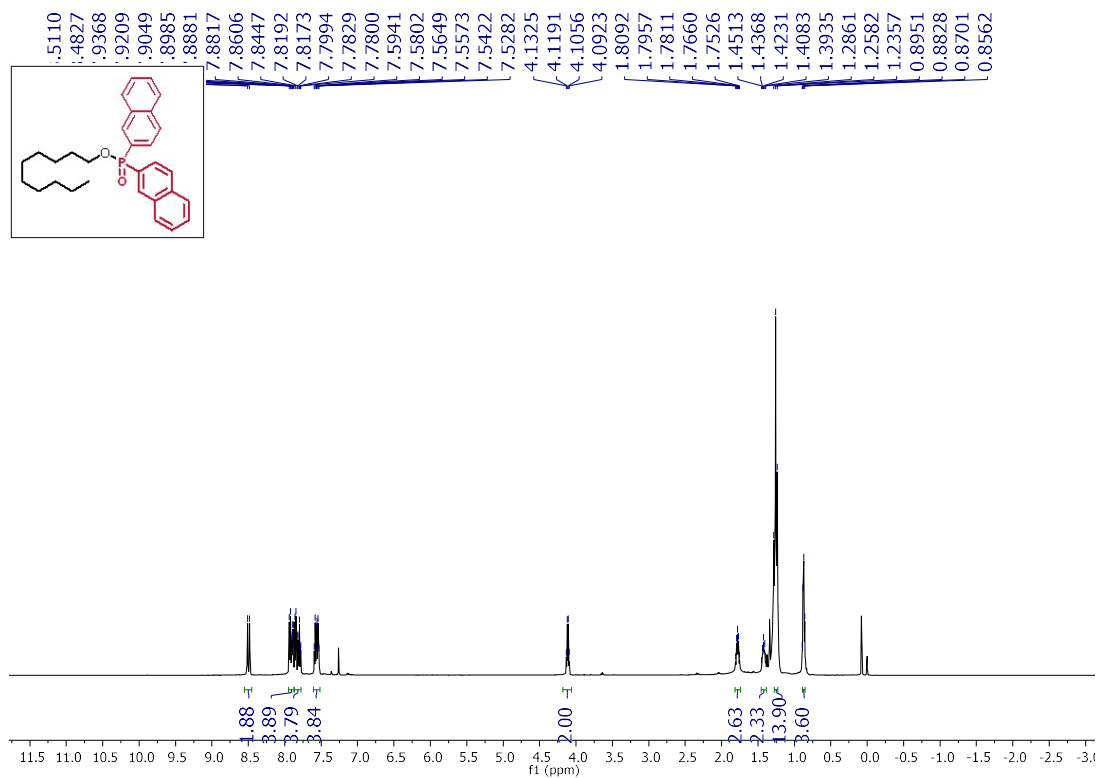

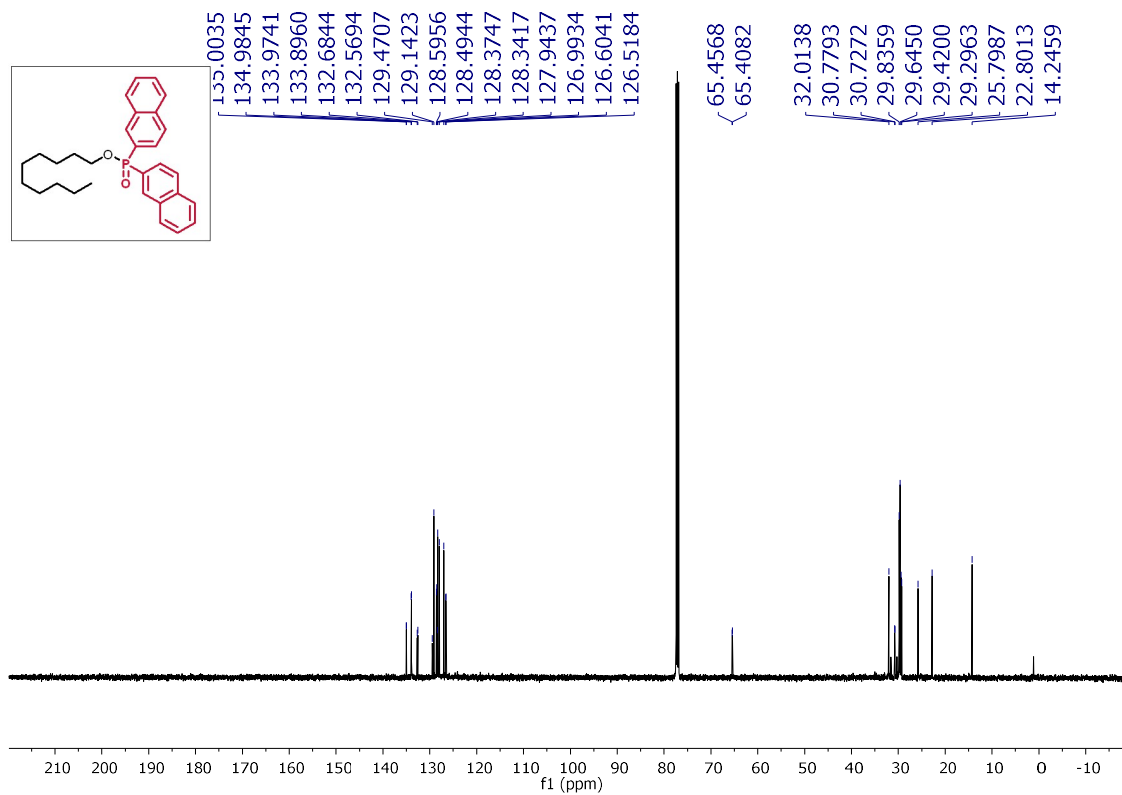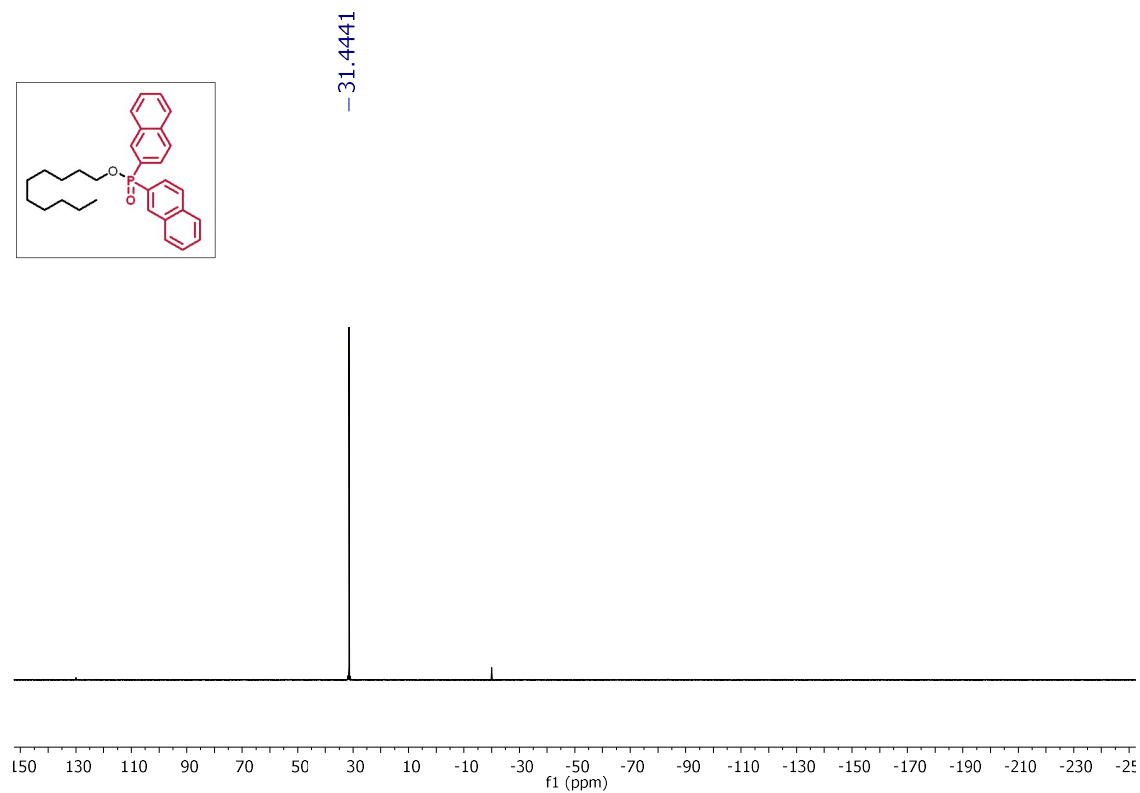

Figure S88.  $^1\text{H}$  NMR (500 MHz),  $^{13}\text{C}\{^1\text{H}\}$  NMR (125 MHz), and  $^{31}\text{P}\{^1\text{H}\}$  NMR (200 MHz) spectrum of Compound 4am in  $\text{CDCl}_3$

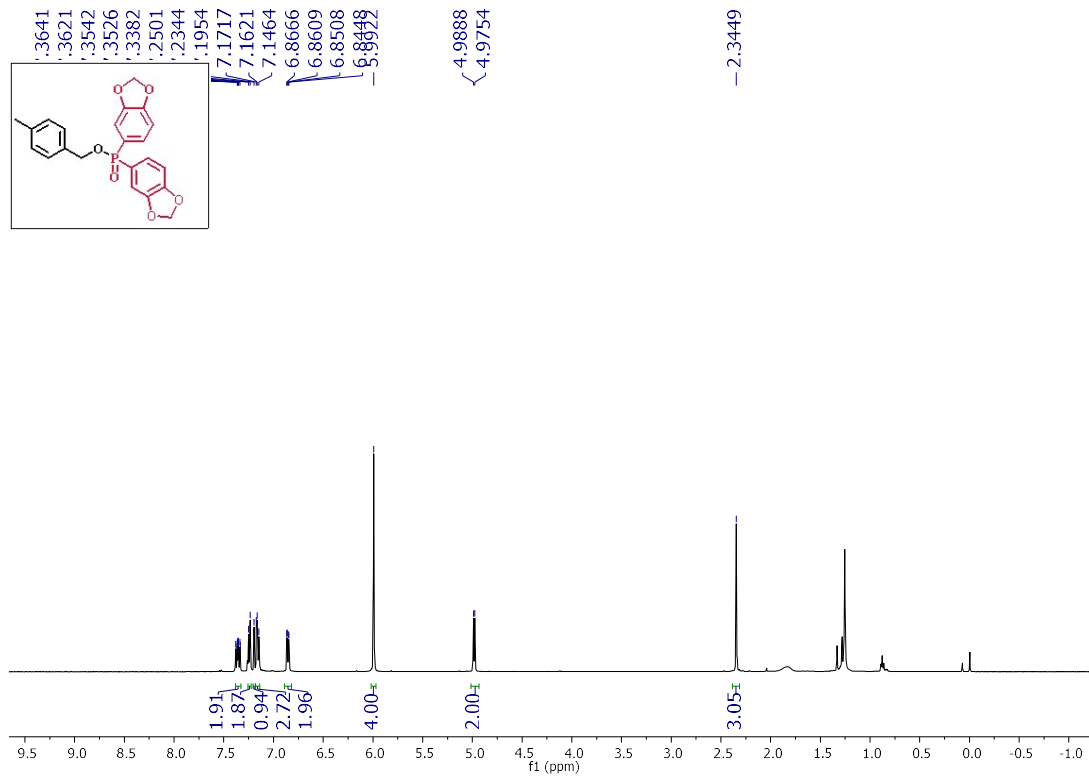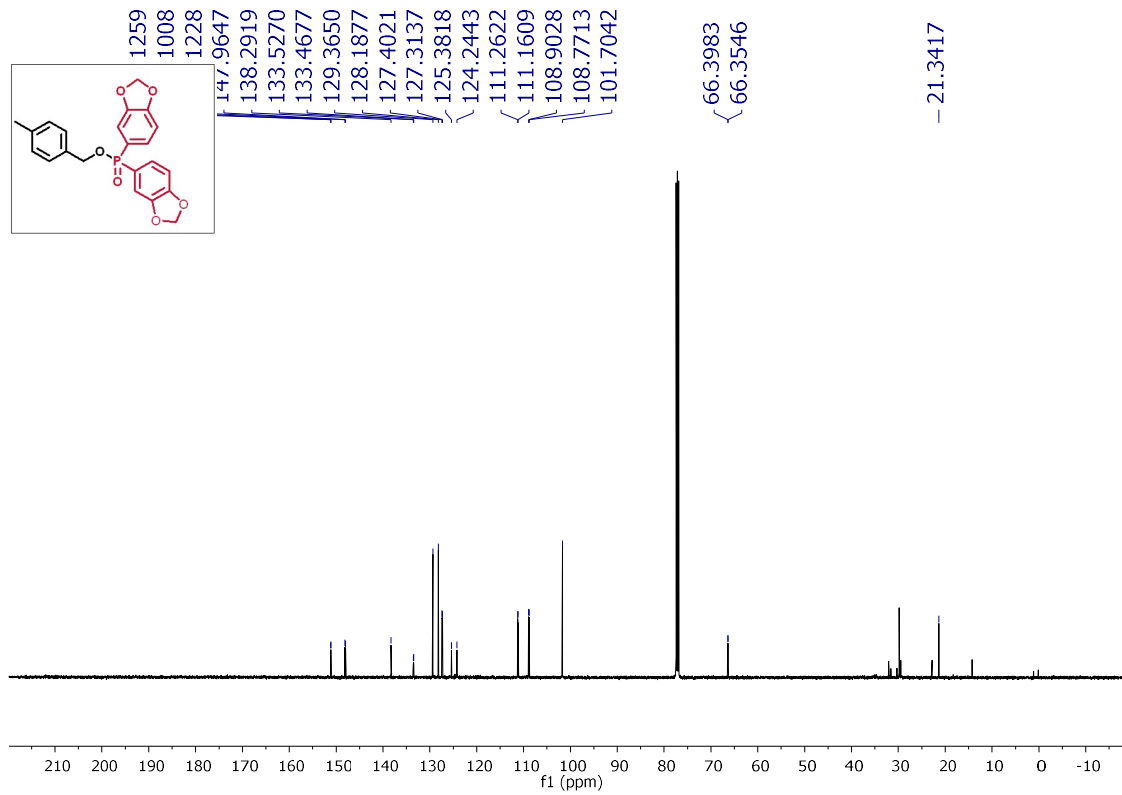

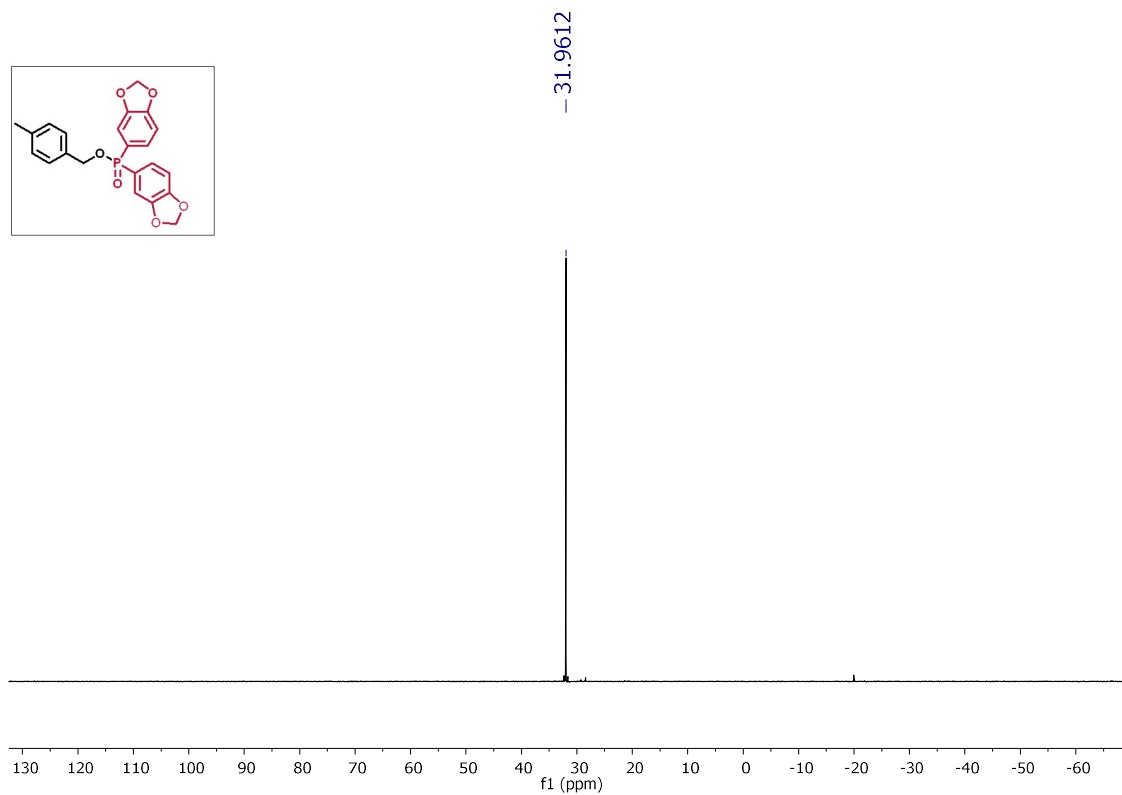

Figure S89.  $^1\text{H}$  NMR (500 MHz),  $^{13}\text{C}$   $\{^1\text{H}\}$  NMR (125 MHz), and  $^{31}\text{P}$   $\{^1\text{H}\}$  NMR (200 MHz) spectrum of Compound 4an in  $\text{CDCl}_3$

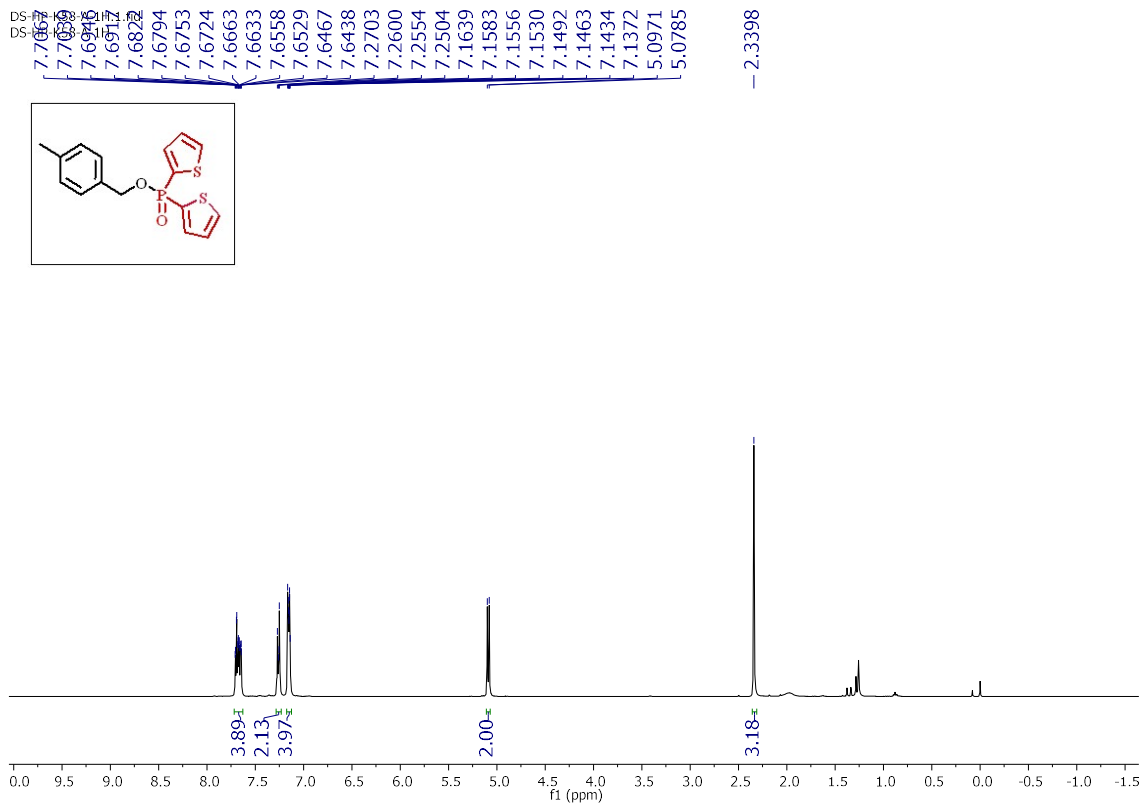

DS-HP-K56-A-13C:7.fid  
DS-HP-K56-A-13C

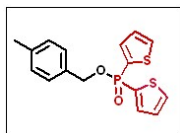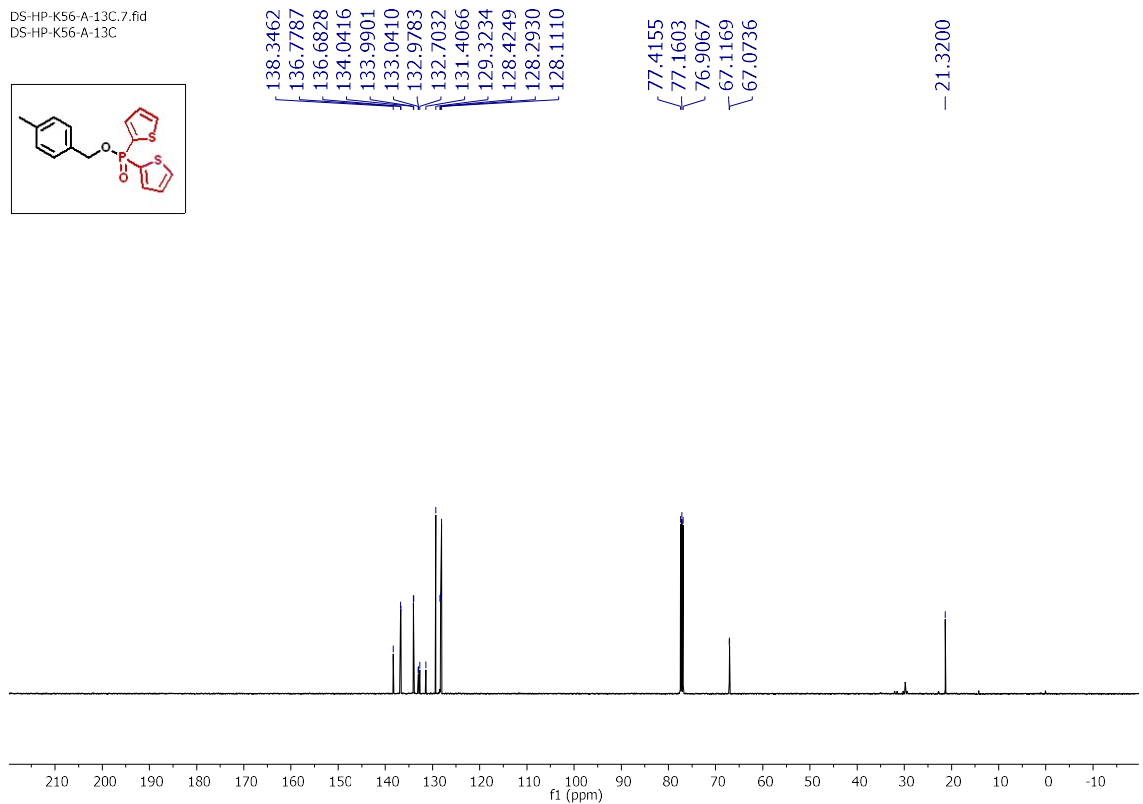

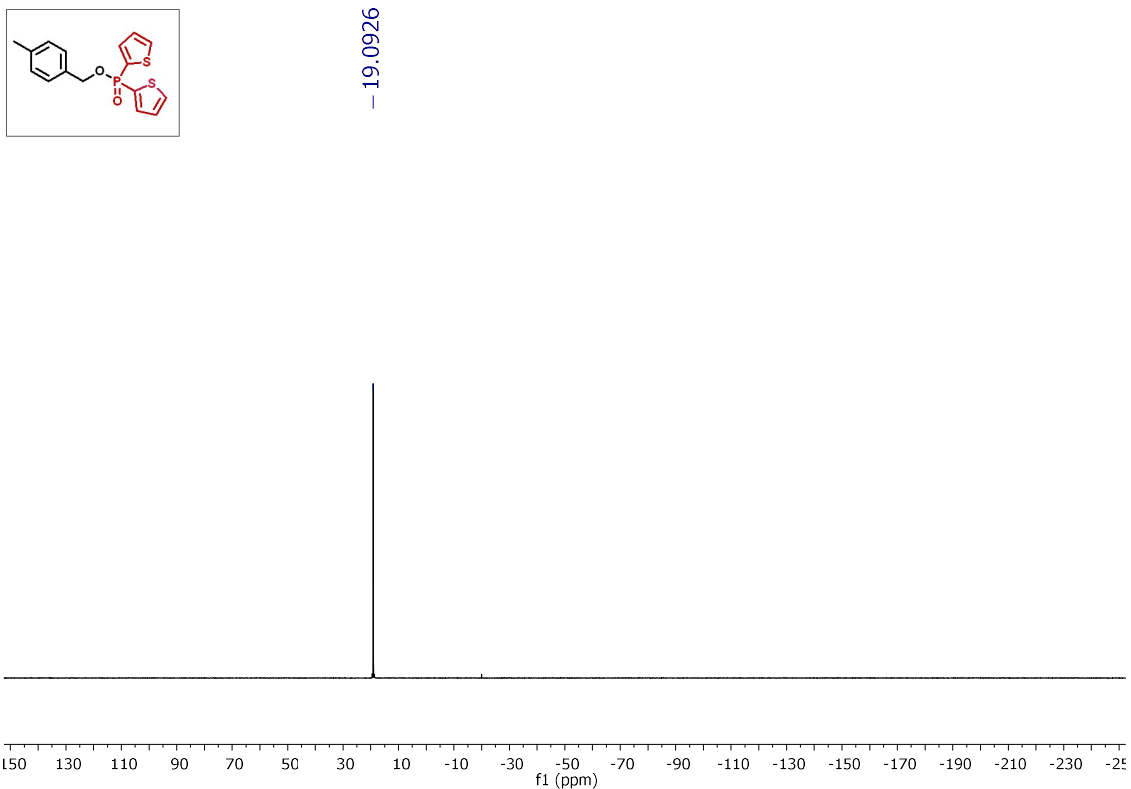

Figure S90.  $^1\text{H}$  NMR (500 MHz),  $^{13}\text{C}\{^1\text{H}\}$  NMR (125 MHz), and  $^{31}\text{P}\{^1\text{H}\}$  NMR (200 MHz) spectrum of Compound 4ao in  $\text{CDCl}_3$

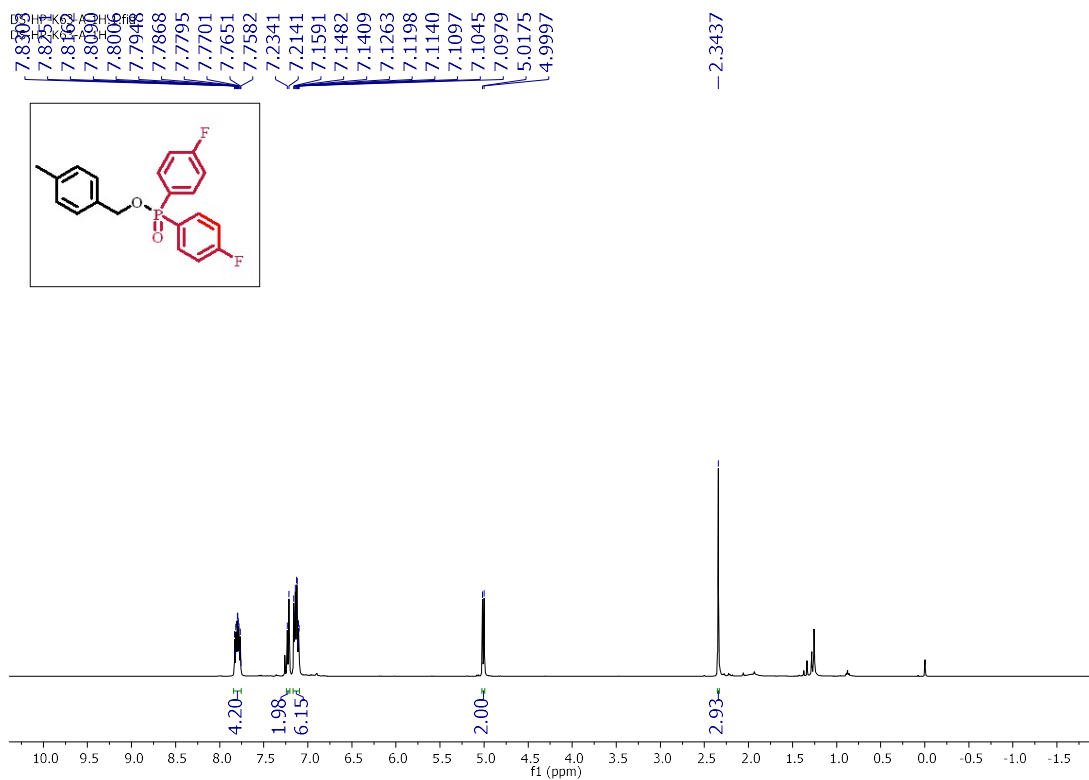

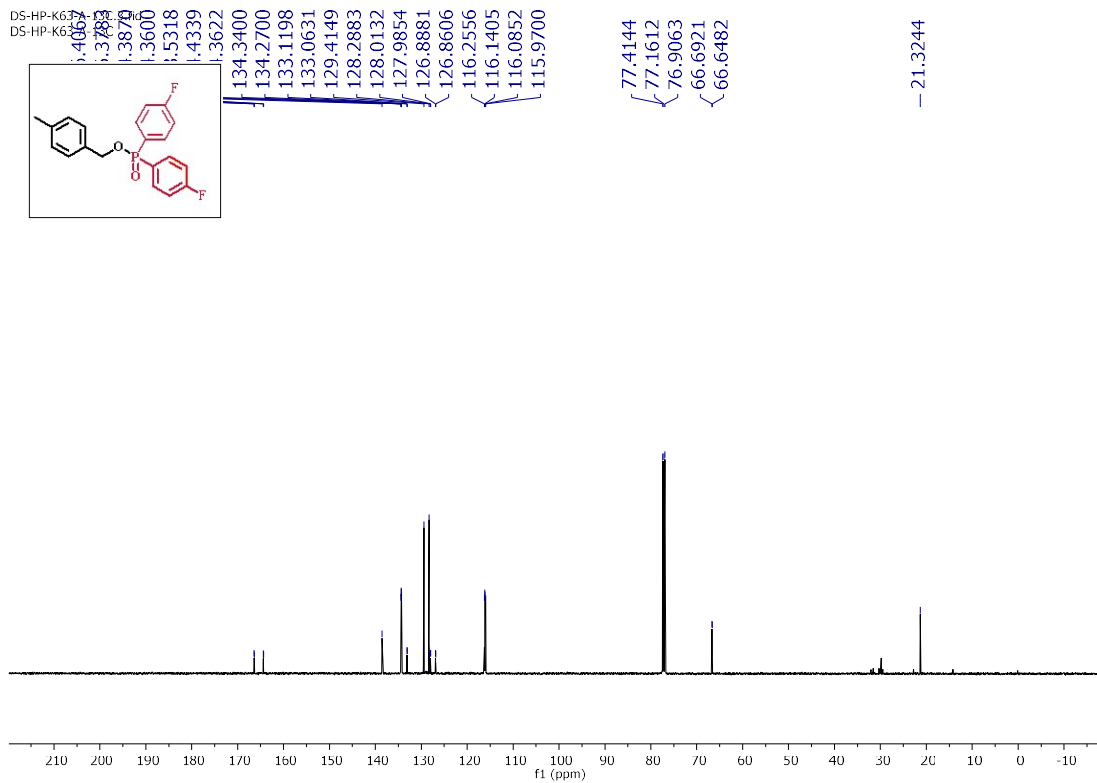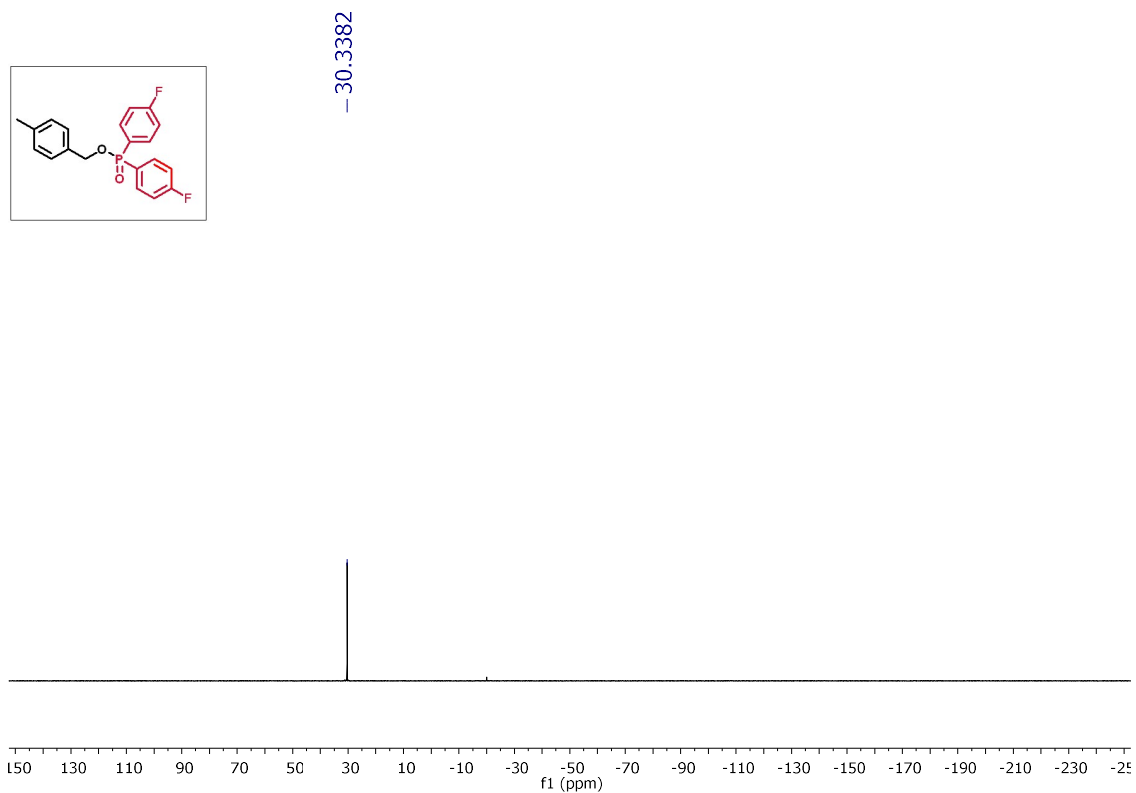

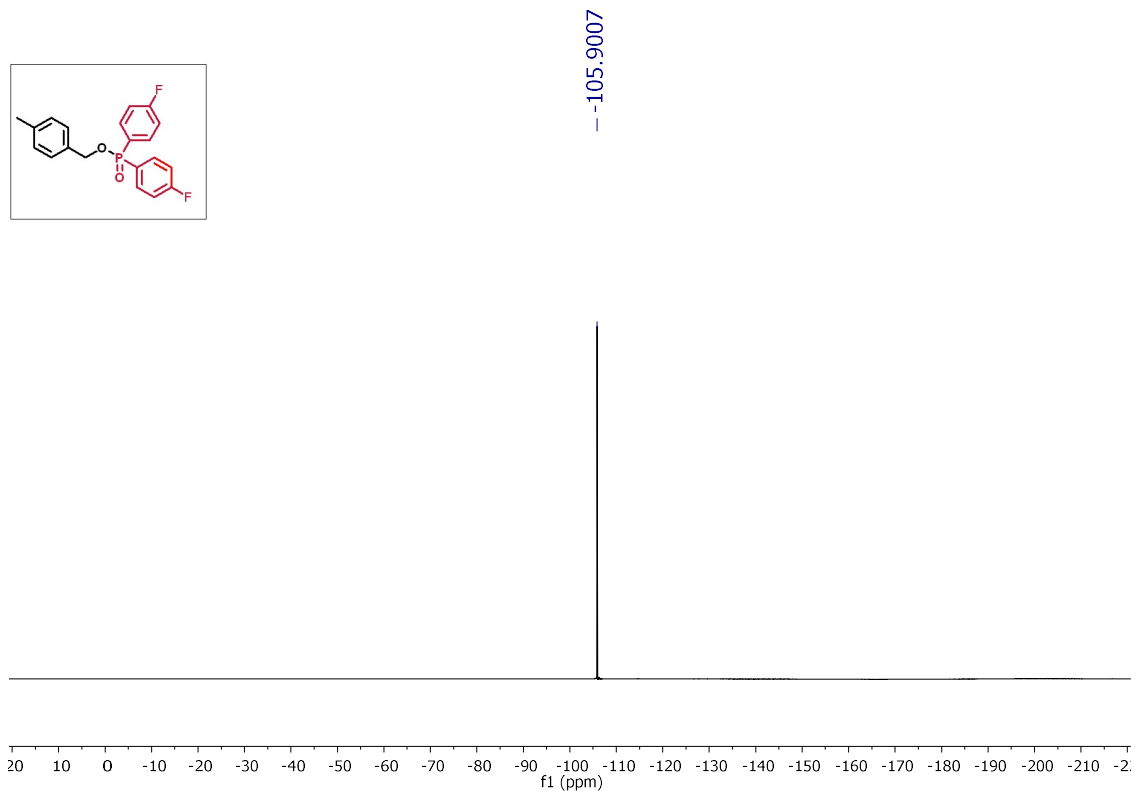

Figure S91.  $^1\text{H}$  NMR (500 MHz),  $^{13}\text{C}$   $\{^1\text{H}\}$  NMR (125 MHz), and  $^{31}\text{P}$   $\{^1\text{H}\}$  NMR (200 MHz)  $^{19}\text{F}$   $\{^1\text{H}\}$  NMR (402 MHz) spectrum of Compound 4ap in  $\text{CDCl}_3$ .

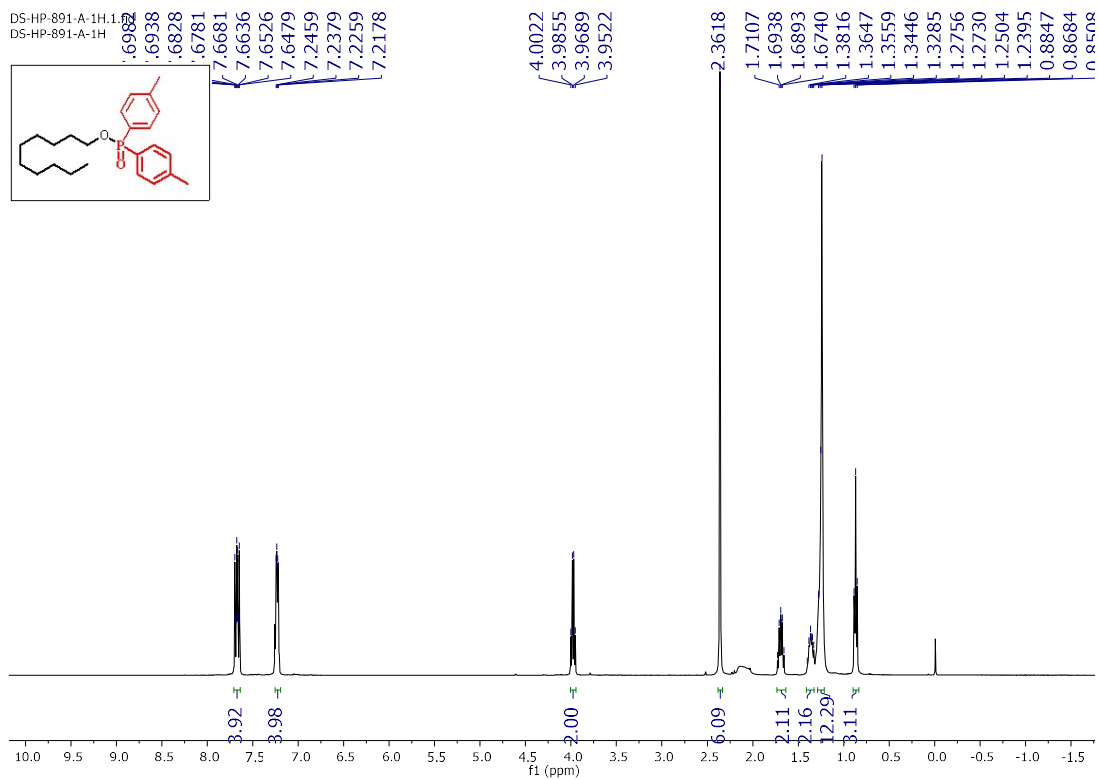

DS-HP-891-A-13C.3.fid  
DS-HP-891-A-13C

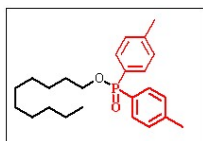

142.5675  
142.5445  
131.7816  
131.6980  
129.3704  
129.3340  
129.2639  
128.2236  
77.4149  
77.1609  
76.9069  
64.9722  
64.9242  
31.9950  
30.6930  
30.6408  
29.6212  
29.6046  
29.3951  
29.2596  
25.7331  
22.7751  
21.7029  
14.2068

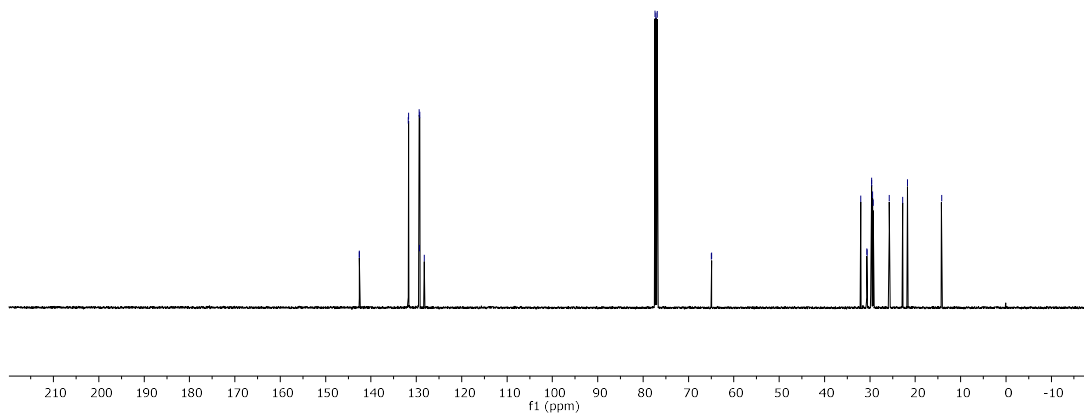

DS-HP-891-A-31P.5.fid  
DS-HP-891-A-31P

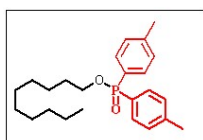

-32.11

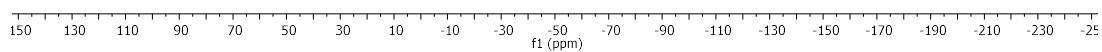

Figure S92.  $^1\text{H}$  NMR (500 MHz),  $^{13}\text{C}\{^1\text{H}\}$  NMR (125 MHz), and  $^{31}\text{P}\{^1\text{H}\}$  NMR (200 MHz) spectrum of Compound 4aq in  $\text{CDCl}_3$

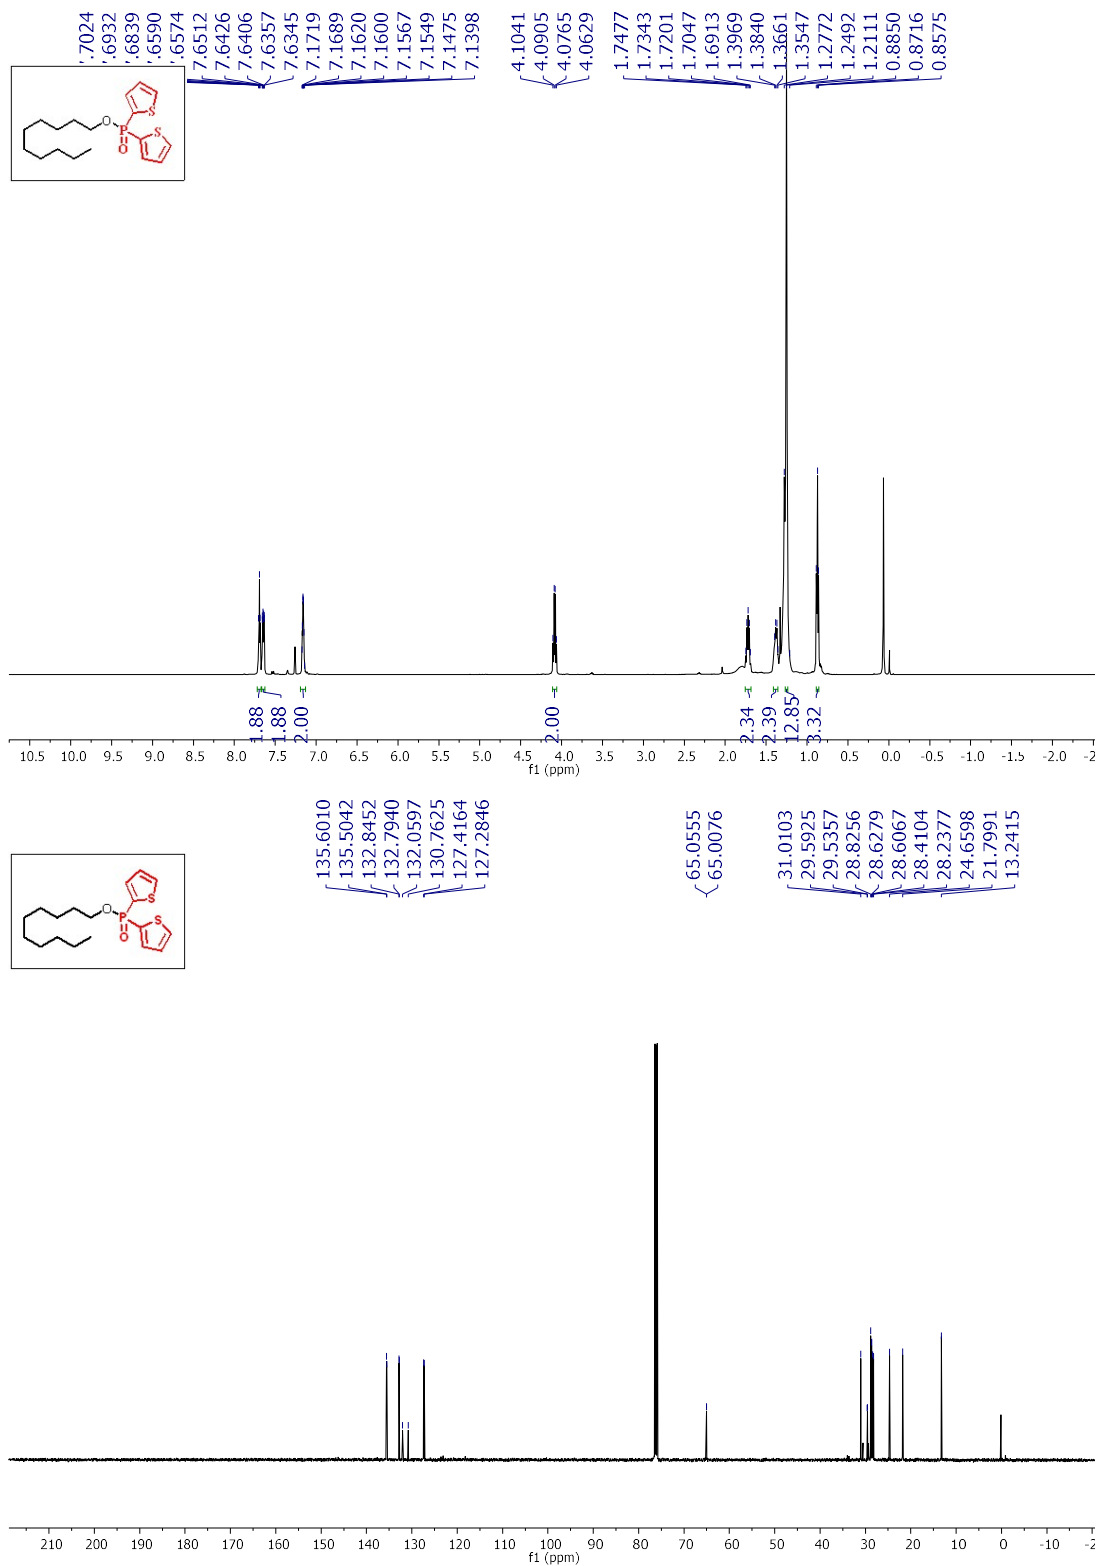

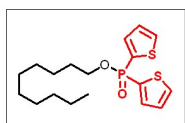

-18.3414

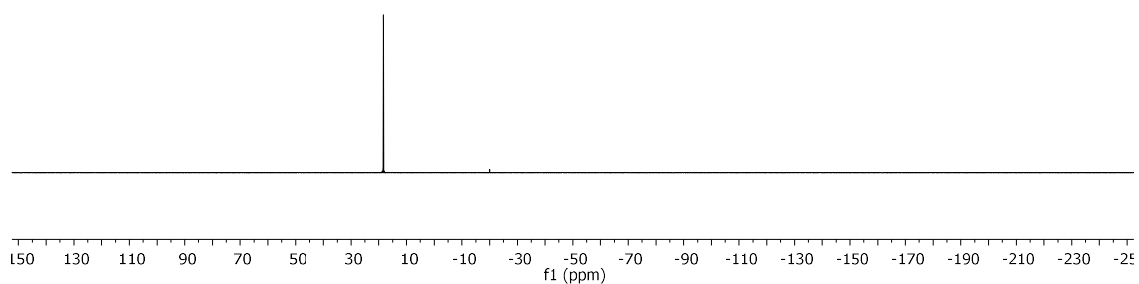

Figure S93.  $^1\text{H}$  NMR (500 MHz),  $^{13}\text{C}\{^1\text{H}\}$  NMR (125 MHz), and  $^{31}\text{P}\{^1\text{H}\}$  NMR (200 MHz) spectrum of Compound 4ar in  $\text{CDCl}_3$

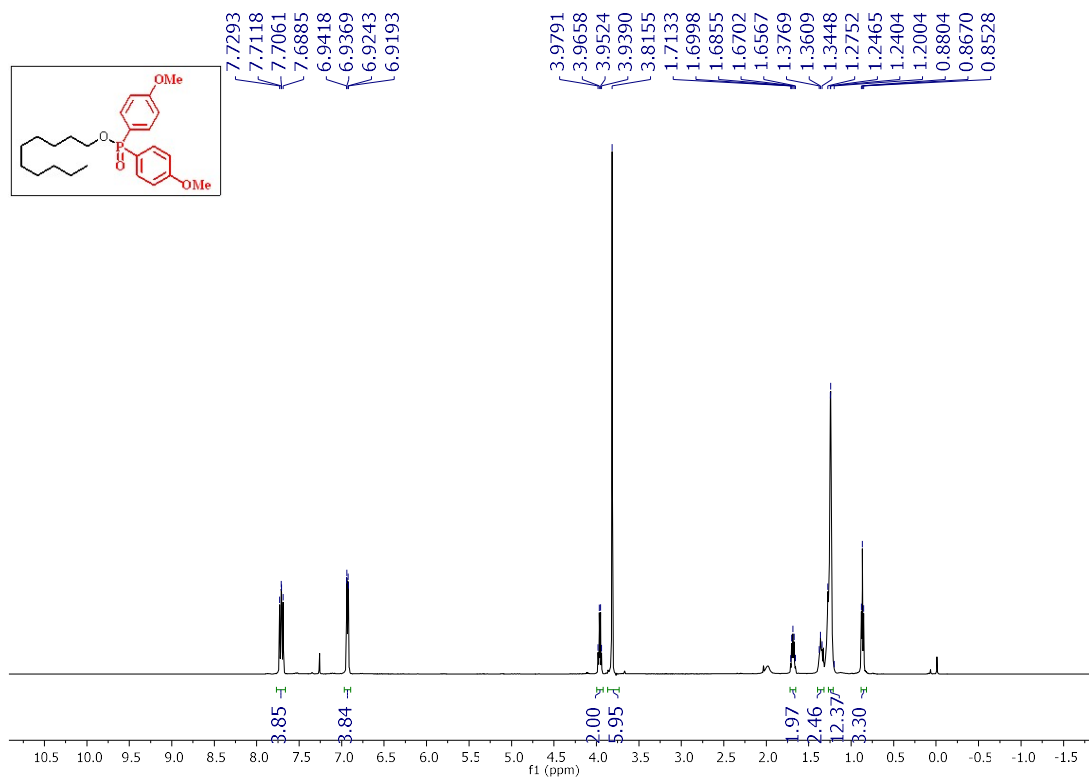

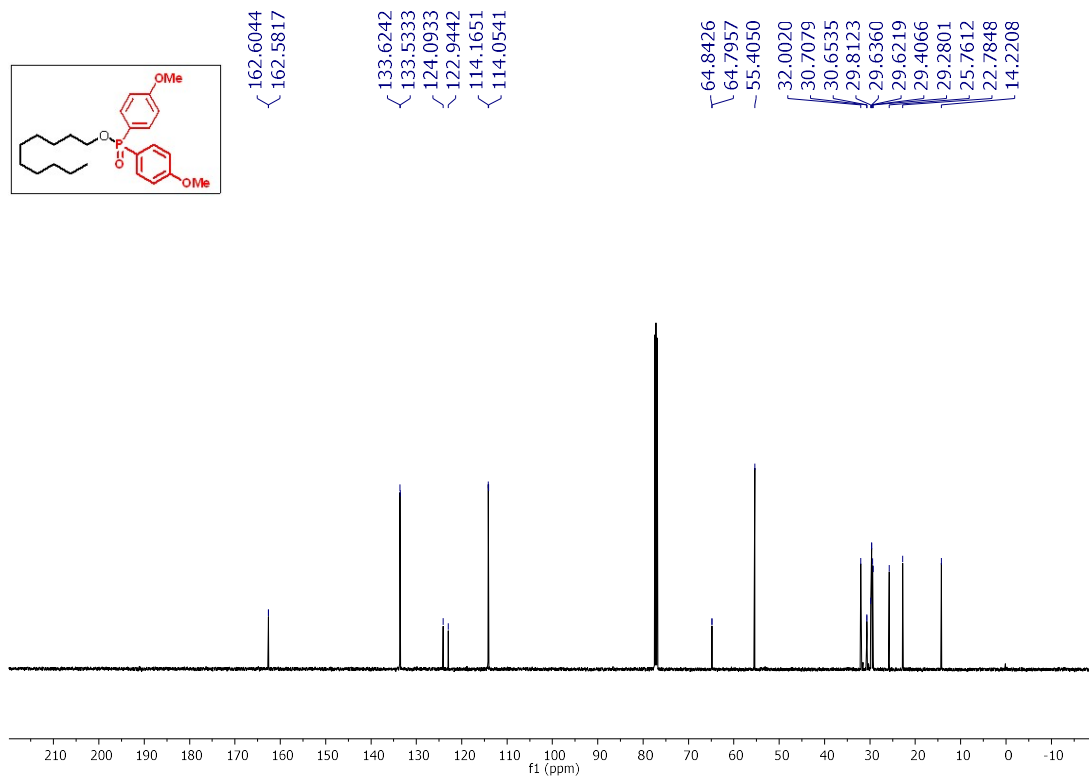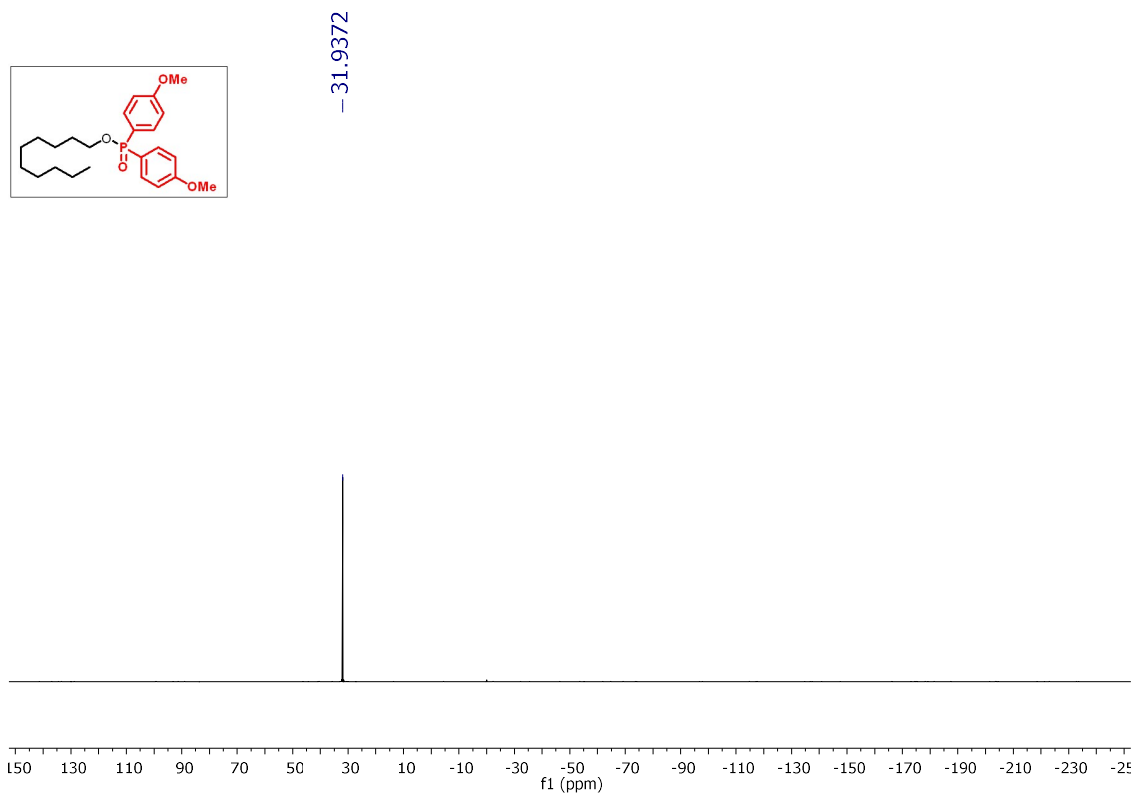

Figure S94.  $^1\text{H}$  NMR (500 MHz),  $^{13}\text{C}$   $\{^1\text{H}\}$  NMR (125 MHz), and  $^{31}\text{P}$   $\{^1\text{H}\}$  NMR (200 MHz) spectrum of Compound 4as in  $\text{CDCl}_3$

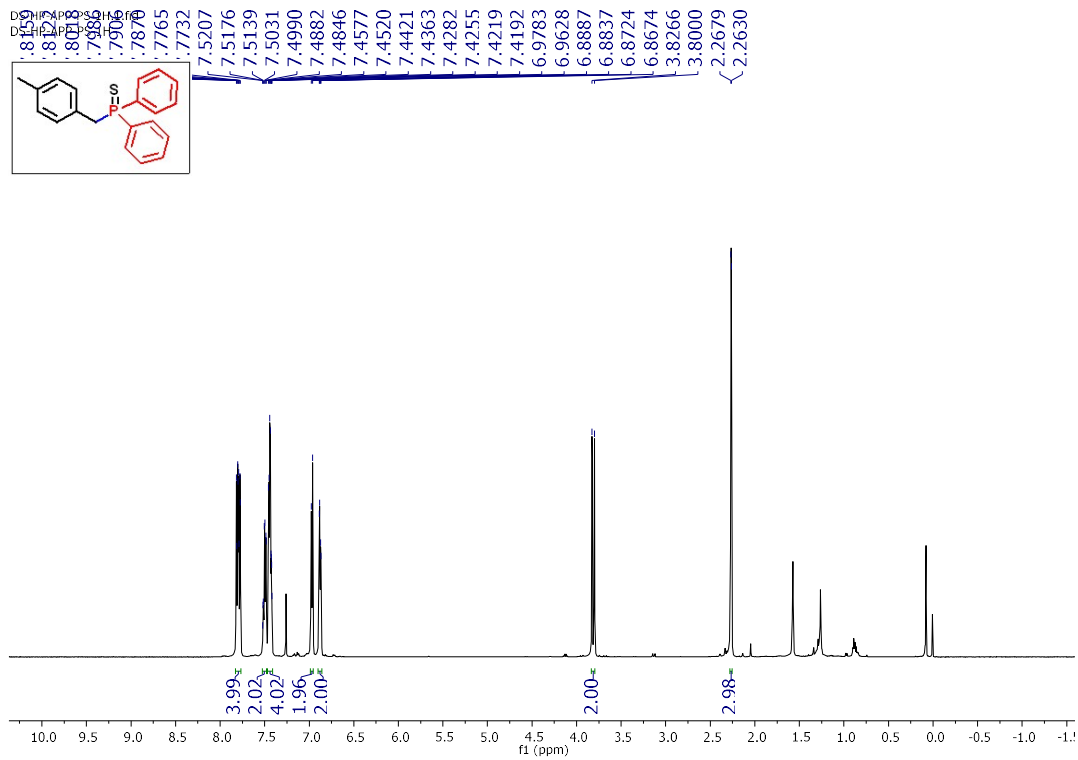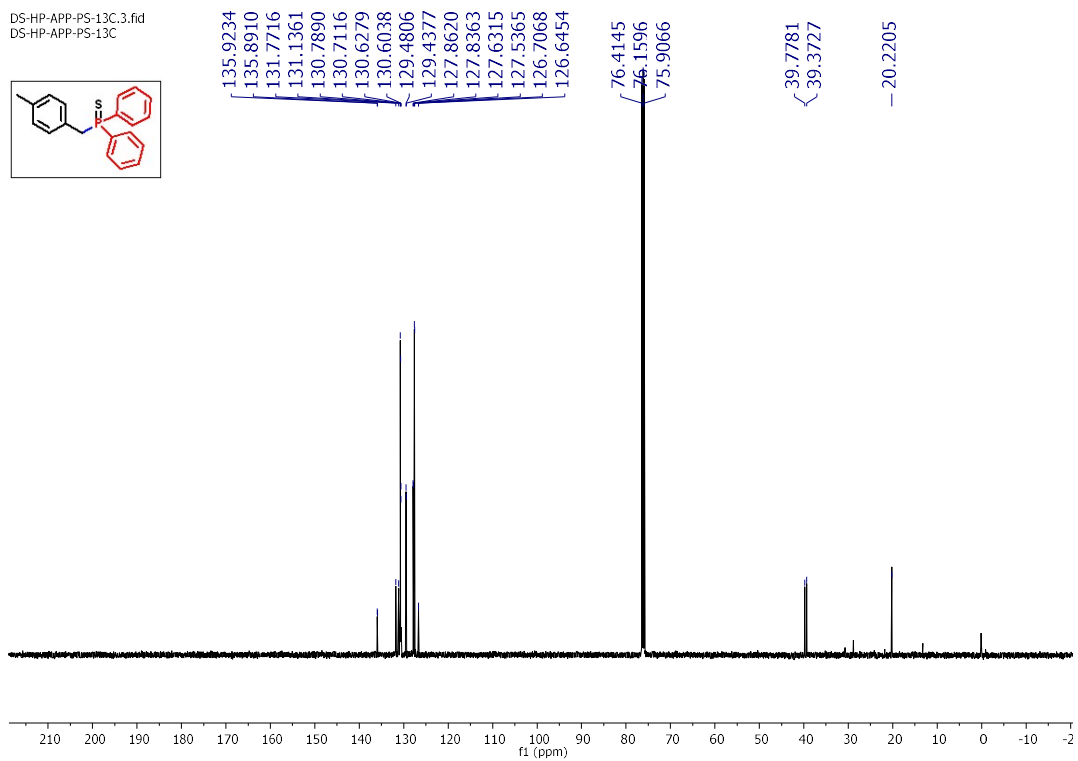

DS-HP-APP-PS-31P.5.fid  
DS-HP-APP-PS-31P

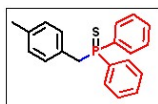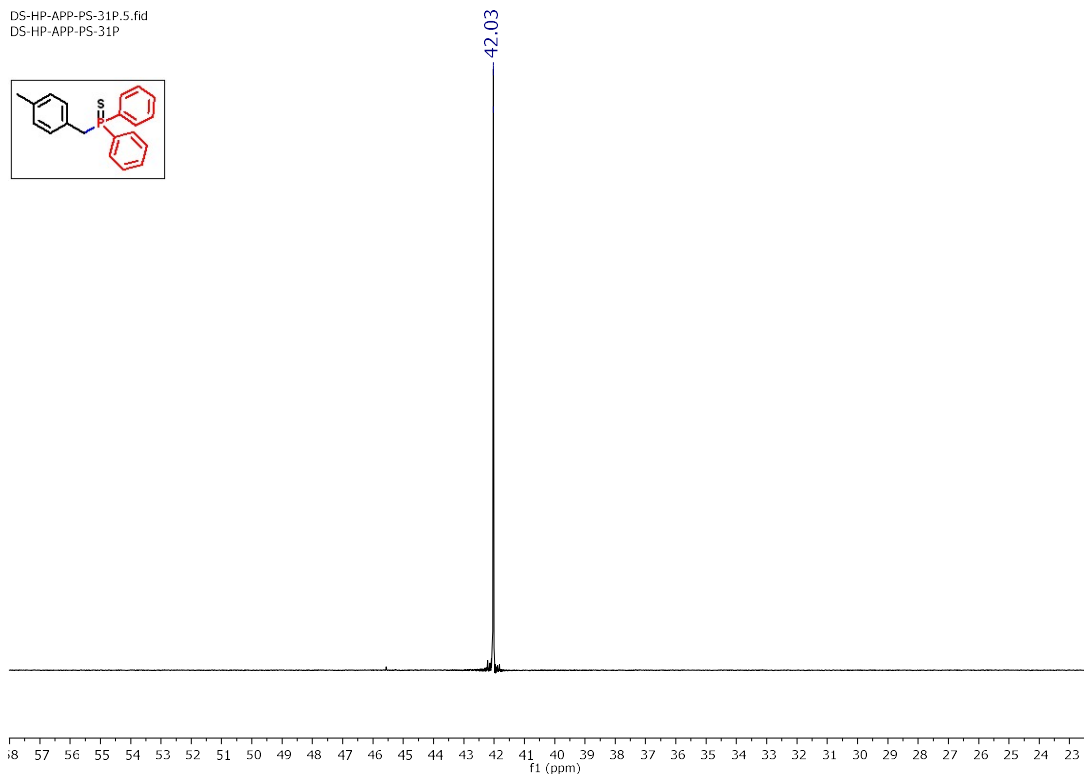

Figure S95.  $^1\text{H}$  NMR (500 MHz),  $^{13}\text{C}\{^1\text{H}\}$  NMR (125 MHz), and  $^{31}\text{P}\{^1\text{H}\}$  NMR (200 MHz) spectrum of Compound 6 in  $\text{CDCl}_3$

DS-HP-852-111  
DS-HP-852-111

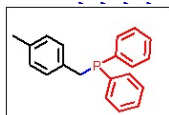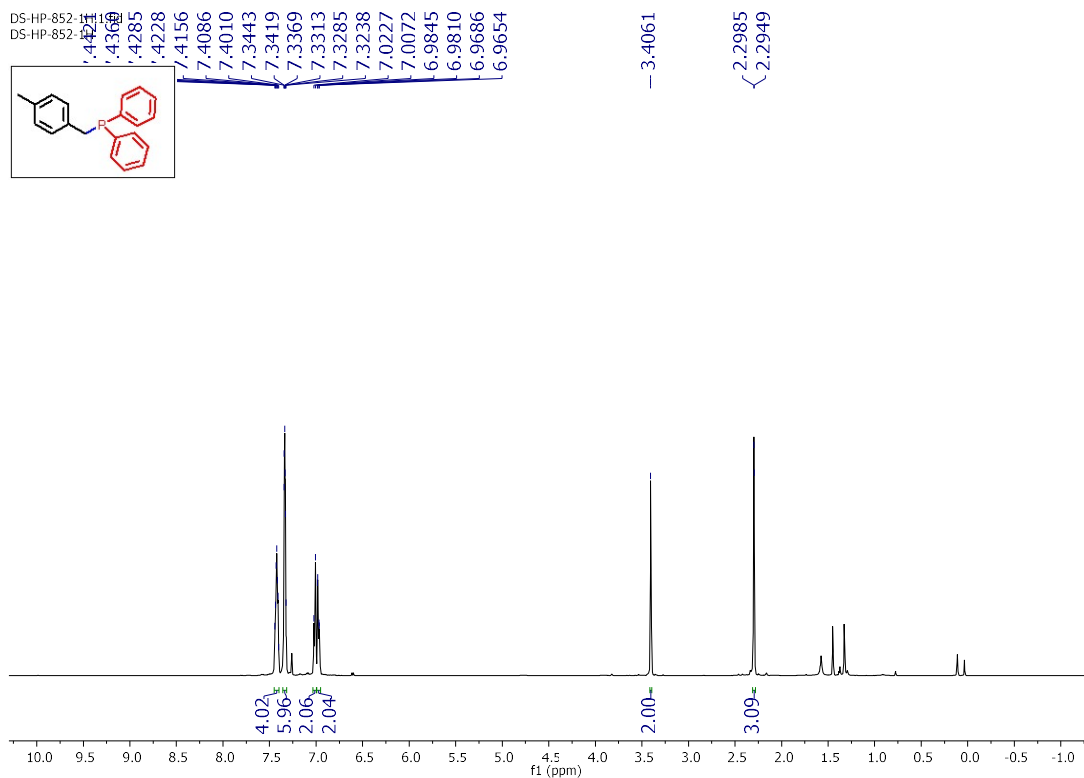

DS-HP-852-13C.3.fid  
DS-HP-852-13C

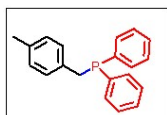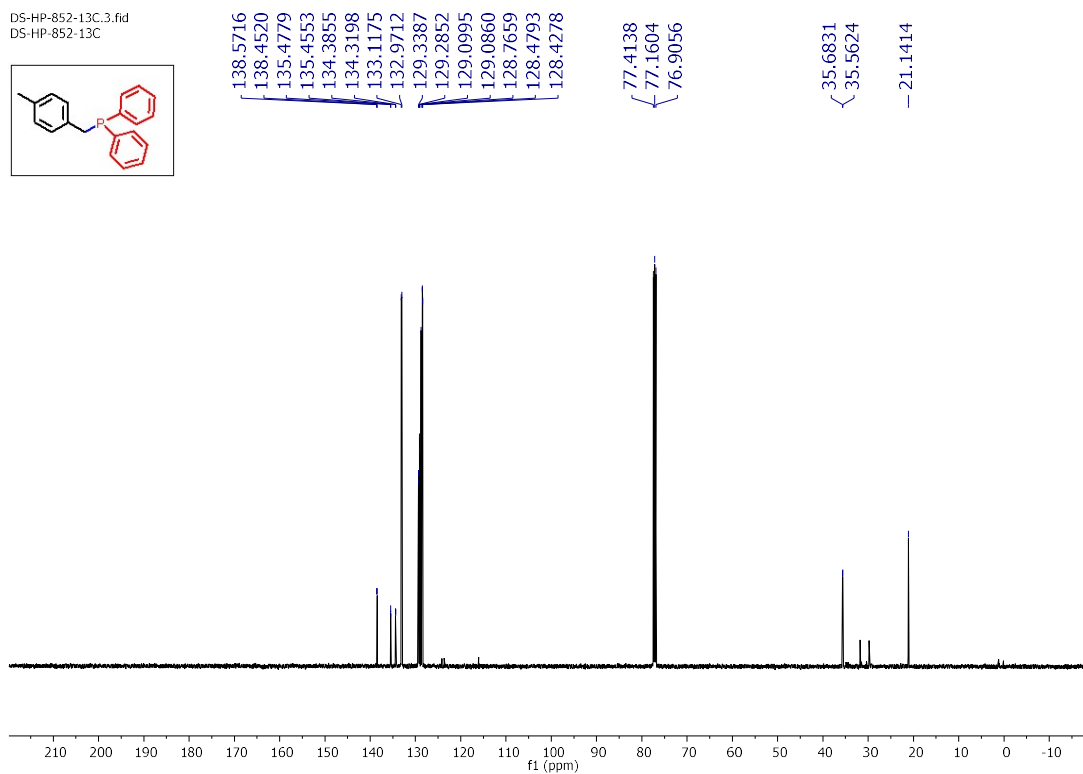

DS-HP-852-31P.5.fid  
DS-HP-852-31P

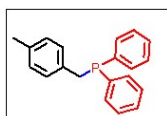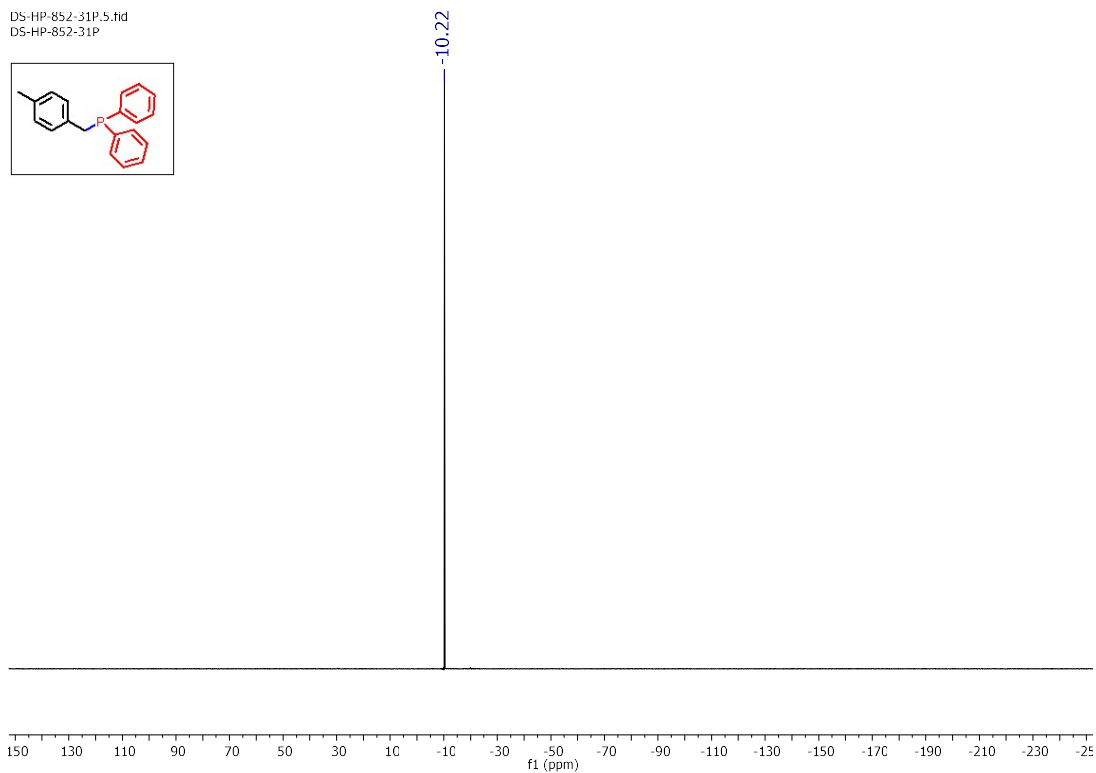

Figure S96.  $^1\text{H}$  NMR (500 MHz),  $^{13}\text{C}\{^1\text{H}\}$  NMR (125 MHz), and  $^{31}\text{P}\{^1\text{H}\}$  NMR (200 MHz) spectrum of Compound 5 in  $\text{CDCl}_3$

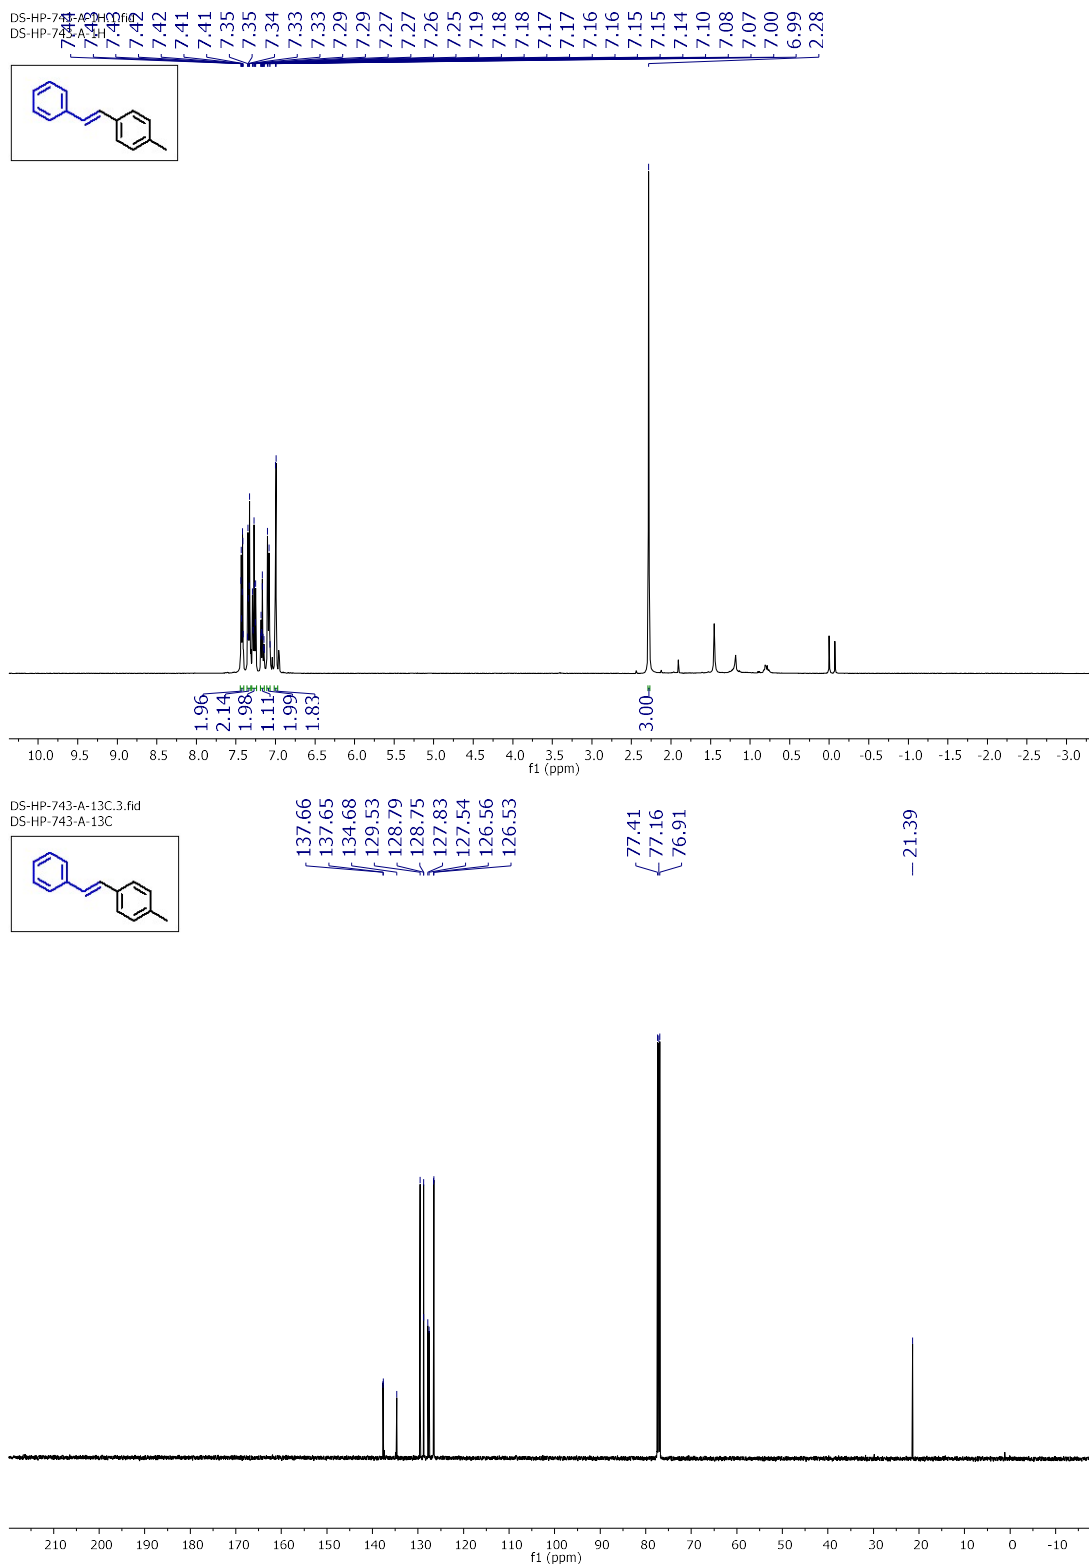

Figure S97. <sup>1</sup>H NMR (500 MHz), <sup>13</sup>C {<sup>1</sup>H} NMR (125 MHz), and <sup>31</sup>P {<sup>1</sup>H} NMR (200 MHz) spectrum of Compound 8 in CDCl<sub>3</sub>

DS-HP-821-1H.1.fid  
DS-HP-821-1H

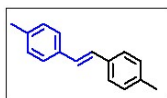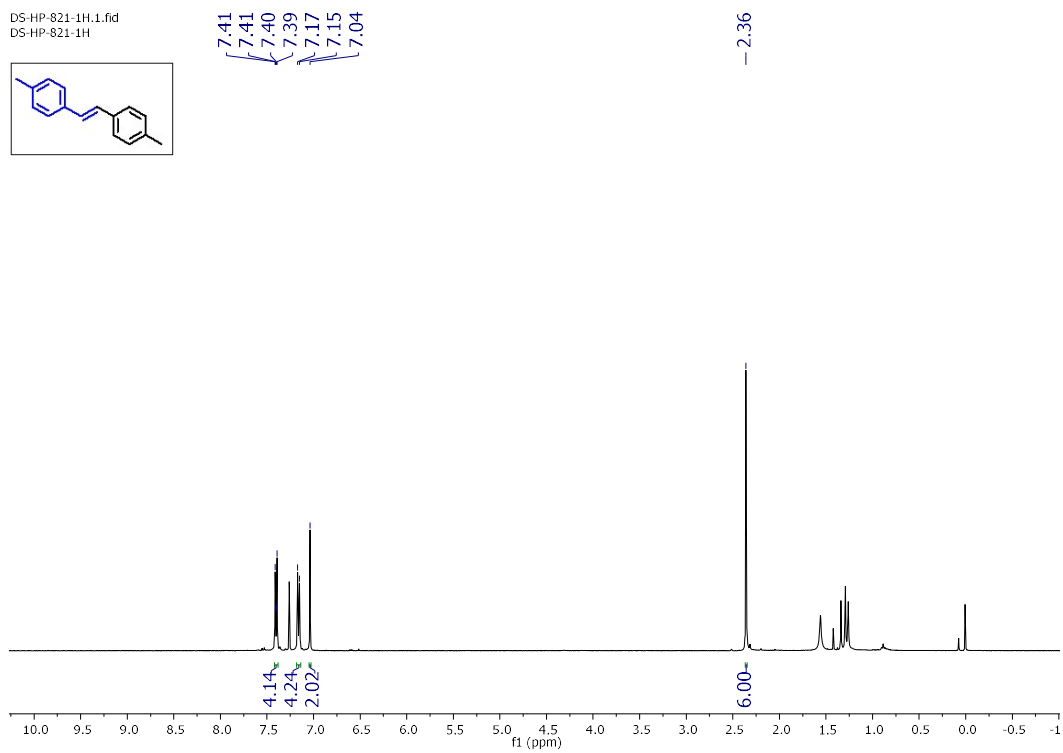

DS-HP-821-13C-500.7.fid  
DS-HP-821-13C-500

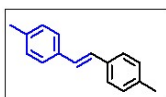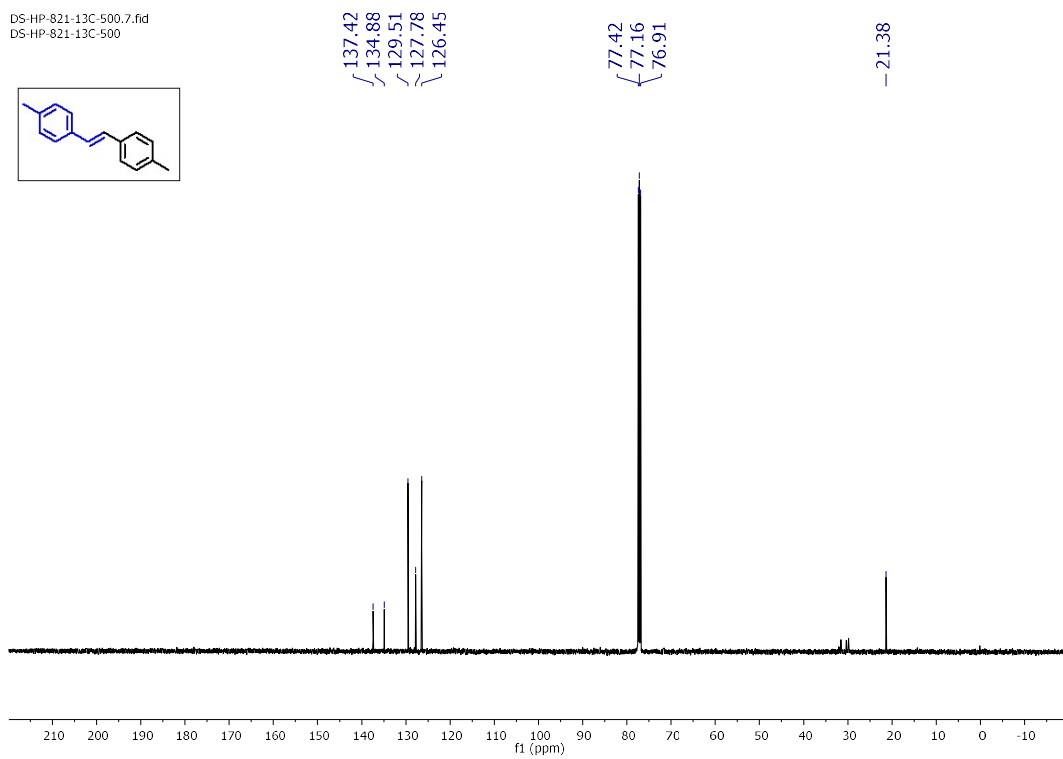

Figure S98.  $^1\text{H}$  NMR (500 MHz),  $^{13}\text{C}\{^1\text{H}\}$  NMR (125 MHz), and  $^{31}\text{P}\{^1\text{H}\}$  NMR (200 MHz) spectrum of Compound 7 in  $\text{CDCl}_3$

#### 14.0 References:

1. A. Samanta, H. J. Phukan, U. K. Tripathi and D. Srimani, *Chem. Commun.*, 2025, **61**, 12582–12585.
2. J. Ke, Y. Tang, H. Yi, Y. Li, Y. Cheng, C. Liu and A. Lei, *Angew. Chem. Int. Ed.*, 2015, **54**, 6604.
3. J. Xiao, J. Wang, H. Zhang, J. Zhang and L.-B. Han, *J. Org. Chem.*, 2023, **88**, 3909-3915.
4. C. Liu, Y. Zhang, X. Gu, N. Huang, M. Zhang and J. Jiang, *Org. Lett.* 2024., **26**, 10594-10599
5. T. Huang, T. Chen and L.-B. Han, *J. Org. Chem.*, 2018, **83**, 2959–2965.
6. B. Chattarjee and C. Gunanathan, *Org. Lett.*, 2015, **17**, 4794–4797.
7. J. S. Zhang, T. Q. Chen, Y. B. Zhou, S. F. Yin and L.-B. Han, *Org. Lett.*, 2018, **20**, 6746-6749.
8. K. Xu, L. Liu, Z. Li, T. Huang, K. Xiang and T. Chen, *J. Org. Chem.*, 2020, **85**, 14653–14663.
9. M. B. Kurosawa, R. Isshiki, K. Muto and J. Yamaguchi, *J. Am. Chem. Soc.*, 2020, **142**, 7386–7392.
10. L. Gan, C. Ye, T. Pi, L. Wang, C. Li, L. Liu, T. Huang, T. Chen, and L. B. Han, *J. Org. Chem.* 2024, **89**, 7047–7057.
11. Q. Li, C. Q. Zhao, T. Chen and L. B. Han, *RSC Adv.*, 2022, **12**, 18441–18444.
12. H. E. Moll, D. Sémeril, D. Matt and L. Toupet, *Adv. Synth. Catal.* 2010, **352**, 901 – 908.
13. C.-T. Yang, J. Han, J. Liu, Y. Li, F. Zhang, M. Gu, S. Hu and X. Wang, *RSC Adv.*, 2017, **7**, 24652–24656.
14. B.-Q. Sun, J. Yang, L. Fan, Q. Xu, S. Wang, H. Zhong and H.-Y. Xiang, *J. Org. Chem.*, 2024, **89**, 11739–117346.
15. C.-K. Li, Z.-K. Tao, A. Shoberu, W. Zhang and J.-P. Zou, *Org. Lett.*, 2022, **24**, 6083–6087.
16. W. J. Yoo and S. Kobayashi, *Green Chem.*, 2013, **15**, 1844–1848.
17. J.-Q. Zhang, E. Ikawa, H. Fujino, Y. Naganawa, Y. Nakajima and L.-B. Han, *J. Org. Chem.*, 2020, **85**, 14166–14173.
18. B. Xiong, G. Wang, C. Zhou, Y. Liu, P. Zhang and K. Tang, *J. Org. Chem.*, 2018, **83**, 993–999.
19. B. Xiong, X. Feng, L. Zhu, T. Chen, Y. Zhou, C.-T. Au and S.-F. Yin, *ACS Catal.*, 2014, **5**, 537-543.
20. H. Wang, L. H. Xu, X. Liu, Y. Shi, Z. Yao, Y. Zhou and Q. Huang, *Org. Biomol. Chem.*, 2024, **22**, 7518.
21. Q. Y. Li, T. R. Swaroop, C. Hou, Z. Q. Wang, Y. M. Pan and H. T. Tang, *Adv. Synth. Catal.*, 2019, **361**, 1761–1765.
22. W. Y. Wang, H. G. Jin, Z. H. Yan, M. C. He, S. Lin and W. S. Tian, *Tetrahedron Lett.*, 2017, **58**, 3489–3492.

23. Y. S. Tan, Y. P. Han, Y. C. Zhang, H. Y. Zhang, J. Q. Zhao and S. D. Yang, *J. Org. Chem.*, 2022, **87**, 3254–3264.
24. J. Shen, Q. W. Li, X. Y. Zhang, X. Wang, G. Z. Li, W. Z. Li, S. D. Yang and B. Yang, *Org. Lett.*, 2021, **23**, 1541–1547.
25. J. Xu, P. Zhang, X. Li, Y. Gao, J. Wu, G. Tang and Y. Zhao, *Adv. Synth. Catal.*, 2014, **356**, 3331.
